# Supplementary material for: Selecting the most appropriate time points to profile in high-throughput studies
Source: eLife journal article supplement (doi:10.7554/elife.18541), 2017-01-26
Supplement: supp [file elife-18541-supp-v1.zip]

Archive with 17 entries (17 files):
- elife_poa_e18541_Figure_2_figure_supplement_3.pdf
- elife_poa_e18541_Figure_5_figure_supplement_1.pdf
- elife_poa_e18541_Figure_1_figure_supplement_2.pdf
- elife_poa_e18541_Figure_3_figure_supplement_1.pdf
- elife_poa_e18541_Figure_1_figure_supplement_1.pdf
- elife_poa_e18541_Figure_1_figure_supplement_3.pdf
- elife_poa_e18541_Figure_2_figure_supplement_4.pdf
- elife_poa_e18541_Figure_2_figure_supplement_2.pdf
- elife_poa_e18541_Figure_2_figure_supplement_1.pdf
- elife_poa_e18541_Figure_5_figure_supplement_2.pdf
- elife_poa_e18541_Supplementary_File_2.xlsx
- elife_poa_e18541_Figure_4_figure_supplement_1.pdf
- elife_poa_e18541_Figure_3_figure_supplement_2.pdf
- elife_poa_e18541_Figure_4_figure_supplement_3.pdf
- elife_poa_e18541_Figure_6_figure_supplement_1.pdf
- elife_poa_e18541_Supplementary_File_1.xlsx
- elife_poa_e18541_Figure_4_figure_supplement_2.pdf
