# Supplementary material for: Selecting the most appropriate time points to profile in high-throughput studies
Source: eLife journal article supplement (doi:10.7554/elife.18541), 2017-01-26
Supplement: supp [file elife-18541-supp-v1.zip › elife_poa_e18541_Supplementary_File_1.xlsx]

## Sheet: RAW DATA
		P0.5-a	P0.5-a	P1-a	P1-a	P1.5-a	P1.5-a	P2-a	P2-a	p2-b	P2.5-a	P2.5-b	P3-a	P3-a	P3-b	P3.5-a	P3.5-b	P4-a	P4-a	P4.5-a	P4.5-b	P5-a	P5-b	P5.5-a	P5.5-a	P6-a	P6.5-a	P6.5-a	P7-c	P7-c	P7-a	P8-a	P8-a	P8.5-a	P8.5-b	P9-a	P9-a	P9.5-a	P9.5-a	P10-a	P10-a	P10.5-a	P11-a	P11-a	P11.5-a	P11.5-a	P12-a	P12-a	P12.5-a
NEG_H		3	1	10	2	2	1	3	1	2	1	3	1	1	2	2	3	5	4	2	2	1	1	3	1	6	3	2	1	3	2	2	8	3	6	1	1	1	3	2	1	2	2	1	2	1	6	10	4
NEG_G		2	2	8	2	4	2	4	1	1	1	5	1	2	1	1	4	6	6	1	3	3	1	1	2	10	3	1	6	5	9	3	2	5	3	2	1	2	2	1	1	4	5	3	6	3	2	9	4
NEG_D		6	5	8	2	8	3	6	3	2	3	4	8	3	2	1	2	6	4	4	3	3	6	7	3	13	5	5	3	5	7	2	3	8	3	3	3	4	3	1	4	5	1	2	3	2	2	8	4
NEG_C		4	4	9	8	4	3	10	4	2	2	7	3	3	4	6	5	16	4	4	1	8	4	8	3	3	1	4	1	5	7	3	6	6	5	8	4	8	1	1	5	5	4	2	5	3	7	11	3
E2F8		5.02	5.09	2.75	5.93	1.38	2.22	1	3.51	2.86	3.31	1.88	6.37	8.28	3.5	5.69	7.53	6.84	4.91	3.32	1.25	5.3	3.14	2.09	8.22	3.9	1.77	4.06	4.73	8.39	2.57	3.95	7.55	3.39	1.62	4.72	3.95	6.21	3.79	5.47	5.72	23.16	46.75	8.12	6.2	1.27	4.02	4.81	2.31
MMP7		5.02	10.17	5.8	23.72	3.79	4.45	7.19	3.51	2.86	3.31	1.25	6.37	8.28	14.02	5.69	1	2.81	1.79	6.64	1.25	10.59	9.41	4.18	2.74	1.22	3.53	4.06	4.73	8.39	5.14	15.79	4.89	1.7	4.85	1.18	3.95	6.21	7.58	5.47	5.72	11.58	18.7	8.12	3.1	1.27	2.74	2.98	6.94
MUC5Ac		2.51	5.09	6.41	11.86	8.27	6.67	6.47	21.05	8.58	3.31	3.14	6.37	8.28	3.5	5.69	1.43	18.24	14.28	3.32	1.25	10.59	3.14	10.45	2.74	4.15	1.77	8.12	9.46	4.19	5.14	3.95	5.63	6.78	4.85	3.54	3.95	12.41	3.79	5.47	5.72	23.16	9.35	24.37	3.1	3.82	3.29	3.31	13.88
KRT5		5.02	10.17	14.34	29.65	2.41	4.45	2.88	7.02	2.86	3.31	5.02	6.37	8.28	3.5	5.69	2.51	5.61	3.35	6.64	1.25	10.59	3.14	2.09	5.48	1.46	1.77	8.12	4.73	8.39	5.14	3.95	4.15	5.09	9.69	3.54	3.95	6.21	3.79	76.52	5.72	11.58	9.35	8.12	3.1	3.82	2.56	1.66	9.25
MCPt4		15.05	15.26	2.44	17.79	3.45	13.34	4.31	3.51	14.31	3.31	3.76	12.74	16.57	7.01	5.69	3.58	4.91	4.69	6.64	3.74	21.19	6.27	4.18	16.45	2.68	3.53	4.06	4.73	12.58	2.57	7.89	5.03	8.48	4.85	10.62	3.95	6.21	3.79	5.47	17.17	11.58	9.35	8.12	6.2	1.27	1.1	2.49	4.63
ubc		12.55	10.17	10.07	5.93	7.24	4.45	7.91	3.51	5.72	3.31	3.14	6.37	8.28	7.01	11.38	4.3	7.19	2.01	6.64	7.48	5.3	3.14	10.45	2.74	7.07	3.53	4.06	14.2	8.39	10.28	3.95	4.89	5.09	4.85	4.72	3.95	6.21	3.79	5.47	11.45	11.58	9.35	8.12	3.1	8.91	5.3	5.3	4.63
NEG_B		10	11	9	6	4	5	7	4	1	8	8	4	6	4	7	5	9	5	6	6	6	11	6	8	9	10	5	11	5	6	14	9	13	6	3	3	2	9	6	5	5	4	5	8	12	8	5	9
KLra4		2.51	10.17	1.83	17.79	2.41	6.67	2.16	7.02	2.86	9.92	2.51	25.49	8.28	3.5	5.69	1	1.75	1.34	13.28	4.98	21.19	6.27	2.09	2.74	1.22	5.3	16.24	14.2	12.58	5.14	3.95	1.04	1.7	6.46	3.54	3.95	6.21	3.79	5.47	22.9	46.32	9.35	8.12	3.1	3.82	1.1	1.99	6.94
NEG_A		8	4	18	5	8	3	7	10	3	5	8	11	7	6	7	9	9	5	8	10	4	8	2	8	9	8	6	14	14	5	3	11	11	5	10	4	3	9	7	5	5	8	4	9	6	14	11	9
SNAI1		5.02	5.09	3.05	17.79	3.1	2.22	2.88	3.51	2.86	3.31	8.78	6.37	8.28	3.5	17.08	3.23	8.59	4.46	6.64	3.74	5.3	3.14	8.36	10.97	7.07	3.53	4.06	4.73	8.39	7.71	7.89	11.4	10.17	3.23	7.08	3.95	6.21	3.79	5.47	11.45	11.58	9.35	24.37	6.2	6.36	19.02	15.58	11.56
AMACR		5.02	25.43	2.75	29.65	2.41	4.45	5.03	10.53	5.72	3.31	2.51	25.49	24.85	10.51	22.77	1.43	2.28	1.56	13.28	7.48	5.3	6.27	2.09	10.97	3.17	8.83	12.18	9.46	12.58	12.85	15.79	3.4	3.39	16.15	8.26	7.91	18.62	3.79	5.47	28.62	34.74	9.35	16.24	3.1	5.09	1.46	2.65	2.31
NEG_E		4	10	14	4	10	6	11	9	6	9	10	11	3	3	5	7	9	10	13	8	2	13	6	19	9	5	7	9	4	11	13	12	16	8	8	4	5	5	6	4	5	10	7	9	9	12	14	13
C/EBP		10.04	15.26	17.39	35.58	14.13	6.67	9.35	10.53	14.31	9.92	14.43	6.37	8.28	3.5	5.69	8.24	11.05	11.16	9.96	6.23	10.59	9.41	2.09	8.22	10.97	12.36	8.12	14.2	4.19	2.57	15.79	25.91	6.78	25.84	14.16	7.91	6.21	3.79	5.47	17.17	11.58	9.35	8.12	6.2	1.27	7.86	10.44	9.25
Ctnna2		17.56	20.34	7.02	29.65	5.17	6.67	9.35	21.05	11.45	23.14	3.76	12.74	8.28	7.01	5.69	3.23	6.31	3.57	23.24	11.21	21.19	21.95	6.27	13.71	1.95	5.3	8.12	9.46	4.19	7.71	11.84	5.33	10.17	12.92	7.08	7.91	12.41	3.79	10.93	11.45	23.16	37.4	24.37	12.41	3.82	2.93	3.48	6.94
Kcnma1		2.51	35.6	3.05	5.93	10.34	8.89	7.91	10.53	8.58	3.31	11.29	6.37	8.28	10.51	22.77	13.98	17.89	14.73	23.24	14.95	26.48	6.27	31.36	30.16	11.7	5.3	8.12	9.46	20.97	7.71	27.63	15.4	10.17	16.15	9.44	15.81	24.82	3.79	5.47	5.72	34.74	9.35	32.49	3.1	1.27	3.29	5.97	9.25
ALDH1A2		25.09	25.43	20.13	35.58	37.55	22.23	15.82	14.04	14.31	26.45	23.21	6.37	8.28	10.51	5.69	11.83	17.01	16.29	23.24	8.72	10.59	21.95	16.73	5.48	7.07	7.06	16.24	18.93	4.19	12.85	27.63	7.85	6.78	9.69	5.9	3.95	18.62	3.79	5.47	45.79	23.16	18.7	8.12	3.1	1.27	8.6	9.12	4.63
NEG_F		13	13	20	8	14	7	13	19	5	4	14	8	13	6	10	13	15	8	10	12	17	21	15	17	11	9	9	13	18	10	9	12	16	11	7	7	13	10	9	6	10	9	5	14	14	5	21	15
FOXD1		7.53	15.26	7.02	17.79	5.51	4.45	10.07	14.04	17.17	6.61	6.27	19.12	33.13	3.5	28.46	4.3	3.86	2.45	36.52	6.23	37.08	6.27	10.45	2.74	3.9	3.53	4.06	18.93	25.17	10.28	23.68	4.29	3.39	8.08	9.44	23.72	24.82	18.95	5.47	17.17	34.74	28.05	8.12	9.31	6.36	3.29	4.64	2.31
MMP-3		15.05	30.52	4.58	71.16	11.71	11.12	12.94	7.02	11.45	13.23	5.65	12.74	16.57	3.5	28.46	2.15	5.79	3.79	16.6	3.74	5.3	6.27	6.27	2.74	2.68	1.77	8.12	14.2	16.78	12.85	15.79	9.03	13.56	14.54	1.18	3.95	12.41	3.79	5.47	28.62	23.16	18.7	24.37	3.1	6.36	5.85	7.29	11.56
PTGS2		22.58	40.69	11.59	5.93	26.53	13.34	10.79	7.02	11.45	9.92	13.17	31.86	8.28	7.01	22.77	11.11	8.24	10.04	3.32	3.74	10.59	25.08	4.18	10.97	4.39	7.06	4.06	37.86	12.58	5.14	7.89	18.5	8.48	14.54	1.18	7.91	12.41	7.58	21.86	5.72	34.74	9.35	32.49	6.2	6.36	9.51	10.61	2.31
Nol3		12.55	5.09	4.27	71.16	5.17	4.45	8.63	14.04	8.58	3.31	3.76	25.49	33.13	14.02	5.69	2.15	4.91	3.57	13.28	6.23	5.3	12.54	8.36	16.45	4.15	7.06	12.18	23.66	33.56	20.56	3.95	7.25	16.95	9.69	8.26	15.81	31.03	11.37	5.47	5.72	23.16	9.35	16.24	31.02	13.99	7.13	5.97	6.94
Thy1		7.53	10.17	60.4	35.58	11.71	13.34	10.07	10.53	8.58	6.61	7.53	19.12	16.57	7.01	17.08	3.23	13.5	18.75	6.64	6.23	5.3	6.27	8.36	19.19	8.05	15.89	4.06	4.73	4.19	17.99	7.89	5.48	8.48	8.08	12.98	7.91	6.21	7.58	5.47	5.72	34.74	18.7	16.24	15.51	12.72	8.96	9.94	13.88
HPGDS		27.6	30.52	15.56	29.65	17.92	4.45	22.29	42.11	20.03	33.06	15.68	31.86	33.13	10.51	17.08	8.96	10.87	12.5	23.24	9.97	21.19	9.41	12.55	8.22	7.8	15.89	12.18	23.66	12.58	23.13	15.79	9.03	10.17	12.92	4.72	7.91	12.41	22.74	16.4	11.45	57.9	18.7	16.24	15.51	7.63	5.67	5.97	6.94
Acta2		15.05	15.26	10.98	77.08	13.09	13.34	17.26	28.07	14.31	16.53	21.33	25.49	24.85	17.52	39.84	13.62	12.63	8.93	36.52	11.21	10.59	18.81	27.18	27.41	14.14	17.65	4.06	37.86	25.17	10.28	15.79	13.03	13.56	21	11.8	19.77	18.62	22.74	10.93	17.17	34.74	9.35	16.24	21.72	10.18	8.96	12.43	6.94
kcne1L		20.07	25.43	7.02	77.08	8.61	8.89	13.66	28.07	20.03	9.92	8.15	38.23	33.13	14.02	22.77	4.3	6.66	7.14	26.56	11.21	15.89	15.68	8.36	24.67	7.8	7.06	24.36	23.66	20.97	28.28	31.57	6.22	28.82	16.15	14.16	15.81	6.21	11.37	38.26	17.17	46.32	28.05	24.37	12.41	6.36	6.95	5.47	13.88
ITGax (CD11c)		17.56	15.26	2.75	17.79	3.45	6.67	9.35	17.54	2.86	9.92	6.27	25.49	8.28	17.52	22.77	9.68	8.77	6.92	16.6	3.74	10.59	3.14	4.18	13.71	9.02	7.06	16.24	14.2	16.78	15.42	11.84	12.44	18.65	11.31	8.26	19.77	43.44	18.95	54.66	5.72	23.16	28.05	16.24	9.31	13.99	17.56	13.26	13.88
Wif1		7.53	10.17	7.02	29.65	6.89	11.12	9.35	17.54	8.58	13.23	15.05	25.49	24.85	7.01	22.77	19.36	18.24	18.08	36.52	22.43	5.3	18.81	10.45	16.45	15.36	24.72	16.24	52.05	29.36	12.85	27.63	22.65	23.74	40.38	29.49	35.58	18.62	26.53	5.47	34.34	69.47	18.7	48.73	31.02	17.81	18.47	21.21	18.5
Sox9		25.09	30.52	15.86	41.51	22.05	26.68	21.57	28.07	14.31	13.23	14.43	44.61	33.13	10.51	28.46	12.19	15.08	14.51	23.24	14.95	15.89	25.08	18.82	19.19	10	14.12	16.24	9.46	25.17	12.85	27.63	15.69	16.95	4.85	16.51	11.86	18.62	18.95	32.79	34.34	46.32	18.7	16.24	12.41	10.18	11.16	10.61	11.56
RAGE		40.15	35.6	23.79	53.37	34.45	37.79	24.45	38.6	34.34	29.76	18.19	44.61	49.7	31.54	28.46	10.4	20.52	20.31	33.2	12.46	15.89	12.54	25.09	41.12	8.29	12.36	20.3	28.39	25.17	15.42	31.57	14.36	22.04	17.77	16.51	7.91	24.82	11.37	27.33	11.45	46.32	9.35	8.12	9.31	5.09	5.67	8.95	9.25
ITgam (CD11b)		17.56	35.6	8.85	29.65	15.16	15.56	23.01	21.05	17.17	13.23	15.05	6.37	41.41	17.52	34.15	10.4	16.84	16.74	6.64	13.71	42.38	18.81	25.09	21.93	25.36	15.89	20.3	28.39	20.97	28.28	7.89	15.1	13.56	17.77	12.98	23.72	18.62	22.74	21.86	40.07	57.9	37.4	32.49	18.61	8.91	15.55	13.26	13.88
MGAT4A		32.62	35.6	18.3	59.3	18.95	20.01	20.85	35.09	28.61	16.53	15.68	19.12	33.13	17.52	28.46	7.89	10	11.16	23.24	9.97	47.67	15.68	14.64	10.97	13.41	14.12	20.3	33.12	20.97	28.28	11.84	9.92	16.95	16.15	11.8	7.91	18.62	22.74	32.79	22.9	81.05	9.35	24.37	12.41	8.91	10.43	9.61	23.13
F13A1		37.64	66.12	60.09	35.58	36.87	20.01	35.95	56.14	42.92	42.98	25.72	70.09	49.7	24.53	11.38	17.21	18.06	19.86	26.56	13.71	21.19	40.76	8.36	21.93	9.27	14.12	12.18	42.59	20.97	17.99	23.68	11.1	11.87	12.92	12.98	3.95	18.62	22.74	16.4	22.9	46.32	9.35	24.37	12.41	8.91	12.99	15.75	4.63
ERB		15.05	20.34	18.61	71.16	14.82	11.12	15.1	21.05	37.2	23.14	11.29	70.09	24.85	10.51	28.46	7.53	9.29	5.36	43.16	7.48	10.59	12.54	8.36	35.64	10	10.59	16.24	37.86	25.17	41.13	27.63	12.88	13.56	16.15	11.8	7.91	12.41	7.58	21.86	45.79	23.16	9.35	24.37	3.1	10.18	10.61	12.93	25.44
NME7		15.05	35.6	22.27	35.58	42.38	33.35	40.99	42.11	42.92	36.37	20.07	31.86	49.7	31.54	17.08	24.38	32.44	33.25	29.88	26.17	21.19	37.62	23	13.71	19.02	8.83	28.42	4.73	20.97	33.42	39.47	24.72	15.26	35.53	27.13	15.81	55.85	53.07	16.4	34.34	46.32	9.35	8.12	15.51	19.08	20.67	24.2	16.19
Claudin 1		45.16	50.86	28.37	59.3	47.55	51.13	43.86	49.12	34.34	23.14	25.72	44.61	24.85	49.06	34.15	12.91	18.41	18.08	29.88	7.48	31.78	15.68	14.64	27.41	15.12	17.65	4.06	28.39	37.75	25.7	31.57	11.84	13.56	8.08	10.62	31.63	6.21	18.95	27.33	28.62	57.9	18.7	16.24	18.61	22.9	16.46	20.05	25.44
RARA RARBRARG Retinoic acid receptors alpha beta gamma		7.53	5.09	25.01	23.72	28.6	31.12	8.63	10.53	14.31	13.23	20.07	19.12	8.28	7.01	17.08	22.58	29.64	29.46	29.88	19.94	10.59	9.41	31.36	24.67	23.17	17.65	16.24	28.39	29.36	25.7	7.89	55.96	40.69	17.77	30.67	19.77	12.41	15.16	32.79	34.34	11.58	18.7	16.24	21.72	16.54	57.07	40.11	27.75
Serpina3		32.62	35.6	25.01	53.37	31.7	13.34	11.51	10.53	22.89	16.53	8.78	31.86	8.28	21.03	28.46	11.11	12.45	14.95	23.24	21.18	21.19	34.49	12.55	32.9	11.95	19.42	8.12	37.86	37.75	20.56	11.84	13.32	30.52	24.23	20.05	15.81	37.23	22.74	49.19	28.62	69.47	28.05	40.61	37.23	27.99	12.99	13.76	25.44
ABCG2		30.11	20.34	66.8	17.79	60.64	13.34	35.23	38.6	40.06	9.92	33.87	19.12	24.85	10.51	28.46	41.58	47	45.52	39.84	21.18	21.19	25.08	20.91	16.45	52.43	15.89	8.12	18.93	8.39	28.28	15.79	52.85	38.99	17.77	23.59	23.72	24.82	18.95	21.86	17.17	34.74	9.35	24.37	12.41	22.9	46.27	47.4	25.44
PCYOX1		35.13	45.77	25.62	29.65	37.9	28.9	28.76	14.04	22.89	36.37	30.11	57.35	33.13	28.04	45.54	30.47	29.81	33.92	33.2	26.17	37.08	40.76	25.09	13.71	26.82	33.54	24.36	18.93	33.56	28.28	23.68	28.72	52.56	17.77	40.11	31.63	37.23	45.48	10.93	17.17	34.74	9.35	40.61	34.13	38.16	25.42	23.37	46.25
MUC5Ab		25.09	30.52	37.21	41.51	17.23	8.89	15.82	126.32	11.45	13.23	5.65	286.75	430.7	24.53	17.08	3.23	214.48	192.14	9.96	23.67	5.3	3.14	23	24.67	4.15	5.3	8.12	4.73	16.78	12.85	15.79	7.25	16.95	11.31	4.72	7.91	6.21	11.37	16.4	28.62	23.16	9.35	8.12	3.1	2.54	4.76	5.8	4.63
EPHA7		15.05	45.77	26.54	94.87	40.31	31.12	23.01	45.62	28.61	36.37	37.64	38.23	24.85	45.56	45.54	29.39	37.88	39.95	49.8	34.89	26.48	37.62	41.82	13.71	31.7	28.25	48.72	37.86	46.14	46.27	59.2	41.45	23.74	32.3	33.03	31.63	55.85	37.9	16.4	51.51	34.74	28.05	56.86	27.92	13.99	19.94	24.7	23.13
LRAT		15.05	40.69	7.63	35.58	8.27	15.56	8.63	17.54	14.31	9.92	6.9	19.12	8.28	3.5	62.61	5.38	5.96	4.91	36.52	7.48	21.19	9.41	16.73	13.71	6.1	15.89	8.12	28.39	4.19	25.7	11.84	8.14	16.95	12.92	10.62	3.95	31.03	15.16	27.33	28.62	92.63	18.7	32.49	21.72	15.27	9.51	10.11	13.88
IGF1		17.56	35.6	27.45	41.51	25.84	24.46	37.39	73.69	22.89	46.29	23.21	25.49	16.57	28.04	85.38	26.89	41.91	36.82	33.2	43.61	15.89	31.35	50.18	30.16	48.28	45.9	60.9	66.25	41.95	61.69	27.63	46.48	32.21	43.61	44.83	39.54	49.64	49.27	38.26	97.3	104.21	28.05	24.37	27.92	17.81	47.74	36.13	39.32
GUCY1A2 sGC(soluble guanylate cyclase) (PMID 23934926)		37.64	25.43	34.77	71.16	31.01	24.46	42.43	28.07	17.17	16.53	26.97	12.74	8.28	3.5	22.77	27.6	23.68	22.09	39.84	22.43	15.89	31.35	31.36	52.09	38.77	17.65	20.3	56.79	58.73	25.7	23.68	29.9	50.86	32.3	41.29	43.49	43.44	11.37	38.26	17.17	104.21	56.1	8.12	40.33	36.89	50.12	41.6	43.94
Shisa3		30.11	20.34	15.86	100.8	18.95	26.68	25.89	45.62	40.06	46.29	18.82	31.86	82.83	21.03	56.92	55.92	49.98	52.67	53.12	90.96	63.56	62.7	64.82	71.28	41.94	37.07	36.54	94.64	96.48	64.26	67.09	53	44.08	29.07	31.85	39.54	24.82	37.9	38.26	28.62	127.37	56.1	16.24	21.72	29.26	19.75	21.88	25.44
PRIM2		35.13	71.21	38.74	29.65	40.31	31.12	40.27	52.63	31.48	29.76	21.33	89.21	99.39	24.53	68.3	38.36	41.56	43.96	46.48	29.9	68.86	28.22	31.36	38.38	35.85	37.07	44.66	28.39	54.53	38.56	39.47	47.67	30.52	30.69	34.21	31.63	55.85	45.48	27.33	34.34	34.74	18.7	56.86	46.54	25.44	32.92	27.18	30.07
TTF-1		35.13	20.34	31.11	106.73	57.19	15.56	44.58	38.6	57.23	33.06	33.87	25.49	24.85	28.04	34.15	24.73	41.39	42.4	39.84	17.44	52.97	21.95	25.09	13.71	32.68	19.42	20.3	52.05	33.56	33.42	39.47	38.34	20.34	46.84	35.39	43.49	31.03	45.48	27.33	40.07	34.74	56.1	40.61	49.64	27.99	35.67	36.79	50.88
EPHA3		85.31	66.12	103.1	94.87	120.59	66.7	90.6	108.77	77.26	109.11	74.02	76.47	41.41	66.59	119.53	66.32	47.18	54	29.88	41.12	63.56	50.16	31.36	63.05	37.55	42.37	48.72	47.32	41.95	38.56	47.36	38.05	22.04	16.15	31.85	35.58	24.82	3.79	10.93	11.45	81.05	9.35	16.24	18.61	20.35	19.02	20.55	20.81
THTPA		57.71	45.77	35.08	59.3	56.85	48.91	48.18	35.09	31.48	59.51	57.71	44.61	49.7	35.05	74	44.81	48.05	40.39	63.08	51.08	37.08	37.62	48.09	49.35	41.21	37.07	20.3	66.25	58.73	38.56	47.36	44.56	55.95	32.3	34.21	43.49	24.82	37.9	54.66	57.24	46.32	9.35	24.37	52.74	33.08	40.06	40.11	57.82
tbp		27.6	55.95	21.05	53.37	25.15	35.57	37.39	28.07	40.06	26.45	23.21	57.35	66.26	35.05	45.54	28.32	26.13	24.1	46.48	32.4	52.97	31.35	16.73	19.19	42.92	33.54	40.6	42.59	41.95	53.98	47.36	24.43	33.91	35.53	36.57	39.54	31.03	49.27	54.66	51.51	34.74	84.15	73.1	65.15	40.71	28.17	24.36	48.57
hprt		35.13	55.95	32.03	71.16	27.91	51.13	33.08	35.09	31.48	23.14	29.48	31.86	24.85	42.06	39.84	32.98	36.65	32.36	76.36	56.07	26.48	31.35	50.18	52.09	34.38	21.19	89.32	47.32	41.95	64.26	27.63	49.59	62.73	59.76	43.65	47.44	80.67	56.86	43.73	74.41	81.05	18.7	97.47	52.74	47.07	42.8	29.17	57.82
Claudin 3		87.82	86.46	68.33	65.23	75.45	95.6	49.62	87.72	42.92	29.76	84.68	57.35	82.83	28.04	45.54	32.98	53.66	47.98	36.52	33.64	31.78	40.76	79.45	21.93	32.43	40.61	60.9	52.05	41.95	64.26	27.63	48.7	57.64	53.3	55.44	59.3	31.03	37.9	38.26	17.17	46.32	37.4	81.22	37.23	24.17	35.48	27.02	43.94
P4HA3		27.6	45.77	13.73	17.79	23.43	33.35	12.22	49.12	20.03	33.06	30.11	19.12	57.98	28.04	51.23	46.6	42.79	49.1	66.4	69.77	42.38	62.7	92	84.98	41.21	40.61	40.6	61.52	117.46	59.12	90.77	101.55	140.72	104.98	93.19	71.16	130.31	60.65	81.99	114.48	115.79	130.9	89.34	52.74	55.98	86.33	79.39	83.26
Dnmt3a		70.26	71.21	46.97	41.51	75.45	57.8	43.86	49.12	31.48	46.29	58.34	76.47	16.57	42.06	56.92	42.3	45.77	51.33	46.48	49.84	37.08	34.49	66.91	46.6	43.89	40.61	48.72	94.64	25.17	53.98	43.41	49.15	61.03	48.45	60.16	86.98	43.44	34.11	54.66	80.13	69.47	65.45	56.86	62.05	67.42	44.45	49.56	53.19
ABCD1		57.71	45.77	28.06	41.51	99.23	140.06	42.43	38.6	45.78	33.06	43.28	50.98	74.54	31.54	34.15	31.19	49.46	50.43	53.12	44.86	26.48	37.62	33.45	71.28	34.14	33.54	48.72	80.45	58.73	41.13	35.52	53	47.47	79.14	50.72	35.58	43.44	49.27	49.19	68.69	69.47	28.05	56.86	58.95	48.34	35.67	38.29	53.19
CD68		40.15	30.52	35.08	35.58	41.34	48.91	74.78	77.19	91.56	46.29	56.46	114.7	74.54	42.06	39.84	50.9	58.93	56.24	46.48	33.64	47.67	25.08	41.82	41.12	51.45	37.07	56.84	42.59	29.36	46.27	39.47	43.82	42.39	25.84	28.31	43.49	24.82	49.27	32.79	40.07	46.32	28.05	32.49	27.92	34.35	64.2	68.12	39.32
CTPS2		77.78	106.81	44.53	41.51	62.71	46.69	50.34	73.69	48.64	33.06	43.28	108.33	33.13	70.09	62.61	49.47	47.35	47.09	46.48	49.84	63.56	75.25	50.18	49.35	35.6	30.01	36.54	66.25	67.12	38.56	63.15	36.57	62.73	45.22	54.26	31.63	55.85	60.65	71.05	45.79	34.74	46.75	56.86	46.54	58.52	43.9	43.59	57.82
EGFR (Epidermal growth factor receptor) (PMID 22916088 22245996)		90.33	244.13	75.65	53.37	93.02	84.48	62.56	49.12	185.99	39.68	207.63	76.47	57.98	161.21	62.61	177.44	54.89	54.45	56.44	203.09	52.97	141.09	64.82	54.83	37.8	37.07	48.72	61.52	50.34	59.12	55.25	72.24	59.34	172.82	57.8	39.54	62.05	60.65	49.19	62.96	46.32	74.8	40.61	34.13	58.52	49.38	128.78	71.69
Robo1		72.76	76.29	61.62	71.16	77.52	53.36	43.14	80.7	42.92	36.37	60.22	95.58	33.13	59.58	62.61	93.92	72.78	71.86	122.83	95.94	95.34	109.73	52.27	74.02	71.45	58.26	60.9	75.71	67.12	66.83	118.4	72.54	69.51	58.14	86.11	75.12	86.87	83.39	43.73	91.58	46.32	28.05	48.73	34.13	61.06	52.86	52.04	64.76
hmbs		72.76	76.29	63.75	59.3	75.8	62.25	61.12	77.19	82.98	82.66	57.08	57.35	66.26	42.06	74	60.58	63.66	69.63	79.68	71.02	58.27	72.11	58.54	54.83	73.16	58.26	60.9	61.52	50.34	46.27	67.09	79.2	54.25	54.91	75.5	47.44	80.67	60.65	54.66	57.24	81.05	56.1	32.49	46.54	43.25	53.41	57.18	55.51
PHGDH		67.75	55.95	74.73	634.47	75.8	75.59	96.36	98.25	34.34	46.29	26.97	63.72	49.7	38.55	96.76	21.15	56.12	39.5	43.16	39.87	58.27	47.03	46	46.6	40.24	15.89	44.66	42.59	54.53	38.56	47.36	70.02	16.95	43.61	55.44	19.77	37.23	56.86	27.33	34.34	46.32	46.75	56.86	49.64	44.53	41.52	36.96	39.32
Claudin 7		57.71	40.69	59.18	53.37	59.26	60.03	41.71	66.67	54.37	36.37	52.06	70.09	74.54	49.06	45.54	43.02	56.82	52.44	56.44	48.59	31.78	53.3	100.36	93.21	37.07	40.61	32.48	75.71	62.92	66.83	31.57	92.67	84.77	116.29	66.06	94.89	49.64	41.69	120.24	51.51	104.21	37.4	73.1	83.76	41.98	53.41	47.24	50.88
GUSB		82.8	76.29	51.55	41.51	66.5	60.03	49.62	84.21	91.56	99.19	82.8	63.72	33.13	59.58	91.07	79.58	68.75	66.73	73.04	42.36	68.86	59.57	62.73	41.12	56.82	51.2	40.6	66.25	62.92	46.27	39.47	65.14	47.47	59.76	50.72	67.21	99.28	60.65	60.12	68.69	34.74	84.15	73.1	55.84	55.98	56.52	63.98	55.51
Lrp2		25.09	30.52	22.57	47.44	34.11	22.23	32.36	35.09	60.09	33.06	49.56	70.09	49.7	45.56	39.84	21.51	40.51	37.04	6.64	29.9	26.48	34.49	43.91	32.9	33.9	31.78	36.54	66.25	54.53	28.28	63.15	46.93	52.56	38.76	31.85	51.4	31.03	18.95	65.59	40.07	11.58	46.75	81.22	65.15	30.53	56.15	60.16	48.57
pgk1		40.15	66.12	65.58	71.16	53.4	66.7	56.81	38.6	60.09	42.98	50.18	76.47	57.98	98.13	39.84	44.81	59.8	59.58	46.48	62.3	74.16	37.62	66.91	90.47	57.55	54.73	93.38	66.25	88.09	61.69	74.99	75.35	71.21	41.99	60.16	51.4	68.26	56.86	81.99	45.79	104.21	56.1	40.61	74.46	63.61	69.32	53.53	76.32
NFATC3		102.87	91.55	100.66	71.16	85.1	62.25	80.54	59.65	82.98	99.19	69.63	70.09	74.54	77.1	74	76.71	50.86	58.47	96.28	79.74	37.08	78.38	54.36	57.57	68.52	58.26	56.84	42.59	46.14	48.84	94.72	48.26	33.91	30.69	66.06	71.16	74.46	72.02	54.66	40.07	57.9	9.35	40.61	43.43	66.15	64.02	62.98	53.19
Src		70.26	30.52	57.34	53.37	74.42	60.03	36.67	24.56	34.34	39.68	44.54	63.72	49.7	56.07	17.08	47.32	69.27	58.47	33.2	51.08	31.78	50.16	50.18	54.83	57.31	51.2	36.54	80.45	109.07	56.55	51.31	88.97	69.51	85.6	77.86	51.4	80.67	64.44	21.86	85.86	115.79	18.7	32.49	62.05	91.6	86.88	70.44	90.2
FSP1 (S100a4)		57.71	50.86	57.65	124.52	59.26	42.24	52.49	70.18	45.78	39.68	34.5	50.98	41.41	70.09	51.23	45.88	51.74	51.33	59.76	42.36	42.38	25.08	71.09	65.79	67.3	28.25	44.66	61.52	58.73	46.27	63.15	44.86	47.47	45.22	58.98	43.49	37.23	37.9	65.59	80.13	81.05	93.5	56.86	71.35	40.71	97.3	95.3	67.07
Epcam		80.29	116.98	107.67	106.73	116.11	91.15	78.38	105.27	80.12	56.21	85.31	82.84	82.83	73.6	108.15	71.34	76.81	75.21	79.68	62.3	31.78	90.92	54.36	68.54	54.62	51.2	36.54	66.25	54.53	51.41	78.93	76.98	54.25	43.61	67.24	59.3	49.64	79.6	71.05	51.51	104.21	18.7	97.47	62.05	49.61	54.87	59.17	64.76
ipo8		55.2	55.95	51.55	94.87	84.07	73.37	62.56	73.69	68.67	66.13	51.44	70.09	74.54	52.57	45.54	61.66	72.78	85.25	92.96	83.48	47.67	90.92	60.63	82.24	59.74	52.96	32.48	75.71	67.12	61.69	90.77	69.73	57.64	74.3	68.42	79.07	74.46	45.48	54.66	62.96	92.63	84.15	48.73	58.95	53.43	57.8	60.83	64.76
FGF18 (PMID 21878612 17303798)		35.13	71.21	27.15	71.16	67.53	35.57	47.46	38.6	37.2	46.29	57.71	38.23	49.7	38.55	74	69.54	71.9	78.11	66.4	110.89	58.27	65.84	69	46.6	79.01	58.26	69.02	89.91	104.87	77.11	98.66	147.74	135.63	153.44	168.69	114.65	111.69	106.13	87.45	45.79	196.84	65.45	129.96	96.17	91.6	128.76	117.51	90.2
POS_F		64	49	108	68	82	48	89	75	21	38	79	73	52	19	26	61	76	67	80	61	65	76	62	71	91	63	74	67	55	79	45	82	91	64	63	44	52	46	77	41	54	56	48	70	65	95	93	88
NME3		50.18	55.95	57.34	124.52	59.26	60.03	53.21	56.14	40.06	29.76	53.32	101.96	82.83	42.06	34.15	37.28	66.12	68.06	69.72	43.61	52.97	43.89	62.73	82.24	43.65	31.78	56.84	108.84	79.7	53.98	74.99	88.67	57.64	104.98	80.21	79.07	68.26	60.65	71.05	97.3	81.05	130.9	89.34	74.46	61.06	69.69	76.41	76.32
N-Cadherin(CDH2)		60.22	61.03	50.63	88.94	107.84	37.79	53.93	77.19	54.37	49.6	63.36	44.61	107.68	66.59	108.15	81.02	124.34	124.3	96.28	79.74	79.45	106.6	135.91	126.1	87.79	75.91	85.26	123.04	109.07	100.25	126.29	144.78	89.86	135.67	134.48	114.65	86.87	79.6	49.19	120.2	196.84	93.5	81.22	71.35	105.59	104.25	109.88	67.07
LFNG (Lunatic Fringe) (PMID 19897741)		65.24	71.21	75.04	94.87	86.13	51.13	58.24	84.21	42.92	85.96	57.71	50.98	66.26	84.11	39.84	73.85	89.62	72.75	116.19	88.46	42.38	100.33	81.54	87.72	89.01	65.32	73.08	137.23	113.26	89.97	86.83	118.43	98.33	109.83	116.78	59.3	43.44	83.39	38.26	74.41	46.32	84.15	56.86	49.64	66.15	65.84	78.23	97.13
KRT18		158.07	310.25	208.64	160.1	186.39	182.3	145.25	150.88	97.29	112.42	104.76	152.93	165.65	136.68	79.69	71.69	81.9	72.08	83	59.81	52.97	62.7	94.09	79.5	53.89	60.03	56.84	70.98	88.09	118.24	106.56	65.43	120.37	56.53	60.16	83.02	68.26	102.34	38.26	80.13	57.9	93.5	81.22	83.76	62.34	52.86	51.21	53.19
TBX4		52.69	66.12	67.41	47.44	76.14	55.58	31.64	38.6	28.61	29.76	50.18	19.12	91.11	49.06	39.84	73.13	77.69	69.18	129.47	114.63	52.97	72.11	96.18	123.36	83.15	95.33	117.74	165.62	113.26	79.68	63.15	137.53	122.07	145.36	135.66	94.89	105.49	117.5	76.52	114.48	127.37	102.85	121.83	93.07	145.03	119.43	101.76	152.64
GATA-6		120.44	157.67	99.13	106.73	160.9	120.05	114.33	101.76	165.96	135.56	112.28	70.09	132.52	94.63	62.61	116.15	111.71	125.42	129.47	104.66	95.34	97.19	69	123.36	92.91	90.04	117.74	94.64	92.29	69.4	114.45	83.64	96.64	67.84	99.09	98.84	68.26	94.76	54.66	45.79	162.11	56.1	48.73	71.35	78.87	83.04	83.37	87.88
tfrc		105.38	71.21	64.06	35.58	102.33	53.36	133.03	112.28	111.59	82.66	58.34	95.58	107.68	59.58	113.84	98.22	98.91	103.32	102.92	76	68.86	50.16	62.73	76.76	96.08	72.38	93.38	85.18	79.7	87.4	110.5	104.07	101.72	54.91	87.29	114.65	117.9	106.13	120.24	91.58	34.74	74.8	40.61	55.84	95.41	121.45	131.1	80.94
BCL2A1		107.89	96.64	93.34	177.89	121.97	106.71	169.7	221.06	151.65	155.4	102.25	89.21	107.68	203.27	108.15	103.24	80.32	88.37	59.76	85.97	21.19	75.25	62.73	57.57	99.74	51.2	77.14	85.18	75.51	66.83	114.45	84.83	64.43	51.68	70.78	67.21	55.85	94.76	54.66	91.58	57.9	65.45	81.22	49.64	76.33	94.38	115.19	76.32
Igfbp3		185.68	289.91	301.98	171.96	266.67	200.09	84.13	84.21	65.81	66.13	80.92	101.96	107.68	66.59	74	46.96	56.82	63.38	33.2	22.43	42.38	40.76	69	60.31	17.31	22.95	8.12	18.93	29.36	43.7	51.31	38.49	45.78	53.3	37.75	59.3	18.62	34.11	49.19	62.96	81.05	84.15	81.22	65.15	67.42	40.79	43.09	41.63
GFPT1		120.44	132.24	128.11	71.16	134.71	108.94	113.61	101.76	80.12	102.5	131.1	127.44	99.39	112.15	85.38	95.71	129.43	144.83	89.64	82.23	84.75	47.03	104.54	115.14	82.42	61.79	40.6	99.37	104.87	79.68	169.7	140.04	83.07	211.58	126.22	110.7	130.31	125.08	153.04	114.48	81.05	84.15	73.1	114.79	96.68	129.31	138.06	122.57
FOXF2		32.62	25.43	35.08	71.16	42.38	37.79	38.11	56.14	34.34	49.6	37.64	76.47	57.98	31.54	68.3	50.19	90.67	73.64	92.96	125.84	79.45	75.25	152.63	128.85	97.05	81.21	56.84	118.3	113.26	128.52	122.34	240.86	139.02	167.97	214.69	162.1	124.1	117.5	81.99	85.86	196.84	149.6	211.18	136.5	151.39	211.8	175.68	148.01
CD38		42.66	61.03	63.75	100.8	95.78	46.69	61.12	49.12	51.51	33.06	49.56	31.86	66.26	17.52	39.84	58.79	67.17	65.83	69.72	48.59	31.78	56.43	69	60.31	62.67	45.9	48.72	85.18	75.51	28.28	82.88	119.76	88.16	151.82	100.27	138.37	37.23	72.02	87.45	85.86	138.95	74.8	105.59	80.66	94.14	104.62	102.43	104.07
SMAD3		163.09	147.5	104.01	130.45	147.46	135.62	108.58	122.81	85.84	128.95	121.07	114.7	99.39	77.1	119.53	109.33	126.27	124.97	136.11	135.81	90.05	94.06	156.81	120.62	97.79	84.74	97.44	80.45	134.24	113.1	142.08	150.26	172.93	209.97	108.53	118.61	167.54	128.87	49.19	171.71	92.63	102.85	162.44	120.99	148.84	124.19	124.14	101.76
PRDX3		130.47	193.27	156.48	112.66	173.3	162.29	153.88	178.95	188.85	158.7	108.52	172.05	132.52	171.73	153.69	130.84	102.77	120.95	106.23	119.61	127.13	125.41	89.91	98.69	107.54	67.09	85.26	99.37	71.31	92.54	153.92	86.01	123.76	58.14	107.35	122.56	130.31	106.13	87.45	120.2	127.37	56.1	73.1	99.28	117.04	101.51	91.49	117.95
PRSS35		40.15	35.6	27.76	106.73	48.92	35.57	81.26	80.7	85.84	89.27	121.69	82.84	107.68	94.63	182.15	227.63	210.1	191.7	258.95	295.3	174.8	253.96	282.27	224.8	272.14	236.57	267.97	340.71	268.48	213.35	288.1	292.37	257.7	229.35	314.96	343.96	210.98	212.26	153.04	194.61	115.79	158.95	113.71	130.3	148.84	180.16	175.85	134.14
TST		286.04	289.91	228.16	207.54	274.25	273.45	271.81	382.47	220.33	264.51	215.16	146.56	149.09	161.21	216.3	126.54	151.52	171.61	119.51	102.17	121.83	103.46	167.27	145.29	93.88	58.26	48.72	146.7	79.7	154.23	189.44	111.47	130.55	117.9	109.7	118.61	68.26	121.29	109.31	125.92	185.27	102.85	97.47	96.17	105.59	96.02	108.23	99.45
EXT1		140.51	122.07	118.96	94.87	147.12	117.83	131.59	129.83	77.26	155.4	151.18	127.44	173.94	108.64	250.45	188.2	145.39	166.92	175.95	181.91	158.91	153.63	169.36	216.57	181.67	139.47	154.29	222.41	192.97	172.22	169.7	194.08	125.46	122.75	213.51	138.37	223.39	162.99	109.31	108.75	150.53	140.25	113.71	155.12	155.2	162.42	145.02	138.76
PDGFRb		52.69	55.95	54.6	53.37	76.14	31.12	53.93	52.63	42.92	82.66	50.81	89.21	99.39	49.06	34.15	68.47	68.57	80.78	122.83	99.68	68.86	84.65	169.36	189.16	75.59	70.62	93.38	165.62	201.36	118.24	94.72	128.35	155.98	201.89	193.46	229.31	124.1	121.29	191.3	154.54	208.42	224.41	333.01	248.19	208.63	162.78	134.25	233.58
ATP1B1		198.22	330.6	330.34	326.13	544.71	217.87	242.33	140.35	123.04	112.42	196.97	159.31	49.7	150.7	91.07	88.18	109.43	116.04	96.28	59.81	52.97	103.46	119.18	57.57	100.96	75.91	77.14	85.18	96.48	123.38	126.29	125.09	94.94	85.6	128.58	94.89	68.26	64.44	43.73	91.58	162.11	102.85	64.98	65.15	75.06	92	95.96	94.82
DLK1		712.59	1098.59	2313.02	1085.12	867.89	938.19	178.33	185.97	151.65	72.74	132.98	197.54	231.92	108.64	165.07	165.26	256.22	285.87	182.59	110.89	111.23	178.71	296.9	378.31	62.91	77.68	52.78	61.52	37.75	71.97	71.04	60.25	50.86	29.07	27.13	11.86	24.82	56.86	10.93	28.62	11.58	28.05	16.24	21.72	10.18	7.5	7.62	4.63
TGFB1 TGFB2 (Transforming growth factor beta1 and 2)		140.51	147.5	112.25	53.37	173.3	175.63	109.3	140.35	177.41	125.64	163.09	159.31	124.24	164.72	165.07	144.82	140.3	149.52	142.75	148.27	100.64	175.57	206.99	246.73	141.68	134.17	146.17	127.77	213.94	125.95	153.92	153.51	237.36	161.51	176.94	166.05	186.15	121.29	147.57	194.61	150.53	149.6	146.2	214.06	161.56	186.19	197.89	185.02
Hist1h2ab		35.13	76.29	306.25	142.31	30.66	22.23	82.69	84.21	74.4	72.74	72.77	127.44	198.78	269.86	512.28	402.92	339	338.09	471.42	627.97	264.84	649	158.9	180.93	442.11	474.91	361.35	425.89	356.57	287.89	288.1	257.88	179.71	103.37	324.4	256.98	359.9	325.97	114.78	286.19	220	102.85	121.83	139.61	133.58	178.15	180.32	171.14
PDGFRA (platelet-derived growth factor receptor alpha) (PMID 23748534) (Most important)		70.26	91.55	93.64	77.08	113.35	77.81	77.66	98.25	42.92	72.74	53.95	50.98	91.11	63.08	85.38	95.71	88.74	90.83	129.47	137.06	52.97	97.19	87.82	115.14	80.23	86.51	93.38	94.64	125.85	84.83	138.13	143.15	169.54	192.2	150.99	177.91	186.15	136.45	147.57	148.82	150.53	168.3	227.42	161.32	209.91	155.83	171.04	171.14
ADAMTSL2		130.47	127.15	156.48	124.52	156.08	102.27	53.93	66.67	42.92	36.37	28.86	25.49	33.13	14.02	34.15	28.32	28.59	24.1	46.48	38.63	26.48	47.03	31.36	35.64	29.26	28.25	28.42	61.52	58.73	46.27	98.66	80.83	145.8	247.11	176.94	158.14	155.13	140.24	87.45	154.54	220	130.9	162.44	136.5	174.29	143.76	161.1	231.27
FGFR2		318.66	244.13	290.69	160.1	269.77	224.54	202.78	228.08	185.99	234.75	207.63	178.42	198.78	161.21	170.76	177.44	178.36	184.33	179.27	203.09	95.34	141.09	227.9	191.9	138.75	125.35	113.68	194.02	197.16	146.52	228.9	197.19	218.71	172.82	152.17	162.1	148.92	170.57	120.24	177.44	81.05	121.55	178.69	114.79	139.94	132.6	128.78	178.08
TCF12		283.53	244.13	255.31	136.38	271.15	224.54	200.62	242.11	203.16	234.75	207	203.91	215.35	196.26	261.83	232.29	223.95	259.54	258.95	285.33	127.13	200.66	269.72	194.64	204.35	171.25	174.59	189.28	184.58	146.52	311.78	249.15	181.41	221.27	243	209.54	198.56	235	136.64	206.06	196.84	187.01	268.03	120.99	216.27	185.46	196.23	196.58
HIF1alpha		296.08	244.13	333.39	201.61	312.15	197.87	214.28	273.69	226.05	198.38	222.06	261.26	223.63	255.84	273.22	271.72	265.69	269.13	285.51	241.72	211.88	222.6	177.72	233.02	221.91	169.48	129.92	236.61	197.16	159.37	248.64	241.3	205.14	218.04	220.59	177.91	273.03	204.68	120.24	217.5	208.42	168.3	146.2	158.22	171.74	206.31	207.17	212.77
integrin subunit alpha 8		225.82	147.5	144.28	94.87	177.44	166.74	125.12	112.28	77.26	105.8	78.41	146.56	99.39	80.61	102.46	129.05	127.32	114.26	66.4	104.66	116.53	103.46	190.27	224.8	124.12	143	85.26	141.96	121.65	100.25	181.54	185.64	188.19	190.59	126.22	170	161.33	136.45	103.85	154.54	127.37	140.25	194.93	198.55	198.46	239.78	198.06	203.52
ABCA3		163.09	213.62	326.68	225.32	365.21	173.41	281.88	242.11	203.16	142.17	230.84	114.7	124.24	150.7	102.46	138.73	238.33	222.27	225.75	114.63	47.67	116	167.27	120.62	230.2	157.13	142.1	203.48	138.43	213.35	138.13	296.22	142.41	166.36	272.49	185.82	99.28	136.45	120.24	125.92	150.53	140.25	138.08	130.3	199.73	222.77	196.4	215.08
E-Cadherin (CDH1)		240.88	452.66	348.95	225.32	418.61	326.81	145.97	157.9	251.8	171.93	270.36	165.68	289.89	189.25	96.76	208.63	272.18	245.25	146.07	148.27	84.75	156.76	204.9	205.61	141.68	132.41	154.29	293.39	239.11	192.79	224.96	311.03	186.49	360.17	187.56	213.49	155.13	178.15	136.64	206.06	173.69	149.6	227.42	161.32	169.2	247.1	233.36	152.64
POS_E		177	158	336	200	271	112	261	135	49	123	172	191	143	48	105	146	249	157	226	143	141	151	199	237	294	208	172	202	189	228	130	277	233	138	177	107	137	117	247	138	128	136	126	229	208	313	221	281
Aqp5(Aquaporin)		117.93	137.32	158.92	142.31	141.26	160.07	110.02	73.69	128.76	132.25	161.84	152.93	157.37	87.62	56.92	136.22	110.31	106	146.07	190.63	74.16	153.63	255.08	290.59	129	203.03	259.85	236.61	243.31	154.23	181.54	244.71	356.04	415.09	252.44	268.84	254.41	288.07	196.76	223.23	162.11	374.01	268.03	322.65	251.89	216.74	191.1	259.02
Chi3l3/Chi3l4		65.24	45.77	24.4	83.01	48.58	28.9	46.74	59.65	20.03	59.51	23.84	31.86	74.54	45.56	51.23	27.6	11.22	7.81	26.56	16.2	21.19	15.68	12.55	21.93	29.02	26.48	40.6	23.66	16.78	43.7	126.29	40.27	83.07	19.38	58.98	399.31	62.05	41.69	180.37	274.74	92.63	74.8	170.57	24.82	43.25	761.42	824.38	356.16
ALDH1A1 (PMID 11751205)		293.57	417.06	118.66	100.8	438.25	295.69	497.6	410.54	420.63	234.75	369.47	267.63	438.98	262.85	295.99	221.18	268.85	258.87	119.51	73.51	111.23	75.25	209.09	134.33	130.71	97.1	77.14	108.84	88.09	295.61	185.49	137.97	128.85	51.68	153.35	126.51	105.49	75.81	174.9	194.61	185.27	121.55	73.1	114.79	94.14	158.76	149.33	157.26
polr2a		434.08	508.61	435.88	314.27	502.33	442.42	376.79	522.82	363.4	426.52	324.93	286.75	372.72	329.44	318.75	359.19	284.98	304.84	285.51	315.23	307.22	344.88	275.99	268.66	254.34	259.52	186.77	222.41	197.16	221.06	284.16	249.59	239.05	221.27	248.9	221.4	223.39	235	218.63	211.78	370.53	140.25	227.42	179.94	258.25	232.83	229.05	235.9
rplp2		291.06	259.39	471.57	426.93	462.37	353.49	287.63	312.29	311.89	267.81	290.43	267.63	289.89	210.28	278.91	265.99	426.16	436.73	371.82	337.66	121.83	319.8	301.08	257.69	316.52	331.9	292.33	326.52	373.35	300.75	295.99	379.27	272.96	268.11	428.2	264.89	328.87	284.28	218.63	257.57	370.53	271.16	186.81	220.27	258.25	306.73	274.63	254.4
PDPn(Podoplanin)		235.86	152.58	182.1	130.45	325.59	215.65	173.3	207.02	243.22	195.07	173.76	152.93	207.07	154.2	244.76	159.88	187.12	199.73	285.51	249.19	100.64	263.36	217.45	197.38	188.99	139.47	162.41	156.16	205.55	143.95	224.96	279.49	239.05	208.35	238.28	253.03	217.18	162.99	180.37	183.16	185.27	224.41	308.65	223.37	209.91	321.54	337.28	314.53
Akt		286.04	203.44	238.23	201.61	356.94	342.37	234.42	200	163.1	204.99	299.22	203.91	323.03	304.9	244.76	339.12	399.33	363.98	302.11	363.82	254.25	288.44	487.17	433.14	301.16	263.05	308.57	392.77	495.01	298.18	343.35	537.67	493.36	486.15	423.48	304.42	297.85	307.02	235.02	206.06	335.79	458.16	357.38	291.62	357.48	377.51	307.61	335.34
Hist1h1b		135.49	106.81	534.71	326.13	68.56	57.8	88.45	140.35	114.46	135.56	149.29	210.28	314.74	350.46	768.43	619.08	508.06	570.18	979.35	1020.45	746.86	708.57	547.8	671.64	583.78	880.96	743.01	615.18	734.12	501.24	524.9	666.61	608.65	423.16	607.51	573.26	546.05	670.9	256.89	320.53	289.48	84.15	194.93	164.43	183.19	272.71	231.04	286.78
LOX		868.16	818.86	1198.75	610.75	943	686.97	609.05	824.58	417.76	456.27	347.52	477.92	472.11	424.06	404.13	330.15	349.52	378.93	292.15	249.19	238.36	169.3	294.81	252.21	194.59	252.46	207.07	208.21	201.36	239.05	276.26	197.93	272.96	182.51	292.55	245.12	335.08	405.57	213.16	309.08	243.16	243.11	268.03	192.35	263.34	275.08	273.14	296.03
P-63		554.52	727.31	556.98	403.21	653.24	569.14	642.85	810.55	652.4	595.14	523.78	548.01	405.85	648.36	700.12	653.5	480	467.97	464.78	494.65	397.27	482.83	349.17	309.78	431.13	361.92	284.21	279.2	356.57	365.01	442.02	357.51	328.91	235.81	412.87	367.68	403.33	409.36	207.7	297.64	393.69	149.6	251.79	189.24	292.6	337.27	350.04	298.34
Chi3l1		155.57	81.38	527.7	77.08	201.55	77.81	291.22	150.88	197.44	175.24	383.27	229.4	198.78	168.22	113.84	435.55	486.66	447.21	152.71	183.16	63.56	147.36	244.63	186.42	503.8	120.05	138.04	241.34	213.94	298.18	209.17	408.14	227.18	255.19	285.47	189.77	161.33	94.76	131.18	183.16	92.63	84.15	121.83	80.66	217.54	1283.79	1052.11	240.52
Cdh11		524.41	345.85	265.98	160.1	501.65	366.83	503.35	628.09	403.46	486.03	512.49	414.19	273.33	518.69	757.04	794.74	641.52	623.07	753.6	970.61	524.39	805.76	455.81	498.94	769.11	632.03	604.96	582.05	583.1	619.49	734.07	744.33	474.71	423.16	608.69	604.89	707.39	746.7	327.94	457.9	544.22	252.46	292.4	269.91	422.36	405.31	469.21	360.78
ywhaz		361.31	300.08	466.08	379.49	577.44	302.36	392.61	407.03	480.72	350.47	494.3	407.82	339.59	441.58	335.83	497.92	517.71	515.72	471.42	554.46	270.14	492.23	464.17	372.83	422.11	407.82	373.53	440.09	469.84	393.28	536.74	527.16	484.89	671.89	543.81	387.45	341.28	356.29	311.54	400.66	428.43	430.11	389.87	369.18	468.15	492.92	545.11	504.17
Tnc		348.77	142.41	180.58	106.73	455.48	313.47	254.55	375.45	257.53	400.07	427.18	395.08	323.03	515.18	523.67	725.19	701.15	733.53	833.28	963.14	418.45	934.3	873.98	814.2	625.73	538.46	438.5	847.05	797.05	668.32	939.29	1201.32	1037.59	1605.44	1086.43	1110.95	1061.08	833.88	650.41	744.09	544.22	570.37	674.15	462.25	632.26	759.04	881.56	629.06
NDST1		567.06	579.81	391.96	302.41	682.53	551.36	388.3	431.59	546.53	595.14	534.45	388.71	356.16	473.13	295.99	488.6	434.23	417.09	428.26	479.7	254.25	420.12	426.53	367.35	404.8	414.88	389.77	468.48	406.91	308.46	434.13	472.68	515.4	505.54	574.48	411.17	583.28	545.81	273.28	314.81	347.37	458.16	381.75	403.31	478.33	395.43	401.42	538.86
Vegf		278.51	193.27	170.81	160.1	445.49	231.21	232.98	231.58	286.14	208.3	365.71	159.31	198.78	101.63	182.15	169.2	420.37	341.88	461.46	382.51	95.34	319.8	336.63	186.42	353.59	248.93	223.31	492.14	444.67	454.97	489.38	695.63	442.5	449.01	805.68	680.01	316.46	447.26	306.08	446.45	486.32	402.06	471.09	325.75	426.17	463.47	435.39	527.3
FOXF1		368.84	208.53	190.03	112.66	213.61	217.87	212.13	196.5	266.11	271.12	428.44	248.52	389.29	325.93	284.6	357.04	334.97	297.7	640.73	650.4	391.97	304.12	894.89	814.2	406.02	478.44	438.5	530	515.98	506.38	670.92	810.06	901.96	898.01	843.43	846.06	521.23	477.59	256.89	400.66	393.69	598.42	633.53	409.51	403.27	569.92	580.08	497.23
Claudin5		567.06	381.46	400.8	367.64	472.7	446.86	379.67	371.94	251.8	651.35	761.53	516.15	447.27	392.52	461.06	638.8	500.17	542.73	866.48	776.24	476.72	445.21	1204.33	1074.63	582.08	672.64	633.38	728.75	797.05	606.63	1081.37	1201.03	1576.73	1660.35	1295.23	933.04	570.87	697.43	420.86	503.69	706.32	1112.68	1315.8	604.96	898.14	837.51	832.17	774.76
Col1a1		479.24	452.66	602.73	314.27	772.45	486.88	605.46	768.44	354.81	657.96	808.57	936.72	1118.17	571.26	1013.18	1140.66	1555.57	1665	710.45	1173.71	577.36	981.33	1762.59	1384.41	702.54	783.86	844.51	795	889.34	1138.72	1176.09	1074.45	1169.83	967.46	1161.93	1012.11	1247.23	1436.55	1109.53	1224.88	1030.54	832.17	771.61	918.3	1020.27	926.94	856.37	1123.98
SFTP-D		1267.11	864.63	509.7	237.18	1649.3	1309.47	1215.95	1171.96	1227.54	869.57	834.92	681.83	720.6	953.26	643.2	563.16	655.2	656.09	434.9	348.87	201.28	363.69	556.17	564.73	445.03	372.51	466.92	643.57	620.86	562.93	536.74	724.64	742.59	941.62	605.15	624.66	558.46	488.96	497.38	692.58	567.38	598.42	552.31	474.66	487.24	1058.09	901.45	636
ppia		991.1	869.72	1163.07	1037.68	1333.7	835.93	1049.85	1238.63	1304.8	1034.88	1087.72	962.21	836.55	1450.92	1280.71	1385.86	1151.86	1214.22	1271.5	1209.84	762.75	1213.34	1043.34	1052.7	1062.96	903.91	872.93	989.01	935.48	940.8	1211.61	1162.98	973.16	1162.89	1119.46	873.73	905.95	958.96	765.19	784.16	856.85	654.52	869.08	632.88	781.11	883.6	941.89	716.94
INMT		584.63	539.12	288.25	231.25	706.99	602.49	264.62	252.64	163.1	89.27	37.01	19.12	57.98	10.51	45.54	21.87	12.45	10.49	39.84	18.69	26.48	25.08	23	24.67	26.58	19.42	16.24	14.2	20.97	28.28	31.57	16.88	38.99	29.07	23.59	43.49	86.87	79.6	27.33	74.41	185.27	158.95	300.52	257.5	356.2	100.6	105.24	335.34
VIM		587.14	991.79	837.6	717.48	1107.34	740.33	952.05	740.37	701.04	624.9	908.31	356.84	389.29	851.63	569.2	822.7	1002.62	781.51	1391.01	1272.14	248.95	1257.23	1187.61	660.68	1279.25	1445.9	1177.44	1306.07	1195.57	1277.53	903.77	1343.59	1666.58	999.76	1835.49	1035.83	968	1292.52	803.45	1041.72	1053.7	1019.18	1388.9	825.23	1253.08	1354.93	1197.13	1269.68
b2m		657.39	457.75	644.22	260.9	490.96	380.17	693.19	747.39	477.85	717.48	575.85	471.54	596.35	683.4	643.2	696.16	910.55	890.86	820	672.83	434.34	1332.48	1003.61	907.41	1276.57	1648.93	1323.61	771.34	763.49	1102.74	738.01	764.17	886.7	1219.42	892.97	782.8	719.8	674.69	737.87	887.18	845.27	729.32	690.39	750.77	975.75	1054.24	994.1	874.21
gapdh		1701.19	996.87	2329.49	7056.23	1883.93	1578.48	1756.69	1375.47	947.12	1163.83	995.5	1178.86	1267.25	904.2	1411.63	1016.63	1444.04	1417.74	1155.3	1274.63	1112.34	808.89	1124.88	1206.22	1034.18	955.11	970.37	979.55	897.73	1056.47	1116.89	1532.19	940.95	1077.29	1325.9	1087.23	930.77	1205.34	934.63	1030.28	880.01	729.32	722.88	772.49	877.79	1229.83	1100.5	795.57
POS_D		1316	1162	2020	1390	1787	846	1790	1255	386	841	1280	1246	991	479	689	1079	1636	1110	1624	1192	1103	1317	1052	1466	1839	1207	1248	1304	1334	1478	1051	1685	1648	1142	1297	833	1021	916	1329	945	870	944	738	1647	1435	1685	1866	1643
Eln		1186.82	1627.55	1302.77	753.06	2539.92	1914.18	1291.45	982.48	703.9	591.83	1024.99	917.6	1250.69	413.55	694.43	776.45	1752.17	1448.54	919.6	1130.1	492.61	793.22	2111.76	1488.58	1342.41	879.19	1153.08	2844.01	2672.2	1814.76	2466.62	3731.43	3709.55	2388.78	5493.5	3771.69	3474.88	3142.22	3612.81	4836.58	4029.53	2935.98	4191.08	3394	4334.25	5805.84	4133.35	5987.61
AGER		2225.59	1703.84	2030.26	1316.37	3086.36	3001.33	2162.97	2473.74	2437.91	2969.09	2876.11	1994.51	1855.33	1857.46	1417.32	1941.5	2300.57	2255.49	2270.77	3111.2	1520.2	2323.22	2521.57	2719.47	1846.21	1754.86	1798.64	2706.77	2634.45	1580.84	2225.88	2931.14	3451.85	4525.59	2984.44	3024.47	3661.04	3991.26	2164.41	2827.54	2211.61	2973.38	3273.26	2978.28	3036.65	2958.25	3160.8	3420.5
POS_C		5686	5697	8874	5617	7327	3962	7277	5950	1572	4105	6413	6108	4952	2188	3528	5280	6335	4814	7097	5688	5230	6225	4816	6407	7608	5486	5633	6081	5869	6393	4984	6443	6637	5667	4986	3537	4366	4456	5408	4397	4158	4631	4050	6467	5749	6293	7460	6696
actb		8947.54	9063.4	8562.4	4370.12	9603.27	10540.2	8241.29	8126.51	9751.65	9922.32	12243.4	8946.6	11115.4	10997.5	8333.15	11414.5	9899.55	10802.1	9338.71	11424.3	9926.35	10330.6	18219.7	18984.2	8457.08	10373.8	10791.9	12686.8	12681.4	10042.9	12139.7	11374.9	17432.2	14072.6	12118.3	15486.1	12664.7	12273.2	9810.88	12706.8	11498	13445.7	16179.5	14097.2	12430.3	11963	11677.8	11806.4
SFTP-C		10578.5	13106.8	12606.7	7245.97	14710.7	11111.6	15373	12551.2	14847.8	11644.9	11671.3	8150.07	8539.47	14600.3	11270.2	10900.8	12050.2	10553.5	15420.6	11718.4	4364.63	12221.2	14912	12947.7	13513.4	11669.6	13163	16505.6	15945.1	12379.4	12494.9	18429	17666.1	16440.4	17794.6	16553.5	12627.5	13110.9	16648.4	18304.6	17542.3	17681.3	19477.1	14633.9	16469.4	19251.1	17092.9	15488.2
POS_B		19090	20720	28605	18618	23897	14402	24291	19859	5097	14488	21443	20365	17118	6603	12398	17753	21288	16422	23812	18871	18091	20519	18037	22995	25241	20313	21153	21740	21265	21956	17076	22481	23276	20377	16551	11988	14902	15093	21513	15093	15105	15768	13809	24590	21252	22787	23086	24563
POS_A		39430	36633	81652	45842	60105	26722	66565	38160	9935	27281	37038	44654	36746	14058	23580	31493	53181	35176	60923	34570	34024	36302	43425	53865	74702	46418	49893	50796	49384	52841	35107	67682	58300	34819	46364	26324	33037	32624	55443	33318	32558	33934	30238	63877	54269	72043	59864	62990
[truncated: 32 more columns]

## Sheet: AVERAGE FOR EACH TIME POINT
	P0.5	P1	P1.5	P2	P2.5	P3-a	P3	P3.5	P4-a	P4	P4.5	P5	P5.5	P6	P6.5	P7	P8	P8.5	P9	P9.5	P10	P10.5	P11	P11.5	P12	P12.5	P13	P13.5	P14	P15	P16	P17	P18	P19	P20	P21	P22	P23	P24	P25	P26	P27
NEG_H	2	6	1.5	2	2	1	1.33333	2.5	5	4.5	2	1	2	6	2.5	2	5	4.5	1	2	1.5	2	1.5	1.5	8	2.5	2	3	1.5	3.5	2	2	3	2.5	2	9	5.5	4.5	5.5	6.5	10	6
NEG_G	2	5	3	2	3	1	1.33333	2.5	6	6	2	2	1.5	10	2	6.66667	2.5	4	1.5	2	1	4	4	4.5	5.5	2.5	2	3	6	5.5	3.5	5	6	3.5	3	7	5.5	5.5	6.5	5	9	8.5
NEG_D	5.5	5	5.5	3.66667	3.5	8	4.33333	1.5	6	5	3.5	4.5	5	13	5	5	2.5	5.5	3	3.5	2.5	5	1.5	2.5	5	4	5.5	5	2.5	5	6	3	5	3.5	5	7	2.5	5	3.5	5.5	6.5	4.5
NEG_C	4	8.5	3.5	5.33333	4.5	3	3.33333	5.5	16	10	2.5	6	5.5	3	2.5	4.33333	4.5	5.5	6	4.5	3	5	3	4	9	3.5	1.5	6	8.5	3	5.5	2.5	7.5	4	7	3	7	5.5	12.5	6.5	5.5	7
E2F8	5.055	4.34	1.8	2.45667	2.595	6.37	6.05	6.61	6.84	5.875	2.285	4.22	5.155	3.9	2.915	5.23	5.75	2.505	4.335	5	5.595	23.16	27.435	3.735	4.415	3.555	9.965	3.37	3.86	4.415	7.16	3.97	1.385	2.765	1.81	3.95	1.87	4.21	2.29	2.48	3.705	2.88
MMP7	7.595	14.76	4.12	4.52	2.28	6.37	9.55667	3.345	2.81	2.3	3.945	10	3.46	1.22	3.795	6.08667	10.34	3.275	2.565	6.895	5.595	11.58	13.41	2.185	2.86	5.87	6.76	3.37	2.75	6.94	7.16	4.88	1.725	2.765	3.62	2.37	3.715	5.6	1.875	3.095	1.905	3.82
MUC5Ac	3.8	9.135	7.47	12.0333	3.225	6.37	6.05	3.56	18.24	16.26	2.285	6.865	6.595	4.15	4.945	6.26333	4.79	5.815	3.745	8.1	5.595	23.16	16.86	3.46	3.3	9.34	8.365	4.49	8.83	3.79	7.16	6.535	2.025	6.55	7.25	7.1	3.715	3.845	2.55	2.12	3.04	3.21
KRT5	7.595	21.995	3.43	4.25333	4.165	6.37	6.05	4.1	5.61	4.48	3.945	6.865	3.785	1.46	4.945	6.08667	4.05	7.39	3.745	5	41.12	11.58	8.735	3.46	2.11	7.025	6.76	3.37	4.4	3.79	12.865	5.33	3.715	2.765	4.23	2.37	7.865	2.455	7.01	3.16	3.04	2.88
MCPt4	15.155	10.115	8.395	7.37667	3.535	12.74	12.1067	4.635	4.91	4.8	5.19	13.73	10.315	2.68	3.795	6.62667	6.46	6.665	7.285	5	11.32	11.58	8.735	3.735	1.795	14.305	6.76	1.12	5.51	5.05	10.01	6.73	1.645	8.225	2.42	3.95	4.645	7.73	1.55	1.23	2.475	2.205
ubc	11.36	8	5.845	5.71333	3.225	6.37	7.22	7.84	7.19	4.6	7.06	4.22	6.595	7.07	3.795	10.9567	4.42	4.97	4.335	5	8.46	11.58	8.735	6.005	5.3	4.715	8.365	3.93	4.4	10.1	11.47	11.61	4.72	6.405	8.46	7.1	5.52	14.355	7.39	8.95	6.665	7.485
NEG_B	10.5	7.5	4.5	4	8	4	4.66667	6	9	7	6	8.5	7	9	7.5	7.33333	11.5	9.5	3	5.5	5.5	5	4.5	10	6.5	7.5	7	7	7	4	9.5	10.5	9	11.5	6	16	8	7	9	13	9.5	11.5
KLra4	6.34	9.81	4.54	4.01333	6.215	25.49	12.4233	3.345	1.75	1.545	9.13	13.73	2.415	1.22	10.77	10.64	2.495	4.08	3.745	5	14.185	46.32	8.735	3.46	1.545	17.855	6.76	1.68	7.69	3.155	22.875	6.73	3.11	11.86	2.42	5.52	3.235	12.27	3.075	2.365	3.705	2.88
NEG_A	6	11.5	5.5	6.66667	6.5	11	8	8	9	7	9	6	5	9	7	11	7	8	7	6	6	5	6	7.5	12.5	7	9.5	10	7	11	6	8	9.5	10	8	12	8.5	7.5	13	10	12	6
SNAI1	5.055	10.42	2.66	3.08333	6.045	6.37	6.05	10.155	8.59	6.525	5.19	4.22	9.665	7.07	3.795	6.94333	9.645	6.7	5.515	5	8.46	11.58	16.86	6.28	17.3	12.975	11.91	28.63	4.4	11.365	14.32	17.085	4.8	5.605	13.9	15	9.245	3.845	14.995	9.275	3.805	3.785
AMACR	15.225	16.2	3.43	7.09333	2.91	25.49	20.2833	12.1	2.28	1.92	10.38	5.785	6.53	3.17	10.505	11.63	9.595	9.77	8.085	11.205	17.045	34.74	12.795	4.095	2.055	3.555	13.515	3.93	6.045	5.675	10.01	20.545	3.255	6.475	3.02	1.58	5.085	11.575	5.36	2.97	2.57	3.105
NEG_E	7	9	8	8.66667	9.5	11	5.66667	6	9	9.5	10.5	7.5	12.5	9	6	8	12.5	12	6	5	5	5	8.5	9	13	12	8	14	11	7.5	7	7.5	16	9	8	13	12	13	14	12.5	10	11.5
C/EBP	12.65	26.485	10.4	11.3967	12.175	6.37	6.05	6.965	11.05	11.105	8.095	10	5.155	10.97	10.24	6.98667	20.85	16.31	11.035	5	11.32	11.58	8.735	3.735	9.15	7.025	13.515	6.74	12.655	8.835	10.01	9.555	13.59	6.475	9.67	11.84	10.7	5.6	11.775	10.17	12.355	9.045
Ctnna2	18.95	18.335	5.92	13.95	13.45	12.74	9.34333	4.46	6.31	4.94	17.225	21.57	9.99	1.95	6.71	7.12	8.585	11.545	7.495	8.1	11.19	23.16	30.885	8.115	3.205	5.87	25.42	5.61	17.595	13.26	20.025	7.64	5.32	15.645	7.85	5.52	8.305	16.48	7.165	4.245	5.885	3.175
Kcnma1	19.055	4.49	9.615	9.00667	7.3	6.37	8.38667	18.375	17.89	16.31	19.095	16.375	30.76	11.7	6.71	12.7133	21.515	13.16	12.625	14.305	5.595	34.74	20.92	2.185	4.63	7.025	31.84	3.37	11.55	6.31	18.63	6.885	3.715	4.585	2.42	3.95	22.205	7.73	3.75	4.965	1.62	2.32
ALDH1A2	25.26	27.855	29.89	14.7233	24.83	6.37	8.38667	8.76	17.01	16.65	15.98	16.27	11.105	7.07	11.65	11.99	17.74	8.235	4.925	11.205	25.63	23.16	13.41	2.185	8.86	4.715	8.365	5.05	7.72	6.315	12.865	14.22	9.095	2.765	9.67	5.52	6.525	9.77	2.55	8.665	4.47	2.845
NEG_F	13	14	10.5	12.3333	9	8	9	11.5	15	11.5	11	19	16	11	9	13.6667	10.5	13.5	7	11.5	7.5	10	7	14	13	14.5	16.5	11	11.5	12	12	15.5	11	15	14	18	18.5	19	11.5	13	14.5	11
FOXD1	11.395	12.405	4.98	13.76	6.44	19.12	18.5833	16.38	3.86	3.155	21.375	21.675	6.595	3.9	3.795	18.1267	13.985	5.735	16.58	21.885	11.32	34.74	18.085	7.835	3.965	5.95	11.57	9.54	15.44	8.835	24.4	8.845	6.825	12.805	9.06	4.74	8.345	19.305	8.215	6.42	4.575	7.555
MMP-3	22.785	37.87	11.415	10.47	9.44	12.74	10.9367	15.305	5.79	4.79	10.17	5.785	4.505	2.68	4.945	14.61	12.41	14.05	2.565	8.1	17.045	23.16	21.535	4.73	6.57	8.18	18.67	14.6	12.12	9.465	38.725	11.11	10.035	9.315	9.06	10.26	7.405	12.555	18.635	10.065	15.125	11.225
PTGS2	31.635	8.76	19.935	9.75333	11.545	31.86	15.7167	16.94	8.24	9.14	3.53	17.835	7.575	4.39	5.56	18.5267	13.195	11.51	4.545	9.995	13.79	34.74	20.92	6.28	10.06	8.35	14.78	11.79	7.72	22.08	10.01	9.75	14.875	16.59	29	22.89	11.135	22.085	14.81	12.315	29.57	24.775
Nol3	8.82	37.715	4.81	10.4167	3.535	25.49	24.2133	3.92	4.91	4.24	9.755	8.92	12.405	4.15	9.62	25.9267	5.6	13.32	12.035	21.2	5.595	23.16	12.795	22.505	6.55	15.46	11.91	7.3	7.18	15.785	10.01	14.475	8.515	18.34	9.67	15	10.18	12.595	16.05	12	14.275	10.865
Thy1	8.85	47.99	12.525	9.72667	7.07	19.12	14.2333	10.155	13.5	16.125	6.435	5.785	13.775	8.05	9.975	8.97	6.685	8.28	10.445	6.895	5.595	34.74	17.47	14.115	9.45	16.53	14.78	14.03	19.24	18.935	12.865	18.445	13.11	9.245	12.08	18.15	26.005	9.77	17.06	16.595	22.045	21.24
HPGDS	29.06	22.605	11.185	28.1433	24.37	31.86	25.1667	13.02	10.87	11.685	16.605	15.3	10.385	7.8	14.035	19.79	12.41	11.545	6.315	17.575	13.925	57.9	17.47	11.57	5.82	5.87	16.72	7.3	8.8	9.47	18.63	16.48	9.895	5.605	8.46	11.05	7.44	16.11	7.165	6.96	5.325	7.36
Acta2	15.155	44.03	13.215	19.88	18.93	25.49	22.62	26.73	12.63	10.78	23.865	14.7	27.295	14.14	10.855	24.4367	14.41	17.28	15.785	20.68	14.05	34.74	12.795	15.95	10.695	5.87	28.63	6.17	9.935	10.095	24.335	9.75	5.66	12.15	12.08	3.95	7.875	5.97	5.135	5.4	6.08	5.68
kcne1L	22.75	42.05	8.75	20.5867	9.035	38.23	28.46	13.535	6.66	6.9	18.885	15.785	16.515	7.8	15.71	24.3033	18.895	22.485	14.985	8.79	27.715	46.32	26.21	9.385	6.21	11.735	26.69	5.05	22.535	10.73	27.185	11.005	4.7	10.99	11.48	3.16	11.545	24.535	8.14	4.18	9.61	7.78
ITGax (CD11c)	16.41	10.27	5.06	9.91667	8.095	25.49	17.0967	16.225	8.77	7.845	10.17	6.865	8.945	9.02	11.65	15.4667	12.14	14.98	14.015	31.195	30.19	23.16	22.145	11.65	15.41	11.735	45.355	16.84	17.65	13.255	41.575	16.785	16.04	14.845	10.27	20.52	22.7	22.7	16.42	23.645	23	16.42
Wif1	8.85	18.335	9.005	11.8233	14.14	25.49	19.1167	21.065	18.24	18.16	29.475	12.055	13.45	15.36	20.48	31.42	25.14	32.06	32.535	22.575	19.905	69.47	33.715	24.415	19.84	18.84	16.385	15.72	18.165	18.925	24.4	13.12	7.57	9.245	3.62	11.05	6.96	5.97	8.215	4.495	6.175	4.72
Sox9	27.805	28.685	24.365	21.3167	13.83	44.61	29.4167	20.325	15.08	14.795	19.095	20.485	19.005	10	15.18	15.8267	21.66	10.9	14.185	18.785	33.565	46.32	17.47	11.295	10.885	12.975	11.57	8.98	11.04	4.415	60.275	9.6	8.59	19.14	9.67	3.95	18.085	11.575	6.6	4.605	7.71	2.325
RAGE	37.875	38.58	36.12	32.4633	23.975	44.61	41.95	19.43	20.52	20.415	22.83	14.215	33.105	8.29	16.33	22.9933	22.965	19.905	12.21	18.095	19.39	46.32	8.735	7.2	7.31	7.025	23.48	6.17	24.805	16.395	27.185	13.01	7.01	13.83	12.69	9.47	11.135	6.99	10.05	10.08	11.975	6.615
ITgam (CD11b)	26.58	19.25	15.36	20.41	14.14	6.37	21.7667	22.275	16.84	16.79	10.175	30.595	23.51	25.36	18.095	25.88	11.495	15.665	18.35	20.68	30.965	57.9	34.945	13.76	14.405	16.53	19.93	7.3	26.99	11.36	24.265	14.43	17.005	25.1	20.54	18.94	12.905	26.585	22.01	22.345	19.02	36.655
MGAT4A	34.11	38.8	19.48	28.1833	16.105	19.12	23.2567	18.175	10	10.58	16.605	31.675	12.805	13.41	17.21	27.4567	10.88	16.55	9.855	20.68	27.845	81.05	16.86	10.66	10.02	21.155	9.965	11.23	25.345	13.25	21.415	20.305	14.855	36.02	21.14	15.78	28.755	25.235	18.935	11.45	19.195	10.14
F13A1	51.88	47.835	28.44	45.0033	34.35	70.09	48.1067	14.295	18.06	18.96	20.135	30.975	15.145	9.27	13.15	27.1833	17.39	12.395	8.465	20.68	19.65	46.32	16.86	10.66	14.37	7.11	16.72	15.72	11.58	15.155	22.875	19.095	10.295	22.925	19.33	15	24.49	23.76	20.66	16.89	11.985	35.04
ERB	17.695	44.885	12.97	24.45	17.215	70.09	35.15	17.995	9.29	7.325	25.32	11.565	22	10	13.415	34.72	20.255	14.855	9.855	9.995	33.825	23.16	16.86	6.64	11.77	19.915	41.805	11.79	12.095	21.455	54.505	35.58	22.325	20.085	20.54	18.15	25.55	33.945	16.575	17.515	20.835	19.205
NME7	25.325	28.925	37.865	42.0067	28.22	31.86	37.7	20.73	32.44	32.845	28.025	29.405	18.355	19.02	18.625	19.7067	32.095	25.395	21.47	54.46	25.37	46.32	8.735	17.295	22.435	20.085	8.365	19.09	24.235	15.765	25.725	22.67	21.3	15.79	19.94	16.57	20.32	12.885	17.17	19.33	22.065	19.95
Claudin 1	48.01	43.835	49.34	42.44	24.43	44.61	39.5067	23.53	18.41	18.245	18.68	23.73	21.025	15.12	10.855	30.6133	21.705	10.82	21.125	12.58	27.975	57.9	17.47	20.755	18.255	29.505	29.895	27.51	41.835	21.45	12.865	24.38	22.865	25.975	25.37	18.15	25.465	19.63	19.8	17.205	22.725	17.95
RARA RARBRARG Retinoic acid receptors alpha beta gamma	6.31	24.365	29.86	11.1567	16.65	19.12	11.47	19.83	29.64	29.55	24.91	10	28.015	23.17	16.945	27.8167	31.925	29.23	25.22	13.785	33.565	11.58	17.47	19.13	48.59	23.465	40.78	43.79	16.545	36.6	44.36	18.61	25.395	14.845	46.52	36.3	36.96	18.485	53.84	33.595	24.64	31.575
Serpina3	34.11	39.19	22.52	14.9767	12.655	31.86	20.39	19.785	12.45	13.7	22.21	27.84	22.725	11.95	13.77	32.0567	12.58	27.375	17.93	29.985	38.905	69.47	34.33	32.61	13.375	22.31	46.275	26.94	23.13	29.025	55.83	41.86	24.575	31.65	25.98	39.46	23.145	32.1	24.145	25.01	18.83	19.6
ABCG2	25.225	42.295	36.99	37.9633	21.895	19.12	18.16	35.02	47	46.26	30.51	23.135	18.68	52.43	12.005	18.5333	34.32	28.38	23.655	21.885	19.515	34.74	16.86	17.655	46.835	17.515	17.985	26.38	22.055	27.75	42.9	23.44	37.22	13.97	44.71	35.51	34.69	18.855	39.37	33.9	34.34	33.075
PCYOX1	40.45	27.635	33.4	21.8967	33.24	57.35	39.5067	38.005	29.81	31.865	29.685	38.92	19.4	26.82	28.95	26.9233	26.2	35.165	35.87	41.355	14.05	34.74	24.98	36.145	24.395	32.715	26.69	21.89	43.565	19.57	45.815	24.935	26.48	27.725	21.75	39.46	31.875	23.11	22.16	28.405	33.77	23.285
MUC5Ab	27.805	39.36	13.06	51.1967	9.44	286.75	247.327	10.155	214.48	203.31	16.815	4.22	23.835	4.15	6.71	11.4533	11.52	14.13	6.315	8.79	22.51	23.16	8.735	2.82	5.28	4.715	9.965	17.96	2.75	9.475	15.78	9.145	5.36	10.19	15.1	5.52	10.16	8.055	5.585	7.9	5.425	6.335
EPHA7	30.41	60.705	35.715	32.4133	37.005	38.23	36.2133	37.465	37.88	38.915	42.345	32.05	27.765	31.7	38.485	43.4233	50.325	28.02	32.33	46.875	33.955	34.74	42.455	20.955	22.32	21.155	35.39	20.21	33.035	33.45	34.345	28.345	25.795	37.04	21.75	22.89	24.085	42.74	20.36	21.97	23.01	18.52
LRAT	27.87	21.605	11.915	13.4933	8.41	19.12	10.3	33.995	5.96	5.435	22	15.3	15.22	6.1	12.005	19.4267	9.99	14.935	7.285	23.095	27.975	92.63	25.595	18.495	9.81	9.34	21.535	11.79	22.535	28.4	64.45	35.38	22.265	49.775	29.6	41.04	31.95	235.57	62.915	87.67	40.715	30.54
IGF1	26.58	34.48	25.15	44.6567	34.75	25.49	23.3667	56.135	41.91	39.365	38.405	23.62	40.17	48.28	53.4	56.63	37.055	37.91	42.185	49.455	67.78	104.21	26.21	22.865	41.935	41.24	29.55	20.21	26.45	19.56	47.275	25.98	12.33	14.845	17.52	9.47	18.54	17.835	15.595	12.305	15.98	11.055
GUCY1A2 sGC(soluble guanylate cyclase) (PMID 23934926)	31.535	52.965	27.735	29.2233	21.75	12.74	8.17333	25.185	23.68	22.885	31.135	23.62	41.725	38.77	18.975	47.0733	26.79	41.58	42.39	27.405	27.715	104.21	32.11	38.61	45.86	43.55	31.5	48.84	51.23	55.525	54.37	49.16	41.295	27.725	45.31	26.83	36.62	38.44	42.405	32.685	31.09	28.42
Shisa3	25.225	58.33	22.815	37.19	32.555	31.86	45.24	56.42	49.98	51.325	72.04	63.13	68.05	41.94	36.805	85.1267	60.045	36.575	35.695	31.36	33.44	127.37	36.17	25.49	20.815	39.095	19.93	11.79	32.47	25.24	17.175	19.7	16.22	23.285	12.69	12.63	15.805	27.32	13.01	14.475	15.225	14.34
PRIM2	53.17	34.195	35.715	41.46	25.545	89.21	71.0433	53.33	41.56	42.76	38.19	48.54	34.87	35.85	40.865	40.4933	43.57	30.605	32.92	50.665	30.835	34.74	37.78	35.99	30.05	22.23	49.825	23.02	35.845	25.24	37.265	24.285	20.635	36.09	26.58	33.94	27.33	18.855	32.77	26.3	31.66	25.66
TTF-1	27.735	68.92	36.375	46.8033	33.465	25.49	26.1267	29.44	41.39	41.895	28.64	37.46	19.4	32.68	19.86	39.6767	38.905	33.59	39.44	38.255	33.7	34.74	48.355	38.815	36.23	39.825	53.375	33.12	42.97	41.025	31.495	52.22	47.035	45.265	49.54	33.94	42.155	37.465	46.87	33.205	35.66	28.82
EPHA3	75.715	98.985	93.645	92.21	91.565	76.47	61.49	92.925	47.18	50.59	35.5	56.86	47.205	37.55	45.545	42.61	42.705	19.095	33.715	14.305	11.19	81.05	12.795	19.48	19.785	22.395	45.355	20.77	23.13	17.68	28.575	29.3	18.07	20.3	19.94	13.42	18.55	18.855	12.635	18.96	20.66	13.525
THTPA	51.74	47.19	52.88	38.25	58.61	44.61	43.12	59.405	48.05	44.22	57.08	37.35	48.72	41.21	28.685	54.5133	45.96	44.125	38.85	31.36	55.95	46.32	16.86	42.91	40.085	52.885	41.805	43.22	43.54	46.06	32.955	56.79	30.33	44.32	33.83	37.88	41.205	39.875	34.23	35.265	29.945	27.1
tbp	41.775	37.21	30.36	35.1733	24.83	57.35	52.8867	36.93	26.13	25.115	39.44	42.16	17.96	42.92	37.07	46.1733	35.895	34.72	38.055	40.15	53.085	34.74	78.625	52.93	26.265	50.66	56.92	32.56	56.22	47.96	68.625	46.99	48.32	51.885	35.64	48.14	45.835	52.845	36.78	43.38	52.84	41.49
hprt	45.54	51.595	39.52	33.2167	26.31	31.86	32.9233	36.41	36.65	34.505	66.215	28.915	51.135	34.38	55.255	51.1767	38.61	61.245	45.545	68.765	59.07	81.05	58.085	49.905	35.985	43.295	57.265	44.91	47.34	41.025	47.275	49.405	24.21	36.09	33.83	37.09	35.65	59.175	31.835	33	31.935	29.685
Claudin 3	87.14	66.78	85.525	60.0867	57.22	57.35	56.0733	39.26	53.66	50.82	35.08	36.27	50.69	32.43	50.755	52.7533	38.165	55.47	57.37	34.465	27.715	46.32	59.31	30.7	31.25	53.14	25.085	57.26	48.505	42.28	38.59	42.425	39.665	39.07	73.7	38.67	35.145	39.915	36.405	38.73	41.64	34.755
P4HA3	36.685	15.76	28.39	27.1233	31.585	19.12	35.0467	48.915	42.79	45.945	68.085	52.54	88.49	41.21	40.605	79.3667	96.16	122.85	82.175	95.48	98.235	115.79	110.12	54.36	82.86	87.185	47.875	41.54	44.105	22.71	15.715	18.19	8.875	19.21	10.27	12.63	1.855	12.595	10.8	7.39	9.795	6.775
Dnmt3a	70.735	44.24	66.625	41.4867	52.315	76.47	45.0333	49.61	45.77	48.55	48.16	35.785	56.755	43.89	44.665	57.93	46.28	54.74	73.57	38.775	67.395	69.47	61.155	64.735	47.005	62.56	56.24	57.82	47.37	64.375	68.76	58.055	40.795	33.4	44.1	37.09	34.28	32.23	38.09	26.085	22.345	21.85
ABCD1	51.74	34.785	119.645	42.27	38.17	50.98	52.3533	32.67	49.46	49.945	48.99	32.05	52.365	34.14	41.13	60.1033	44.26	63.305	43.15	46.355	58.94	69.47	42.455	53.645	36.98	55.365	43.41	49.96	57.305	39.765	78.635	68.15	45.79	48.17	50.75	46.56	43.055	49.285	48.93	49.42	35.655	48.49
CD68	35.335	35.33	45.125	81.1767	51.375	114.7	77.1	45.37	58.93	57.585	40.06	36.375	41.47	51.45	46.955	39.4067	41.645	34.115	35.9	37.045	36.43	46.32	30.27	31.135	66.16	41.24	47.3	34.8	64.48	47.98	51.52	45.595	48.24	61.2	54.98	71.03	55.645	74.76	70.56	101.665	84.58	78.095
CTPS2	92.295	43.02	54.7	57.5567	38.17	108.33	70.5167	56.04	47.35	47.22	48.16	69.405	49.765	35.6	33.275	57.31	49.86	53.975	42.945	58.25	58.42	34.74	51.805	52.53	43.745	57.68	51.085	37.05	66.075	56.15	91.7	60.56	43.46	55.74	51.35	52.88	56.065	63.925	52.155	44.905	42.13	43.465
EGFR (Epidermal growth factor receptor) (PMID 22916088 22245996)	167.23	64.51	88.75	99.2233	123.655	76.47	98.5533	120.025	54.89	54.67	129.765	97.03	59.825	37.8	42.895	56.9933	63.745	116.08	48.67	61.35	56.075	46.32	57.705	46.325	89.08	64.615	46.275	55.57	96.79	130.15	93.025	42.67	62.415	32.24	60.41	48.93	131.53	46.83	51.44	45.985	131.055	165.91
Robo1	74.525	66.39	65.44	55.5867	48.295	95.58	62.7633	78.265	72.78	72.32	109.385	102.535	63.145	71.45	59.58	69.8867	95.47	63.825	80.615	85.13	67.655	46.32	38.39	47.595	52.45	49.165	58.185	54.45	69.445	38.505	38.59	46.385	42.2	24.23	38.66	26.83	24.94	25.52	24.26	24.045	35.005	24.66
hmbs	74.525	61.525	69.025	73.7633	69.87	57.35	55.2233	67.29	63.66	66.645	75.35	65.19	56.685	73.16	59.58	52.71	73.145	54.58	61.47	70.66	55.95	81.05	44.295	44.895	55.295	54.13	46.275	42.66	84.21	50.49	70.15	60.66	35.835	49.775	50.14	38.67	40.35	36.4	42.405	39.595	34.42	48.75
PHGDH	61.85	354.6	75.695	76.3167	36.63	63.72	50.6567	58.955	56.12	47.81	41.515	52.65	46.3	40.24	30.275	45.2267	58.69	30.28	37.605	47.045	30.835	46.32	51.805	47.085	39.24	31.65	44.67	45.47	34.71	28.4	51.52	57.15	33.585	28.525	50.75	26.04	39.765	47.975	44.39	32.315	39.78	33.975
Claudin 7	49.2	56.275	59.645	54.25	44.215	70.09	64.5633	44.28	56.82	54.63	52.515	42.54	96.785	37.07	36.545	68.4867	62.12	100.53	80.475	45.665	85.875	104.21	55.25	62.87	50.325	63.8	48.22	67.92	45.725	48.6	77.31	57.995	34.93	34.415	53.77	44.99	37.985	60.855	62.69	37.43	44.805	32.915
GUSB	79.545	46.53	63.265	75.13	90.995	63.72	52.1433	85.325	68.75	67.74	57.7	64.215	51.925	56.82	45.9	58.48	52.305	53.615	58.965	79.965	64.405	34.74	78.625	55.91	60.25	63.72	73.64	59.5	72.685	57.415	28.645	58.86	50.67	64.035	51.96	48.14	44.945	47.85	43.905	50.43	48.67	60.015
Lrp2	27.805	35.005	28.17	42.5133	41.31	70.09	55.1167	30.675	40.51	38.775	18.27	30.485	38.405	33.9	34.16	49.6867	55.04	45.66	41.625	24.99	52.83	11.58	63.985	47.84	58.155	48.26	61.05	49.4	35.225	61.855	91.565	85.69	78.955	78.735	146.2	78.92	107.36	129.4	119.98	113.26	105.91	105.285
pgk1	53.135	68.37	60.05	51.8333	46.58	76.47	77.5267	42.325	59.8	59.69	54.39	55.89	78.69	57.55	74.055	72.01	75.17	56.6	55.78	62.56	63.89	104.21	48.355	69.035	61.425	78.92	79.375	61.75	45.24	49.835	67.3	42.47	39.85	37.11	59.81	47.35	58.785	55.375	49.645	44.285	45.375	42.15
NFATC3	97.21	85.91	73.675	74.39	84.41	70.09	73.91	75.355	50.86	54.665	88.01	57.73	55.965	68.52	57.55	45.8567	71.49	32.3	68.61	73.24	47.365	57.9	24.98	54.79	63.5	57.765	55.66	54.45	74.93	65.02	67.235	54.195	61.33	54.865	64.04	80.5	64.29	57.295	58.53	60.025	58.37	49.705
Src	50.39	55.355	67.225	31.8567	42.11	63.72	56.4967	32.2	69.27	63.87	42.14	40.97	52.505	57.31	43.87	82.0233	70.14	77.555	64.63	72.555	53.86	115.79	25.595	76.825	78.66	81.065	41.46	88.13	60.625	68.8	104.43	77.205	71.91	58.72	87	73.4	67.105	62.615	79.34	52.865	53.345	41.055
FSP1 (S100a4)	54.285	91.085	50.75	56.15	37.09	50.98	54.16	48.555	51.74	51.535	51.06	33.73	68.44	67.3	36.455	55.5067	54.005	46.345	51.235	37.565	72.86	81.05	75.18	56.03	96.3	50.32	74.91	56.14	54.575	59.95	83.015	74.845	72.35	71.885	79.75	81.29	65.25	64.62	95.57	109.455	60.405	142.575
Epcam	98.635	107.2	103.63	87.9233	70.76	82.84	79.7567	89.745	76.81	76.01	70.99	61.35	61.45	54.62	43.87	57.3967	77.955	48.93	63.27	64.62	61.28	104.21	58.085	55.83	57.02	63.55	69.415	73.54	42.97	69.42	64.315	46.35	55.19	51.01	77.93	59.19	51.4	48.59	67.34	58.925	67.305	49.41
ipo8	55.575	73.21	78.72	68.3067	58.785	70.09	65.7333	53.6	72.78	79.015	88.22	69.295	71.435	59.74	42.72	68.1733	80.25	65.97	73.745	59.97	58.81	92.63	66.44	56.19	59.315	70.74	49.825	64.56	77.65	62.46	58.615	83.03	66.35	88.85	73.1	51.3	60.2	65.025	57.93	61.915	62.35	66.705
FGF18	53.17	49.155	51.55	41.0867	52	38.23	42.16	71.77	71.9	75.005	88.645	62.055	57.8	79.01	63.64	90.63	123.2	144.535	141.67	108.91	66.62	196.84	97.705	93.885	123.135	95.45	81.905	55.57	87.53	58.69	41.505	43.52	21.8	27.865	35.04	16.57	31.08	25.15	30.56	25.995	16.75	16.335
POS_F	56.5	88	65	61.6667	58.5	73	48	43.5	76	71.5	70.5	70.5	66.5	91	68.5	67	63.5	77.5	53.5	49	59	54	52	67.5	94	78	66.5	88	69	51	60	73.5	67.5	71.5	79	96	90.5	86	106.5	97	76	66
NME3	53.065	90.93	59.645	49.8033	41.54	101.96	75.6167	35.715	66.12	67.09	56.665	48.43	72.485	43.65	44.31	80.84	81.83	81.31	79.64	64.455	84.175	81.05	110.12	67.76	73.05	88.51	90.95	92.06	81	72.57	81.485	75.5	72.455	74.95	83.97	68.66	80.115	60.16	77.16	69.58	60.405	60.275
N-Cadherin(CDH2)	60.625	69.785	72.815	61.83	56.48	44.61	72.96	94.585	124.34	124.32	88.01	93.025	131.005	87.79	80.585	110.787	135.535	112.765	124.565	83.235	84.695	196.84	87.36	88.47	107.065	59.91	65.285	78.03	94.74	80.165	87.325	40.685	64.58	64.76	54.37	53.67	42.66	46.215	38.015	36.445	41.065	45.3
LFNG (Lunatic Fringe) (PMID 19897741)	68.225	84.955	68.63	61.79	71.835	50.98	67.1167	56.845	89.62	81.185	102.325	71.355	84.63	89.01	69.2	113.487	102.63	104.08	88.04	63.415	56.335	46.32	70.505	57.895	72.035	96.515	60.71	106.66	104.05	105.39	108.875	128.07	90.035	100.925	189.09	107.33	143.96	82.205	139.625	113.42	89.575	95.365
KRT18	234.16	184.37	184.345	131.14	108.59	152.93	151.753	75.69	81.9	76.99	71.405	57.835	86.795	53.89	58.435	92.4367	85.995	88.45	71.59	85.3	59.195	57.9	87.36	73.05	52.035	72.15	36.31	71.29	62.325	61.2	103.105	62.22	56.73	77.715	100.89	81.29	106.115	84.74	76.935	77.025	73.77	55.67
TBX4	59.405	57.425	65.86	32.95	39.97	19.12	53.0967	56.485	77.69	73.435	122.05	62.54	109.77	83.15	106.535	119.52	100.34	133.715	115.275	111.495	95.5	127.37	112.34	119.05	110.595	167.43	124.39	127.43	105.24	70.055	85.865	96.705	67.87	70.435	80.95	82.08	61.5	83.965	83.72	58.03	49.285	44.58
GATA-6	139.055	102.93	140.475	127.35	123.92	70.09	99.08	89.38	111.71	118.565	117.065	96.265	96.18	92.91	103.89	85.4433	99.045	82.24	98.965	81.51	50.225	162.11	52.415	75.11	83.205	70.315	67.81	115.64	103.08	81.43	94.485	91.435	70.445	79.895	106.33	87.6	84.72	80.45	84.51	80.54	57.055	63.005
tfrc	88.295	49.82	77.845	118.967	70.5	95.58	87.6133	106.03	98.91	101.115	89.46	59.51	69.745	96.08	82.88	84.0933	107.285	78.315	100.97	112.015	105.91	34.74	57.705	75.625	126.275	78.83	65.52	101.6	87.505	112.345	88.715	124.4	118.1	86.23	127.47	111.28	107.36	97.375	114.245	119.75	108.725	89.525
BCL2A1	102.265	135.615	114.34	180.803	128.825	89.21	133.387	105.695	80.32	84.345	72.865	48.22	60.15	99.74	64.17	75.84	99.64	58.055	68.995	75.305	73.12	57.9	73.335	62.985	104.785	59.74	80.645	59.5	98.575	87.105	120.21	101.885	86.34	106.89	112.37	104.18	107.23	145.845	101.27	166.545	147.885	119.775
Igfbp3	237.795	236.97	233.38	78.05	73.525	101.96	92.0767	60.48	56.82	60.1	27.815	41.57	64.655	17.31	15.535	30.6633	44.9	49.54	48.525	26.365	56.075	81.05	82.685	66.285	41.94	71.165	99.99	135.29	67.21	159.04	216.155	81.385	117.88	126.175	183.05	164.95	153.835	168.01	150.425	100.83	90.79	124.72
GFPT1	126.34	99.635	121.825	98.4967	116.8	127.44	112.993	90.545	129.43	137.13	85.935	65.89	109.84	82.42	51.195	94.64	154.87	147.325	118.46	127.695	133.76	81.05	78.625	105.735	133.685	106.84	115.69	108.9	77.65	102.875	138.775	77.215	76.685	75.385	109.95	97.07	104.125	79.34	97.185	79.625	75.7	83.04
FOXF2	29.025	53.12	40.085	42.8633	43.62	76.47	55.33	59.245	90.67	82.155	109.4	77.35	140.74	97.05	69.025	120.027	181.6	153.495	188.395	120.8	83.925	196.84	180.39	143.945	193.74	172.305	129.545	210.51	88.155	72.565	103.035	101.94	66.99	60.035	85.18	96.28	70.305	52.105	101.495	72.655	40.79	58.37
CD38	51.845	82.275	71.235	53.9167	41.31	31.86	38.5467	49.315	67.17	66.5	59.155	44.105	64.655	62.67	47.31	62.99	101.32	119.99	119.32	54.625	86.655	138.95	90.195	87.4	103.525	128.76	127.94	131.36	109.07	178.595	207.6	178.19	136.91	143.64	123.24	202.83	113.79	173.245	170.185	135.145	122.05	93.555
SMAD3	155.295	117.23	141.54	105.743	125.01	114.7	97.0633	114.43	126.27	125.62	135.96	92.055	138.715	97.79	91.09	109.263	146.17	191.45	113.57	148.205	110.45	92.63	132.645	134.915	124.165	106.025	137.565	111.15	100.245	95.31	100.05	104.69	79.655	86.085	96.06	82.08	95.335	77.665	90.36	74.58	67.885	59.095
PRDX3	161.87	134.57	167.795	173.893	133.61	172.05	158.767	142.265	102.77	111.86	112.92	126.27	94.3	107.54	76.175	87.74	119.965	90.95	114.955	118.22	103.825	127.37	64.6	108.16	96.5	118.915	95.18	73.54	149.315	93.41	110.265	87.21	92.005	106.455	102.7	104.18	121.105	101.305	114.615	96.6	112.03	89.385
PRSS35	37.875	67.245	42.245	82.6	105.48	82.84	95.05	204.89	210.1	200.9	277.125	214.38	253.535	272.14	252.27	274.18	290.235	243.525	329.46	211.62	173.825	115.79	136.33	139.57	178.005	122.215	87.5	39.29	101.865	29.65	44.425	26.325	10.155	27.58	14.5	11.05	11.555	16.48	11.55	9.03	11.52	11.925
TST	287.975	217.85	273.85	291.537	239.835	146.56	152.287	171.42	151.52	161.565	110.84	112.645	156.28	93.88	53.49	126.877	150.455	124.225	114.155	94.775	117.615	185.27	100.16	100.88	102.125	97.675	80.98	140.9	131.125	115.51	102.97	90.635	106.54	94.67	147.41	133.38	124.025	88.05	109.255	131.695	108.375	91.16
EXT1	131.29	106.915	132.475	112.893	153.29	127.44	136.673	219.325	145.39	156.155	178.93	156.27	192.965	181.67	146.88	195.867	181.89	124.105	175.94	193.19	109.03	150.53	126.98	155.16	153.72	155.695	115.11	111.71	152.155	112.96	113.115	101.095	98.67	93.43	103.91	82.87	106.01	72.02	104.795	84.11	87.59	86.62
PDGFRb	54.32	53.985	53.63	49.8267	66.735	89.21	79.22	51.31	68.57	74.675	111.255	76.755	179.26	75.59	82	161.74	111.535	178.935	211.385	122.695	172.92	208.42	278.71	228.41	148.515	236.67	211.205	209.38	109.61	169.78	241.88	174.595	108.805	117.435	103.91	150.74	121.49	145.595	109.63	101.81	77.995	74.345
ATP1B1	264.41	328.235	381.29	168.573	154.695	159.31	119.903	89.625	109.43	112.735	78.045	78.215	88.375	100.96	76.525	101.68	125.69	90.27	111.735	66.35	67.655	162.11	83.915	70.105	93.98	83.375	75.145	136.41	82.03	133.775	153.03	156.645	238.61	181.77	264.61	146.79	226.17	134.145	205.46	187.24	270.36	192.085
DLK1	905.59	1699.07	903.04	171.983	102.86	197.54	179.367	165.165	256.22	271.045	146.74	144.97	337.605	62.91	65.23	57.08	65.645	39.965	19.495	40.84	19.775	11.58	22.145	15.95	7.56	11.905	21.875	7.3	11.58	13.255	21.415	11.31	7.845	17.465	6.04	8.68	13.475	15.415	7.8	4.72	11.32	4.515
TGFB1	144.005	82.81	174.465	142.353	144.365	159.31	149.423	154.945	140.3	144.91	145.51	138.105	226.86	141.68	140.17	155.887	153.715	199.435	171.495	153.72	171.09	150.53	147.9	187.81	192.04	195.61	134.595	217.24	184.025	236.065	246.125	190.715	169.995	179.73	187.28	212.3	199.705	133.775	226.98	160.425	156.47	179
Hist1h2ab	55.71	224.28	26.445	80.4333	72.755	127.44	198.693	457.6	339	338.545	549.695	456.92	169.915	442.11	418.13	356.783	272.99	141.54	290.69	342.935	200.485	220	112.34	136.595	179.235	167.09	95.415	109.46	185.615	86.46	64.315	52.37	35.875	37.11	32.62	33.94	37.525	18.485	37.19	57.55	78.935	55.14
PDGFRA (platelet-derived growth factor receptor alpha) (PMID 23748534) (Most important)	80.905	85.36	95.58	72.9433	63.345	50.98	68.39	90.545	88.74	89.785	133.265	75.08	101.48	80.23	89.945	101.773	140.64	180.87	164.45	161.3	148.195	150.53	197.86	185.615	163.435	174.28	221.07	197.6	207.1	266.31	390.53	302.825	313.11	308.015	196.95	303.85	248.89	312.585	230.175	193.63	180.76	180.705
ADAMTSL2	128.81	140.5	129.175	54.5067	32.615	25.49	24.2133	31.235	28.59	26.345	42.555	36.755	33.5	29.26	28.335	55.5067	89.745	196.455	167.54	147.685	120.995	220	146.67	155.395	152.43	242.71	309.49	276.75	226.51	473.995	661.33	383.395	459.67	313.7	186.07	224.93	195.66	219.91	210.785	143.71	282.31	162.66
FGFR2	281.395	225.395	247.155	205.617	221.19	178.42	179.47	174.1	178.36	181.345	191.18	118.215	209.9	138.75	119.515	179.233	213.045	195.765	157.135	159.745	148.84	81.05	150.12	127.365	130.69	170.56	117.87	193.67	135.525	229.66	211.98	202.38	213.615	191.37	266.42	223.35	206.935	197.125	195.375	178.02	211.2	165.91
TCF12	263.83	195.845	247.845	215.297	220.875	203.91	205.173	247.06	223.95	241.745	272.14	163.895	232.18	204.35	172.92	173.46	280.465	201.34	226.27	216.78	171.35	196.84	227.52	168.63	190.845	213.375	171.585	183	183.46	196.315	127.235	146.385	159.195	139.785	151.03	149.16	145.9	133.12	166.805	129.33	133.235	141.7
HIF1alpha	270.105	267.5	255.01	238.007	210.22	261.26	246.91	272.47	265.69	267.41	263.615	217.24	205.37	221.91	149.7	197.713	244.97	211.59	199.25	238.855	168.87	208.42	157.25	164.98	206.74	166.325	174.555	180.75	235.74	186.805	168.88	170.55	163.67	137.31	198.76	176	164.76	187.76	170.93	166.775	186.39	179.96
integrin subunit alpha 8	186.66	119.575	172.09	104.887	92.105	146.56	108.853	115.755	127.32	120.79	85.53	109.995	207.535	124.12	114.13	121.287	183.59	189.39	148.11	148.89	129.195	127.37	167.59	198.505	218.92	226.435	168.72	326.14	271.64	322.48	329.07	278.295	360.105	229.355	341.94	317.26	273.395	254.71	354.87	267.815	282.21	227.245
ABCA3	188.355	276	269.31	242.383	186.505	114.7	129.88	120.595	238.33	230.3	170.19	81.835	143.945	230.2	149.615	185.087	217.175	154.385	229.155	117.865	123.08	150.53	139.165	165.015	209.585	222.625	168.72	288.53	164.13	212.705	161.515	285.68	305.5	225.5	338.32	241.5	244.985	190.05	271.15	281.34	233.18	273.46
E-Cadherin (CDH1)	346.77	287.135	372.71	185.223	221.145	165.68	214.94	152.695	272.18	258.715	147.17	120.755	205.255	141.68	143.35	241.763	267.995	273.33	200.525	166.64	171.35	173.69	188.51	165.26	240.23	181.815	169.06	268.33	142.73	241.71	313.42	188.79	196.575	162.915	255.55	247.02	228.24	174.145	227.655	179.595	191.61	206.6
POS_E	167.5	268	191.5	148.333	147.5	191	127.333	125.5	249	203	184.5	146	218	294	190	206.333	203.5	185.5	142	127	192.5	128	131	218.5	267	245.5	219	243	202.5	155.5	165	223.5	232.5	181.5	230	267	220	239	328	351	257.5	171
Aqp5(Aquaporin)	127.625	150.615	150.665	104.157	147.045	152.93	132.64	96.57	110.31	108.155	168.35	113.895	272.835	129	231.44	211.383	213.125	385.565	260.64	271.24	209.995	162.11	321.02	287.27	203.92	249.39	325.05	262.15	176.85	288.4	513.735	189.495	229.255	226.225	332.88	265.97	267.725	311.885	382.24	283.995	235.02	197.745
Chi3l3/Chi3l4	55.505	53.705	38.74	42.14	41.675	31.86	50.6533	39.415	11.22	9.515	21.38	18.435	17.24	29.02	33.54	28.0467	83.28	51.225	229.145	51.87	227.555	92.63	122.685	34.035	792.9	295.565	961.035	96.55	128.425	114.23	221.79	373.3	335.845	775	322	484.58	494.75	524.31	423.635	759.86	658.065	453.6
ALDH1A1 (PMID 11751205)	355.315	109.73	366.97	442.923	302.11	267.63	323.153	258.585	268.85	263.86	96.51	93.24	171.71	130.71	87.12	164.18	161.73	90.265	139.93	90.65	184.755	185.27	97.325	104.465	154.045	155.355	88.08	531.6	225.21	208.26	374.885	323.28	445.985	297.23	431.35	662.15	365.18	199.5	656.17	541.28	627.465	307.365
polr2a	471.345	375.075	472.375	421.003	375.725	286.75	329.637	338.97	284.98	294.91	300.37	326.05	272.325	254.34	223.145	213.543	266.875	230.16	235.15	229.195	215.205	370.53	183.835	219.095	230.94	249.82	168.375	240.26	278.68	259.365	226.165	296.37	290.025	282.48	236.82	233.61	259.545	224.24	213.41	236.15	229.27	249.045
rplp2	275.225	449.25	407.93	303.937	279.12	267.63	255.933	272.45	426.16	431.445	354.74	220.815	279.385	316.52	312.115	333.54	337.63	270.535	346.545	306.575	238.1	370.53	228.985	239.26	290.68	247.08	144.215	303.69	321.36	253.05	165.895	220.7	225.46	182.425	322	197.3	273.675	183.635	241.905	225.405	211.215	226.915
PDPn(Podoplanin)	194.22	156.275	270.62	207.847	184.415	152.93	171.4	202.32	187.12	193.425	267.35	182	207.415	188.99	150.94	168.553	252.225	223.7	245.655	190.085	181.765	185.27	266.53	216.64	329.41	303.52	338.465	409.22	341.415	466.41	565.185	284.17	405.955	368.695	543.72	400.92	402.885	384.725	542.185	351.045	357.935	243.66
Akt	244.74	219.92	349.655	199.173	252.105	203.91	277.28	291.94	399.33	381.655	332.965	271.345	460.155	301.16	285.81	395.32	440.51	489.755	363.95	302.435	220.54	335.79	407.77	324.55	342.56	349.89	262.535	354.77	250.13	284.005	181.605	218.27	188.945	175.29	239.24	228.08	229.12	193.45	245.8	181.83	171.755	176.72
Hist1h1b	121.15	430.42	63.18	114.42	142.425	210.28	291.827	693.755	508.06	539.12	999.9	727.715	609.72	583.78	811.985	616.847	595.755	515.905	590.385	608.475	288.71	289.48	139.54	173.81	251.875	270.465	94.155	181.88	223.14	80.145	62.855	68.66	35.03	49.19	27.19	46.56	59.825	29.69	55.905	62.595	82.625	53.165
LOX	843.51	904.75	814.985	617.13	401.895	477.92	458.03	367.14	349.52	364.225	270.67	203.83	273.51	194.59	229.765	216.207	237.095	227.735	268.835	370.325	261.12	243.16	255.57	227.845	274.11	313.45	213.63	322.22	408.3	337.66	436.28	230.635	282.195	297.035	250.72	265.97	246.305	198.805	212.96	136.22	157.25	131.91
P-63	640.915	480.095	611.19	701.933	559.46	548.01	534.073	676.81	480	473.985	479.715	440.05	329.475	431.13	323.065	333.593	399.765	282.36	390.275	406.345	252.67	393.69	200.695	240.92	343.655	331.39	199.875	321.09	399.765	317.465	257.39	283.82	356.79	289.46	419.27	295.96	318.28	242.07	314.9	310.78	346.455	319.48
Chi3l1	118.475	302.39	139.68	213.18	279.255	229.4	198.8	274.695	486.66	466.935	167.935	105.46	215.525	503.8	129.045	251.153	308.655	241.185	237.62	128.045	157.17	92.63	102.99	149.1	1167.95	225.755	253.285	387.89	226.375	450.595	175.97	483.935	732.81	389.205	1500.07	722.13	910.585	625.28	938.055	1363.38	858.63	970.63
Cdh11	435.13	213.04	434.24	511.633	499.26	414.19	402.07	775.89	641.52	632.295	862.105	665.075	477.375	769.11	618.495	594.88	739.2	448.935	606.79	727.045	392.92	544.22	272.43	346.135	437.26	365.005	246.25	264.96	457.175	254.955	240.285	262.72	293.355	208.18	276.09	209.93	196.39	191.685	211.685	213.37	195.835	161.97
ywhaz	330.695	422.785	439.9	426.787	422.385	407.82	396.33	416.875	517.71	516.715	512.94	381.185	418.5	422.11	390.675	434.403	531.95	578.39	465.63	348.785	356.1	428.43	409.99	418.665	519.015	434.305	377.98	482.76	503.815	520.09	381.98	458.485	488.14	384.125	490.56	429.33	386.43	372.615	500.27	405.12	444.095	515.425
Tnc	245.59	143.655	384.475	295.843	413.625	395.08	411.097	624.43	701.15	717.34	898.21	676.375	844.09	625.73	488.48	770.807	1070.3	1321.51	1098.69	947.48	697.25	544.22	622.26	547.255	820.3	609.435	334.235	265.52	370.64	176.12	115.835	74.245	63.84	55.235	90.02	64.72	48.1	49.24	53.65	44.515	77.125	65.8
NDST1	573.435	347.185	616.945	455.473	564.795	388.71	406	392.295	434.23	425.66	453.98	337.185	396.94	404.8	402.325	394.617	453.405	510.47	492.825	564.545	294.045	347.37	419.955	440.82	398.425	545.155	476.025	534.41	583.9	583.115	582.225	382.245	498.805	474.21	587.82	453.01	567.37	489.015	546.68	422.32	385.155	357.855
Vegf	235.89	165.455	338.35	250.233	287.005	159.31	153.24	175.675	420.37	381.125	421.985	207.57	261.525	353.59	236.12	463.927	592.505	445.755	742.845	381.86	376.265	486.32	436.575	375.96	449.43	589.725	477.87	645.55	339.415	528.24	476.535	601.9	756.49	617.845	920.1	726.08	788.55	721.965	750.51	827.37	900.88	688.08
FOXF1	288.685	151.345	215.74	224.913	349.78	248.52	321.247	320.82	334.97	316.335	645.565	348.045	854.545	406.02	458.47	517.453	740.49	899.985	844.745	499.41	328.775	393.69	615.975	406.39	575	469.195	630.41	570.89	387.19	769.99	934.635	576.765	676.665	485.495	798.67	530.35	660.795	586.31	650.435	465.775	703.105	648.975
Claudin5	474.26	384.22	459.78	334.47	706.44	516.15	451.98	549.93	500.17	521.45	821.36	460.965	1139.48	582.08	653.01	710.81	1141.2	1618.54	1114.13	634.15	462.275	706.32	1214.24	751.55	834.84	773.395	925.265	967.21	611.35	1430.82	1048.88	894.62	692.93	503.67	1083.82	819.21	709.23	640.54	959.19	602.25	681.66	643.88
Col1a1	465.95	458.5	629.665	576.237	733.265	936.72	875.383	1076.92	1555.57	1610.28	942.08	779.345	1573.5	702.54	814.185	941.02	1125.27	1068.64	1087.02	1341.89	1167.2	1030.54	801.89	969.285	891.655	1015.14	477.085	843.71	840.02	531.33	410.625	349.3	356.41	280.865	402.96	303.85	447.245	277.165	354.54	268.09	304.735	262.19
SFTP-D	1065.87	373.44	1479.38	1205.15	852.245	681.83	785.23	603.18	655.2	655.645	391.885	282.485	560.45	445.03	419.715	609.12	630.69	842.105	614.905	523.71	594.98	567.38	575.365	480.95	979.77	605.715	548.34	785.89	517.615	945.945	963.865	895.24	1003.74	891.515	1816.64	1234.33	1044.27	874.35	1183.09	1170.05	1240.6	1134.86
ppia	930.41	1100.38	1084.82	1197.76	1061.3	962.21	1083.23	1333.28	1151.86	1183.04	1240.67	988.045	1048.02	1062.96	888.42	955.097	1187.3	1068.03	996.595	932.455	774.675	856.85	761.8	706.995	912.745	696.535	532.845	657.9	940.395	778.26	639.71	719.08	775.61	603.42	809.54	730.02	774.085	611.055	788.135	786.915	959.385	906.71
INMT	561.875	259.75	654.74	226.787	63.14	19.12	29.2033	33.705	12.45	11.47	29.265	25.78	23.835	26.58	17.83	21.15	24.225	34.03	33.54	83.235	50.87	185.27	229.735	306.85	102.92	316.32	570.9	840.34	986.695	1229.38	1802.56	3099.04	3386.58	2785.38	2586.91	2650.98	2407.84	2865.61	2016.76	2687.39	2487.85	2459.22
VIM	789.465	777.54	923.835	797.82	766.605	356.84	532.587	695.95	1002.62	892.065	1331.58	753.09	924.145	1279.25	1311.67	1259.72	1123.68	1333.17	1435.66	1130.26	922.585	1053.7	1204.04	1039.15	1276.03	1330.15	613.285	1424.15	1107.95	766.11	792.005	1254.76	1238.93	883.76	1274.73	962.84	1043.97	744.91	979.9	1047.63	1232.66	1218.05
b2m	557.57	452.56	435.565	639.477	646.665	471.54	583.763	669.68	910.55	900.705	746.415	883.41	955.51	1276.57	1486.27	879.19	751.09	1053.06	837.885	697.245	812.525	845.27	709.855	863.26	1024.17	806.34	976.35	1190.62	955.52	1324.01	1522.09	1585.97	1814.72	1869.25	1295.87	1790.73	1674.92	1862.63	2098.12	2380.69	2498.07	2432.84
gapdh	1349.03	4692.86	1731.2	1359.76	1079.66	1178.86	1116.77	1214.13	1444.04	1430.89	1214.97	960.615	1165.55	1034.18	962.74	977.917	1324.54	1009.12	1206.57	1068.05	982.455	880.01	726.1	825.14	1165.16	752.63	727.71	1114.28	911.82	857.03	705.42	884.36	904.74	722.055	1191.36	882.34	877.125	771.585	1099.01	881.88	998	864.685
POS_D	1239	1705	1316.5	1143.67	1060.5	1246	905.333	884	1636	1373	1408	1210	1259	1839	1227.5	1372	1368	1395	1065	968.5	1137	870	841	1541	1775.5	1559	1357	1720	1385.5	1178	1215	1519.5	1483.5	1250	1510	1846	1570.5	1574.5	1940	2008	1554.5	1235.5
Eln	1407.18	1027.91	2227.05	992.61	808.41	917.6	860.613	735.44	1752.17	1600.36	1024.85	642.915	1800.17	1342.41	1016.13	2443.66	3099.02	3049.16	4632.6	3308.55	4224.69	4029.53	3563.53	3864.12	4969.6	6381.64	3714.61	6262.43	4849.61	3053.68	4604.39	1777.44	1587.97	1563.47	1509.74	1555.55	1361.49	1040.73	1484.67	693.035	548.815	457.245
AGER	1964.72	1673.32	3043.85	2358.21	2922.6	1994.51	1902.43	1679.41	2300.57	2278.03	2690.98	1921.71	2620.52	1846.21	1776.75	2307.35	2578.51	3988.72	3004.45	3826.15	2495.97	2211.61	3123.32	3007.47	3059.53	3091.28	3456.12	2920.15	3407.69	4971.43	4494.93	2816.49	3866.53	3955.88	3816.93	3879	3944.51	3828.16	4373.23	3433.3	3196.32	2926.82
POS_C	5691.5	7245.5	5644.5	4933	5259	6108	4416	4404	6335	5574.5	6392.5	5727.5	5611.5	7608	5559.5	6114.33	5713.5	6152	4261.5	4411	4902.5	4158	4340.5	6108	6876.5	6301	5403	6053	5900.5	5630.5	5804	6939.5	6136	6004.5	6340	8043	7275	7273	7479.5	8143	6210.5	4866
actb	9005.47	6466.26	10071.8	8706.48	11082.9	8946.6	10353.2	9873.84	9899.55	10350.8	10381.5	10128.5	18602	8457.08	10582.8	11803.7	11757.3	15752.4	13802.2	12469	11258.8	11498	14812.6	13263.7	11820.4	10564.2	11220.7	10451.2	10483.8	11456.9	13340.7	8766.17	8669.22	8540.49	9840.77	9837.58	9921.58	10438	10211.7	8374.61	9038.35	9187.61
SFTP-C	11842.7	9926.35	12911.1	14257.3	11658.1	8150.07	10429.9	11085.5	12050.2	11301.8	13569.5	8292.91	13929.8	13513.4	12416.3	14943.4	15462	17053.3	17174.1	12869.2	17476.5	17542.3	18579.2	15551.6	18172	14833.9	16902.5	17115	14345.6	22324.4	21853.1	21963.8	23954.1	18782.5	30392.9	23573.1	20628.6	20771.5	23465.4	23979.2	25406.7	24826.2
POS_B	19905	23611.5	19149.5	16415.7	17965.5	20365	14695.3	15075.5	21288	18855	21341.5	19305	20516	25241	20733	21653.7	19778.5	21826.5	14269.5	14997.5	18303	15105	14788.5	22921	22936.5	23727.5	20864	21698	20852	18719	20135.5	23165	19788.5	20495.5	20805	28088	25361	26386.5	25707.5	28193.5	21934	16195.5
POS_A	38031.5	63747	43413.5	38220	32159.5	44654	31819.3	27536.5	53181	44178.5	47746.5	35163	48645	74702	48155.5	51007	51394.5	46559.5	36344	32830.5	44380.5	32558	32086	59073	65953.5	59276	54288.5	63121	46377	36208	40351	53499	52550.5	41734.5	54587	71914	55990.5	60303	76915.5	80422.5	59752.5	41832.5

## Sheet: Sheet3
	P0.5	P1	P1.5	P2	P2.5	P3-a	P3	P3.5	P4-a	P4	P4.5	P5	P5.5	P6	P6.5	P7	P8	P8.5	P9	P9.5	P10	P10.5	P11	P11.5	P12	P12.5	P13	P13.5	P14	P15	P16	P17	P18	P19	P20	P21	P22	P23	P24	P25	P26	P27	P0.5	P1	P1.5	P2	P2.5	P3-a	P3
E2F8	5.055	4.34	1.8	2.45667	2.595	6.37	6.05	6.61	6.84	5.875	2.285	4.22	5.155	3.9	2.915	5.23	5.75	2.505	4.335	5	5.595	23.16	27.435	3.735	4.415	3.555	9.965	3.37	3.86	4.415	7.16	3.97	1.385	2.765	1.81	3.95	1.87	4.21	2.29	2.48	3.705	2.88	1	0.858556	0.356083	0.485987	0.513353	1.26014	1.19683
MMP7	7.595	14.76	4.12	4.52	2.28	6.37	9.55667	3.345	2.81	2.3	3.945	10	3.46	1.22	3.795	6.08667	10.34	3.275	2.565	6.895	5.595	11.58	13.41	2.185	2.86	5.87	6.76	3.37	2.75	6.94	7.16	4.88	1.725	2.765	3.62	2.37	3.715	5.6	1.875	3.095	1.905	3.82	1	1.94338	0.542462	0.595128	0.300197	0.83871	1.25828
MUC5Ac	3.8	9.135	7.47	12.0333	3.225	6.37	6.05	3.56	18.24	16.26	2.285	6.865	6.595	4.15	4.945	6.26333	4.79	5.815	3.745	8.1	5.595	23.16	16.86	3.46	3.3	9.34	8.365	4.49	8.83	3.79	7.16	6.535	2.025	6.55	7.25	7.1	3.715	3.845	2.55	2.12	3.04	3.21	1	2.40395	1.96579	3.16667	0.848684	1.67632	1.59211
KRT5	7.595	21.995	3.43	4.25333	4.165	6.37	6.05	4.1	5.61	4.48	3.945	6.865	3.785	1.46	4.945	6.08667	4.05	7.39	3.745	5	41.12	11.58	8.735	3.46	2.11	7.025	6.76	3.37	4.4	3.79	12.865	5.33	3.715	2.765	4.23	2.37	7.865	2.455	7.01	3.16	3.04	2.88	1	2.89598	0.451613	0.560018	0.548387	0.83871	0.796577
MCPt4	15.155	10.115	8.395	7.37667	3.535	12.74	12.1067	4.635	4.91	4.8	5.19	13.73	10.315	2.68	3.795	6.62667	6.46	6.665	7.285	5	11.32	11.58	8.735	3.735	1.795	14.305	6.76	1.12	5.51	5.05	10.01	6.73	1.645	8.225	2.42	3.95	4.645	7.73	1.55	1.23	2.475	2.205	1	0.667436	0.553943	0.486748	0.233256	0.840647	0.798856
ubc	11.36	8	5.845	5.71333	3.225	6.37	7.22	7.84	7.19	4.6	7.06	4.22	6.595	7.07	3.795	10.9567	4.42	4.97	4.335	5	8.46	11.58	8.735	6.005	5.3	4.715	8.365	3.93	4.4	10.1	11.47	11.61	4.72	6.405	8.46	7.1	5.52	14.355	7.39	8.95	6.665	7.485	1	0.704225	0.514525	0.502934	0.283891	0.560739	0.635563
NEG_B	10.5	7.5	4.5	4	8	4	4.66667	6	9	7	6	8.5	7	9	7.5	7.33333	11.5	9.5	3	5.5	5.5	5	4.5	10	6.5	7.5	7	7	7	4	9.5	10.5	9	11.5	6	16	8	7	9	13	9.5	11.5	1	0.714286	0.428571	0.380952	0.761905	0.380952	0.444444
KLra4	6.34	9.81	4.54	4.01333	6.215	25.49	12.4233	3.345	1.75	1.545	9.13	13.73	2.415	1.22	10.77	10.64	2.495	4.08	3.745	5	14.185	46.32	8.735	3.46	1.545	17.855	6.76	1.68	7.69	3.155	22.875	6.73	3.11	11.86	2.42	5.52	3.235	12.27	3.075	2.365	3.705	2.88	1	1.54732	0.716088	0.633018	0.980284	4.0205	1.95952
NEG_A	6	11.5	5.5	6.66667	6.5	11	8	8	9	7	9	6	5	9	7	11	7	8	7	6	6	5	6	7.5	12.5	7	9.5	10	7	11	6	8	9.5	10	8	12	8.5	7.5	13	10	12	6	1	1.91667	0.916667	1.11111	1.08333	1.83333	1.33333
SNAI1	5.055	10.42	2.66	3.08333	6.045	6.37	6.05	10.155	8.59	6.525	5.19	4.22	9.665	7.07	3.795	6.94333	9.645	6.7	5.515	5	8.46	11.58	16.86	6.28	17.3	12.975	11.91	28.63	4.4	11.365	14.32	17.085	4.8	5.605	13.9	15	9.245	3.845	14.995	9.275	3.805	3.785	1	2.06133	0.526212	0.609957	1.19585	1.26014	1.19683
AMACR	15.225	16.2	3.43	7.09333	2.91	25.49	20.2833	12.1	2.28	1.92	10.38	5.785	6.53	3.17	10.505	11.63	9.595	9.77	8.085	11.205	17.045	34.74	12.795	4.095	2.055	3.555	13.515	3.93	6.045	5.675	10.01	20.545	3.255	6.475	3.02	1.58	5.085	11.575	5.36	2.97	2.57	3.105	1	1.06404	0.225287	0.4659	0.191133	1.67422	1.33224
NEG_E	7	9	8	8.66667	9.5	11	5.66667	6	9	9.5	10.5	7.5	12.5	9	6	8	12.5	12	6	5	5	5	8.5	9	13	12	8	14	11	7.5	7	7.5	16	9	8	13	12	13	14	12.5	10	11.5	1	1.28571	1.14286	1.2381	1.35714	1.57143	0.809524
C/EBP	12.65	26.485	10.4	11.3967	12.175	6.37	6.05	6.965	11.05	11.105	8.095	10	5.155	10.97	10.24	6.98667	20.85	16.31	11.035	5	11.32	11.58	8.735	3.735	9.15	7.025	13.515	6.74	12.655	8.835	10.01	9.555	13.59	6.475	9.67	11.84	10.7	5.6	11.775	10.17	12.355	9.045	1	2.09368	0.822134	0.900922	0.962451	0.503557	0.478261
Ctnna2	18.95	18.335	5.92	13.95	13.45	12.74	9.34333	4.46	6.31	4.94	17.225	21.57	9.99	1.95	6.71	7.12	8.585	11.545	7.495	8.1	11.19	23.16	30.885	8.115	3.205	5.87	25.42	5.61	17.595	13.26	20.025	7.64	5.32	15.645	7.85	5.52	8.305	16.48	7.165	4.245	5.885	3.175	1	0.967546	0.312401	0.736148	0.709763	0.672296	0.493052
Kcnma1	19.055	4.49	9.615	9.00667	7.3	6.37	8.38667	18.375	17.89	16.31	19.095	16.375	30.76	11.7	6.71	12.7133	21.515	13.16	12.625	14.305	5.595	34.74	20.92	2.185	4.63	7.025	31.84	3.37	11.55	6.31	18.63	6.885	3.715	4.585	2.42	3.95	22.205	7.73	3.75	4.965	1.62	2.32	1	0.235634	0.504592	0.472667	0.383102	0.334295	0.440129
ALDH1A2	25.26	27.855	29.89	14.7233	24.83	6.37	8.38667	8.76	17.01	16.65	15.98	16.27	11.105	7.07	11.65	11.99	17.74	8.235	4.925	11.205	25.63	23.16	13.41	2.185	8.86	4.715	8.365	5.05	7.72	6.315	12.865	14.22	9.095	2.765	9.67	5.52	6.525	9.77	2.55	8.665	4.47	2.845	1	1.10273	1.18329	0.582871	0.982977	0.252177	0.332014
NEG_F	13	14	10.5	12.3333	9	8	9	11.5	15	11.5	11	19	16	11	9	13.6667	10.5	13.5	7	11.5	7.5	10	7	14	13	14.5	16.5	11	11.5	12	12	15.5	11	15	14	18	18.5	19	11.5	13	14.5	11	1	1.07692	0.807692	0.948718	0.692308	0.615385	0.692308
FOXD1	11.395	12.405	4.98	13.76	6.44	19.12	18.5833	16.38	3.86	3.155	21.375	21.675	6.595	3.9	3.795	18.1267	13.985	5.735	16.58	21.885	11.32	34.74	18.085	7.835	3.965	5.95	11.57	9.54	15.44	8.835	24.4	8.845	6.825	12.805	9.06	4.74	8.345	19.305	8.215	6.42	4.575	7.555	1	1.08864	0.437034	1.20755	0.56516	1.67793	1.63083
MMP-3	22.785	37.87	11.415	10.47	9.44	12.74	10.9367	15.305	5.79	4.79	10.17	5.785	4.505	2.68	4.945	14.61	12.41	14.05	2.565	8.1	17.045	23.16	21.535	4.73	6.57	8.18	18.67	14.6	12.12	9.465	38.725	11.11	10.035	9.315	9.06	10.26	7.405	12.555	18.635	10.065	15.125	11.225	1	1.66206	0.500987	0.459513	0.414308	0.55914	0.479994
PTGS2	31.635	8.76	19.935	9.75333	11.545	31.86	15.7167	16.94	8.24	9.14	3.53	17.835	7.575	4.39	5.56	18.5267	13.195	11.51	4.545	9.995	13.79	34.74	20.92	6.28	10.06	8.35	14.78	11.79	7.72	22.08	10.01	9.75	14.875	16.59	29	22.89	11.135	22.085	14.81	12.315	29.57	24.775	1	0.276908	0.630156	0.308308	0.364944	1.00711	0.496813
Nol3	8.82	37.715	4.81	10.4167	3.535	25.49	24.2133	3.92	4.91	4.24	9.755	8.92	12.405	4.15	9.62	25.9267	5.6	13.32	12.035	21.2	5.595	23.16	12.795	22.505	6.55	15.46	11.91	7.3	7.18	15.785	10.01	14.475	8.515	18.34	9.67	15	10.18	12.595	16.05	12	14.275	10.865	1	4.27608	0.545351	1.18103	0.400794	2.89002	2.74528
Thy1	8.85	47.99	12.525	9.72667	7.07	19.12	14.2333	10.155	13.5	16.125	6.435	5.785	13.775	8.05	9.975	8.97	6.685	8.28	10.445	6.895	5.595	34.74	17.47	14.115	9.45	16.53	14.78	14.03	19.24	18.935	12.865	18.445	13.11	9.245	12.08	18.15	26.005	9.77	17.06	16.595	22.045	21.24	1	5.4226	1.41525	1.09906	0.79887	2.16045	1.60829
HPGDS	29.06	22.605	11.185	28.1433	24.37	31.86	25.1667	13.02	10.87	11.685	16.605	15.3	10.385	7.8	14.035	19.79	12.41	11.545	6.315	17.575	13.925	57.9	17.47	11.57	5.82	5.87	16.72	7.3	8.8	9.47	18.63	16.48	9.895	5.605	8.46	11.05	7.44	16.11	7.165	6.96	5.325	7.36	1	0.777873	0.384893	0.968456	0.83861	1.09635	0.866024
Acta2	15.155	44.03	13.215	19.88	18.93	25.49	22.62	26.73	12.63	10.78	23.865	14.7	27.295	14.14	10.855	24.4367	14.41	17.28	15.785	20.68	14.05	34.74	12.795	15.95	10.695	5.87	28.63	6.17	9.935	10.095	24.335	9.75	5.66	12.15	12.08	3.95	7.875	5.97	5.135	5.4	6.08	5.68	1	2.90531	0.871989	1.31178	1.24909	1.68195	1.49258
kcne1L	22.75	42.05	8.75	20.5867	9.035	38.23	28.46	13.535	6.66	6.9	18.885	15.785	16.515	7.8	15.71	24.3033	18.895	22.485	14.985	8.79	27.715	46.32	26.21	9.385	6.21	11.735	26.69	5.05	22.535	10.73	27.185	11.005	4.7	10.99	11.48	3.16	11.545	24.535	8.14	4.18	9.61	7.78	1	1.84835	0.384615	0.904908	0.397143	1.68044	1.25099
ITGax (CD11c)	16.41	10.27	5.06	9.91667	8.095	25.49	17.0967	16.225	8.77	7.845	10.17	6.865	8.945	9.02	11.65	15.4667	12.14	14.98	14.015	31.195	30.19	23.16	22.145	11.65	15.41	11.735	45.355	16.84	17.65	13.255	41.575	16.785	16.04	14.845	10.27	20.52	22.7	22.7	16.42	23.645	23	16.42	1	0.625838	0.308349	0.604306	0.493297	1.55332	1.04184
Wif1	8.85	18.335	9.005	11.8233	14.14	25.49	19.1167	21.065	18.24	18.16	29.475	12.055	13.45	15.36	20.48	31.42	25.14	32.06	32.535	22.575	19.905	69.47	33.715	24.415	19.84	18.84	16.385	15.72	18.165	18.925	24.4	13.12	7.57	9.245	3.62	11.05	6.96	5.97	8.215	4.495	6.175	4.72	1	2.07175	1.01751	1.33597	1.59774	2.88023	2.16008
Sox9	27.805	28.685	24.365	21.3167	13.83	44.61	29.4167	20.325	15.08	14.795	19.095	20.485	19.005	10	15.18	15.8267	21.66	10.9	14.185	18.785	33.565	46.32	17.47	11.295	10.885	12.975	11.57	8.98	11.04	4.415	60.275	9.6	8.59	19.14	9.67	3.95	18.085	11.575	6.6	4.605	7.71	2.325	1	1.03165	0.876281	0.766649	0.497393	1.60439	1.05796
RAGE	37.875	38.58	36.12	32.4633	23.975	44.61	41.95	19.43	20.52	20.415	22.83	14.215	33.105	8.29	16.33	22.9933	22.965	19.905	12.21	18.095	19.39	46.32	8.735	7.2	7.31	7.025	23.48	6.17	24.805	16.395	27.185	13.01	7.01	13.83	12.69	9.47	11.135	6.99	10.05	10.08	11.975	6.615	1	1.01861	0.953663	0.857118	0.633003	1.17782	1.10759
ITgam (CD11b)	26.58	19.25	15.36	20.41	14.14	6.37	21.7667	22.275	16.84	16.79	10.175	30.595	23.51	25.36	18.095	25.88	11.495	15.665	18.35	20.68	30.965	57.9	34.945	13.76	14.405	16.53	19.93	7.3	26.99	11.36	24.265	14.43	17.005	25.1	20.54	18.94	12.905	26.585	22.01	22.345	19.02	36.655	1	0.724229	0.577878	0.767871	0.531979	0.239654	0.818911
MGAT4A	34.11	38.8	19.48	28.1833	16.105	19.12	23.2567	18.175	10	10.58	16.605	31.675	12.805	13.41	17.21	27.4567	10.88	16.55	9.855	20.68	27.845	81.05	16.86	10.66	10.02	21.155	9.965	11.23	25.345	13.25	21.415	20.305	14.855	36.02	21.14	15.78	28.755	25.235	18.935	11.45	19.195	10.14	1	1.1375	0.571094	0.826248	0.472149	0.560539	0.681814
F13A1	51.88	47.835	28.44	45.0033	34.35	70.09	48.1067	14.295	18.06	18.96	20.135	30.975	15.145	9.27	13.15	27.1833	17.39	12.395	8.465	20.68	19.65	46.32	16.86	10.66	14.37	7.11	16.72	15.72	11.58	15.155	22.875	19.095	10.295	22.925	19.33	15	24.49	23.76	20.66	16.89	11.985	35.04	1	0.922032	0.548188	0.867451	0.662105	1.351	0.927268
ERB	17.695	44.885	12.97	24.45	17.215	70.09	35.15	17.995	9.29	7.325	25.32	11.565	22	10	13.415	34.72	20.255	14.855	9.855	9.995	33.825	23.16	16.86	6.64	11.77	19.915	41.805	11.79	12.095	21.455	54.505	35.58	22.325	20.085	20.54	18.15	25.55	33.945	16.575	17.515	20.835	19.205	1	2.53659	0.732975	1.38175	0.972874	3.96101	1.98644
NME7	25.325	28.925	37.865	42.0067	28.22	31.86	37.7	20.73	32.44	32.845	28.025	29.405	18.355	19.02	18.625	19.7067	32.095	25.395	21.47	54.46	25.37	46.32	8.735	17.295	22.435	20.085	8.365	19.09	24.235	15.765	25.725	22.67	21.3	15.79	19.94	16.57	20.32	12.885	17.17	19.33	22.065	19.95	1	1.14215	1.49516	1.6587	1.11431	1.25805	1.48865
Claudin 1	48.01	43.835	49.34	42.44	24.43	44.61	39.5067	23.53	18.41	18.245	18.68	23.73	21.025	15.12	10.855	30.6133	21.705	10.82	21.125	12.58	27.975	57.9	17.47	20.755	18.255	29.505	29.895	27.51	41.835	21.45	12.865	24.38	22.865	25.975	25.37	18.15	25.465	19.63	19.8	17.205	22.725	17.95	1	0.913039	1.0277	0.883983	0.508852	0.929181	0.822884
RARA RARBRARG Retinoic acid receptors alpha beta gamma	6.31	24.365	29.86	11.1567	16.65	19.12	11.47	19.83	29.64	29.55	24.91	10	28.015	23.17	16.945	27.8167	31.925	29.23	25.22	13.785	33.565	11.58	17.47	19.13	48.59	23.465	40.78	43.79	16.545	36.6	44.36	18.61	25.395	14.845	46.52	36.3	36.96	18.485	53.84	33.595	24.64	31.575	1	3.86133	4.73217	1.76809	2.63867	3.03011	1.81775
Serpina3	34.11	39.19	22.52	14.9767	12.655	31.86	20.39	19.785	12.45	13.7	22.21	27.84	22.725	11.95	13.77	32.0567	12.58	27.375	17.93	29.985	38.905	69.47	34.33	32.61	13.375	22.31	46.275	26.94	23.13	29.025	55.83	41.86	24.575	31.65	25.98	39.46	23.145	32.1	24.145	25.01	18.83	19.6	1	1.14893	0.660217	0.43907	0.371006	0.934037	0.597772
ABCG2	25.225	42.295	36.99	37.9633	21.895	19.12	18.16	35.02	47	46.26	30.51	23.135	18.68	52.43	12.005	18.5333	34.32	28.38	23.655	21.885	19.515	34.74	16.86	17.655	46.835	17.515	17.985	26.38	22.055	27.75	42.9	23.44	37.22	13.97	44.71	35.51	34.69	18.855	39.37	33.9	34.34	33.075	1	1.67671	1.4664	1.50499	0.867988	0.757978	0.719921
PCYOX1	40.45	27.635	33.4	21.8967	33.24	57.35	39.5067	38.005	29.81	31.865	29.685	38.92	19.4	26.82	28.95	26.9233	26.2	35.165	35.87	41.355	14.05	34.74	24.98	36.145	24.395	32.715	26.69	21.89	43.565	19.57	45.815	24.935	26.48	27.725	21.75	39.46	31.875	23.11	22.16	28.405	33.77	23.285	1	0.683189	0.825711	0.541327	0.821755	1.4178	0.976679
MUC5Ab	27.805	39.36	13.06	51.1967	9.44	286.75	247.327	10.155	214.48	203.31	16.815	4.22	23.835	4.15	6.71	11.4533	11.52	14.13	6.315	8.79	22.51	23.16	8.735	2.82	5.28	4.715	9.965	17.96	2.75	9.475	15.78	9.145	5.36	10.19	15.1	5.52	10.16	8.055	5.585	7.9	5.425	6.335	1	1.41557	0.4697	1.84128	0.339507	10.3129	8.89504
EPHA7	30.41	60.705	35.715	32.4133	37.005	38.23	36.2133	37.465	37.88	38.915	42.345	32.05	27.765	31.7	38.485	43.4233	50.325	28.02	32.33	46.875	33.955	34.74	42.455	20.955	22.32	21.155	35.39	20.21	33.035	33.45	34.345	28.345	25.795	37.04	21.75	22.89	24.085	42.74	20.36	21.97	23.01	18.52	1	1.99622	1.17445	1.06588	1.21687	1.25715	1.19084
LRAT	27.87	21.605	11.915	13.4933	8.41	19.12	10.3	33.995	5.96	5.435	22	15.3	15.22	6.1	12.005	19.4267	9.99	14.935	7.285	23.095	27.975	92.63	25.595	18.495	9.81	9.34	21.535	11.79	22.535	28.4	64.45	35.38	22.265	49.775	29.6	41.04	31.95	235.57	62.915	87.67	40.715	30.54	1	0.775206	0.427521	0.484153	0.301758	0.686042	0.369573
IGF1	26.58	34.48	25.15	44.6567	34.75	25.49	23.3667	56.135	41.91	39.365	38.405	23.62	40.17	48.28	53.4	56.63	37.055	37.91	42.185	49.455	67.78	104.21	26.21	22.865	41.935	41.24	29.55	20.21	26.45	19.56	47.275	25.98	12.33	14.845	17.52	9.47	18.54	17.835	15.595	12.305	15.98	11.055	1	1.29722	0.9462	1.68009	1.30737	0.958992	0.879107
GUCY1A2 sGC(soluble guanylate cyclase) (PMID 23934926)	31.535	52.965	27.735	29.2233	21.75	12.74	8.17333	25.185	23.68	22.885	31.135	23.62	41.725	38.77	18.975	47.0733	26.79	41.58	42.39	27.405	27.715	104.21	32.11	38.61	45.86	43.55	31.5	48.84	51.23	55.525	54.37	49.16	41.295	27.725	45.31	26.83	36.62	38.44	42.405	32.685	31.09	28.42	1	1.67956	0.879499	0.926695	0.68971	0.403996	0.259183
Shisa3	25.225	58.33	22.815	37.19	32.555	31.86	45.24	56.42	49.98	51.325	72.04	63.13	68.05	41.94	36.805	85.1267	60.045	36.575	35.695	31.36	33.44	127.37	36.17	25.49	20.815	39.095	19.93	11.79	32.47	25.24	17.175	19.7	16.22	23.285	12.69	12.63	15.805	27.32	13.01	14.475	15.225	14.34	1	2.31239	0.90446	1.47433	1.29058	1.26303	1.79346
PRIM2	53.17	34.195	35.715	41.46	25.545	89.21	71.0433	53.33	41.56	42.76	38.19	48.54	34.87	35.85	40.865	40.4933	43.57	30.605	32.92	50.665	30.835	34.74	37.78	35.99	30.05	22.23	49.825	23.02	35.845	25.24	37.265	24.285	20.635	36.09	26.58	33.94	27.33	18.855	32.77	26.3	31.66	25.66	1	0.643126	0.671713	0.779763	0.48044	1.67783	1.33615
TTF-1	27.735	68.92	36.375	46.8033	33.465	25.49	26.1267	29.44	41.39	41.895	28.64	37.46	19.4	32.68	19.86	39.6767	38.905	33.59	39.44	38.255	33.7	34.74	48.355	38.815	36.23	39.825	53.375	33.12	42.97	41.025	31.495	52.22	47.035	45.265	49.54	33.94	42.155	37.465	46.87	33.205	35.66	28.82	1	2.48495	1.31152	1.68752	1.2066	0.919055	0.942011
EPHA3	75.715	98.985	93.645	92.21	91.565	76.47	61.49	92.925	47.18	50.59	35.5	56.86	47.205	37.55	45.545	42.61	42.705	19.095	33.715	14.305	11.19	81.05	12.795	19.48	19.785	22.395	45.355	20.77	23.13	17.68	28.575	29.3	18.07	20.3	19.94	13.42	18.55	18.855	12.635	18.96	20.66	13.525	1	1.30734	1.23681	1.21786	1.20934	1.00997	0.812124
THTPA	51.74	47.19	52.88	38.25	58.61	44.61	43.12	59.405	48.05	44.22	57.08	37.35	48.72	41.21	28.685	54.5133	45.96	44.125	38.85	31.36	55.95	46.32	16.86	42.91	40.085	52.885	41.805	43.22	43.54	46.06	32.955	56.79	30.33	44.32	33.83	37.88	41.205	39.875	34.23	35.265	29.945	27.1	1	0.91206	1.02203	0.739273	1.13278	0.862196	0.833398
tbp	41.775	37.21	30.36	35.1733	24.83	57.35	52.8867	36.93	26.13	25.115	39.44	42.16	17.96	42.92	37.07	46.1733	35.895	34.72	38.055	40.15	53.085	34.74	78.625	52.93	26.265	50.66	56.92	32.56	56.22	47.96	68.625	46.99	48.32	51.885	35.64	48.14	45.835	52.845	36.78	43.38	52.84	41.49	1	0.890724	0.72675	0.841971	0.594375	1.37283	1.26599
hprt	45.54	51.595	39.52	33.2167	26.31	31.86	32.9233	36.41	36.65	34.505	66.215	28.915	51.135	34.38	55.255	51.1767	38.61	61.245	45.545	68.765	59.07	81.05	58.085	49.905	35.985	43.295	57.265	44.91	47.34	41.025	47.275	49.405	24.21	36.09	33.83	37.09	35.65	59.175	31.835	33	31.935	29.685	1	1.13296	0.867809	0.729395	0.577734	0.699605	0.722954
Claudin 3	87.14	66.78	85.525	60.0867	57.22	57.35	56.0733	39.26	53.66	50.82	35.08	36.27	50.69	32.43	50.755	52.7533	38.165	55.47	57.37	34.465	27.715	46.32	59.31	30.7	31.25	53.14	25.085	57.26	48.505	42.28	38.59	42.425	39.665	39.07	73.7	38.67	35.145	39.915	36.405	38.73	41.64	34.755	1	0.766353	0.981467	0.689542	0.656644	0.658136	0.643486
P4HA3	36.685	15.76	28.39	27.1233	31.585	19.12	35.0467	48.915	42.79	45.945	68.085	52.54	88.49	41.21	40.605	79.3667	96.16	122.85	82.175	95.48	98.235	115.79	110.12	54.36	82.86	87.185	47.875	41.54	44.105	22.71	15.715	18.19	8.875	19.21	10.27	12.63	1.855	12.595	10.8	7.39	9.795	6.775	1	0.429603	0.773886	0.739358	0.860979	0.521194	0.955341
Dnmt3a	70.735	44.24	66.625	41.4867	52.315	76.47	45.0333	49.61	45.77	48.55	48.16	35.785	56.755	43.89	44.665	57.93	46.28	54.74	73.57	38.775	67.395	69.47	61.155	64.735	47.005	62.56	56.24	57.82	47.37	64.375	68.76	58.055	40.795	33.4	44.1	37.09	34.28	32.23	38.09	26.085	22.345	21.85	1	0.625433	0.941896	0.586508	0.739591	1.08108	0.636649
ABCD1	51.74	34.785	119.645	42.27	38.17	50.98	52.3533	32.67	49.46	49.945	48.99	32.05	52.365	34.14	41.13	60.1033	44.26	63.305	43.15	46.355	58.94	69.47	42.455	53.645	36.98	55.365	43.41	49.96	57.305	39.765	78.635	68.15	45.79	48.17	50.75	46.56	43.055	49.285	48.93	49.42	35.655	48.49	1	0.672304	2.31243	0.816969	0.737727	0.985311	1.01185
CD68	35.335	35.33	45.125	81.1767	51.375	114.7	77.1	45.37	58.93	57.585	40.06	36.375	41.47	51.45	46.955	39.4067	41.645	34.115	35.9	37.045	36.43	46.32	30.27	31.135	66.16	41.24	47.3	34.8	64.48	47.98	51.52	45.595	48.24	61.2	54.98	71.03	55.645	74.76	70.56	101.665	84.58	78.095	1	0.999858	1.27706	2.29734	1.45394	3.24607	2.18197
CTPS2	92.295	43.02	54.7	57.5567	38.17	108.33	70.5167	56.04	47.35	47.22	48.16	69.405	49.765	35.6	33.275	57.31	49.86	53.975	42.945	58.25	58.42	34.74	51.805	52.53	43.745	57.68	51.085	37.05	66.075	56.15	91.7	60.56	43.46	55.74	51.35	52.88	56.065	63.925	52.155	44.905	42.13	43.465	1	0.466114	0.592665	0.623616	0.413565	1.17374	0.764036
EGFR (Epidermal growth factor receptor) (PMID 22916088 22245996)	167.23	64.51	88.75	99.2233	123.655	76.47	98.5533	120.025	54.89	54.67	129.765	97.03	59.825	37.8	42.895	56.9933	63.745	116.08	48.67	61.35	56.075	46.32	57.705	46.325	89.08	64.615	46.275	55.57	96.79	130.15	93.025	42.67	62.415	32.24	60.41	48.93	131.53	46.83	51.44	45.985	131.055	165.91	1	0.385756	0.530706	0.593335	0.739431	0.457274	0.589328
Robo1	74.525	66.39	65.44	55.5867	48.295	95.58	62.7633	78.265	72.78	72.32	109.385	102.535	63.145	71.45	59.58	69.8867	95.47	63.825	80.615	85.13	67.655	46.32	38.39	47.595	52.45	49.165	58.185	54.45	69.445	38.505	38.59	46.385	42.2	24.23	38.66	26.83	24.94	25.52	24.26	24.045	35.005	24.66	1	0.890842	0.878095	0.745879	0.648038	1.28252	0.842178
hmbs	74.525	61.525	69.025	73.7633	69.87	57.35	55.2233	67.29	63.66	66.645	75.35	65.19	56.685	73.16	59.58	52.71	73.145	54.58	61.47	70.66	55.95	81.05	44.295	44.895	55.295	54.13	46.275	42.66	84.21	50.49	70.15	60.66	35.835	49.775	50.14	38.67	40.35	36.4	42.405	39.595	34.42	48.75	1	0.825562	0.926199	0.98978	0.937538	0.76954	0.741004
PHGDH	61.85	354.6	75.695	76.3167	36.63	63.72	50.6567	58.955	56.12	47.81	41.515	52.65	46.3	40.24	30.275	45.2267	58.69	30.28	37.605	47.045	30.835	46.32	51.805	47.085	39.24	31.65	44.67	45.47	34.71	28.4	51.52	57.15	33.585	28.525	50.75	26.04	39.765	47.975	44.39	32.315	39.78	33.975	1	5.73323	1.22385	1.2339	0.592239	1.03023	0.819025
Claudin 7	49.2	56.275	59.645	54.25	44.215	70.09	64.5633	44.28	56.82	54.63	52.515	42.54	96.785	37.07	36.545	68.4867	62.12	100.53	80.475	45.665	85.875	104.21	55.25	62.87	50.325	63.8	48.22	67.92	45.725	48.6	77.31	57.995	34.93	34.415	53.77	44.99	37.985	60.855	62.69	37.43	44.805	32.915	1	1.1438	1.2123	1.10264	0.898679	1.42459	1.31226
GUSB	79.545	46.53	63.265	75.13	90.995	63.72	52.1433	85.325	68.75	67.74	57.7	64.215	51.925	56.82	45.9	58.48	52.305	53.615	58.965	79.965	64.405	34.74	78.625	55.91	60.25	63.72	73.64	59.5	72.685	57.415	28.645	58.86	50.67	64.035	51.96	48.14	44.945	47.85	43.905	50.43	48.67	60.015	1	0.584952	0.795336	0.944497	1.14394	0.801056	0.65552
Lrp2	27.805	35.005	28.17	42.5133	41.31	70.09	55.1167	30.675	40.51	38.775	18.27	30.485	38.405	33.9	34.16	49.6867	55.04	45.66	41.625	24.99	52.83	11.58	63.985	47.84	58.155	48.26	61.05	49.4	35.225	61.855	91.565	85.69	78.955	78.735	146.2	78.92	107.36	129.4	119.98	113.26	105.91	105.285	1	1.25895	1.01313	1.52898	1.4857	2.52077	1.98226
pgk1	53.135	68.37	60.05	51.8333	46.58	76.47	77.5267	42.325	59.8	59.69	54.39	55.89	78.69	57.55	74.055	72.01	75.17	56.6	55.78	62.56	63.89	104.21	48.355	69.035	61.425	78.92	79.375	61.75	45.24	49.835	67.3	42.47	39.85	37.11	59.81	47.35	58.785	55.375	49.645	44.285	45.375	42.15	1	1.28672	1.13014	0.975503	0.876635	1.43916	1.45905
NFATC3	97.21	85.91	73.675	74.39	84.41	70.09	73.91	75.355	50.86	54.665	88.01	57.73	55.965	68.52	57.55	45.8567	71.49	32.3	68.61	73.24	47.365	57.9	24.98	54.79	63.5	57.765	55.66	54.45	74.93	65.02	67.235	54.195	61.33	54.865	64.04	80.5	64.29	57.295	58.53	60.025	58.37	49.705	1	0.883757	0.757895	0.76525	0.868326	0.721016	0.760313
Src	50.39	55.355	67.225	31.8567	42.11	63.72	56.4967	32.2	69.27	63.87	42.14	40.97	52.505	57.31	43.87	82.0233	70.14	77.555	64.63	72.555	53.86	115.79	25.595	76.825	78.66	81.065	41.46	88.13	60.625	68.8	104.43	77.205	71.91	58.72	87	73.4	67.105	62.615	79.34	52.865	53.345	41.055	1	1.09853	1.33409	0.632202	0.835682	1.26454	1.12119
FSP1 (S100a4)	54.285	91.085	50.75	56.15	37.09	50.98	54.16	48.555	51.74	51.535	51.06	33.73	68.44	67.3	36.455	55.5067	54.005	46.345	51.235	37.565	72.86	81.05	75.18	56.03	96.3	50.32	74.91	56.14	54.575	59.95	83.015	74.845	72.35	71.885	79.75	81.29	65.25	64.62	95.57	109.455	60.405	142.575	1	1.6779	0.934881	1.03436	0.683246	0.939118	0.997697
Epcam	98.635	107.2	103.63	87.9233	70.76	82.84	79.7567	89.745	76.81	76.01	70.99	61.35	61.45	54.62	43.87	57.3967	77.955	48.93	63.27	64.62	61.28	104.21	58.085	55.83	57.02	63.55	69.415	73.54	42.97	69.42	64.315	46.35	55.19	51.01	77.93	59.19	51.4	48.59	67.34	58.925	67.305	49.41	1	1.08684	1.05064	0.891401	0.717392	0.839864	0.808604
ipo8	55.575	73.21	78.72	68.3067	58.785	70.09	65.7333	53.6	72.78	79.015	88.22	69.295	71.435	59.74	42.72	68.1733	80.25	65.97	73.745	59.97	58.81	92.63	66.44	56.19	59.315	70.74	49.825	64.56	77.65	62.46	58.615	83.03	66.35	88.85	73.1	51.3	60.2	65.025	57.93	61.915	62.35	66.705	1	1.31732	1.41646	1.22909	1.05776	1.26118	1.18279
FGF18	53.17	49.155	51.55	41.0867	52	38.23	42.16	71.77	71.9	75.005	88.645	62.055	57.8	79.01	63.64	90.63	123.2	144.535	141.67	108.91	66.62	196.84	97.705	93.885	123.135	95.45	81.905	55.57	87.53	58.69	41.505	43.52	21.8	27.865	35.04	16.57	31.08	25.15	30.56	25.995	16.75	16.335	1	0.924487	0.969532	0.772742	0.977995	0.719014	0.792928
POS_F	56.5	88	65	61.6667	58.5	73	48	43.5	76	71.5	70.5	70.5	66.5	91	68.5	67	63.5	77.5	53.5	49	59	54	52	67.5	94	78	66.5	88	69	51	60	73.5	67.5	71.5	79	96	90.5	86	106.5	97	76	66	1	1.55752	1.15044	1.09145	1.0354	1.29204	0.849558
NME3	53.065	90.93	59.645	49.8033	41.54	101.96	75.6167	35.715	66.12	67.09	56.665	48.43	72.485	43.65	44.31	80.84	81.83	81.31	79.64	64.455	84.175	81.05	110.12	67.76	73.05	88.51	90.95	92.06	81	72.57	81.485	75.5	72.455	74.95	83.97	68.66	80.115	60.16	77.16	69.58	60.405	60.275	1	1.71356	1.124	0.938535	0.782814	1.92142	1.42498
N-Cadherin(CDH2)	60.625	69.785	72.815	61.83	56.48	44.61	72.96	94.585	124.34	124.32	88.01	93.025	131.005	87.79	80.585	110.787	135.535	112.765	124.565	83.235	84.695	196.84	87.36	88.47	107.065	59.91	65.285	78.03	94.74	80.165	87.325	40.685	64.58	64.76	54.37	53.67	42.66	46.215	38.015	36.445	41.065	45.3	1	1.15109	1.20107	1.01988	0.931629	0.735835	1.20346
LFNG (Lunatic Fringe) (PMID 19897741)	68.225	84.955	68.63	61.79	71.835	50.98	67.1167	56.845	89.62	81.185	102.325	71.355	84.63	89.01	69.2	113.487	102.63	104.08	88.04	63.415	56.335	46.32	70.505	57.895	72.035	96.515	60.71	106.66	104.05	105.39	108.875	128.07	90.035	100.925	189.09	107.33	143.96	82.205	139.625	113.42	89.575	95.365	1	1.24522	1.00594	0.90568	1.05291	0.747233	0.983755
KRT18	234.16	184.37	184.345	131.14	108.59	152.93	151.753	75.69	81.9	76.99	71.405	57.835	86.795	53.89	58.435	92.4367	85.995	88.45	71.59	85.3	59.195	57.9	87.36	73.05	52.035	72.15	36.31	71.29	62.325	61.2	103.105	62.22	56.73	77.715	100.89	81.29	106.115	84.74	76.935	77.025	73.77	55.67	1	0.787368	0.787261	0.560044	0.463743	0.6531	0.648075
TBX4	59.405	57.425	65.86	32.95	39.97	19.12	53.0967	56.485	77.69	73.435	122.05	62.54	109.77	83.15	106.535	119.52	100.34	133.715	115.275	111.495	95.5	127.37	112.34	119.05	110.595	167.43	124.39	127.43	105.24	70.055	85.865	96.705	67.87	70.435	80.95	82.08	61.5	83.965	83.72	58.03	49.285	44.58	1	0.966669	1.10866	0.554667	0.672839	0.321858	0.893808
GATA-6	139.055	102.93	140.475	127.35	123.92	70.09	99.08	89.38	111.71	118.565	117.065	96.265	96.18	92.91	103.89	85.4433	99.045	82.24	98.965	81.51	50.225	162.11	52.415	75.11	83.205	70.315	67.81	115.64	103.08	81.43	94.485	91.435	70.445	79.895	106.33	87.6	84.72	80.45	84.51	80.54	57.055	63.005	1	0.740211	1.01021	0.915825	0.891158	0.504045	0.712524
tfrc	88.295	49.82	77.845	118.967	70.5	95.58	87.6133	106.03	98.91	101.115	89.46	59.51	69.745	96.08	82.88	84.0933	107.285	78.315	100.97	112.015	105.91	34.74	57.705	75.625	126.275	78.83	65.52	101.6	87.505	112.345	88.715	124.4	118.1	86.23	127.47	111.28	107.36	97.375	114.245	119.75	108.725	89.525	1	0.564245	0.881647	1.34738	0.79846	1.08251	0.99228
BCL2A1	102.265	135.615	114.34	180.803	128.825	89.21	133.387	105.695	80.32	84.345	72.865	48.22	60.15	99.74	64.17	75.84	99.64	58.055	68.995	75.305	73.12	57.9	73.335	62.985	104.785	59.74	80.645	59.5	98.575	87.105	120.21	101.885	86.34	106.89	112.37	104.18	107.23	145.845	101.27	166.545	147.885	119.775	1	1.32611	1.11808	1.76799	1.25972	0.872341	1.30432
Igfbp3	237.795	236.97	233.38	78.05	73.525	101.96	92.0767	60.48	56.82	60.1	27.815	41.57	64.655	17.31	15.535	30.6633	44.9	49.54	48.525	26.365	56.075	81.05	82.685	66.285	41.94	71.165	99.99	135.29	67.21	159.04	216.155	81.385	117.88	126.175	183.05	164.95	153.835	168.01	150.425	100.83	90.79	124.72	1	0.996531	0.981434	0.328224	0.309195	0.428773	0.38721
GFPT1	126.34	99.635	121.825	98.4967	116.8	127.44	112.993	90.545	129.43	137.13	85.935	65.89	109.84	82.42	51.195	94.64	154.87	147.325	118.46	127.695	133.76	81.05	78.625	105.735	133.685	106.84	115.69	108.9	77.65	102.875	138.775	77.215	76.685	75.385	109.95	97.07	104.125	79.34	97.185	79.625	75.7	83.04	1	0.788626	0.964263	0.779616	0.924489	1.00871	0.894359
FOXF2	29.025	53.12	40.085	42.8633	43.62	76.47	55.33	59.245	90.67	82.155	109.4	77.35	140.74	97.05	69.025	120.027	181.6	153.495	188.395	120.8	83.925	196.84	180.39	143.945	193.74	172.305	129.545	210.51	88.155	72.565	103.035	101.94	66.99	60.035	85.18	96.28	70.305	52.105	101.495	72.655	40.79	58.37	1	1.83015	1.38105	1.47677	1.50284	2.63463	1.90629
CD38	51.845	82.275	71.235	53.9167	41.31	31.86	38.5467	49.315	67.17	66.5	59.155	44.105	64.655	62.67	47.31	62.99	101.32	119.99	119.32	54.625	86.655	138.95	90.195	87.4	103.525	128.76	127.94	131.36	109.07	178.595	207.6	178.19	136.91	143.64	123.24	202.83	113.79	173.245	170.185	135.145	122.05	93.555	1	1.58694	1.374	1.03996	0.796798	0.614524	0.743498
SMAD3	155.295	117.23	141.54	105.743	125.01	114.7	97.0633	114.43	126.27	125.62	135.96	92.055	138.715	97.79	91.09	109.263	146.17	191.45	113.57	148.205	110.45	92.63	132.645	134.915	124.165	106.025	137.565	111.15	100.245	95.31	100.05	104.69	79.655	86.085	96.06	82.08	95.335	77.665	90.36	74.58	67.885	59.095	1	0.754886	0.911427	0.680919	0.804984	0.738594	0.625025
PRDX3	161.87	134.57	167.795	173.893	133.61	172.05	158.767	142.265	102.77	111.86	112.92	126.27	94.3	107.54	76.175	87.74	119.965	90.95	114.955	118.22	103.825	127.37	64.6	108.16	96.5	118.915	95.18	73.54	149.315	93.41	110.265	87.21	92.005	106.455	102.7	104.18	121.105	101.305	114.615	96.6	112.03	89.385	1	0.831346	1.0366	1.07428	0.825415	1.06289	0.980828
PRSS35	37.875	67.245	42.245	82.6	105.48	82.84	95.05	204.89	210.1	200.9	277.125	214.38	253.535	272.14	252.27	274.18	290.235	243.525	329.46	211.62	173.825	115.79	136.33	139.57	178.005	122.215	87.5	39.29	101.865	29.65	44.425	26.325	10.155	27.58	14.5	11.05	11.555	16.48	11.55	9.03	11.52	11.925	1	1.77545	1.11538	2.18086	2.78495	2.18719	2.50957
TST	287.975	217.85	273.85	291.537	239.835	146.56	152.287	171.42	151.52	161.565	110.84	112.645	156.28	93.88	53.49	126.877	150.455	124.225	114.155	94.775	117.615	185.27	100.16	100.88	102.125	97.675	80.98	140.9	131.125	115.51	102.97	90.635	106.54	94.67	147.41	133.38	124.025	88.05	109.255	131.695	108.375	91.16	1	0.756489	0.950951	1.01237	0.832833	0.508933	0.528819
EXT1	131.29	106.915	132.475	112.893	153.29	127.44	136.673	219.325	145.39	156.155	178.93	156.27	192.965	181.67	146.88	195.867	181.89	124.105	175.94	193.19	109.03	150.53	126.98	155.16	153.72	155.695	115.11	111.71	152.155	112.96	113.115	101.095	98.67	93.43	103.91	82.87	106.01	72.02	104.795	84.11	87.59	86.62	1	0.814342	1.00903	0.859878	1.16757	0.970676	1.041
PDGFRb	54.32	53.985	53.63	49.8267	66.735	89.21	79.22	51.31	68.57	74.675	111.255	76.755	179.26	75.59	82	161.74	111.535	178.935	211.385	122.695	172.92	208.42	278.71	228.41	148.515	236.67	211.205	209.38	109.61	169.78	241.88	174.595	108.805	117.435	103.91	150.74	121.49	145.595	109.63	101.81	77.995	74.345	1	0.993833	0.987297	0.91728	1.22855	1.6423	1.45839
ATP1B1	264.41	328.235	381.29	168.573	154.695	159.31	119.903	89.625	109.43	112.735	78.045	78.215	88.375	100.96	76.525	101.68	125.69	90.27	111.735	66.35	67.655	162.11	83.915	70.105	93.98	83.375	75.145	136.41	82.03	133.775	153.03	156.645	238.61	181.77	264.61	146.79	226.17	134.145	205.46	187.24	270.36	192.085	1	1.24139	1.44204	0.637545	0.585057	0.602511	0.453475
DLK1	905.59	1699.07	903.04	171.983	102.86	197.54	179.367	165.165	256.22	271.045	146.74	144.97	337.605	62.91	65.23	57.08	65.645	39.965	19.495	40.84	19.775	11.58	22.145	15.95	7.56	11.905	21.875	7.3	11.58	13.255	21.415	11.31	7.845	17.465	6.04	8.68	13.475	15.415	7.8	4.72	11.32	4.515	1	1.8762	0.997184	0.189913	0.113583	0.218134	0.198066
TGFB1	144.005	82.81	174.465	142.353	144.365	159.31	149.423	154.945	140.3	144.91	145.51	138.105	226.86	141.68	140.17	155.887	153.715	199.435	171.495	153.72	171.09	150.53	147.9	187.81	192.04	195.61	134.595	217.24	184.025	236.065	246.125	190.715	169.995	179.73	187.28	212.3	199.705	133.775	226.98	160.425	156.47	179	1	0.575049	1.21152	0.98853	1.0025	1.10628	1.03763
Hist1h2ab	55.71	224.28	26.445	80.4333	72.755	127.44	198.693	457.6	339	338.545	549.695	456.92	169.915	442.11	418.13	356.783	272.99	141.54	290.69	342.935	200.485	220	112.34	136.595	179.235	167.09	95.415	109.46	185.615	86.46	64.315	52.37	35.875	37.11	32.62	33.94	37.525	18.485	37.19	57.55	78.935	55.14	1	4.02585	0.47469	1.44379	1.30596	2.28756	3.56656
PDGFRA (platelet-derived growth factor receptor alpha) (PMID 23748534) (Most important)	80.905	85.36	95.58	72.9433	63.345	50.98	68.39	90.545	88.74	89.785	133.265	75.08	101.48	80.23	89.945	101.773	140.64	180.87	164.45	161.3	148.195	150.53	197.86	185.615	163.435	174.28	221.07	197.6	207.1	266.31	390.53	302.825	313.11	308.015	196.95	303.85	248.89	312.585	230.175	193.63	180.76	180.705	1	1.05506	1.18139	0.901592	0.782955	0.630122	0.845312
ADAMTSL2	128.81	140.5	129.175	54.5067	32.615	25.49	24.2133	31.235	28.59	26.345	42.555	36.755	33.5	29.26	28.335	55.5067	89.745	196.455	167.54	147.685	120.995	220	146.67	155.395	152.43	242.71	309.49	276.75	226.51	473.995	661.33	383.395	459.67	313.7	186.07	224.93	195.66	219.91	210.785	143.71	282.31	162.66	1	1.09075	1.00283	0.423156	0.253202	0.197888	0.187977
FGFR2	281.395	225.395	247.155	205.617	221.19	178.42	179.47	174.1	178.36	181.345	191.18	118.215	209.9	138.75	119.515	179.233	213.045	195.765	157.135	159.745	148.84	81.05	150.12	127.365	130.69	170.56	117.87	193.67	135.525	229.66	211.98	202.38	213.615	191.37	266.42	223.35	206.935	197.125	195.375	178.02	211.2	165.91	1	0.800991	0.878321	0.730705	0.786048	0.634055	0.637787
TCF12	263.83	195.845	247.845	215.297	220.875	203.91	205.173	247.06	223.95	241.745	272.14	163.895	232.18	204.35	172.92	173.46	280.465	201.34	226.27	216.78	171.35	196.84	227.52	168.63	190.845	213.375	171.585	183	183.46	196.315	127.235	146.385	159.195	139.785	151.03	149.16	145.9	133.12	166.805	129.33	133.235	141.7	1	0.742315	0.939412	0.816043	0.837187	0.772884	0.777672
HIF1alpha	270.105	267.5	255.01	238.007	210.22	261.26	246.91	272.47	265.69	267.41	263.615	217.24	205.37	221.91	149.7	197.713	244.97	211.59	199.25	238.855	168.87	208.42	157.25	164.98	206.74	166.325	174.555	180.75	235.74	186.805	168.88	170.55	163.67	137.31	198.76	176	164.76	187.76	170.93	166.775	186.39	179.96	1	0.990356	0.944114	0.881163	0.77829	0.967253	0.914126
integrin subunit alpha 8	186.66	119.575	172.09	104.887	92.105	146.56	108.853	115.755	127.32	120.79	85.53	109.995	207.535	124.12	114.13	121.287	183.59	189.39	148.11	148.89	129.195	127.37	167.59	198.505	218.92	226.435	168.72	326.14	271.64	322.48	329.07	278.295	360.105	229.355	341.94	317.26	273.395	254.71	354.87	267.815	282.21	227.245	1	0.640603	0.921944	0.561913	0.493437	0.785171	0.583164
ABCA3	188.355	276	269.31	242.383	186.505	114.7	129.88	120.595	238.33	230.3	170.19	81.835	143.945	230.2	149.615	185.087	217.175	154.385	229.155	117.865	123.08	150.53	139.165	165.015	209.585	222.625	168.72	288.53	164.13	212.705	161.515	285.68	305.5	225.5	338.32	241.5	244.985	190.05	271.15	281.34	233.18	273.46	1	1.46532	1.4298	1.28684	0.990178	0.608956	0.689549
E-Cadherin (CDH1)	346.77	287.135	372.71	185.223	221.145	165.68	214.94	152.695	272.18	258.715	147.17	120.755	205.255	141.68	143.35	241.763	267.995	273.33	200.525	166.64	171.35	173.69	188.51	165.26	240.23	181.815	169.06	268.33	142.73	241.71	313.42	188.79	196.575	162.915	255.55	247.02	228.24	174.145	227.655	179.595	191.61	206.6	1	0.828027	1.0748	0.534139	0.637728	0.477781	0.619834
POS_E	167.5	268	191.5	148.333	147.5	191	127.333	125.5	249	203	184.5	146	218	294	190	206.333	203.5	185.5	142	127	192.5	128	131	218.5	267	245.5	219	243	202.5	155.5	165	223.5	232.5	181.5	230	267	220	239	328	351	257.5	171	1	1.6	1.14328	0.885572	0.880597	1.1403	0.760199
Aqp5(Aquaporin)	127.625	150.615	150.665	104.157	147.045	152.93	132.64	96.57	110.31	108.155	168.35	113.895	272.835	129	231.44	211.383	213.125	385.565	260.64	271.24	209.995	162.11	321.02	287.27	203.92	249.39	325.05	262.15	176.85	288.4	513.735	189.495	229.255	226.225	332.88	265.97	267.725	311.885	382.24	283.995	235.02	197.745	1	1.18014	1.18053	0.816115	1.15216	1.19828	1.03929
Chi3l3/Chi3l4	55.505	53.705	38.74	42.14	41.675	31.86	50.6533	39.415	11.22	9.515	21.38	18.435	17.24	29.02	33.54	28.0467	83.28	51.225	229.145	51.87	227.555	92.63	122.685	34.035	792.9	295.565	961.035	96.55	128.425	114.23	221.79	373.3	335.845	775	322	484.58	494.75	524.31	423.635	759.86	658.065	453.6	1	0.96757	0.697955	0.759211	0.750833	0.574002	0.91259
ALDH1A1 (PMID 11751205)	355.315	109.73	366.97	442.923	302.11	267.63	323.153	258.585	268.85	263.86	96.51	93.24	171.71	130.71	87.12	164.18	161.73	90.265	139.93	90.65	184.755	185.27	97.325	104.465	154.045	155.355	88.08	531.6	225.21	208.26	374.885	323.28	445.985	297.23	431.35	662.15	365.18	199.5	656.17	541.28	627.465	307.365	1	0.308825	1.0328	1.24657	0.85026	0.753219	0.909484
polr2a	471.345	375.075	472.375	421.003	375.725	286.75	329.637	338.97	284.98	294.91	300.37	326.05	272.325	254.34	223.145	213.543	266.875	230.16	235.15	229.195	215.205	370.53	183.835	219.095	230.94	249.82	168.375	240.26	278.68	259.365	226.165	296.37	290.025	282.48	236.82	233.61	259.545	224.24	213.41	236.15	229.27	249.045	1	0.795755	1.00219	0.893196	0.797134	0.608365	0.699353
rplp2	275.225	449.25	407.93	303.937	279.12	267.63	255.933	272.45	426.16	431.445	354.74	220.815	279.385	316.52	312.115	333.54	337.63	270.535	346.545	306.575	238.1	370.53	228.985	239.26	290.68	247.08	144.215	303.69	321.36	253.05	165.895	220.7	225.46	182.425	322	197.3	273.675	183.635	241.905	225.405	211.215	226.915	1	1.6323	1.48217	1.10432	1.01415	0.972404	0.929906
PDPn(Podoplanin)	194.22	156.275	270.62	207.847	184.415	152.93	171.4	202.32	187.12	193.425	267.35	182	207.415	188.99	150.94	168.553	252.225	223.7	245.655	190.085	181.765	185.27	266.53	216.64	329.41	303.52	338.465	409.22	341.415	466.41	565.185	284.17	405.955	368.695	543.72	400.92	402.885	384.725	542.185	351.045	357.935	243.66	1	0.804629	1.39337	1.07016	0.949516	0.787406	0.882504
Akt	244.74	219.92	349.655	199.173	252.105	203.91	277.28	291.94	399.33	381.655	332.965	271.345	460.155	301.16	285.81	395.32	440.51	489.755	363.95	302.435	220.54	335.79	407.77	324.55	342.56	349.89	262.535	354.77	250.13	284.005	181.605	218.27	188.945	175.29	239.24	228.08	229.12	193.45	245.8	181.83	171.755	176.72	1	0.898586	1.42868	0.813816	1.03009	0.83317	1.13296
Hist1h1b	121.15	430.42	63.18	114.42	142.425	210.28	291.827	693.755	508.06	539.12	999.9	727.715	609.72	583.78	811.985	616.847	595.755	515.905	590.385	608.475	288.71	289.48	139.54	173.81	251.875	270.465	94.155	181.88	223.14	80.145	62.855	68.66	35.03	49.19	27.19	46.56	59.825	29.69	55.905	62.595	82.625	53.165	1	3.55279	0.521502	0.944449	1.17561	1.7357	2.4088
LOX	843.51	904.75	814.985	617.13	401.895	477.92	458.03	367.14	349.52	364.225	270.67	203.83	273.51	194.59	229.765	216.207	237.095	227.735	268.835	370.325	261.12	243.16	255.57	227.845	274.11	313.45	213.63	322.22	408.3	337.66	436.28	230.635	282.195	297.035	250.72	265.97	246.305	198.805	212.96	136.22	157.25	131.91	1	1.0726	0.966183	0.731621	0.476456	0.566585	0.543005
P-63	640.915	480.095	611.19	701.933	559.46	548.01	534.073	676.81	480	473.985	479.715	440.05	329.475	431.13	323.065	333.593	399.765	282.36	390.275	406.345	252.67	393.69	200.695	240.92	343.655	331.39	199.875	321.09	399.765	317.465	257.39	283.82	356.79	289.46	419.27	295.96	318.28	242.07	314.9	310.78	346.455	319.48	1	0.749077	0.953621	1.09521	0.872908	0.855043	0.833298
Chi3l1	118.475	302.39	139.68	213.18	279.255	229.4	198.8	274.695	486.66	466.935	167.935	105.46	215.525	503.8	129.045	251.153	308.655	241.185	237.62	128.045	157.17	92.63	102.99	149.1	1167.95	225.755	253.285	387.89	226.375	450.595	175.97	483.935	732.81	389.205	1500.07	722.13	910.585	625.28	938.055	1363.38	858.63	970.63	1	2.55235	1.17898	1.79937	2.35708	1.93627	1.67799
Cdh11	435.13	213.04	434.24	511.633	499.26	414.19	402.07	775.89	641.52	632.295	862.105	665.075	477.375	769.11	618.495	594.88	739.2	448.935	606.79	727.045	392.92	544.22	272.43	346.135	437.26	365.005	246.25	264.96	457.175	254.955	240.285	262.72	293.355	208.18	276.09	209.93	196.39	191.685	211.685	213.37	195.835	161.97	1	0.489601	0.997955	1.17582	1.14738	0.951876	0.924023
ywhaz	330.695	422.785	439.9	426.787	422.385	407.82	396.33	416.875	517.71	516.715	512.94	381.185	418.5	422.11	390.675	434.403	531.95	578.39	465.63	348.785	356.1	428.43	409.99	418.665	519.015	434.305	377.98	482.76	503.815	520.09	381.98	458.485	488.14	384.125	490.56	429.33	386.43	372.615	500.27	405.12	444.095	515.425	1	1.27847	1.33023	1.29057	1.27726	1.23322	1.19848
Tnc	245.59	143.655	384.475	295.843	413.625	395.08	411.097	624.43	701.15	717.34	898.21	676.375	844.09	625.73	488.48	770.807	1070.3	1321.51	1098.69	947.48	697.25	544.22	622.26	547.255	820.3	609.435	334.235	265.52	370.64	176.12	115.835	74.245	63.84	55.235	90.02	64.72	48.1	49.24	53.65	44.515	77.125	65.8	1	0.584938	1.56552	1.20462	1.68421	1.6087	1.67391
NDST1	573.435	347.185	616.945	455.473	564.795	388.71	406	392.295	434.23	425.66	453.98	337.185	396.94	404.8	402.325	394.617	453.405	510.47	492.825	564.545	294.045	347.37	419.955	440.82	398.425	545.155	476.025	534.41	583.9	583.115	582.225	382.245	498.805	474.21	587.82	453.01	567.37	489.015	546.68	422.32	385.155	357.855	1	0.605448	1.07588	0.794289	0.984933	0.677862	0.708014
Vegf	235.89	165.455	338.35	250.233	287.005	159.31	153.24	175.675	420.37	381.125	421.985	207.57	261.525	353.59	236.12	463.927	592.505	445.755	742.845	381.86	376.265	486.32	436.575	375.96	449.43	589.725	477.87	645.55	339.415	528.24	476.535	601.9	756.49	617.845	920.1	726.08	788.55	721.965	750.51	827.37	900.88	688.08	1	0.701407	1.43435	1.06081	1.21669	0.675357	0.649625
FOXF1	288.685	151.345	215.74	224.913	349.78	248.52	321.247	320.82	334.97	316.335	645.565	348.045	854.545	406.02	458.47	517.453	740.49	899.985	844.745	499.41	328.775	393.69	615.975	406.39	575	469.195	630.41	570.89	387.19	769.99	934.635	576.765	676.665	485.495	798.67	530.35	660.795	586.31	650.435	465.775	703.105	648.975	1	0.524257	0.74732	0.779096	1.21163	0.860869	1.11279
Claudin5	474.26	384.22	459.78	334.47	706.44	516.15	451.98	549.93	500.17	521.45	821.36	460.965	1139.48	582.08	653.01	710.81	1141.2	1618.54	1114.13	634.15	462.275	706.32	1214.24	751.55	834.84	773.395	925.265	967.21	611.35	1430.82	1048.88	894.62	692.93	503.67	1083.82	819.21	709.23	640.54	959.19	602.25	681.66	643.88	1	0.810146	0.969468	0.705246	1.48956	1.08833	0.953022
Col1a1	465.95	458.5	629.665	576.237	733.265	936.72	875.383	1076.92	1555.57	1610.28	942.08	779.345	1573.5	702.54	814.185	941.02	1125.27	1068.64	1087.02	1341.89	1167.2	1030.54	801.89	969.285	891.655	1015.14	477.085	843.71	840.02	531.33	410.625	349.3	356.41	280.865	402.96	303.85	447.245	277.165	354.54	268.09	304.735	262.19	1	0.984011	1.35136	1.23669	1.5737	2.01034	1.87871
SFTP-D	1065.87	373.44	1479.38	1205.15	852.245	681.83	785.23	603.18	655.2	655.645	391.885	282.485	560.45	445.03	419.715	609.12	630.69	842.105	614.905	523.71	594.98	567.38	575.365	480.95	979.77	605.715	548.34	785.89	517.615	945.945	963.865	895.24	1003.74	891.515	1816.64	1234.33	1044.27	874.35	1183.09	1170.05	1240.6	1134.86	1	0.350362	1.38796	1.13067	0.799577	0.639693	0.736703
ppia	930.41	1100.38	1084.82	1197.76	1061.3	962.21	1083.23	1333.28	1151.86	1183.04	1240.67	988.045	1048.02	1062.96	888.42	955.097	1187.3	1068.03	996.595	932.455	774.675	856.85	761.8	706.995	912.745	696.535	532.845	657.9	940.395	778.26	639.71	719.08	775.61	603.42	809.54	730.02	774.085	611.055	788.135	786.915	959.385	906.71	1	1.18268	1.16595	1.28735	1.14068	1.03418	1.16425
INMT	561.875	259.75	654.74	226.787	63.14	19.12	29.2033	33.705	12.45	11.47	29.265	25.78	23.835	26.58	17.83	21.15	24.225	34.03	33.54	83.235	50.87	185.27	229.735	306.85	102.92	316.32	570.9	840.34	986.695	1229.38	1802.56	3099.04	3386.58	2785.38	2586.91	2650.98	2407.84	2865.61	2016.76	2687.39	2487.85	2459.22	1	0.462291	1.16528	0.403625	0.112374	0.0340289	0.0519748
VIM	789.465	777.54	923.835	797.82	766.605	356.84	532.587	695.95	1002.62	892.065	1331.58	753.09	924.145	1279.25	1311.67	1259.72	1123.68	1333.17	1435.66	1130.26	922.585	1053.7	1204.04	1039.15	1276.03	1330.15	613.285	1424.15	1107.95	766.11	792.005	1254.76	1238.93	883.76	1274.73	962.84	1043.97	744.91	979.9	1047.63	1232.66	1218.05	1	0.984895	1.1702	1.01058	0.971044	0.452002	0.674617
b2m	557.57	452.56	435.565	639.477	646.665	471.54	583.763	669.68	910.55	900.705	746.415	883.41	955.51	1276.57	1486.27	879.19	751.09	1053.06	837.885	697.245	812.525	845.27	709.855	863.26	1024.17	806.34	976.35	1190.62	955.52	1324.01	1522.09	1585.97	1814.72	1869.25	1295.87	1790.73	1674.92	1862.63	2098.12	2380.69	2498.07	2432.84	1	0.811665	0.781184	1.1469	1.15979	0.845705	1.04698
gapdh	1349.03	4692.86	1731.2	1359.76	1079.66	1178.86	1116.77	1214.13	1444.04	1430.89	1214.97	960.615	1165.55	1034.18	962.74	977.917	1324.54	1009.12	1206.57	1068.05	982.455	880.01	726.1	825.14	1165.16	752.63	727.71	1114.28	911.82	857.03	705.42	884.36	904.74	722.055	1191.36	882.34	877.125	771.585	1099.01	881.88	998	864.685	1	3.47869	1.2833	1.00795	0.800327	0.873858	0.827832
POS_D	1239	1705	1316.5	1143.67	1060.5	1246	905.333	884	1636	1373	1408	1210	1259	1839	1227.5	1372	1368	1395	1065	968.5	1137	870	841	1541	1775.5	1559	1357	1720	1385.5	1178	1215	1519.5	1483.5	1250	1510	1846	1570.5	1574.5	1940	2008	1554.5	1235.5	1	1.37611	1.06255	0.923056	0.855932	1.00565	0.730697
Eln	1407.18	1027.91	2227.05	992.61	808.41	917.6	860.613	735.44	1752.17	1600.36	1024.85	642.915	1800.17	1342.41	1016.13	2443.66	3099.02	3049.16	4632.6	3308.55	4224.69	4029.53	3563.53	3864.12	4969.6	6381.64	3714.61	6262.43	4849.61	3053.68	4604.39	1777.44	1587.97	1563.47	1509.74	1555.55	1361.49	1040.73	1484.67	693.035	548.815	457.245	1	0.730476	1.58263	0.705387	0.574487	0.652082	0.611585
AGER	1964.72	1673.32	3043.85	2358.21	2922.6	1994.51	1902.43	1679.41	2300.57	2278.03	2690.98	1921.71	2620.52	1846.21	1776.75	2307.35	2578.51	3988.72	3004.45	3826.15	2495.97	2211.61	3123.32	3007.47	3059.53	3091.28	3456.12	2920.15	3407.69	4971.43	4494.93	2816.49	3866.53	3955.88	3816.93	3879	3944.51	3828.16	4373.23	3433.3	3196.32	2926.82	1	0.851683	1.54926	1.20028	1.48754	1.01517	0.9683
POS_C	5691.5	7245.5	5644.5	4933	5259	6108	4416	4404	6335	5574.5	6392.5	5727.5	5611.5	7608	5559.5	6114.33	5713.5	6152	4261.5	4411	4902.5	4158	4340.5	6108	6876.5	6301	5403	6053	5900.5	5630.5	5804	6939.5	6136	6004.5	6340	8043	7275	7273	7479.5	8143	6210.5	4866	1	1.27304	0.991742	0.866731	0.924009	1.07318	0.775894
actb	9005.47	6466.26	10071.8	8706.48	11082.9	8946.6	10353.2	9873.84	9899.55	10350.8	10381.5	10128.5	18602	8457.08	10582.8	11803.7	11757.3	15752.4	13802.2	12469	11258.8	11498	14812.6	13263.7	11820.4	10564.2	11220.7	10451.2	10483.8	11456.9	13340.7	8766.17	8669.22	8540.49	9840.77	9837.58	9921.58	10438	10211.7	8374.61	9038.35	9187.61	1	0.718037	1.1184	0.966799	1.23068	0.993463	1.14965
SFTP-C	11842.7	9926.35	12911.1	14257.3	11658.1	8150.07	10429.9	11085.5	12050.2	11301.8	13569.5	8292.91	13929.8	13513.4	12416.3	14943.4	15462	17053.3	17174.1	12869.2	17476.5	17542.3	18579.2	15551.6	18172	14833.9	16902.5	17115	14345.6	22324.4	21853.1	21963.8	23954.1	18782.5	30392.9	23573.1	20628.6	20771.5	23465.4	23979.2	25406.7	24826.2	1	0.838187	1.09022	1.2039	0.984417	0.688196	0.88071
[truncated: 77 more columns]

## Sheet: Sheet1
	P0.5	P1	P1.5	P2	P2.5	P3-a	P3	P3.5	P4-a	P4	P4.5	P5	P5.5	P6	P6.5	P7	P8	P8.5	P9	P9.5	P10	P10.5	P11	P11.5	P12	P12.5	P13	P13.5	P14	P15	P16	P17	P18	P19	P20	P21	P22	P23	P24	P25	P26	P27	P0.5	P1	P1.5	P2	P2.5	P3-a	P3
E2F8	5.055	4.34	1.8	2.45667	2.595	6.37	6.05	6.61	6.84	5.875	2.285	4.22	5.155	3.9	2.915	5.23	5.75	2.505	4.335	5	5.595	23.16	27.435	3.735	4.415	3.555	9.965	3.37	3.86	4.415	7.16	3.97	1.385	2.765	1.81	3.95	1.87	4.21	2.29	2.48	3.705	2.88	1	0.858556	0.356083	0.485987	0.513353	1.26014	1.19683
MMP7	7.595	14.76	4.12	4.52	2.28	6.37	9.55667	3.345	2.81	2.3	3.945	10	3.46	1.22	3.795	6.08667	10.34	3.275	2.565	6.895	5.595	11.58	13.41	2.185	2.86	5.87	6.76	3.37	2.75	6.94	7.16	4.88	1.725	2.765	3.62	2.37	3.715	5.6	1.875	3.095	1.905	3.82	1	1.94338	0.542462	0.595128	0.300197	0.83871	1.25828
MUC5Ac	3.8	9.135	7.47	12.0333	3.225	6.37	6.05	3.56	18.24	16.26	2.285	6.865	6.595	4.15	4.945	6.26333	4.79	5.815	3.745	8.1	5.595	23.16	16.86	3.46	3.3	9.34	8.365	4.49	8.83	3.79	7.16	6.535	2.025	6.55	7.25	7.1	3.715	3.845	2.55	2.12	3.04	3.21	1	2.40395	1.96579	3.16667	0.848684	1.67632	1.59211
KRT5	7.595	21.995	3.43	4.25333	4.165	6.37	6.05	4.1	5.61	4.48	3.945	6.865	3.785	1.46	4.945	6.08667	4.05	7.39	3.745	5	41.12	11.58	8.735	3.46	2.11	7.025	6.76	3.37	4.4	3.79	12.865	5.33	3.715	2.765	4.23	2.37	7.865	2.455	7.01	3.16	3.04	2.88	1	2.89598	0.451613	0.560018	0.548387	0.83871	0.796577
MCPt4	15.155	10.115	8.395	7.37667	3.535	12.74	12.1067	4.635	4.91	4.8	5.19	13.73	10.315	2.68	3.795	6.62667	6.46	6.665	7.285	5	11.32	11.58	8.735	3.735	1.795	14.305	6.76	1.12	5.51	5.05	10.01	6.73	1.645	8.225	2.42	3.95	4.645	7.73	1.55	1.23	2.475	2.205	1	0.667436	0.553943	0.486748	0.233256	0.840647	0.798856
ubc	11.36	8	5.845	5.71333	3.225	6.37	7.22	7.84	7.19	4.6	7.06	4.22	6.595	7.07	3.795	10.9567	4.42	4.97	4.335	5	8.46	11.58	8.735	6.005	5.3	4.715	8.365	3.93	4.4	10.1	11.47	11.61	4.72	6.405	8.46	7.1	5.52	14.355	7.39	8.95	6.665	7.485	1	0.704225	0.514525	0.502934	0.283891	0.560739	0.635563
NEG_B	10.5	7.5	4.5	4	8	4	4.66667	6	9	7	6	8.5	7	9	7.5	7.33333	11.5	9.5	3	5.5	5.5	5	4.5	10	6.5	7.5	7	7	7	4	9.5	10.5	9	11.5	6	16	8	7	9	13	9.5	11.5	1	0.714286	0.428571	0.380952	0.761905	0.380952	0.444444
KLra4	6.34	9.81	4.54	4.01333	6.215	25.49	12.4233	3.345	1.75	1.545	9.13	13.73	2.415	1.22	10.77	10.64	2.495	4.08	3.745	5	14.185	46.32	8.735	3.46	1.545	17.855	6.76	1.68	7.69	3.155	22.875	6.73	3.11	11.86	2.42	5.52	3.235	12.27	3.075	2.365	3.705	2.88	1	1.54732	0.716088	0.633018	0.980284	4.0205	1.95952
NEG_A	6	11.5	5.5	6.66667	6.5	11	8	8	9	7	9	6	5	9	7	11	7	8	7	6	6	5	6	7.5	12.5	7	9.5	10	7	11	6	8	9.5	10	8	12	8.5	7.5	13	10	12	6	1	1.91667	0.916667	1.11111	1.08333	1.83333	1.33333
SNAI1	5.055	10.42	2.66	3.08333	6.045	6.37	6.05	10.155	8.59	6.525	5.19	4.22	9.665	7.07	3.795	6.94333	9.645	6.7	5.515	5	8.46	11.58	16.86	6.28	17.3	12.975	11.91	28.63	4.4	11.365	14.32	17.085	4.8	5.605	13.9	15	9.245	3.845	14.995	9.275	3.805	3.785	1	2.06133	0.526212	0.609957	1.19585	1.26014	1.19683
AMACR	15.225	16.2	3.43	7.09333	2.91	25.49	20.2833	12.1	2.28	1.92	10.38	5.785	6.53	3.17	10.505	11.63	9.595	9.77	8.085	11.205	17.045	34.74	12.795	4.095	2.055	3.555	13.515	3.93	6.045	5.675	10.01	20.545	3.255	6.475	3.02	1.58	5.085	11.575	5.36	2.97	2.57	3.105	1	1.06404	0.225287	0.4659	0.191133	1.67422	1.33224
NEG_E	7	9	8	8.66667	9.5	11	5.66667	6	9	9.5	10.5	7.5	12.5	9	6	8	12.5	12	6	5	5	5	8.5	9	13	12	8	14	11	7.5	7	7.5	16	9	8	13	12	13	14	12.5	10	11.5	1	1.28571	1.14286	1.2381	1.35714	1.57143	0.809524
C/EBP	12.65	26.485	10.4	11.3967	12.175	6.37	6.05	6.965	11.05	11.105	8.095	10	5.155	10.97	10.24	6.98667	20.85	16.31	11.035	5	11.32	11.58	8.735	3.735	9.15	7.025	13.515	6.74	12.655	8.835	10.01	9.555	13.59	6.475	9.67	11.84	10.7	5.6	11.775	10.17	12.355	9.045	1	2.09368	0.822134	0.900922	0.962451	0.503557	0.478261
Ctnna2	18.95	18.335	5.92	13.95	13.45	12.74	9.34333	4.46	6.31	4.94	17.225	21.57	9.99	1.95	6.71	7.12	8.585	11.545	7.495	8.1	11.19	23.16	30.885	8.115	3.205	5.87	25.42	5.61	17.595	13.26	20.025	7.64	5.32	15.645	7.85	5.52	8.305	16.48	7.165	4.245	5.885	3.175	1	0.967546	0.312401	0.736148	0.709763	0.672296	0.493052
Kcnma1	19.055	4.49	9.615	9.00667	7.3	6.37	8.38667	18.375	17.89	16.31	19.095	16.375	30.76	11.7	6.71	12.7133	21.515	13.16	12.625	14.305	5.595	34.74	20.92	2.185	4.63	7.025	31.84	3.37	11.55	6.31	18.63	6.885	3.715	4.585	2.42	3.95	22.205	7.73	3.75	4.965	1.62	2.32	1	0.235634	0.504592	0.472667	0.383102	0.334295	0.440129
ALDH1A2	25.26	27.855	29.89	14.7233	24.83	6.37	8.38667	8.76	17.01	16.65	15.98	16.27	11.105	7.07	11.65	11.99	17.74	8.235	4.925	11.205	25.63	23.16	13.41	2.185	8.86	4.715	8.365	5.05	7.72	6.315	12.865	14.22	9.095	2.765	9.67	5.52	6.525	9.77	2.55	8.665	4.47	2.845	1	1.10273	1.18329	0.582871	0.982977	0.252177	0.332014
NEG_F	13	14	10.5	12.3333	9	8	9	11.5	15	11.5	11	19	16	11	9	13.6667	10.5	13.5	7	11.5	7.5	10	7	14	13	14.5	16.5	11	11.5	12	12	15.5	11	15	14	18	18.5	19	11.5	13	14.5	11	1	1.07692	0.807692	0.948718	0.692308	0.615385	0.692308
FOXD1	11.395	12.405	4.98	13.76	6.44	19.12	18.5833	16.38	3.86	3.155	21.375	21.675	6.595	3.9	3.795	18.1267	13.985	5.735	16.58	21.885	11.32	34.74	18.085	7.835	3.965	5.95	11.57	9.54	15.44	8.835	24.4	8.845	6.825	12.805	9.06	4.74	8.345	19.305	8.215	6.42	4.575	7.555	1	1.08864	0.437034	1.20755	0.56516	1.67793	1.63083
MMP-3	22.785	37.87	11.415	10.47	9.44	12.74	10.9367	15.305	5.79	4.79	10.17	5.785	4.505	2.68	4.945	14.61	12.41	14.05	2.565	8.1	17.045	23.16	21.535	4.73	6.57	8.18	18.67	14.6	12.12	9.465	38.725	11.11	10.035	9.315	9.06	10.26	7.405	12.555	18.635	10.065	15.125	11.225	1	1.66206	0.500987	0.459513	0.414308	0.55914	0.479994
PTGS2	31.635	8.76	19.935	9.75333	11.545	31.86	15.7167	16.94	8.24	9.14	3.53	17.835	7.575	4.39	5.56	18.5267	13.195	11.51	4.545	9.995	13.79	34.74	20.92	6.28	10.06	8.35	14.78	11.79	7.72	22.08	10.01	9.75	14.875	16.59	29	22.89	11.135	22.085	14.81	12.315	29.57	24.775	1	0.276908	0.630156	0.308308	0.364944	1.00711	0.496813
Nol3	8.82	37.715	4.81	10.4167	3.535	25.49	24.2133	3.92	4.91	4.24	9.755	8.92	12.405	4.15	9.62	25.9267	5.6	13.32	12.035	21.2	5.595	23.16	12.795	22.505	6.55	15.46	11.91	7.3	7.18	15.785	10.01	14.475	8.515	18.34	9.67	15	10.18	12.595	16.05	12	14.275	10.865	1	4.27608	0.545351	1.18103	0.400794	2.89002	2.74528
Thy1	8.85	47.99	12.525	9.72667	7.07	19.12	14.2333	10.155	13.5	16.125	6.435	5.785	13.775	8.05	9.975	8.97	6.685	8.28	10.445	6.895	5.595	34.74	17.47	14.115	9.45	16.53	14.78	14.03	19.24	18.935	12.865	18.445	13.11	9.245	12.08	18.15	26.005	9.77	17.06	16.595	22.045	21.24	1	5.4226	1.41525	1.09906	0.79887	2.16045	1.60829
HPGDS	29.06	22.605	11.185	28.1433	24.37	31.86	25.1667	13.02	10.87	11.685	16.605	15.3	10.385	7.8	14.035	19.79	12.41	11.545	6.315	17.575	13.925	57.9	17.47	11.57	5.82	5.87	16.72	7.3	8.8	9.47	18.63	16.48	9.895	5.605	8.46	11.05	7.44	16.11	7.165	6.96	5.325	7.36	1	0.777873	0.384893	0.968456	0.83861	1.09635	0.866024
Acta2	15.155	44.03	13.215	19.88	18.93	25.49	22.62	26.73	12.63	10.78	23.865	14.7	27.295	14.14	10.855	24.4367	14.41	17.28	15.785	20.68	14.05	34.74	12.795	15.95	10.695	5.87	28.63	6.17	9.935	10.095	24.335	9.75	5.66	12.15	12.08	3.95	7.875	5.97	5.135	5.4	6.08	5.68	1	2.90531	0.871989	1.31178	1.24909	1.68195	1.49258
kcne1L	22.75	42.05	8.75	20.5867	9.035	38.23	28.46	13.535	6.66	6.9	18.885	15.785	16.515	7.8	15.71	24.3033	18.895	22.485	14.985	8.79	27.715	46.32	26.21	9.385	6.21	11.735	26.69	5.05	22.535	10.73	27.185	11.005	4.7	10.99	11.48	3.16	11.545	24.535	8.14	4.18	9.61	7.78	1	1.84835	0.384615	0.904908	0.397143	1.68044	1.25099
ITGax (CD11c)	16.41	10.27	5.06	9.91667	8.095	25.49	17.0967	16.225	8.77	7.845	10.17	6.865	8.945	9.02	11.65	15.4667	12.14	14.98	14.015	31.195	30.19	23.16	22.145	11.65	15.41	11.735	45.355	16.84	17.65	13.255	41.575	16.785	16.04	14.845	10.27	20.52	22.7	22.7	16.42	23.645	23	16.42	1	0.625838	0.308349	0.604306	0.493297	1.55332	1.04184
Wif1	8.85	18.335	9.005	11.8233	14.14	25.49	19.1167	21.065	18.24	18.16	29.475	12.055	13.45	15.36	20.48	31.42	25.14	32.06	32.535	22.575	19.905	69.47	33.715	24.415	19.84	18.84	16.385	15.72	18.165	18.925	24.4	13.12	7.57	9.245	3.62	11.05	6.96	5.97	8.215	4.495	6.175	4.72	1	2.07175	1.01751	1.33597	1.59774	2.88023	2.16008
Sox9	27.805	28.685	24.365	21.3167	13.83	44.61	29.4167	20.325	15.08	14.795	19.095	20.485	19.005	10	15.18	15.8267	21.66	10.9	14.185	18.785	33.565	46.32	17.47	11.295	10.885	12.975	11.57	8.98	11.04	4.415	60.275	9.6	8.59	19.14	9.67	3.95	18.085	11.575	6.6	4.605	7.71	2.325	1	1.03165	0.876281	0.766649	0.497393	1.60439	1.05796
RAGE	37.875	38.58	36.12	32.4633	23.975	44.61	41.95	19.43	20.52	20.415	22.83	14.215	33.105	8.29	16.33	22.9933	22.965	19.905	12.21	18.095	19.39	46.32	8.735	7.2	7.31	7.025	23.48	6.17	24.805	16.395	27.185	13.01	7.01	13.83	12.69	9.47	11.135	6.99	10.05	10.08	11.975	6.615	1	1.01861	0.953663	0.857118	0.633003	1.17782	1.10759
ITgam (CD11b)	26.58	19.25	15.36	20.41	14.14	6.37	21.7667	22.275	16.84	16.79	10.175	30.595	23.51	25.36	18.095	25.88	11.495	15.665	18.35	20.68	30.965	57.9	34.945	13.76	14.405	16.53	19.93	7.3	26.99	11.36	24.265	14.43	17.005	25.1	20.54	18.94	12.905	26.585	22.01	22.345	19.02	36.655	1	0.724229	0.577878	0.767871	0.531979	0.239654	0.818911
MGAT4A	34.11	38.8	19.48	28.1833	16.105	19.12	23.2567	18.175	10	10.58	16.605	31.675	12.805	13.41	17.21	27.4567	10.88	16.55	9.855	20.68	27.845	81.05	16.86	10.66	10.02	21.155	9.965	11.23	25.345	13.25	21.415	20.305	14.855	36.02	21.14	15.78	28.755	25.235	18.935	11.45	19.195	10.14	1	1.1375	0.571094	0.826248	0.472149	0.560539	0.681814
F13A1	51.88	47.835	28.44	45.0033	34.35	70.09	48.1067	14.295	18.06	18.96	20.135	30.975	15.145	9.27	13.15	27.1833	17.39	12.395	8.465	20.68	19.65	46.32	16.86	10.66	14.37	7.11	16.72	15.72	11.58	15.155	22.875	19.095	10.295	22.925	19.33	15	24.49	23.76	20.66	16.89	11.985	35.04	1	0.922032	0.548188	0.867451	0.662105	1.351	0.927268
ERB	17.695	44.885	12.97	24.45	17.215	70.09	35.15	17.995	9.29	7.325	25.32	11.565	22	10	13.415	34.72	20.255	14.855	9.855	9.995	33.825	23.16	16.86	6.64	11.77	19.915	41.805	11.79	12.095	21.455	54.505	35.58	22.325	20.085	20.54	18.15	25.55	33.945	16.575	17.515	20.835	19.205	1	2.53659	0.732975	1.38175	0.972874	3.96101	1.98644
NME7	25.325	28.925	37.865	42.0067	28.22	31.86	37.7	20.73	32.44	32.845	28.025	29.405	18.355	19.02	18.625	19.7067	32.095	25.395	21.47	54.46	25.37	46.32	8.735	17.295	22.435	20.085	8.365	19.09	24.235	15.765	25.725	22.67	21.3	15.79	19.94	16.57	20.32	12.885	17.17	19.33	22.065	19.95	1	1.14215	1.49516	1.6587	1.11431	1.25805	1.48865
Claudin 1	48.01	43.835	49.34	42.44	24.43	44.61	39.5067	23.53	18.41	18.245	18.68	23.73	21.025	15.12	10.855	30.6133	21.705	10.82	21.125	12.58	27.975	57.9	17.47	20.755	18.255	29.505	29.895	27.51	41.835	21.45	12.865	24.38	22.865	25.975	25.37	18.15	25.465	19.63	19.8	17.205	22.725	17.95	1	0.913039	1.0277	0.883983	0.508852	0.929181	0.822884
RARA RARBRARG Retinoic acid receptors alpha beta gamma	6.31	24.365	29.86	11.1567	16.65	19.12	11.47	19.83	29.64	29.55	24.91	10	28.015	23.17	16.945	27.8167	31.925	29.23	25.22	13.785	33.565	11.58	17.47	19.13	48.59	23.465	40.78	43.79	16.545	36.6	44.36	18.61	25.395	14.845	46.52	36.3	36.96	18.485	53.84	33.595	24.64	31.575	1	3.86133	4.73217	1.76809	2.63867	3.03011	1.81775
Serpina3	34.11	39.19	22.52	14.9767	12.655	31.86	20.39	19.785	12.45	13.7	22.21	27.84	22.725	11.95	13.77	32.0567	12.58	27.375	17.93	29.985	38.905	69.47	34.33	32.61	13.375	22.31	46.275	26.94	23.13	29.025	55.83	41.86	24.575	31.65	25.98	39.46	23.145	32.1	24.145	25.01	18.83	19.6	1	1.14893	0.660217	0.43907	0.371006	0.934037	0.597772
ABCG2	25.225	42.295	36.99	37.9633	21.895	19.12	18.16	35.02	47	46.26	30.51	23.135	18.68	52.43	12.005	18.5333	34.32	28.38	23.655	21.885	19.515	34.74	16.86	17.655	46.835	17.515	17.985	26.38	22.055	27.75	42.9	23.44	37.22	13.97	44.71	35.51	34.69	18.855	39.37	33.9	34.34	33.075	1	1.67671	1.4664	1.50499	0.867988	0.757978	0.719921
PCYOX1	40.45	27.635	33.4	21.8967	33.24	57.35	39.5067	38.005	29.81	31.865	29.685	38.92	19.4	26.82	28.95	26.9233	26.2	35.165	35.87	41.355	14.05	34.74	24.98	36.145	24.395	32.715	26.69	21.89	43.565	19.57	45.815	24.935	26.48	27.725	21.75	39.46	31.875	23.11	22.16	28.405	33.77	23.285	1	0.683189	0.825711	0.541327	0.821755	1.4178	0.976679
MUC5Ab	27.805	39.36	13.06	51.1967	9.44	286.75	247.327	10.155	214.48	203.31	16.815	4.22	23.835	4.15	6.71	11.4533	11.52	14.13	6.315	8.79	22.51	23.16	8.735	2.82	5.28	4.715	9.965	17.96	2.75	9.475	15.78	9.145	5.36	10.19	15.1	5.52	10.16	8.055	5.585	7.9	5.425	6.335	1	1.41557	0.4697	1.84128	0.339507	10.3129	8.89504
EPHA7	30.41	60.705	35.715	32.4133	37.005	38.23	36.2133	37.465	37.88	38.915	42.345	32.05	27.765	31.7	38.485	43.4233	50.325	28.02	32.33	46.875	33.955	34.74	42.455	20.955	22.32	21.155	35.39	20.21	33.035	33.45	34.345	28.345	25.795	37.04	21.75	22.89	24.085	42.74	20.36	21.97	23.01	18.52	1	1.99622	1.17445	1.06588	1.21687	1.25715	1.19084
LRAT	27.87	21.605	11.915	13.4933	8.41	19.12	10.3	33.995	5.96	5.435	22	15.3	15.22	6.1	12.005	19.4267	9.99	14.935	7.285	23.095	27.975	92.63	25.595	18.495	9.81	9.34	21.535	11.79	22.535	28.4	64.45	35.38	22.265	49.775	29.6	41.04	31.95	235.57	62.915	87.67	40.715	30.54	1	0.775206	0.427521	0.484153	0.301758	0.686042	0.369573
IGF1	26.58	34.48	25.15	44.6567	34.75	25.49	23.3667	56.135	41.91	39.365	38.405	23.62	40.17	48.28	53.4	56.63	37.055	37.91	42.185	49.455	67.78	104.21	26.21	22.865	41.935	41.24	29.55	20.21	26.45	19.56	47.275	25.98	12.33	14.845	17.52	9.47	18.54	17.835	15.595	12.305	15.98	11.055	1	1.29722	0.9462	1.68009	1.30737	0.958992	0.879107
GUCY1A2 sGC(soluble guanylate cyclase) (PMID 23934926)	31.535	52.965	27.735	29.2233	21.75	12.74	8.17333	25.185	23.68	22.885	31.135	23.62	41.725	38.77	18.975	47.0733	26.79	41.58	42.39	27.405	27.715	104.21	32.11	38.61	45.86	43.55	31.5	48.84	51.23	55.525	54.37	49.16	41.295	27.725	45.31	26.83	36.62	38.44	42.405	32.685	31.09	28.42	1	1.67956	0.879499	0.926695	0.68971	0.403996	0.259183
Shisa3	25.225	58.33	22.815	37.19	32.555	31.86	45.24	56.42	49.98	51.325	72.04	63.13	68.05	41.94	36.805	85.1267	60.045	36.575	35.695	31.36	33.44	127.37	36.17	25.49	20.815	39.095	19.93	11.79	32.47	25.24	17.175	19.7	16.22	23.285	12.69	12.63	15.805	27.32	13.01	14.475	15.225	14.34	1	2.31239	0.90446	1.47433	1.29058	1.26303	1.79346
PRIM2	53.17	34.195	35.715	41.46	25.545	89.21	71.0433	53.33	41.56	42.76	38.19	48.54	34.87	35.85	40.865	40.4933	43.57	30.605	32.92	50.665	30.835	34.74	37.78	35.99	30.05	22.23	49.825	23.02	35.845	25.24	37.265	24.285	20.635	36.09	26.58	33.94	27.33	18.855	32.77	26.3	31.66	25.66	1	0.643126	0.671713	0.779763	0.48044	1.67783	1.33615
TTF-1	27.735	68.92	36.375	46.8033	33.465	25.49	26.1267	29.44	41.39	41.895	28.64	37.46	19.4	32.68	19.86	39.6767	38.905	33.59	39.44	38.255	33.7	34.74	48.355	38.815	36.23	39.825	53.375	33.12	42.97	41.025	31.495	52.22	47.035	45.265	49.54	33.94	42.155	37.465	46.87	33.205	35.66	28.82	1	2.48495	1.31152	1.68752	1.2066	0.919055	0.942011
EPHA3	75.715	98.985	93.645	92.21	91.565	76.47	61.49	92.925	47.18	50.59	35.5	56.86	47.205	37.55	45.545	42.61	42.705	19.095	33.715	14.305	11.19	81.05	12.795	19.48	19.785	22.395	45.355	20.77	23.13	17.68	28.575	29.3	18.07	20.3	19.94	13.42	18.55	18.855	12.635	18.96	20.66	13.525	1	1.30734	1.23681	1.21786	1.20934	1.00997	0.812124
THTPA	51.74	47.19	52.88	38.25	58.61	44.61	43.12	59.405	48.05	44.22	57.08	37.35	48.72	41.21	28.685	54.5133	45.96	44.125	38.85	31.36	55.95	46.32	16.86	42.91	40.085	52.885	41.805	43.22	43.54	46.06	32.955	56.79	30.33	44.32	33.83	37.88	41.205	39.875	34.23	35.265	29.945	27.1	1	0.91206	1.02203	0.739273	1.13278	0.862196	0.833398
tbp	41.775	37.21	30.36	35.1733	24.83	57.35	52.8867	36.93	26.13	25.115	39.44	42.16	17.96	42.92	37.07	46.1733	35.895	34.72	38.055	40.15	53.085	34.74	78.625	52.93	26.265	50.66	56.92	32.56	56.22	47.96	68.625	46.99	48.32	51.885	35.64	48.14	45.835	52.845	36.78	43.38	52.84	41.49	1	0.890724	0.72675	0.841971	0.594375	1.37283	1.26599
hprt	45.54	51.595	39.52	33.2167	26.31	31.86	32.9233	36.41	36.65	34.505	66.215	28.915	51.135	34.38	55.255	51.1767	38.61	61.245	45.545	68.765	59.07	81.05	58.085	49.905	35.985	43.295	57.265	44.91	47.34	41.025	47.275	49.405	24.21	36.09	33.83	37.09	35.65	59.175	31.835	33	31.935	29.685	1	1.13296	0.867809	0.729395	0.577734	0.699605	0.722954
Claudin 3	87.14	66.78	85.525	60.0867	57.22	57.35	56.0733	39.26	53.66	50.82	35.08	36.27	50.69	32.43	50.755	52.7533	38.165	55.47	57.37	34.465	27.715	46.32	59.31	30.7	31.25	53.14	25.085	57.26	48.505	42.28	38.59	42.425	39.665	39.07	73.7	38.67	35.145	39.915	36.405	38.73	41.64	34.755	1	0.766353	0.981467	0.689542	0.656644	0.658136	0.643486
P4HA3	36.685	15.76	28.39	27.1233	31.585	19.12	35.0467	48.915	42.79	45.945	68.085	52.54	88.49	41.21	40.605	79.3667	96.16	122.85	82.175	95.48	98.235	115.79	110.12	54.36	82.86	87.185	47.875	41.54	44.105	22.71	15.715	18.19	8.875	19.21	10.27	12.63	1.855	12.595	10.8	7.39	9.795	6.775	1	0.429603	0.773886	0.739358	0.860979	0.521194	0.955341
Dnmt3a	70.735	44.24	66.625	41.4867	52.315	76.47	45.0333	49.61	45.77	48.55	48.16	35.785	56.755	43.89	44.665	57.93	46.28	54.74	73.57	38.775	67.395	69.47	61.155	64.735	47.005	62.56	56.24	57.82	47.37	64.375	68.76	58.055	40.795	33.4	44.1	37.09	34.28	32.23	38.09	26.085	22.345	21.85	1	0.625433	0.941896	0.586508	0.739591	1.08108	0.636649
ABCD1	51.74	34.785	119.645	42.27	38.17	50.98	52.3533	32.67	49.46	49.945	48.99	32.05	52.365	34.14	41.13	60.1033	44.26	63.305	43.15	46.355	58.94	69.47	42.455	53.645	36.98	55.365	43.41	49.96	57.305	39.765	78.635	68.15	45.79	48.17	50.75	46.56	43.055	49.285	48.93	49.42	35.655	48.49	1	0.672304	2.31243	0.816969	0.737727	0.985311	1.01185
CD68	35.335	35.33	45.125	81.1767	51.375	114.7	77.1	45.37	58.93	57.585	40.06	36.375	41.47	51.45	46.955	39.4067	41.645	34.115	35.9	37.045	36.43	46.32	30.27	31.135	66.16	41.24	47.3	34.8	64.48	47.98	51.52	45.595	48.24	61.2	54.98	71.03	55.645	74.76	70.56	101.665	84.58	78.095	1	0.999858	1.27706	2.29734	1.45394	3.24607	2.18197
CTPS2	92.295	43.02	54.7	57.5567	38.17	108.33	70.5167	56.04	47.35	47.22	48.16	69.405	49.765	35.6	33.275	57.31	49.86	53.975	42.945	58.25	58.42	34.74	51.805	52.53	43.745	57.68	51.085	37.05	66.075	56.15	91.7	60.56	43.46	55.74	51.35	52.88	56.065	63.925	52.155	44.905	42.13	43.465	1	0.466114	0.592665	0.623616	0.413565	1.17374	0.764036
EGFR (Epidermal growth factor receptor) (PMID 22916088 22245996)	167.23	64.51	88.75	99.2233	123.655	76.47	98.5533	120.025	54.89	54.67	129.765	97.03	59.825	37.8	42.895	56.9933	63.745	116.08	48.67	61.35	56.075	46.32	57.705	46.325	89.08	64.615	46.275	55.57	96.79	130.15	93.025	42.67	62.415	32.24	60.41	48.93	131.53	46.83	51.44	45.985	131.055	165.91	1	0.385756	0.530706	0.593335	0.739431	0.457274	0.589328
Robo1	74.525	66.39	65.44	55.5867	48.295	95.58	62.7633	78.265	72.78	72.32	109.385	102.535	63.145	71.45	59.58	69.8867	95.47	63.825	80.615	85.13	67.655	46.32	38.39	47.595	52.45	49.165	58.185	54.45	69.445	38.505	38.59	46.385	42.2	24.23	38.66	26.83	24.94	25.52	24.26	24.045	35.005	24.66	1	0.890842	0.878095	0.745879	0.648038	1.28252	0.842178
hmbs	74.525	61.525	69.025	73.7633	69.87	57.35	55.2233	67.29	63.66	66.645	75.35	65.19	56.685	73.16	59.58	52.71	73.145	54.58	61.47	70.66	55.95	81.05	44.295	44.895	55.295	54.13	46.275	42.66	84.21	50.49	70.15	60.66	35.835	49.775	50.14	38.67	40.35	36.4	42.405	39.595	34.42	48.75	1	0.825562	0.926199	0.98978	0.937538	0.76954	0.741004
PHGDH	61.85	354.6	75.695	76.3167	36.63	63.72	50.6567	58.955	56.12	47.81	41.515	52.65	46.3	40.24	30.275	45.2267	58.69	30.28	37.605	47.045	30.835	46.32	51.805	47.085	39.24	31.65	44.67	45.47	34.71	28.4	51.52	57.15	33.585	28.525	50.75	26.04	39.765	47.975	44.39	32.315	39.78	33.975	1	5.73323	1.22385	1.2339	0.592239	1.03023	0.819025
Claudin 7	49.2	56.275	59.645	54.25	44.215	70.09	64.5633	44.28	56.82	54.63	52.515	42.54	96.785	37.07	36.545	68.4867	62.12	100.53	80.475	45.665	85.875	104.21	55.25	62.87	50.325	63.8	48.22	67.92	45.725	48.6	77.31	57.995	34.93	34.415	53.77	44.99	37.985	60.855	62.69	37.43	44.805	32.915	1	1.1438	1.2123	1.10264	0.898679	1.42459	1.31226
GUSB	79.545	46.53	63.265	75.13	90.995	63.72	52.1433	85.325	68.75	67.74	57.7	64.215	51.925	56.82	45.9	58.48	52.305	53.615	58.965	79.965	64.405	34.74	78.625	55.91	60.25	63.72	73.64	59.5	72.685	57.415	28.645	58.86	50.67	64.035	51.96	48.14	44.945	47.85	43.905	50.43	48.67	60.015	1	0.584952	0.795336	0.944497	1.14394	0.801056	0.65552
Lrp2	27.805	35.005	28.17	42.5133	41.31	70.09	55.1167	30.675	40.51	38.775	18.27	30.485	38.405	33.9	34.16	49.6867	55.04	45.66	41.625	24.99	52.83	11.58	63.985	47.84	58.155	48.26	61.05	49.4	35.225	61.855	91.565	85.69	78.955	78.735	146.2	78.92	107.36	129.4	119.98	113.26	105.91	105.285	1	1.25895	1.01313	1.52898	1.4857	2.52077	1.98226
pgk1	53.135	68.37	60.05	51.8333	46.58	76.47	77.5267	42.325	59.8	59.69	54.39	55.89	78.69	57.55	74.055	72.01	75.17	56.6	55.78	62.56	63.89	104.21	48.355	69.035	61.425	78.92	79.375	61.75	45.24	49.835	67.3	42.47	39.85	37.11	59.81	47.35	58.785	55.375	49.645	44.285	45.375	42.15	1	1.28672	1.13014	0.975503	0.876635	1.43916	1.45905
NFATC3	97.21	85.91	73.675	74.39	84.41	70.09	73.91	75.355	50.86	54.665	88.01	57.73	55.965	68.52	57.55	45.8567	71.49	32.3	68.61	73.24	47.365	57.9	24.98	54.79	63.5	57.765	55.66	54.45	74.93	65.02	67.235	54.195	61.33	54.865	64.04	80.5	64.29	57.295	58.53	60.025	58.37	49.705	1	0.883757	0.757895	0.76525	0.868326	0.721016	0.760313
Src	50.39	55.355	67.225	31.8567	42.11	63.72	56.4967	32.2	69.27	63.87	42.14	40.97	52.505	57.31	43.87	82.0233	70.14	77.555	64.63	72.555	53.86	115.79	25.595	76.825	78.66	81.065	41.46	88.13	60.625	68.8	104.43	77.205	71.91	58.72	87	73.4	67.105	62.615	79.34	52.865	53.345	41.055	1	1.09853	1.33409	0.632202	0.835682	1.26454	1.12119
FSP1 (S100a4)	54.285	91.085	50.75	56.15	37.09	50.98	54.16	48.555	51.74	51.535	51.06	33.73	68.44	67.3	36.455	55.5067	54.005	46.345	51.235	37.565	72.86	81.05	75.18	56.03	96.3	50.32	74.91	56.14	54.575	59.95	83.015	74.845	72.35	71.885	79.75	81.29	65.25	64.62	95.57	109.455	60.405	142.575	1	1.6779	0.934881	1.03436	0.683246	0.939118	0.997697
Epcam	98.635	107.2	103.63	87.9233	70.76	82.84	79.7567	89.745	76.81	76.01	70.99	61.35	61.45	54.62	43.87	57.3967	77.955	48.93	63.27	64.62	61.28	104.21	58.085	55.83	57.02	63.55	69.415	73.54	42.97	69.42	64.315	46.35	55.19	51.01	77.93	59.19	51.4	48.59	67.34	58.925	67.305	49.41	1	1.08684	1.05064	0.891401	0.717392	0.839864	0.808604
ipo8	55.575	73.21	78.72	68.3067	58.785	70.09	65.7333	53.6	72.78	79.015	88.22	69.295	71.435	59.74	42.72	68.1733	80.25	65.97	73.745	59.97	58.81	92.63	66.44	56.19	59.315	70.74	49.825	64.56	77.65	62.46	58.615	83.03	66.35	88.85	73.1	51.3	60.2	65.025	57.93	61.915	62.35	66.705	1	1.31732	1.41646	1.22909	1.05776	1.26118	1.18279
FGF18	53.17	49.155	51.55	41.0867	52	38.23	42.16	71.77	71.9	75.005	88.645	62.055	57.8	79.01	63.64	90.63	123.2	144.535	141.67	108.91	66.62	196.84	97.705	93.885	123.135	95.45	81.905	55.57	87.53	58.69	41.505	43.52	21.8	27.865	35.04	16.57	31.08	25.15	30.56	25.995	16.75	16.335	1	0.924487	0.969532	0.772742	0.977995	0.719014	0.792928
POS_F	56.5	88	65	61.6667	58.5	73	48	43.5	76	71.5	70.5	70.5	66.5	91	68.5	67	63.5	77.5	53.5	49	59	54	52	67.5	94	78	66.5	88	69	51	60	73.5	67.5	71.5	79	96	90.5	86	106.5	97	76	66	1	1.55752	1.15044	1.09145	1.0354	1.29204	0.849558
NME3	53.065	90.93	59.645	49.8033	41.54	101.96	75.6167	35.715	66.12	67.09	56.665	48.43	72.485	43.65	44.31	80.84	81.83	81.31	79.64	64.455	84.175	81.05	110.12	67.76	73.05	88.51	90.95	92.06	81	72.57	81.485	75.5	72.455	74.95	83.97	68.66	80.115	60.16	77.16	69.58	60.405	60.275	1	1.71356	1.124	0.938535	0.782814	1.92142	1.42498
N-Cadherin(CDH2)	60.625	69.785	72.815	61.83	56.48	44.61	72.96	94.585	124.34	124.32	88.01	93.025	131.005	87.79	80.585	110.787	135.535	112.765	124.565	83.235	84.695	196.84	87.36	88.47	107.065	59.91	65.285	78.03	94.74	80.165	87.325	40.685	64.58	64.76	54.37	53.67	42.66	46.215	38.015	36.445	41.065	45.3	1	1.15109	1.20107	1.01988	0.931629	0.735835	1.20346
LFNG (Lunatic Fringe) (PMID 19897741)	68.225	84.955	68.63	61.79	71.835	50.98	67.1167	56.845	89.62	81.185	102.325	71.355	84.63	89.01	69.2	113.487	102.63	104.08	88.04	63.415	56.335	46.32	70.505	57.895	72.035	96.515	60.71	106.66	104.05	105.39	108.875	128.07	90.035	100.925	189.09	107.33	143.96	82.205	139.625	113.42	89.575	95.365	1	1.24522	1.00594	0.90568	1.05291	0.747233	0.983755
KRT18	234.16	184.37	184.345	131.14	108.59	152.93	151.753	75.69	81.9	76.99	71.405	57.835	86.795	53.89	58.435	92.4367	85.995	88.45	71.59	85.3	59.195	57.9	87.36	73.05	52.035	72.15	36.31	71.29	62.325	61.2	103.105	62.22	56.73	77.715	100.89	81.29	106.115	84.74	76.935	77.025	73.77	55.67	1	0.787368	0.787261	0.560044	0.463743	0.6531	0.648075
TBX4	59.405	57.425	65.86	32.95	39.97	19.12	53.0967	56.485	77.69	73.435	122.05	62.54	109.77	83.15	106.535	119.52	100.34	133.715	115.275	111.495	95.5	127.37	112.34	119.05	110.595	167.43	124.39	127.43	105.24	70.055	85.865	96.705	67.87	70.435	80.95	82.08	61.5	83.965	83.72	58.03	49.285	44.58	1	0.966669	1.10866	0.554667	0.672839	0.321858	0.893808
GATA-6	139.055	102.93	140.475	127.35	123.92	70.09	99.08	89.38	111.71	118.565	117.065	96.265	96.18	92.91	103.89	85.4433	99.045	82.24	98.965	81.51	50.225	162.11	52.415	75.11	83.205	70.315	67.81	115.64	103.08	81.43	94.485	91.435	70.445	79.895	106.33	87.6	84.72	80.45	84.51	80.54	57.055	63.005	1	0.740211	1.01021	0.915825	0.891158	0.504045	0.712524
tfrc	88.295	49.82	77.845	118.967	70.5	95.58	87.6133	106.03	98.91	101.115	89.46	59.51	69.745	96.08	82.88	84.0933	107.285	78.315	100.97	112.015	105.91	34.74	57.705	75.625	126.275	78.83	65.52	101.6	87.505	112.345	88.715	124.4	118.1	86.23	127.47	111.28	107.36	97.375	114.245	119.75	108.725	89.525	1	0.564245	0.881647	1.34738	0.79846	1.08251	0.99228
BCL2A1	102.265	135.615	114.34	180.803	128.825	89.21	133.387	105.695	80.32	84.345	72.865	48.22	60.15	99.74	64.17	75.84	99.64	58.055	68.995	75.305	73.12	57.9	73.335	62.985	104.785	59.74	80.645	59.5	98.575	87.105	120.21	101.885	86.34	106.89	112.37	104.18	107.23	145.845	101.27	166.545	147.885	119.775	1	1.32611	1.11808	1.76799	1.25972	0.872341	1.30432
Igfbp3	237.795	236.97	233.38	78.05	73.525	101.96	92.0767	60.48	56.82	60.1	27.815	41.57	64.655	17.31	15.535	30.6633	44.9	49.54	48.525	26.365	56.075	81.05	82.685	66.285	41.94	71.165	99.99	135.29	67.21	159.04	216.155	81.385	117.88	126.175	183.05	164.95	153.835	168.01	150.425	100.83	90.79	124.72	1	0.996531	0.981434	0.328224	0.309195	0.428773	0.38721
GFPT1	126.34	99.635	121.825	98.4967	116.8	127.44	112.993	90.545	129.43	137.13	85.935	65.89	109.84	82.42	51.195	94.64	154.87	147.325	118.46	127.695	133.76	81.05	78.625	105.735	133.685	106.84	115.69	108.9	77.65	102.875	138.775	77.215	76.685	75.385	109.95	97.07	104.125	79.34	97.185	79.625	75.7	83.04	1	0.788626	0.964263	0.779616	0.924489	1.00871	0.894359
FOXF2	29.025	53.12	40.085	42.8633	43.62	76.47	55.33	59.245	90.67	82.155	109.4	77.35	140.74	97.05	69.025	120.027	181.6	153.495	188.395	120.8	83.925	196.84	180.39	143.945	193.74	172.305	129.545	210.51	88.155	72.565	103.035	101.94	66.99	60.035	85.18	96.28	70.305	52.105	101.495	72.655	40.79	58.37	1	1.83015	1.38105	1.47677	1.50284	2.63463	1.90629
CD38	51.845	82.275	71.235	53.9167	41.31	31.86	38.5467	49.315	67.17	66.5	59.155	44.105	64.655	62.67	47.31	62.99	101.32	119.99	119.32	54.625	86.655	138.95	90.195	87.4	103.525	128.76	127.94	131.36	109.07	178.595	207.6	178.19	136.91	143.64	123.24	202.83	113.79	173.245	170.185	135.145	122.05	93.555	1	1.58694	1.374	1.03996	0.796798	0.614524	0.743498
SMAD3	155.295	117.23	141.54	105.743	125.01	114.7	97.0633	114.43	126.27	125.62	135.96	92.055	138.715	97.79	91.09	109.263	146.17	191.45	113.57	148.205	110.45	92.63	132.645	134.915	124.165	106.025	137.565	111.15	100.245	95.31	100.05	104.69	79.655	86.085	96.06	82.08	95.335	77.665	90.36	74.58	67.885	59.095	1	0.754886	0.911427	0.680919	0.804984	0.738594	0.625025
PRDX3	161.87	134.57	167.795	173.893	133.61	172.05	158.767	142.265	102.77	111.86	112.92	126.27	94.3	107.54	76.175	87.74	119.965	90.95	114.955	118.22	103.825	127.37	64.6	108.16	96.5	118.915	95.18	73.54	149.315	93.41	110.265	87.21	92.005	106.455	102.7	104.18	121.105	101.305	114.615	96.6	112.03	89.385	1	0.831346	1.0366	1.07428	0.825415	1.06289	0.980828
PRSS35	37.875	67.245	42.245	82.6	105.48	82.84	95.05	204.89	210.1	200.9	277.125	214.38	253.535	272.14	252.27	274.18	290.235	243.525	329.46	211.62	173.825	115.79	136.33	139.57	178.005	122.215	87.5	39.29	101.865	29.65	44.425	26.325	10.155	27.58	14.5	11.05	11.555	16.48	11.55	9.03	11.52	11.925	1	1.77545	1.11538	2.18086	2.78495	2.18719	2.50957
TST	287.975	217.85	273.85	291.537	239.835	146.56	152.287	171.42	151.52	161.565	110.84	112.645	156.28	93.88	53.49	126.877	150.455	124.225	114.155	94.775	117.615	185.27	100.16	100.88	102.125	97.675	80.98	140.9	131.125	115.51	102.97	90.635	106.54	94.67	147.41	133.38	124.025	88.05	109.255	131.695	108.375	91.16	1	0.756489	0.950951	1.01237	0.832833	0.508933	0.528819
EXT1	131.29	106.915	132.475	112.893	153.29	127.44	136.673	219.325	145.39	156.155	178.93	156.27	192.965	181.67	146.88	195.867	181.89	124.105	175.94	193.19	109.03	150.53	126.98	155.16	153.72	155.695	115.11	111.71	152.155	112.96	113.115	101.095	98.67	93.43	103.91	82.87	106.01	72.02	104.795	84.11	87.59	86.62	1	0.814342	1.00903	0.859878	1.16757	0.970676	1.041
PDGFRb	54.32	53.985	53.63	49.8267	66.735	89.21	79.22	51.31	68.57	74.675	111.255	76.755	179.26	75.59	82	161.74	111.535	178.935	211.385	122.695	172.92	208.42	278.71	228.41	148.515	236.67	211.205	209.38	109.61	169.78	241.88	174.595	108.805	117.435	103.91	150.74	121.49	145.595	109.63	101.81	77.995	74.345	1	0.993833	0.987297	0.91728	1.22855	1.6423	1.45839
ATP1B1	264.41	328.235	381.29	168.573	154.695	159.31	119.903	89.625	109.43	112.735	78.045	78.215	88.375	100.96	76.525	101.68	125.69	90.27	111.735	66.35	67.655	162.11	83.915	70.105	93.98	83.375	75.145	136.41	82.03	133.775	153.03	156.645	238.61	181.77	264.61	146.79	226.17	134.145	205.46	187.24	270.36	192.085	1	1.24139	1.44204	0.637545	0.585057	0.602511	0.453475
DLK1	905.59	1699.07	903.04	171.983	102.86	197.54	179.367	165.165	256.22	271.045	146.74	144.97	337.605	62.91	65.23	57.08	65.645	39.965	19.495	40.84	19.775	11.58	22.145	15.95	7.56	11.905	21.875	7.3	11.58	13.255	21.415	11.31	7.845	17.465	6.04	8.68	13.475	15.415	7.8	4.72	11.32	4.515	1	1.8762	0.997184	0.189913	0.113583	0.218134	0.198066
TGFB1	144.005	82.81	174.465	142.353	144.365	159.31	149.423	154.945	140.3	144.91	145.51	138.105	226.86	141.68	140.17	155.887	153.715	199.435	171.495	153.72	171.09	150.53	147.9	187.81	192.04	195.61	134.595	217.24	184.025	236.065	246.125	190.715	169.995	179.73	187.28	212.3	199.705	133.775	226.98	160.425	156.47	179	1	0.575049	1.21152	0.98853	1.0025	1.10628	1.03763
Hist1h2ab	55.71	224.28	26.445	80.4333	72.755	127.44	198.693	457.6	339	338.545	549.695	456.92	169.915	442.11	418.13	356.783	272.99	141.54	290.69	342.935	200.485	220	112.34	136.595	179.235	167.09	95.415	109.46	185.615	86.46	64.315	52.37	35.875	37.11	32.62	33.94	37.525	18.485	37.19	57.55	78.935	55.14	1	4.02585	0.47469	1.44379	1.30596	2.28756	3.56656
PDGFRA (platelet-derived growth factor receptor alpha) (PMID 23748534) (Most important)	80.905	85.36	95.58	72.9433	63.345	50.98	68.39	90.545	88.74	89.785	133.265	75.08	101.48	80.23	89.945	101.773	140.64	180.87	164.45	161.3	148.195	150.53	197.86	185.615	163.435	174.28	221.07	197.6	207.1	266.31	390.53	302.825	313.11	308.015	196.95	303.85	248.89	312.585	230.175	193.63	180.76	180.705	1	1.05506	1.18139	0.901592	0.782955	0.630122	0.845312
ADAMTSL2	128.81	140.5	129.175	54.5067	32.615	25.49	24.2133	31.235	28.59	26.345	42.555	36.755	33.5	29.26	28.335	55.5067	89.745	196.455	167.54	147.685	120.995	220	146.67	155.395	152.43	242.71	309.49	276.75	226.51	473.995	661.33	383.395	459.67	313.7	186.07	224.93	195.66	219.91	210.785	143.71	282.31	162.66	1	1.09075	1.00283	0.423156	0.253202	0.197888	0.187977
FGFR2	281.395	225.395	247.155	205.617	221.19	178.42	179.47	174.1	178.36	181.345	191.18	118.215	209.9	138.75	119.515	179.233	213.045	195.765	157.135	159.745	148.84	81.05	150.12	127.365	130.69	170.56	117.87	193.67	135.525	229.66	211.98	202.38	213.615	191.37	266.42	223.35	206.935	197.125	195.375	178.02	211.2	165.91	1	0.800991	0.878321	0.730705	0.786048	0.634055	0.637787
TCF12	263.83	195.845	247.845	215.297	220.875	203.91	205.173	247.06	223.95	241.745	272.14	163.895	232.18	204.35	172.92	173.46	280.465	201.34	226.27	216.78	171.35	196.84	227.52	168.63	190.845	213.375	171.585	183	183.46	196.315	127.235	146.385	159.195	139.785	151.03	149.16	145.9	133.12	166.805	129.33	133.235	141.7	1	0.742315	0.939412	0.816043	0.837187	0.772884	0.777672
HIF1alpha	270.105	267.5	255.01	238.007	210.22	261.26	246.91	272.47	265.69	267.41	263.615	217.24	205.37	221.91	149.7	197.713	244.97	211.59	199.25	238.855	168.87	208.42	157.25	164.98	206.74	166.325	174.555	180.75	235.74	186.805	168.88	170.55	163.67	137.31	198.76	176	164.76	187.76	170.93	166.775	186.39	179.96	1	0.990356	0.944114	0.881163	0.77829	0.967253	0.914126
integrin subunit alpha 8	186.66	119.575	172.09	104.887	92.105	146.56	108.853	115.755	127.32	120.79	85.53	109.995	207.535	124.12	114.13	121.287	183.59	189.39	148.11	148.89	129.195	127.37	167.59	198.505	218.92	226.435	168.72	326.14	271.64	322.48	329.07	278.295	360.105	229.355	341.94	317.26	273.395	254.71	354.87	267.815	282.21	227.245	1	0.640603	0.921944	0.561913	0.493437	0.785171	0.583164
ABCA3	188.355	276	269.31	242.383	186.505	114.7	129.88	120.595	238.33	230.3	170.19	81.835	143.945	230.2	149.615	185.087	217.175	154.385	229.155	117.865	123.08	150.53	139.165	165.015	209.585	222.625	168.72	288.53	164.13	212.705	161.515	285.68	305.5	225.5	338.32	241.5	244.985	190.05	271.15	281.34	233.18	273.46	1	1.46532	1.4298	1.28684	0.990178	0.608956	0.689549
E-Cadherin (CDH1)	346.77	287.135	372.71	185.223	221.145	165.68	214.94	152.695	272.18	258.715	147.17	120.755	205.255	141.68	143.35	241.763	267.995	273.33	200.525	166.64	171.35	173.69	188.51	165.26	240.23	181.815	169.06	268.33	142.73	241.71	313.42	188.79	196.575	162.915	255.55	247.02	228.24	174.145	227.655	179.595	191.61	206.6	1	0.828027	1.0748	0.534139	0.637728	0.477781	0.619834
POS_E	167.5	268	191.5	148.333	147.5	191	127.333	125.5	249	203	184.5	146	218	294	190	206.333	203.5	185.5	142	127	192.5	128	131	218.5	267	245.5	219	243	202.5	155.5	165	223.5	232.5	181.5	230	267	220	239	328	351	257.5	171	1	1.6	1.14328	0.885572	0.880597	1.1403	0.760199
Aqp5(Aquaporin)	127.625	150.615	150.665	104.157	147.045	152.93	132.64	96.57	110.31	108.155	168.35	113.895	272.835	129	231.44	211.383	213.125	385.565	260.64	271.24	209.995	162.11	321.02	287.27	203.92	249.39	325.05	262.15	176.85	288.4	513.735	189.495	229.255	226.225	332.88	265.97	267.725	311.885	382.24	283.995	235.02	197.745	1	1.18014	1.18053	0.816115	1.15216	1.19828	1.03929
Chi3l3/Chi3l4	55.505	53.705	38.74	42.14	41.675	31.86	50.6533	39.415	11.22	9.515	21.38	18.435	17.24	29.02	33.54	28.0467	83.28	51.225	229.145	51.87	227.555	92.63	122.685	34.035	792.9	295.565	961.035	96.55	128.425	114.23	221.79	373.3	335.845	775	322	484.58	494.75	524.31	423.635	759.86	658.065	453.6	1	0.96757	0.697955	0.759211	0.750833	0.574002	0.91259
ALDH1A1 (PMID 11751205)	355.315	109.73	366.97	442.923	302.11	267.63	323.153	258.585	268.85	263.86	96.51	93.24	171.71	130.71	87.12	164.18	161.73	90.265	139.93	90.65	184.755	185.27	97.325	104.465	154.045	155.355	88.08	531.6	225.21	208.26	374.885	323.28	445.985	297.23	431.35	662.15	365.18	199.5	656.17	541.28	627.465	307.365	1	0.308825	1.0328	1.24657	0.85026	0.753219	0.909484
polr2a	471.345	375.075	472.375	421.003	375.725	286.75	329.637	338.97	284.98	294.91	300.37	326.05	272.325	254.34	223.145	213.543	266.875	230.16	235.15	229.195	215.205	370.53	183.835	219.095	230.94	249.82	168.375	240.26	278.68	259.365	226.165	296.37	290.025	282.48	236.82	233.61	259.545	224.24	213.41	236.15	229.27	249.045	1	0.795755	1.00219	0.893196	0.797134	0.608365	0.699353
rplp2	275.225	449.25	407.93	303.937	279.12	267.63	255.933	272.45	426.16	431.445	354.74	220.815	279.385	316.52	312.115	333.54	337.63	270.535	346.545	306.575	238.1	370.53	228.985	239.26	290.68	247.08	144.215	303.69	321.36	253.05	165.895	220.7	225.46	182.425	322	197.3	273.675	183.635	241.905	225.405	211.215	226.915	1	1.6323	1.48217	1.10432	1.01415	0.972404	0.929906
PDPn(Podoplanin)	194.22	156.275	270.62	207.847	184.415	152.93	171.4	202.32	187.12	193.425	267.35	182	207.415	188.99	150.94	168.553	252.225	223.7	245.655	190.085	181.765	185.27	266.53	216.64	329.41	303.52	338.465	409.22	341.415	466.41	565.185	284.17	405.955	368.695	543.72	400.92	402.885	384.725	542.185	351.045	357.935	243.66	1	0.804629	1.39337	1.07016	0.949516	0.787406	0.882504
Akt	244.74	219.92	349.655	199.173	252.105	203.91	277.28	291.94	399.33	381.655	332.965	271.345	460.155	301.16	285.81	395.32	440.51	489.755	363.95	302.435	220.54	335.79	407.77	324.55	342.56	349.89	262.535	354.77	250.13	284.005	181.605	218.27	188.945	175.29	239.24	228.08	229.12	193.45	245.8	181.83	171.755	176.72	1	0.898586	1.42868	0.813816	1.03009	0.83317	1.13296
Hist1h1b	121.15	430.42	63.18	114.42	142.425	210.28	291.827	693.755	508.06	539.12	999.9	727.715	609.72	583.78	811.985	616.847	595.755	515.905	590.385	608.475	288.71	289.48	139.54	173.81	251.875	270.465	94.155	181.88	223.14	80.145	62.855	68.66	35.03	49.19	27.19	46.56	59.825	29.69	55.905	62.595	82.625	53.165	1	3.55279	0.521502	0.944449	1.17561	1.7357	2.4088
LOX	843.51	904.75	814.985	617.13	401.895	477.92	458.03	367.14	349.52	364.225	270.67	203.83	273.51	194.59	229.765	216.207	237.095	227.735	268.835	370.325	261.12	243.16	255.57	227.845	274.11	313.45	213.63	322.22	408.3	337.66	436.28	230.635	282.195	297.035	250.72	265.97	246.305	198.805	212.96	136.22	157.25	131.91	1	1.0726	0.966183	0.731621	0.476456	0.566585	0.543005
P-63	640.915	480.095	611.19	701.933	559.46	548.01	534.073	676.81	480	473.985	479.715	440.05	329.475	431.13	323.065	333.593	399.765	282.36	390.275	406.345	252.67	393.69	200.695	240.92	343.655	331.39	199.875	321.09	399.765	317.465	257.39	283.82	356.79	289.46	419.27	295.96	318.28	242.07	314.9	310.78	346.455	319.48	1	0.749077	0.953621	1.09521	0.872908	0.855043	0.833298
Chi3l1	118.475	302.39	139.68	213.18	279.255	229.4	198.8	274.695	486.66	466.935	167.935	105.46	215.525	503.8	129.045	251.153	308.655	241.185	237.62	128.045	157.17	92.63	102.99	149.1	1167.95	225.755	253.285	387.89	226.375	450.595	175.97	483.935	732.81	389.205	1500.07	722.13	910.585	625.28	938.055	1363.38	858.63	970.63	1	2.55235	1.17898	1.79937	2.35708	1.93627	1.67799
Cdh11	435.13	213.04	434.24	511.633	499.26	414.19	402.07	775.89	641.52	632.295	862.105	665.075	477.375	769.11	618.495	594.88	739.2	448.935	606.79	727.045	392.92	544.22	272.43	346.135	437.26	365.005	246.25	264.96	457.175	254.955	240.285	262.72	293.355	208.18	276.09	209.93	196.39	191.685	211.685	213.37	195.835	161.97	1	0.489601	0.997955	1.17582	1.14738	0.951876	0.924023
ywhaz	330.695	422.785	439.9	426.787	422.385	407.82	396.33	416.875	517.71	516.715	512.94	381.185	418.5	422.11	390.675	434.403	531.95	578.39	465.63	348.785	356.1	428.43	409.99	418.665	519.015	434.305	377.98	482.76	503.815	520.09	381.98	458.485	488.14	384.125	490.56	429.33	386.43	372.615	500.27	405.12	444.095	515.425	1	1.27847	1.33023	1.29057	1.27726	1.23322	1.19848
Tnc	245.59	143.655	384.475	295.843	413.625	395.08	411.097	624.43	701.15	717.34	898.21	676.375	844.09	625.73	488.48	770.807	1070.3	1321.51	1098.69	947.48	697.25	544.22	622.26	547.255	820.3	609.435	334.235	265.52	370.64	176.12	115.835	74.245	63.84	55.235	90.02	64.72	48.1	49.24	53.65	44.515	77.125	65.8	1	0.584938	1.56552	1.20462	1.68421	1.6087	1.67391
NDST1	573.435	347.185	616.945	455.473	564.795	388.71	406	392.295	434.23	425.66	453.98	337.185	396.94	404.8	402.325	394.617	453.405	510.47	492.825	564.545	294.045	347.37	419.955	440.82	398.425	545.155	476.025	534.41	583.9	583.115	582.225	382.245	498.805	474.21	587.82	453.01	567.37	489.015	546.68	422.32	385.155	357.855	1	0.605448	1.07588	0.794289	0.984933	0.677862	0.708014
Vegf	235.89	165.455	338.35	250.233	287.005	159.31	153.24	175.675	420.37	381.125	421.985	207.57	261.525	353.59	236.12	463.927	592.505	445.755	742.845	381.86	376.265	486.32	436.575	375.96	449.43	589.725	477.87	645.55	339.415	528.24	476.535	601.9	756.49	617.845	920.1	726.08	788.55	721.965	750.51	827.37	900.88	688.08	1	0.701407	1.43435	1.06081	1.21669	0.675357	0.649625
FOXF1	288.685	151.345	215.74	224.913	349.78	248.52	321.247	320.82	334.97	316.335	645.565	348.045	854.545	406.02	458.47	517.453	740.49	899.985	844.745	499.41	328.775	393.69	615.975	406.39	575	469.195	630.41	570.89	387.19	769.99	934.635	576.765	676.665	485.495	798.67	530.35	660.795	586.31	650.435	465.775	703.105	648.975	1	0.524257	0.74732	0.779096	1.21163	0.860869	1.11279
Claudin5	474.26	384.22	459.78	334.47	706.44	516.15	451.98	549.93	500.17	521.45	821.36	460.965	1139.48	582.08	653.01	710.81	1141.2	1618.54	1114.13	634.15	462.275	706.32	1214.24	751.55	834.84	773.395	925.265	967.21	611.35	1430.82	1048.88	894.62	692.93	503.67	1083.82	819.21	709.23	640.54	959.19	602.25	681.66	643.88	1	0.810146	0.969468	0.705246	1.48956	1.08833	0.953022
Col1a1	465.95	458.5	629.665	576.237	733.265	936.72	875.383	1076.92	1555.57	1610.28	942.08	779.345	1573.5	702.54	814.185	941.02	1125.27	1068.64	1087.02	1341.89	1167.2	1030.54	801.89	969.285	891.655	1015.14	477.085	843.71	840.02	531.33	410.625	349.3	356.41	280.865	402.96	303.85	447.245	277.165	354.54	268.09	304.735	262.19	1	0.984011	1.35136	1.23669	1.5737	2.01034	1.87871
SFTP-D	1065.87	373.44	1479.38	1205.15	852.245	681.83	785.23	603.18	655.2	655.645	391.885	282.485	560.45	445.03	419.715	609.12	630.69	842.105	614.905	523.71	594.98	567.38	575.365	480.95	979.77	605.715	548.34	785.89	517.615	945.945	963.865	895.24	1003.74	891.515	1816.64	1234.33	1044.27	874.35	1183.09	1170.05	1240.6	1134.86	1	0.350362	1.38796	1.13067	0.799577	0.639693	0.736703
ppia	930.41	1100.38	1084.82	1197.76	1061.3	962.21	1083.23	1333.28	1151.86	1183.04	1240.67	988.045	1048.02	1062.96	888.42	955.097	1187.3	1068.03	996.595	932.455	774.675	856.85	761.8	706.995	912.745	696.535	532.845	657.9	940.395	778.26	639.71	719.08	775.61	603.42	809.54	730.02	774.085	611.055	788.135	786.915	959.385	906.71	1	1.18268	1.16595	1.28735	1.14068	1.03418	1.16425
INMT	561.875	259.75	654.74	226.787	63.14	19.12	29.2033	33.705	12.45	11.47	29.265	25.78	23.835	26.58	17.83	21.15	24.225	34.03	33.54	83.235	50.87	185.27	229.735	306.85	102.92	316.32	570.9	840.34	986.695	1229.38	1802.56	3099.04	3386.58	2785.38	2586.91	2650.98	2407.84	2865.61	2016.76	2687.39	2487.85	2459.22	1	0.462291	1.16528	0.403625	0.112374	0.0340289	0.0519748
VIM	789.465	777.54	923.835	797.82	766.605	356.84	532.587	695.95	1002.62	892.065	1331.58	753.09	924.145	1279.25	1311.67	1259.72	1123.68	1333.17	1435.66	1130.26	922.585	1053.7	1204.04	1039.15	1276.03	1330.15	613.285	1424.15	1107.95	766.11	792.005	1254.76	1238.93	883.76	1274.73	962.84	1043.97	744.91	979.9	1047.63	1232.66	1218.05	1	0.984895	1.1702	1.01058	0.971044	0.452002	0.674617
b2m	557.57	452.56	435.565	639.477	646.665	471.54	583.763	669.68	910.55	900.705	746.415	883.41	955.51	1276.57	1486.27	879.19	751.09	1053.06	837.885	697.245	812.525	845.27	709.855	863.26	1024.17	806.34	976.35	1190.62	955.52	1324.01	1522.09	1585.97	1814.72	1869.25	1295.87	1790.73	1674.92	1862.63	2098.12	2380.69	2498.07	2432.84	1	0.811665	0.781184	1.1469	1.15979	0.845705	1.04698
gapdh	1349.03	4692.86	1731.2	1359.76	1079.66	1178.86	1116.77	1214.13	1444.04	1430.89	1214.97	960.615	1165.55	1034.18	962.74	977.917	1324.54	1009.12	1206.57	1068.05	982.455	880.01	726.1	825.14	1165.16	752.63	727.71	1114.28	911.82	857.03	705.42	884.36	904.74	722.055	1191.36	882.34	877.125	771.585	1099.01	881.88	998	864.685	1	3.47869	1.2833	1.00795	0.800327	0.873858	0.827832
POS_D	1239	1705	1316.5	1143.67	1060.5	1246	905.333	884	1636	1373	1408	1210	1259	1839	1227.5	1372	1368	1395	1065	968.5	1137	870	841	1541	1775.5	1559	1357	1720	1385.5	1178	1215	1519.5	1483.5	1250	1510	1846	1570.5	1574.5	1940	2008	1554.5	1235.5	1	1.37611	1.06255	0.923056	0.855932	1.00565	0.730697
Eln	1407.18	1027.91	2227.05	992.61	808.41	917.6	860.613	735.44	1752.17	1600.36	1024.85	642.915	1800.17	1342.41	1016.13	2443.66	3099.02	3049.16	4632.6	3308.55	4224.69	4029.53	3563.53	3864.12	4969.6	6381.64	3714.61	6262.43	4849.61	3053.68	4604.39	1777.44	1587.97	1563.47	1509.74	1555.55	1361.49	1040.73	1484.67	693.035	548.815	457.245	1	0.730476	1.58263	0.705387	0.574487	0.652082	0.611585
AGER	1964.72	1673.32	3043.85	2358.21	2922.6	1994.51	1902.43	1679.41	2300.57	2278.03	2690.98	1921.71	2620.52	1846.21	1776.75	2307.35	2578.51	3988.72	3004.45	3826.15	2495.97	2211.61	3123.32	3007.47	3059.53	3091.28	3456.12	2920.15	3407.69	4971.43	4494.93	2816.49	3866.53	3955.88	3816.93	3879	3944.51	3828.16	4373.23	3433.3	3196.32	2926.82	1	0.851683	1.54926	1.20028	1.48754	1.01517	0.9683
POS_C	5691.5	7245.5	5644.5	4933	5259	6108	4416	4404	6335	5574.5	6392.5	5727.5	5611.5	7608	5559.5	6114.33	5713.5	6152	4261.5	4411	4902.5	4158	4340.5	6108	6876.5	6301	5403	6053	5900.5	5630.5	5804	6939.5	6136	6004.5	6340	8043	7275	7273	7479.5	8143	6210.5	4866	1	1.27304	0.991742	0.866731	0.924009	1.07318	0.775894
actb	9005.47	6466.26	10071.8	8706.48	11082.9	8946.6	10353.2	9873.84	9899.55	10350.8	10381.5	10128.5	18602	8457.08	10582.8	11803.7	11757.3	15752.4	13802.2	12469	11258.8	11498	14812.6	13263.7	11820.4	10564.2	11220.7	10451.2	10483.8	11456.9	13340.7	8766.17	8669.22	8540.49	9840.77	9837.58	9921.58	10438	10211.7	8374.61	9038.35	9187.61	1	0.718037	1.1184	0.966799	1.23068	0.993463	1.14965
SFTP-C	11842.7	9926.35	12911.1	14257.3	11658.1	8150.07	10429.9	11085.5	12050.2	11301.8	13569.5	8292.91	13929.8	13513.4	12416.3	14943.4	15462	17053.3	17174.1	12869.2	17476.5	17542.3	18579.2	15551.6	18172	14833.9	16902.5	17115	14345.6	22324.4	21853.1	21963.8	23954.1	18782.5	30392.9	23573.1	20628.6	20771.5	23465.4	23979.2	25406.7	24826.2	1	0.838187	1.09022	1.2039	0.984417	0.688196	0.88071
[truncated: 77 more columns]

## Sheet: Sheet2
		P0.5	P1	P1.5	P2	P2.5	P3-a	P3	P3.5	P4-a	P4	P4.5	P5	P5.5	P6	P6.5	P7	P8	P8.5	P9	P9.5	P10	P10.5	P11	P11.5	P12	P12.5	P13	P13.5	P14	P15	P16	P17	P18	P19	P20	P21	P22	P23	P24	P25	P26	P27
E2F8		0	-0.220016	-1.48971	-1.04101	-0.961977	0.333582	0.259224	0.386939	0.436285	0.216878	-1.14552	-0.260468	0.0282613	-0.374237	-0.794215	0.0490999	0.185851	-1.0129	-0.221679	-0.015783	0.146427	2.19585	2.44023	-0.436603	-0.195298	-0.507862	0.979159	-0.584963	-0.38911	-0.195298	0.502248	-0.348572	-1.86783	-0.870432	-1.48172	-0.355858	-1.43467	-0.263891	-1.14236	-1.02737	-0.448238	-0.811642
MMP7		0	0.958571	-0.882406	-0.748727	-1.73602	-0.253757	0.331458	-1.18304	-1.43448	-1.72342	-0.945025	0.396878	-1.13428	-2.63817	-1.00095	-0.319398	0.445114	-1.21356	-1.56609	-0.139499	-0.440912	0.608513	0.820187	-1.79742	-1.40903	-0.371689	-0.168027	-1.1723	-1.46562	-0.130114	-0.0850904	-0.638169	-2.13845	-1.45777	-1.06906	-1.68016	-1.03169	-0.439623	-2.01816	-1.29511	-1.99526	-0.991477
MUC5Ac		0	1.26541	0.975109	1.66297	-0.2367	0.745294	0.670936	-0.0941222	2.26303	2.09726	-0.733805	0.85326	0.795373	0.127112	0.379971	0.720931	0.334026	0.61378	-0.0210337	1.09192	0.558139	2.60756	2.14953	-0.135227	-0.203533	1.29742	1.13837	0.240716	1.21641	-0.00380157	0.91396	0.782188	-0.908078	0.785495	0.931982	0.90182	-0.0326372	0.0169842	-0.575502	-0.841935	-0.321928	-0.243426
KRT5		0	1.53405	-1.14684	-0.836456	-0.866733	-0.253757	-0.328115	-0.889426	-0.437049	-0.761551	-0.945025	-0.14579	-1.00476	-2.37908	-0.619079	-0.319398	-0.907128	-0.0394756	-1.02008	-0.603122	2.43672	0.608513	0.201758	-1.13428	-1.84781	-0.112552	-0.168027	-1.1723	-0.787546	-1.00285	0.76033	-0.510914	-1.03169	-1.45777	-0.844392	-1.68016	0.0503968	-1.62933	-0.115636	-1.26513	-1.32098	-1.39898
MCPt4		0	-0.583298	-0.852192	-1.03875	-2.10001	-0.250429	-0.323992	-1.70915	-1.626	-1.65869	-1.54599	-0.142462	-0.55505	-2.49949	-1.99762	-1.19344	-1.23019	-1.18512	-1.05679	-1.59979	-0.42092	-0.388159	-0.794914	-2.02061	-3.07774	-0.0832744	-1.1647	-3.75822	-1.45967	-1.58544	-0.598352	-1.17112	-3.20363	-0.881706	-2.64671	-1.93987	-1.70604	-0.971254	-3.28945	-3.62306	-2.61429	-2.78094
ubc		0	-0.505891	-0.958688	-0.991558	-1.81659	-0.834598	-0.653892	-0.535037	-0.659899	-1.30426	-0.686223	-1.42865	-0.784518	-0.684181	-1.58179	-0.0521539	-1.36184	-1.19265	-1.38986	-1.18396	-0.425233	0.0276724	-0.379083	-0.919727	-1.0999	-1.26863	-0.441525	-1.53136	-1.36839	-0.169608	0.0139026	0.0314051	-1.2671	-0.826692	-0.425233	-0.678072	-1.04122	0.33759	-0.620317	-0.344003	-0.769286	-0.601889
NEG_B		0	-0.485427	-1.22239	-1.39232	-0.392317	-1.39232	-1.16993	-0.807355	-0.222392	-0.584963	-0.807355	-0.304855	-0.584963	-0.222392	-0.485427	-0.517848	0.131245	-0.14439	-1.80735	-0.932886	-0.932886	-1.07039	-1.22239	-0.0703893	-0.691878	-0.485427	-0.584963	-0.584963	-0.584963	-1.39232	-0.14439	0	-0.222392	0.131245	-0.807355	0.607683	-0.392317	-0.584963	-0.222392	0.308122	-0.14439	0.131245
KLra4		0	0.62977	-0.481791	-0.659682	-0.0287284	2.00738	0.970498	-0.922477	-1.85713	-2.03688	0.526132	1.11478	-1.39246	-2.3776	0.764464	0.746943	-1.34544	-0.635914	-0.759517	-0.342555	1.16181	2.86908	0.462325	-0.873711	-2.03688	1.49377	0.0925404	-1.91602	0.278501	-1.00684	1.85122	0.0861237	-1.02757	0.903549	-1.38948	-0.199815	-0.970717	0.952581	-1.0439	-1.42264	-0.775009	-1.13841
NEG_A		0	0.938599	-0.125531	0.152003	0.115477	0.874469	0.415037	0.415037	0.584963	0.222392	0.584963	0	-0.263034	0.584963	0.222392	0.874469	0.222392	0.415037	0.222392	0	0	-0.263034	0	0.321928	1.05889	0.222392	0.662965	0.736966	0.222392	0.874469	0	0.415037	0.662965	0.736966	0.415037	1	0.5025	0.321928	1.11548	0.736966	1	0
SNAI1		0	1.04357	-0.926285	-0.71322	0.258031	0.333582	0.259224	1.00641	0.764947	0.368267	0.0380234	-0.260468	0.935059	0.483999	-0.413611	0.457917	0.93207	0.40645	0.12565	-0.015783	0.742947	1.19585	1.73782	0.313053	1.77499	1.35995	1.23639	2.50174	-0.200208	1.16881	1.50225	1.75695	-0.0746767	0.149003	1.4593	1.56918	0.870962	-0.394727	1.5687	0.875636	-0.409815	-0.417418
AMACR		0	0.0895516	-2.15016	-1.10191	-2.38735	0.743489	0.413853	-0.331435	-2.73934	-2.98726	-0.552636	-1.39605	-1.22129	-2.26389	-0.535366	-0.388591	-0.666088	-0.640012	-0.913123	-0.4423	0.162906	1.19016	-0.250862	-1.89451	-2.88923	-2.09852	-0.171881	-1.95384	-1.33263	-1.42375	-0.605	0.432345	-2.22571	-1.23349	-2.33382	-3.26845	-1.58212	-0.39543	-1.50614	-2.35791	-2.5666	-2.29378
NEG_E		0	0.36257	0.192645	0.308122	0.440573	0.652077	-0.304855	-0.222392	0.36257	0.440573	0.584963	0.0995357	0.836501	0.36257	-0.222392	0.192645	0.836501	0.777608	-0.222392	-0.485427	-0.485427	-0.485427	0.280108	0.36257	0.893085	0.777608	0.192645	1	0.652077	0.0995357	0	0.0995357	1.19265	0.36257	0.192645	0.893085	0.777608	0.893085	1	0.836501	0.514573	0.716207
C/EBP		0	1.06604	-0.282554	-0.150525	-0.0552156	-0.989772	-1.06413	-0.860942	-0.195091	-0.187928	-0.644034	-0.339137	-1.29509	-0.205574	-0.304922	-0.856461	0.72091	0.366619	-0.197051	-1.33914	-0.160263	-0.127502	-0.534258	-1.75996	-0.467294	-0.848567	0.0954241	-0.908317	0.000570123	-0.517835	-0.337695	-0.40481	0.103408	-0.966185	-0.38755	-0.0954683	-0.241527	-1.17564	-0.10341	-0.314818	-0.0340424	-0.483945
Ctnna2		0	-0.0475976	-1.67853	-0.441933	-0.494592	-0.572833	-1.02019	-2.08708	-1.58649	-1.93961	-0.137694	0.186828	-0.923641	-3.28065	-1.49781	-1.41225	-1.14231	-0.71493	-1.3382	-1.2262	-0.759988	0.289437	0.704708	-1.22353	-2.5638	-1.69077	0.423766	-1.75613	-0.107032	-0.515117	0.0796044	-1.31055	-1.8327	-0.276496	-1.27143	-1.77946	-1.19015	-0.201482	-1.40316	-2.15836	-1.68708	-2.57737
Kcnma1		0	-2.08538	-0.986811	-1.0811	-1.3842	-1.5808	-1.184	-0.0524254	-0.0910162	-0.224413	0.00302531	-0.218675	0.690886	-0.703661	-1.50578	-0.583827	0.175173	-0.53401	-0.593886	-0.41365	-1.76796	0.866428	0.134713	-3.12446	-2.04109	-1.4396	0.740671	-2.49935	-0.722277	-1.59446	-0.0325419	-1.46864	-2.35874	-2.05518	-2.97709	-2.27025	0.220715	-1.30163	-2.34521	-1.9403	-3.5561	-3.03797
ALDH1A2		0	0.141082	0.242808	-0.77875	-0.0247704	-1.98749	-1.59069	-1.52785	-0.570471	-0.601332	-0.660587	-0.63464	-1.18565	-1.83707	-1.11652	-1.07502	-0.509849	-1.61701	-2.35866	-1.17271	0.0209788	-0.125219	-0.913545	-3.53115	-1.51148	-2.42152	-1.59442	-2.3225	-1.71018	-2	-0.973403	-0.828933	-1.47371	-3.1915	-1.38527	-2.19411	-1.9528	-1.37042	-3.30829	-1.54358	-2.49851	-3.15035
NEG_F		0	0.106915	-0.308122	-0.0759489	-0.530515	-0.70044	-0.530515	-0.176878	0.206451	-0.176878	-0.241008	0.547488	0.29956	-0.241008	-0.530515	0.0721498	-0.308122	0.0544478	-0.893085	-0.176878	-0.793549	-0.378512	-0.893085	0.106915	0	0.157541	0.343954	-0.241008	-0.176878	-0.115477	-0.115477	0.253757	-0.241008	0.206451	0.106915	0.469485	0.509014	0.547488	-0.176878	0	0.157541	-0.241008
FOXD1		0	0.122521	-1.19418	0.27208	-0.823268	0.746682	0.705608	0.523534	-1.56173	-1.85269	0.907523	0.927631	-0.788956	-1.54685	-1.58623	0.669713	0.295479	-0.990536	0.541043	0.941541	-0.00952697	1.6082	0.666393	-0.540396	-1.52301	-0.937439	0.0219879	-0.25634	0.438272	-0.367099	1.09848	-0.365467	-0.7395	0.168306	-0.330818	-1.26544	-0.449417	0.760574	-0.472068	-0.827756	-1.31656	-0.592897
MMP-3		0	0.732971	-0.997154	-1.12182	-1.27123	-0.838719	-1.05891	-0.574081	-1.97645	-2.24999	-1.16376	-1.9777	-2.33849	-3.08778	-2.20404	-0.641128	-0.876581	-0.697514	-3.15105	-1.49209	-0.418736	0.0235509	-0.081401	-2.26817	-1.79412	-1.47791	-0.287362	-0.642116	-0.910695	-1.26741	0.765181	-1.03623	-1.18304	-1.29046	-1.3305	-1.15105	-1.62151	-0.859822	-0.29007	-1.17874	-0.591149	-1.02137
PTGS2		0	-1.85252	-0.666218	-1.69755	-1.45425	0.0102247	-1.00923	-0.901088	-1.94081	-1.79126	-3.16378	-0.82681	-2.0622	-2.84923	-2.50836	-0.771918	-1.26153	-1.45863	-2.79917	-1.66224	-1.1979	0.135076	-0.596639	-2.33269	-1.65289	-1.92167	-1.09788	-1.42396	-2.03485	-0.518781	-1.66008	-1.69805	-1.08863	-0.931208	-0.125469	-0.466804	-1.50642	-0.518455	-1.09495	-1.3611	-0.0973874	-0.352637
Nol3		0	2.09629	-0.874742	0.240043	-1.31907	1.53108	1.45695	-1.16993	-0.845056	-1.05671	0.145363	0.0162651	0.492071	-1.08767	0.125258	1.55559	-0.655352	0.594744	0.448386	1.26521	-0.656641	1.39278	0.53673	1.3514	-0.429284	0.80969	0.433323	-0.272882	-0.296795	0.839704	0.182591	0.714713	-0.0507721	1.05614	0.132737	0.766112	0.206887	0.514001	0.863723	0.444184	0.69464	0.300838
Thy1		0	2.43898	0.501061	0.136268	-0.323967	1.11133	0.685524	0.198441	0.60921	0.86555	-0.459737	-0.61336	0.638303	-0.136689	0.172639	0.0194305	-0.40475	-0.0960467	0.239063	-0.360127	-0.661539	1.97285	0.98113	0.67348	0.0946369	0.901337	0.739897	0.664766	1.12036	1.09731	0.539702	1.05948	0.566918	0.0629959	0.448871	1.03622	1.55504	0.142681	0.946868	0.906999	1.3167	1.26303
HPGDS		0	-0.362393	-1.37747	-0.0462415	-0.253928	0.132712	-0.207521	-1.15831	-1.41868	-1.31438	-0.807417	-0.925503	-1.48453	-1.89749	-1.05001	-0.554263	-1.22753	-1.33177	-2.20218	-0.72551	-1.06136	0.994529	-0.734155	-1.32865	-2.31994	-2.3076	-0.79746	-1.99307	-1.72346	-1.6176	-0.641407	-0.818318	-1.55426	-2.37425	-1.78031	-1.39499	-1.96566	-0.851078	-2.02	-2.06188	-2.44818	-1.98126
Acta2		0	1.53869	-0.197617	0.391524	0.320881	0.750138	0.577805	0.818666	-0.262939	-0.491437	0.655102	-0.0439777	0.848843	-0.100012	-0.481434	0.689254	-0.0727235	0.189309	0.0587604	0.448442	-0.109224	1.1968	-0.244214	0.0737626	-0.502857	-1.36836	0.917734	-1.29645	-0.609202	-0.586153	0.683239	-0.63632	-1.42092	-0.318838	-0.327173	-1.93987	-0.944442	-1.34399	-1.56136	-1.48876	-1.31765	-1.41583
kcne1L		0	0.886239	-1.37851	-0.144156	-1.33227	0.748839	0.323069	-0.749172	-1.77227	-1.7212	-0.268626	-0.527312	-0.46209	-1.54432	-0.534183	0.0952877	-0.267862	-0.0169037	-0.602347	-1.37193	0.2848	1.02577	0.204251	-1.27744	-1.8732	-0.955049	0.230433	-2.17151	-0.0136991	-1.08422	0.256944	-1.04771	-2.27513	-1.04968	-0.986744	-2.84787	-0.978598	0.108975	-1.48277	-2.44429	-1.24326	-1.54802
ITGax (CD11c)		0	-0.676139	-1.69737	-0.726648	-1.01947	0.635356	0.0591398	-0.0163568	-0.903926	-1.06473	-0.690256	-1.25724	-0.875422	-0.863376	-0.494245	-0.0854129	-0.434807	-0.131538	-0.227603	0.92674	0.879496	0.49706	0.432406	-0.494245	-0.0907084	-0.483757	1.46669	0.0373169	0.105093	-0.308039	1.34114	0.0325973	-0.0329011	-0.144598	-0.676139	0.322455	0.468117	0.468117	0.000878888	0.52696	0.487059	0.000878888
Wif1		0	1.05085	0.0250488	0.417887	0.676033	1.52618	1.11108	1.2511	1.04336	1.03701	1.73574	0.445882	0.603857	0.795429	1.21047	1.82793	1.50624	1.85703	1.87824	1.35098	1.16938	2.97264	1.92964	1.46402	1.16466	1.09005	0.888626	0.828852	1.03741	1.09654	1.46313	0.568018	-0.225384	0.0629959	-1.28969	0.320297	-0.34659	-0.567947	-0.107417	-0.977356	-0.519238	-0.906891
Sox9		0	0.0449522	-0.190534	-0.383362	-1.00754	0.682023	0.0812894	-0.452089	-0.882708	-0.910235	-0.542149	-0.440776	-0.548965	-1.47534	-0.873173	-0.812987	-0.360311	-1.35102	-0.970978	-0.565763	0.271613	0.736291	-0.670465	-1.29966	-1.353	-1.09961	-1.26496	-1.63056	-1.3326	-2.65486	1.11622	-1.53424	-1.69461	-0.538754	-1.52376	-2.81542	-0.620551	-1.26433	-2.07481	-2.59407	-1.85054	-3.58004
RAGE		0	0.0266073	-0.068448	-0.222435	-0.659715	0.236121	0.147425	-0.96296	-0.884215	-0.891616	-0.730315	-1.41383	-0.194197	-2.1918	-1.21372	-0.72003	-0.721809	-0.928115	-1.63318	-1.06565	-0.965933	0.290389	-2.11637	-2.39518	-2.3733	-2.43068	-0.689813	-2.6179	-0.610615	-1.20799	-0.478435	-1.54162	-2.43376	-1.45344	-1.57755	-1.99981	-1.76614	-2.43788	-1.91405	-1.90975	-1.66122	-2.51743
ITgam (CD11b)		0	-0.465483	-0.791163	-0.381065	-0.910559	-2.06098	-0.288221	-0.254916	-0.658449	-0.662739	-1.38531	0.202955	-0.177067	-0.0677864	-0.55475	-0.0385035	-1.20933	-0.762796	-0.534561	-0.362105	0.220297	1.12322	0.394745	-0.949861	-0.883771	-0.685254	-0.415399	-1.86437	0.0220839	-1.22638	-0.131464	-0.88127	-0.644382	-0.0826537	-0.371905	-0.488905	-1.04241	0.000271362	-0.272182	-0.250389	-0.482824	0.463669
MGAT4A		0	0.185862	-0.808201	-0.275353	-1.08269	-0.835112	-0.55255	-0.908239	-1.77019	-1.68886	-1.03858	-0.10685	-1.41349	-1.34689	-0.986948	-0.313038	-1.64852	-1.04336	-1.79127	-0.721959	-0.292776	1.24862	-1.01659	-1.67799	-1.76731	-0.689196	-1.77525	-1.60284	-0.428494	-1.3642	-0.671573	-0.74836	-1.19925	0.0786034	-0.690219	-1.1121	-0.246382	-0.434769	-0.849139	-1.57485	-0.829464	-1.75014
F13A1		0	-0.117112	-0.867257	-0.205147	-0.594868	0.43403	-0.108942	-1.85967	-1.52238	-1.45222	-1.36547	-0.744074	-1.77634	-2.48454	-1.98012	-0.932456	-1.57692	-2.06542	-2.6156	-1.32694	-1.40065	-0.163543	-1.62157	-2.28297	-1.85212	-2.86726	-1.6336	-1.72258	-2.16354	-1.77538	-1.18141	-1.44198	-2.33323	-1.17826	-1.42434	-1.79022	-1.08299	-1.12664	-1.32834	-1.61901	-2.11395	-0.566176
ERB		0	1.34289	-0.448163	0.466493	-0.0396756	1.98587	0.990183	0.0242543	-0.929591	-1.27244	0.516936	-0.613576	0.314162	-0.823342	-0.399495	0.972425	0.194936	-0.252393	-0.844414	-0.824063	0.934748	0.388293	-0.0697372	-1.41409	-0.588227	0.170514	1.24033	-0.585778	-0.548931	0.277972	1.62305	1.00772	0.335318	0.182777	0.215094	0.0366278	0.529982	0.939857	-0.0943329	-0.0147508	0.235667	0.11814
NME7		0	0.191755	0.580303	0.730056	0.156156	0.331184	0.574002	-0.288842	0.357212	0.375111	0.146152	0.215499	-0.464389	-0.413045	-0.443322	-0.361879	0.341786	0.0039822	-0.23824	1.10463	0.00256125	0.871073	-1.53568	-0.550207	-0.174811	-0.334444	-1.59812	-0.407745	-0.0634702	-0.683837	0.0226088	-0.159778	-0.249709	-0.681551	-0.344897	-0.611989	-0.317662	-0.97487	-0.560672	-0.389721	-0.198803	-0.344174
Claudin 1		0	-0.131252	0.0394228	-0.17791	-0.974681	-0.105968	-0.281239	-1.02883	-1.38285	-1.39583	-1.36184	-1.01662	-1.19123	-1.66688	-2.14498	-0.649175	-1.14531	-2.14963	-1.18438	-1.9322	-0.779197	0.270228	-1.45846	-1.20988	-1.39504	-0.702375	-0.683431	-0.803379	-0.198625	-1.16236	-1.89988	-0.977637	-1.07019	-0.886211	-0.920211	-1.40337	-0.914819	-1.29027	-1.27783	-1.48051	-1.07905	-1.41935
RARA RARBRARG Retinoic acid receptors alpha beta gamma		0	1.9491	2.2425	0.822194	1.39981	1.59937	0.862153	1.65197	2.23183	2.22745	1.98101	0.664288	2.15049	1.87655	1.42515	2.14024	2.33897	2.21174	1.99886	1.12739	2.41125	0.875923	1.46917	1.60012	2.94495	1.8948	2.69215	2.79489	1.39068	2.53613	2.81355	1.56037	2.00883	1.23427	2.88214	2.52426	2.55025	1.55064	3.09297	2.41253	1.96529	2.32307
Serpina3		0	0.200291	-0.598988	-1.18748	-1.43049	-0.0984485	-0.742333	-0.785788	-1.45405	-1.31602	-0.618985	-0.293036	-0.585914	-1.51318	-1.30867	-0.0895703	-1.43906	-0.317336	-0.927819	-0.185954	0.189761	1.0262	0.0092751	-0.0648803	-1.35066	-0.612504	0.440038	-0.340445	-0.560429	-0.232899	0.710846	0.295378	-0.473003	-0.107989	-0.392793	0.210196	-0.559494	-0.0876215	-0.49847	-0.44769	-0.857162	-0.799341
ABCG2		0	0.745633	0.552281	0.589752	-0.204253	-0.399772	-0.47409	0.473325	0.897806	0.874911	0.274428	-0.124777	-0.43336	1.05554	-1.07122	-0.444732	0.444195	0.17002	-0.0927091	-0.204912	-0.370271	0.461743	-0.58125	-0.514777	0.892733	-0.526263	-0.48806	0.0645903	-0.193749	0.137634	0.766123	-0.105882	0.561224	-0.852522	0.825743	0.493371	0.459666	-0.419907	0.642242	0.426431	0.445036	0.390887
PCYOX1		0	-0.549643	-0.276292	-0.885428	-0.283219	0.503654	-0.0340436	-0.0899505	-0.440343	-0.344167	-0.446406	-0.055628	-1.06008	-0.59283	-0.482576	-0.587283	-0.626573	-0.201999	-0.173362	0.0319221	-1.52557	-0.219542	-0.695366	-0.162344	-0.729554	-0.306187	-0.59984	-0.885868	0.10703	-1.0475	0.17968	-0.697967	-0.611237	-0.544952	-0.895124	-0.0357487	-0.343714	-0.807622	-0.868182	-0.509995	-0.260398	-0.796739
MUC5Ab		0	0.501386	-1.09019	0.880706	-1.55849	3.36638	3.153	-1.45315	2.94743	2.87026	-0.725596	-2.72003	-0.222263	-2.74416	-2.05096	-1.27958	-1.2712	-0.976583	-2.13849	-1.66141	-0.304778	-0.263709	-1.67046	-3.30158	-2.39673	-2.56001	-1.4804	-0.630557	-3.33784	-1.55315	-0.817247	-1.60429	-2.37504	-1.44819	-0.880796	-2.3326	-1.45244	-1.78739	-2.31572	-1.81542	-2.35765	-2.13393
EPHA7		0	0.99727	0.231984	0.0920416	0.283174	0.330159	0.251975	0.300998	0.316891	0.355781	0.477646	0.0757785	-0.131278	0.059937	0.33975	0.513925	0.726729	-0.118089	0.0883277	0.624273	0.159078	0.192052	0.481389	-0.537251	-0.446209	-0.523547	0.218796	-0.589476	0.11945	0.13746	0.175554	-0.101452	-0.237454	0.284538	-0.48353	-0.409828	-0.336411	0.491041	-0.578808	-0.469011	-0.402285	-0.715462
LRAT		0	-0.367348	-1.22593	-1.04647	-1.72854	-0.54363	-1.43607	0.28661	-2.22533	-2.35836	-0.341209	-0.865181	-0.872745	-2.19183	-1.21508	-0.520675	-1.48016	-0.900016	-1.93571	-0.271132	0.00542513	1.73277	-0.122851	-0.591578	-1.50639	-1.57722	-0.37203	-1.24115	-0.306546	0.0271779	1.20947	0.344221	-0.323935	0.836708	0.0868842	0.558318	0.197103	3.07937	1.17469	1.65337	0.546847	0.131987
IGF1		0	0.375419	-0.0797827	0.748534	0.386672	-0.0604097	-0.185889	1.07856	0.656953	0.566572	0.530953	-0.170332	0.595777	0.861085	1.0065	1.09123	0.479327	0.512237	0.666389	0.895775	1.35052	1.97108	-0.0202238	-0.2172	0.657814	0.633703	0.152817	-0.395272	-0.00707338	-0.442435	0.830736	-0.0329397	-1.10817	-0.840364	-0.601338	-1.4889	-0.5197	-0.57563	-0.769258	-1.1111	-0.734074	-1.26564
GUCY1A2 sGC(soluble guanylate cyclase) (PMID 23934926)		0	0.748085	-0.185246	-0.109833	-0.535939	-1.30759	-1.94796	-0.324389	-0.413285	-0.462552	-0.0184167	-0.416945	0.403958	0.297987	-0.732854	0.577956	-0.235259	0.398936	0.42677	-0.202515	-0.186287	1.72447	0.0260687	0.292021	0.540282	0.465719	-0.0016021	0.631109	0.700035	0.816184	0.785857	0.640531	0.389013	-0.185766	0.522876	-0.233107	0.215678	0.285654	0.42728	0.0516748	-0.0205033	-0.150047
Shisa3		0	1.20938	-0.144872	0.56006	0.368025	0.336892	0.842745	1.16135	0.986497	1.02481	1.51394	1.32347	1.43174	0.733473	0.545048	1.75476	1.25119	0.536004	0.500868	0.314071	0.406721	2.3361	0.519939	0.0150771	-0.277231	0.63213	-0.339913	-1.09729	0.364253	0.000857641	-0.554544	-0.356659	-0.63708	-0.115453	-0.991162	-0.998	-0.674473	0.115103	-0.955233	-0.801291	-0.728412	-0.814809
PRIM2		0	-0.636827	-0.574082	-0.358892	-1.05757	0.746593	0.418087	0.00433486	-0.355417	-0.314351	-0.477418	-0.131438	-0.608626	-0.568639	-0.379747	-0.392928	-0.287277	-0.796845	-0.691648	-0.069623	-0.786044	-0.614015	-0.49299	-0.563016	-0.823247	-1.2581	-0.0937427	-1.20772	-0.568841	-1.0749	-0.512791	-1.13055	-1.36552	-0.559013	-1.00027	-0.647626	-0.960127	-1.49567	-0.698237	-1.01555	-0.747951	-1.05109
TTF-1		0	1.31321	0.39124	0.754904	0.270945	-0.121776	-0.0861847	0.0860699	0.577575	0.59507	0.0463238	0.433643	-0.515651	0.2367	-0.481842	0.516583	0.488248	0.276324	0.507952	0.463941	0.281041	0.32489	0.801957	0.484907	0.385477	0.521967	0.944456	0.255995	0.631622	0.564796	0.183415	0.912895	0.762027	0.706688	0.836886	0.291279	0.603996	0.433836	0.756957	0.259693	0.362599	0.0553626
EPHA3		0	0.386631	0.306623	0.284344	0.274217	0.0143147	-0.300227	0.295488	-0.682404	-0.581727	-1.09276	-0.413165	-0.681639	-1.01177	-0.733286	-0.829387	-0.826174	-1.98738	-1.16719	-2.40406	-2.75837	0.098233	-2.565	-1.95859	-1.93617	-1.7574	-0.739318	-1.86608	-1.71081	-2.09846	-1.40583	-1.36968	-2.06698	-1.8991	-1.92491	-2.49619	-2.02916	-2.00563	-2.58315	-1.99762	-1.87374	-2.48495
THTPA		0	-0.132799	0.0314421	-0.43582	0.179867	-0.213913	-0.262923	0.199304	-0.106744	-0.226581	0.141705	-0.470172	-0.0867659	-0.328286	-0.850984	0.0753291	-0.170901	-0.229684	-0.413365	-0.722354	0.112858	-0.159645	-1.61768	-0.269966	-0.368218	0.0315785	-0.307605	-0.259581	-0.248939	-0.167766	-0.650783	0.134357	-0.770535	-0.223322	-0.612977	-0.449844	-0.328461	-0.375796	-0.596019	-0.553043	-0.788965	-0.932987
tbp		0	-0.166949	-0.460468	-0.248158	-0.750556	0.457154	0.340264	-0.177847	-0.676933	-0.734091	-0.0829803	0.013235	-1.21785	0.0390102	-0.172388	0.14442	-0.218857	-0.266873	-0.134554	-0.0572398	0.345664	-0.266042	0.912348	0.341446	-0.669498	0.278207	0.446296	-0.359539	0.428444	0.199192	0.716094	0.169714	0.209981	0.312678	-0.229142	0.204596	0.13381	0.339127	-0.183718	0.0543902	0.338991	-0.00987617
hprt		0	0.180097	-0.204551	-0.455227	-0.791523	-0.515388	-0.468024	-0.3228	-0.313321	-0.400329	0.540024	-0.655316	0.167177	-0.405565	0.278971	0.168352	-0.23816	0.427458	0.00015839	0.59454	0.375291	0.831678	0.351031	0.13205	-0.339739	-0.0729339	0.330519	-0.0200976	0.0559254	-0.150631	0.0539432	0.117523	-0.911531	-0.335535	-0.428831	-0.296104	-0.353232	0.377854	-0.516521	-0.464668	-0.511996	-0.6174
Claudin 3		0	-0.383919	-0.0269889	-0.53629	-0.606816	-0.603542	-0.63602	-1.15027	-0.699488	-0.777939	-1.31269	-1.26456	-0.781634	-1.42601	-0.779785	-0.724073	-1.19108	-0.651627	-0.603039	-1.3382	-1.65267	-0.9117	-0.55506	-1.5051	-1.47948	-0.713537	-1.79651	-0.605807	-0.845202	-1.04336	-1.17511	-1.03842	-1.13547	-1.15727	-0.24167	-1.17212	-1.31002	-1.1264	-1.2592	-1.16988	-1.06537	-1.32611
P4HA3		0	-1.21892	-0.369807	-0.435656	-0.215951	-0.940108	-0.0659131	0.415087	0.222083	0.324718	0.892147	0.518226	1.27032	0.167804	0.146467	1.11334	1.39025	1.74364	1.16351	1.38001	1.42105	1.65825	1.58581	0.567355	1.17549	1.24889	0.384082	0.179311	0.265752	-0.691863	-1.22305	-1.01204	-2.04737	-0.933333	-1.83675	-1.53834	-4.3057	-1.54234	-1.76416	-2.31154	-1.90507	-2.4369
Dnmt3a		0	-0.677073	-0.0863606	-0.769776	-0.4352	0.11247	-0.651431	-0.511793	-0.628022	-0.542953	-0.554589	-0.983069	-0.317677	-0.688532	-0.663279	-0.288114	-0.612035	-0.369829	0.0566933	-0.867297	-0.0697827	-0.0260341	-0.209954	-0.127878	-0.58961	-0.177184	-0.330828	-0.290856	-0.578451	-0.135924	-0.0408547	-0.285004	-0.794032	-1.08258	-0.681646	-0.931394	-1.04506	-1.13402	-0.893012	-1.4392	-1.66247	-1.69479
ABCD1		0	-0.572815	1.20941	-0.291646	-0.438841	-0.0213487	0.0170013	-0.663314	-0.0650178	-0.0509398	-0.0787928	-0.690956	0.0173228	-0.599817	-0.331089	0.216165	-0.225277	0.291039	-0.261919	-0.158555	0.187967	0.42511	-0.285346	0.0521637	-0.484535	0.0976942	-0.253253	-0.0505066	0.147381	-0.379781	0.603892	0.397434	-0.176247	-0.103145	-0.0278722	-0.152189	-0.265099	-0.0701314	-0.0805608	-0.066185	-0.537176	-0.0935928
CD68		0	-0.00020416	0.352829	1.19997	0.539969	1.6987	1.12563	0.360641	0.737904	0.704595	0.181065	0.0418493	0.23097	0.542073	0.410181	0.157342	0.237045	-0.0506917	0.0228859	0.0681809	0.0440291	0.390537	-0.223209	-0.182561	0.904861	0.222946	0.420742	-0.0220106	0.867754	0.441335	0.544035	0.367778	0.449132	0.792434	0.637809	1.00733	0.655154	1.08117	0.997753	1.52465	1.25922	1.14413
CTPS2		0	-1.10124	-0.754712	-0.681269	-1.27381	0.231108	-0.388288	-0.719796	-0.962888	-0.966854	-0.938417	-0.411213	-0.891121	-1.37438	-1.47181	-0.687466	-0.88837	-0.773961	-1.10376	-0.663994	-0.65979	-1.40965	-0.833161	-0.813111	-1.07713	-0.678181	-0.853353	-1.31678	-0.482148	-0.716966	-0.00933076	-0.607887	-1.08656	-0.727539	-0.845888	-0.80353	-0.719152	-0.529872	-0.823447	-1.03938	-1.1314	-1.0864
EGFR (Epidermal growth factor receptor) (PMID 22916088 22245996)		0	-1.37424	-0.914015	-0.753082	-0.435513	-1.12887	-0.762857	-0.478499	-1.60722	-1.61301	-0.365932	-0.785331	-1.48301	-2.14538	-1.96295	-1.55297	-1.39145	-0.526714	-1.78073	-1.4467	-1.5764	-1.85213	-1.53507	-1.85197	-0.90866	-1.37189	-1.85353	-1.58946	-0.788904	-0.361658	-0.846143	-1.97054	-1.42187	-2.37491	-1.46897	-1.77304	-0.346442	-1.83633	-1.70087	-1.8626	-0.351661	-0.0114328
Robo1		0	-0.166759	-0.187552	-0.422986	-0.625851	0.358984	-0.247802	0.0706428	-0.0341824	-0.0433298	0.553619	0.46032	-0.239056	-0.0607905	-0.322896	-0.0927072	0.357323	-0.223603	0.113324	0.191943	-0.139528	-0.686089	-0.956994	-0.646914	-0.506782	-0.600093	-0.357077	-0.452792	-0.101854	-0.952679	-0.949497	-0.684066	-0.820481	-1.62093	-0.946883	-1.47388	-1.57926	-1.5461	-1.61914	-1.63199	-1.09016	-1.59555
hmbs		0	-0.276552	-0.110605	-0.0148206	-0.0930513	-0.377931	-0.432446	-0.147332	-0.227337	-0.161228	0.015883	-0.193074	-0.394757	-0.0266694	-0.322896	-0.499648	-0.0269652	-0.449352	-0.277842	-0.0768307	-0.413586	0.121088	-0.750581	-0.73117	-0.430575	-0.461296	-0.687491	-0.804841	0.176267	-0.561727	-0.0872814	-0.296979	-1.05636	-0.582303	-0.571762	-0.94651	-0.885156	-1.03379	-0.81349	-0.912406	-1.11448	-0.612322
PHGDH		0	2.51935	0.291424	0.303225	-0.755748	0.0429727	-0.288021	-0.0691594	-0.140259	-0.371461	-0.575141	-0.23234	-0.417761	-0.620143	-1.03065	-0.4516	-0.0756589	-1.03041	-0.717849	-0.394732	-1.0042	-0.417138	-0.255682	-0.393506	-0.656449	-0.966568	-0.469467	-0.443859	-0.833422	-1.12288	-0.263641	-0.11402	-0.880957	-1.11655	-0.285366	-1.24804	-0.637274	-0.366491	-0.478539	-0.93657	-0.63673	-0.8643
Claudin 7		0	0.193836	0.277743	0.140965	-0.154122	0.51055	0.392057	-0.152003	0.207741	0.151035	0.0940712	-0.209838	0.976125	-0.408406	-0.428984	0.477165	0.3364	1.0309	0.709882	-0.107569	0.80358	1.08276	0.167316	0.353713	0.032617	0.374898	-0.0290267	0.465178	-0.105675	-0.017702	0.651997	0.23727	-0.494192	-0.515621	0.128143	-0.129054	-0.373228	0.306717	0.349577	-0.394463	-0.134999	-0.579913
GUSB		0	-0.77361	-0.330364	-0.0823821	0.194016	-0.320025	-0.609288	0.101197	-0.210412	-0.231763	-0.4632	-0.308861	-0.615342	-0.485372	-0.793277	-0.443828	-0.604822	-0.569135	-0.431912	0.00759743	-0.304599	-1.19517	-0.0167831	-0.508665	-0.40081	-0.320025	-0.111282	-0.418882	-0.130114	-0.470344	-1.47349	-0.434484	-0.650639	-0.312911	-0.61437	-0.724535	-0.823611	-0.733252	-0.857386	-0.657489	-0.708738	-0.406448
Lrp2		0	0.332217	0.0188152	0.612571	0.571147	1.33386	0.987144	0.141719	0.542934	0.479782	-0.605868	0.132755	0.46595	0.285941	0.296964	0.837514	0.985136	0.715587	0.582106	-0.153993	0.926013	-1.26371	1.20239	0.782873	1.06456	0.795484	1.13465	0.829167	0.341255	1.15355	1.71945	1.62378	1.50569	1.50166	2.39453	1.50505	1.94904	2.21842	2.10938	2.02622	1.92942	1.92088
pgk1		0	0.363701	0.176502	-0.0357823	-0.189952	0.525231	0.54503	-0.328152	0.170483	0.167827	0.0336789	0.0729277	0.566518	0.115153	0.478935	0.438535	0.500495	0.0911396	0.0700855	0.235578	0.265928	0.971759	-0.135997	0.377666	0.209163	0.570728	0.579022	0.216777	-0.232064	-0.0925031	0.340944	-0.323218	-0.415083	-0.517854	0.170724	-0.166298	0.145786	0.0595723	-0.0980141	-0.262844	-0.227765	-0.33413
NFATC3		0	-0.178279	-0.39993	-0.385996	-0.203691	-0.471896	-0.395335	-0.367401	-0.934573	-0.830487	-0.143437	-0.751784	-0.79658	-0.50458	-0.756289	-1.08397	-0.443363	-1.58957	-0.502686	-0.408473	-1.03728	-0.747541	-1.96033	-0.827192	-0.614348	-0.750909	-0.804464	-0.836173	-0.375561	-0.580221	-0.531892	-0.842945	-0.664512	-0.825219	-0.602131	-0.272116	-0.59651	-0.762695	-0.731928	-0.695541	-0.735878	-0.967714
Src		0	0.135576	0.41586	-0.661542	-0.258975	0.338609	0.165028	-0.646077	0.459093	0.342001	-0.257947	-0.29857	0.0593174	0.185649	-0.199903	0.702897	0.4771	0.622082	0.359067	0.525938	0.0960768	1.2003	-0.977275	0.608438	0.642493	0.685942	-0.281417	0.806496	0.266775	0.449271	1.05133	0.615557	0.513055	0.220715	0.787878	0.542643	0.413283	0.313371	0.654911	0.0691754	0.0822156	-0.29558
FSP1 (S100a4)		0	0.74666	-0.0971458	0.0487324	-0.549523	-0.0906222	-0.00332587	-0.160934	-0.0692736	-0.075001	-0.0883601	-0.686521	0.334286	0.310053	-0.574437	0.0321074	-0.00746062	-0.22814	-0.0834239	-0.531165	0.424573	0.578259	0.469795	0.0456459	0.826982	-0.109422	0.464605	0.0484755	0.00768662	0.143206	0.612818	0.463352	0.414439	0.405137	0.554931	0.582524	0.265424	0.251427	0.816004	1.01171	0.154114	1.3931
Epcam		0	0.120133	0.0712701	-0.165854	-0.479166	-0.251772	-0.306495	-0.136268	-0.360806	-0.37591	-0.474484	-0.685036	-0.682687	-0.85267	-1.16886	-0.781133	-0.339458	-1.01138	-0.640578	-0.610119	-0.686683	0.0793222	-0.763934	-0.821059	-0.790632	-0.634208	-0.506852	-0.42357	-1.19877	-0.506748	-0.616944	-1.08953	-0.837693	-0.95132	-0.339921	-0.736746	-0.940331	-1.02144	-0.550636	-0.74322	-0.551386	-0.997297
ipo8		0	0.397605	0.502294	0.29759	0.081012	0.334773	0.242189	-0.052203	0.389106	0.507691	0.66667	0.318315	0.362195	0.104261	-0.379524	0.294771	0.530065	0.247374	0.408109	0.109805	0.0816254	0.737043	0.257616	0.0158774	0.0939609	0.34809	-0.157566	0.216205	0.48255	0.168497	0.0768339	0.579197	0.25566	0.676936	0.395435	-0.115477	0.115327	0.226558	0.0598746	0.155853	0.165954	0.263359
FGF18		0	-0.113274	-0.04464	-0.371942	-0.0321008	-0.475907	-0.334738	0.432768	0.435379	0.496374	0.737427	0.222935	0.120457	0.571423	0.259321	0.769376	1.21232	1.44273	1.41385	1.03445	0.325343	1.88834	0.87782	0.820282	1.21156	0.844133	0.623339	0.0636938	0.719165	0.142502	-0.357327	-0.288934	-1.28628	-0.932158	-0.60161	-1.68204	-0.774626	-1.08005	-0.798968	-1.03238	-1.66645	-1.70265
POS_F		0	0.639253	0.202189	0.12624	0.0501858	0.369646	-0.235216	-0.377235	0.427749	0.339692	0.319372	0.319372	0.235103	0.687616	0.277853	0.24591	0.168506	0.455945	-0.078712	-0.205469	0.0624641	-0.0652915	-0.119739	0.256637	0.73441	0.465223	0.235103	0.639253	0.288345	-0.147754	0.0867116	0.379493	0.256637	0.339692	0.483602	0.764784	0.679667	0.606086	0.914531	0.779734	0.427749	0.224215
NME3		0	0.776996	0.168641	-0.0915183	-0.353259	0.942171	0.510944	-0.57123	0.317326	0.338337	0.0946973	-0.13186	0.449922	-0.281779	-0.260128	0.607309	0.624869	0.615672	0.585733	0.280532	0.665631	0.611052	1.05324	0.352673	0.461124	0.73808	0.777313	0.794814	0.610161	0.451613	0.618774	0.508716	0.449325	0.498168	0.662113	0.371709	0.594312	0.181044	0.540093	0.390912	0.186907	0.183799
N-Cadherin(CDH2)		0	0.203004	0.264323	0.0283942	-0.102173	-0.442546	0.267193	0.641699	1.03631	1.03607	0.537755	0.617706	1.11164	0.534144	0.410598	0.8698	1.16068	0.895335	1.03891	0.457277	0.482364	1.69904	0.52706	0.545275	0.820502	-0.017116	0.106839	0.364116	0.644061	0.40306	0.526482	-0.575416	0.0911746	0.0951901	-0.157102	-0.175797	-0.507029	-0.391552	-0.673344	-0.734192	-0.562004	-0.420402
LFNG (Lunatic Fringe) (PMID 19897741)		0	0.316398	0.00853887	-0.142927	0.0743864	-0.420369	-0.0236294	-0.263267	0.39352	0.250913	0.584786	0.064714	0.310869	0.383667	0.0204715	0.73415	0.58908	0.60932	0.367859	-0.105476	-0.276269	-0.558665	0.0474251	-0.236862	0.0783976	0.500453	-0.168366	0.644647	0.608905	0.627366	0.6743	0.90856	0.400185	0.564911	1.4707	0.653681	1.0773	0.268926	1.03318	0.733303	0.392796	0.483159
KRT18		0	-0.344891	-0.345086	-0.836387	-1.1086	-0.614623	-0.625766	-1.62932	-1.51556	-1.60475	-1.7134	-2.01748	-1.43181	-2.11941	-2.00259	-1.34096	-1.44517	-1.40456	-1.70966	-1.45688	-1.98395	-2.01586	-1.42245	-1.68054	-2.16994	-1.69842	-2.68906	-1.71572	-1.90961	-1.93589	-1.18338	-1.91204	-2.04531	-1.59123	-1.21471	-1.52634	-1.14187	-1.46638	-1.60578	-1.6041	-1.66639	-2.07252
TBX4		0	-0.0489054	0.148818	-0.850306	-0.571667	-1.6355	-0.161963	-0.0727166	0.387145	0.305883	1.03882	0.0741949	0.885828	0.485132	0.842671	1.0086	0.756241	1.17051	0.956423	0.908323	0.684916	1.10037	0.919215	1.00291	0.89663	1.4949	1.06621	1.10105	0.825027	0.237904	0.531486	0.703006	0.19219	0.245708	0.446447	0.466446	0.050002	0.499204	0.494988	-0.0337854	-0.269436	-0.414188
GATA-6		0	-0.433992	0.0146578	-0.126857	-0.166247	-0.988375	-0.48899	-0.637632	-0.315897	-0.229977	-0.248346	-0.530572	-0.531847	-0.58175	-0.420599	-0.702616	-0.4895	-0.757743	-0.490665	-0.770607	-1.46918	0.221317	-1.4076	-0.888579	-0.740913	-0.983751	-1.03609	-0.266015	-0.431891	-0.772023	-0.557498	-0.604837	-0.981086	-0.799478	-0.387107	-0.666653	-0.714881	-0.789491	-0.718462	-0.787878	-1.28523	-1.14212
tfrc		0	-0.825607	-0.181727	0.430154	-0.324708	0.114377	-0.0111813	0.264069	0.163785	0.195593	0.018911	-0.5692	-0.340242	0.121904	-0.0913077	-0.0703403	0.281045	-0.173043	0.193523	0.343288	0.262435	-1.34573	-0.613635	-0.223469	0.516165	-0.163587	-0.430396	0.202497	-0.0129663	0.347532	0.00684631	0.494583	0.419605	-0.0341419	0.529754	0.333791	0.282053	0.14122	0.371727	0.439622	0.30028	0.0199589
BCL2A1		0	0.407204	0.161018	0.822109	0.3331	-0.197035	0.383302	0.0475947	-0.348481	-0.277938	-0.489015	-1.08461	-0.765676	-0.0360684	-0.672342	-0.431282	-0.0375155	-0.81682	-0.567749	-0.441495	-0.483974	-0.820677	-0.479739	-0.699232	0.0351197	-0.775543	-0.342655	-0.781351	-0.0530188	-0.231485	0.233244	-0.0053708	-0.244211	0.0638144	0.135944	0.0267659	0.0683961	0.512123	-0.0141056	0.7036	0.532163	0.228014
Igfbp3		0	-0.00501395	-0.0270374	-1.60725	-1.69341	-1.22172	-1.36881	-1.97519	-2.06525	-1.98428	-3.09578	-2.5161	-1.87888	-3.78004	-3.93612	-2.95513	-2.40493	-2.26305	-2.29292	-3.17302	-2.08429	-1.55283	-1.52402	-1.84296	-2.50332	-1.74048	-1.24986	-0.813663	-1.82297	-0.580329	-0.137652	-1.54688	-1.0124	-0.914292	-0.377481	-0.52769	-0.628335	-0.501171	-0.660674	-1.23779	-1.38911	-0.931026
GFPT1		0	-0.342587	-0.0525013	-0.359165	-0.113271	0.0125067	-0.161074	-0.480605	0.0348606	0.118233	-0.555994	-0.93918	-0.201908	-0.616245	-1.30324	-0.416789	0.293746	0.221691	-0.0929115	0.0153906	0.0823353	-0.640427	-0.684251	-0.256858	0.0815261	-0.24186	-0.127047	-0.214308	-0.702254	-0.296419	0.135436	-0.710358	-0.720295	-0.744962	-0.200464	-0.380214	-0.278995	-0.671191	-0.378506	-0.666018	-0.738946	-0.605433
FOXF2		0	0.871959	0.465766	0.562448	0.587694	1.3976	0.930766	1.0294	1.64333	1.50105	1.91424	1.41411	2.27766	1.74143	1.24982	2.04799	2.6454	2.40282	2.69839	2.05725	1.5318	2.76166	2.63575	2.31015	2.73875	2.5696	2.15809	2.85852	1.60275	1.32198	1.82777	1.81235	1.20665	1.04851	1.55322	1.72994	1.27633	0.844126	1.80604	1.32377	0.490919	1.00793
CD38		0	0.666249	0.458381	0.0565264	-0.327714	-0.702459	-0.427599	-0.0721783	0.373612	0.359149	0.190295	-0.233263	0.318557	0.27357	-0.13206	0.280918	0.966642	1.21064	1.20256	0.0753565	0.741078	1.42229	0.798843	0.753428	0.997702	1.31241	1.30319	1.34125	1.07298	1.78441	2.00153	1.78114	1.40095	1.47018	1.24919	1.96799	1.1341	1.74054	1.71483	1.38223	1.2352	0.85161
SMAD3		0	-0.40567	-0.133802	-0.554445	-0.312968	-0.437146	-0.678013	-0.440546	-0.298499	-0.305945	-0.191829	-0.754443	-0.162888	-0.667253	-0.769647	-0.507202	-0.0873641	0.301956	-0.45143	-0.0674173	-0.491618	-0.74546	-0.227441	-0.202961	-0.322753	-0.550607	-0.174898	-0.482503	-0.631481	-0.704312	-0.63429	-0.568888	-0.963175	-0.851178	-0.693004	-0.919909	-0.703934	-0.999675	-0.781255	-1.05815	-1.19385	-1.3939
PRDX3		0	-0.266479	0.0518641	0.103367	-0.276808	0.0879923	-0.0279276	-0.186255	-0.655416	-0.533141	-0.519535	-0.358324	-0.779506	-0.589962	-1.08745	-0.883529	-0.432222	-0.83169	-0.493766	-0.453362	-0.640682	-0.34581	-1.32523	-0.581669	-0.746235	-0.444905	-0.766105	-1.13823	-0.116477	-0.793187	-0.553861	-0.89227	-0.815051	-0.604592	-0.656399	-0.635757	-0.418577	-0.67613	-0.49804	-0.744741	-0.530951	-0.856731
PRSS35		0	0.828181	0.157535	1.1249	1.47765	1.12908	1.32744	2.43553	2.47176	2.40716	2.87122	2.50085	2.74287	2.84503	2.73565	2.85581	2.9379	2.68475	3.12079	2.48216	2.19832	1.61219	1.84779	1.88167	2.2326	1.6901	1.20804	0.0529163	1.42734	-0.353214	0.230126	-0.524812	-1.89906	-0.457623	-1.38519	-1.7772	-1.71273	-1.20053	-1.71335	-2.06845	-1.71711	-1.66726
TST		0	-0.402608	-0.0725577	0.0177338	-0.263901	-0.974452	-0.919154	-0.748408	-0.926435	-0.833829	-1.37746	-1.35416	-0.88181	-1.61705	-2.4286	-1.18252	-0.936612	-1.21299	-1.33495	-1.60337	-1.29187	-0.636314	-1.52364	-1.5133	-1.49561	-1.55988	-1.83031	-1.03127	-1.135	-1.31793	-1.48372	-1.6678	-1.43455	-1.60496	-0.966109	-1.1104	-1.21531	-1.70955	-1.39824	-1.12874	-1.40991	-1.65947
EXT1		0	-0.296293	0.0129631	-0.217797	0.223507	-0.0429389	0.0579747	0.740313	0.147171	0.250222	0.446638	0.251284	0.555582	0.468563	0.161881	0.577115	0.470309	-0.0811958	0.422326	0.557263	-0.268032	0.197294	-0.0481558	0.241	0.227548	0.245966	-0.189744	-0.232999	0.212785	-0.216945	-0.214967	-0.377045	-0.412074	-0.490799	-0.337423	-0.663835	-0.308557	-0.866288	-0.325187	-0.642408	-0.583919	-0.599985
PDGFRb		0	-0.00892488	-0.0184432	-0.124565	0.29696	0.715722	0.544381	-0.0822435	0.336094	0.459142	1.03431	0.498777	1.7225	0.476712	0.59414	1.57412	1.03794	1.71988	1.96032	1.17552	1.67055	1.93994	2.35921	2.07207	1.45105	2.12332	1.95909	1.94657	1.01282	1.64411	2.15474	1.68446	1.00219	1.11231	0.935779	1.47251	1.16128	1.42241	1.01309	0.906324	0.521898	0.452752
ATP1B1		0	0.311952	0.528112	-0.6494	-0.77335	-0.73094	-1.1409	-1.5608	-1.27277	-1.22984	-1.7604	-1.75726	-1.58107	-1.38899	-1.78877	-1.37874	-1.07291	-1.55046	-1.2427	-1.99461	-1.96651	-0.705804	-1.65578	-1.91519	-1.49235	-1.66509	-1.81503	-0.954827	-1.68855	-0.982968	-0.788962	-0.755278	-0.148122	-0.540663	0.00109084	-0.849023	-0.225369	-0.978983	-0.363919	-0.497888	0.032105	-0.461032
DLK1		0	0.907815	-0.00406813	-2.39659	-3.13818	-2.19671	-2.33595	-2.45495	-1.82147	-1.74033	-2.6256	-2.6431	-1.42352	-3.8475	-3.79525	-3.9878	-3.7861	-4.50205	-5.53768	-4.4708	-5.51711	-6.28915	-5.35381	-5.82723	-6.90433	-6.24922	-5.3715	-6.95482	-6.28915	-6.09425	-5.40216	-6.32319	-6.85094	-5.69632	-7.22817	-6.70502	-6.0705	-5.87645	-6.85924	-7.58393	-6.32191	-7.64799
TGFB1		0	-0.798242	0.276819	-0.0166426	0.00360211	0.145718	0.0532865	0.105637	-0.0376039	0.00903825	0.0149994	-0.0603534	0.655683	-0.0234828	-0.0389413	0.114379	0.0941391	0.4698	0.252048	0.094186	0.248637	0.0639321	0.0385031	0.383155	0.415288	0.441861	-0.0974941	0.593171	0.353783	0.713065	0.773272	0.405299	0.239373	0.319712	0.379078	0.559985	0.471752	-0.10631	0.656446	0.15578	0.119767	0.313841
Hist1h2ab		0	2.00929	-1.07494	0.529857	0.38511	1.19381	1.83454	3.03808	2.60528	2.60334	3.30262	3.03593	1.6088	2.9884	2.90794	2.67904	2.29284	1.3452	2.38347	2.62193	1.84749	1.9815	1.01186	1.2939	1.68584	1.58462	0.77628	0.974396	1.73631	0.634097	0.207219	-0.0891957	-0.634957	-0.586128	-0.77218	-0.71495	-0.570084	-1.59158	-0.583022	0.0468796	0.502729	-0.014837
PDGFRA (platelet-derived growth factor receptor alpha) (PMID 23748534) (Most important)		0	0.0773313	0.24048	-0.149453	-0.352998	-0.666297	-0.242443	0.162406	0.133356	0.150246	0.719997	-0.1078	0.326895	-0.0120871	0.152814	0.331059	0.797706	1.16065	1.02335	0.995446	0.873196	0.89575	1.29018	1.19801	1.01442	1.10711	1.4502	1.28828	1.35603	1.71881	2.27113	1.90418	1.95237	1.9287	1.28353	1.90906	1.62121	1.94995	1.50843	1.259	1.15977	1.15934
ADAMTSL2		0	0.125326	0.00408228	-1.24074	-1.98164	-2.33724	-2.41137	-2.04401	-2.17166	-2.28964	-1.59784	-1.80923	-1.94301	-2.13824	-2.18459	-1.21451	-0.521341	0.608954	0.379261	0.197279	-0.0902972	0.772259	0.187329	0.270695	0.242902	0.913989	1.26465	1.10334	0.81433	1.87963	2.36013	1.57359	1.83535	1.28414	0.530601	0.804231	0.603104	0.771669	0.710528	0.157916	1.13204	0.336615
FGFR2		0	-0.320141	-0.187181	-0.452639	-0.347311	-0.657319	-0.648854	-0.69268	-0.657805	-0.63386	-0.557665	-1.25118	-0.422895	-1.02011	-1.2354	-0.650758	-0.401439	-0.523474	-0.840592	-0.816826	-0.918834	-1.79571	-0.90648	-1.14363	-1.10645	-0.722317	-1.2554	-0.538996	-1.05404	-0.293097	-0.408669	-0.47553	-0.397584	-0.556232	-0.0788943	-0.33329	-0.443419	-0.513486	-0.526351	-0.660557	-0.413987	-0.762196
TCF12		0	-0.429896	-0.0901705	-0.293283	-0.256378	-0.371676	-0.362765	-0.0947472	-0.236432	-0.126123	0.0447404	-0.686837	-0.184365	-0.368566	-0.609504	-0.605006	0.0882121	-0.389975	-0.221563	-0.283377	-0.622662	-0.422585	-0.213615	-0.645747	-0.467207	-0.306217	-0.620685	-0.527765	-0.524143	-0.426438	-1.05211	-0.849841	-0.728814	-0.916399	-0.804773	-0.822748	-0.854629	-0.986881	-0.661446	-1.02855	-0.985636	-0.896769
HIF1alpha		0	-0.0139815	-0.0829665	-0.182518	-0.36162	-0.0480341	-0.129535	0.012577	-0.0237764	-0.0144669	-0.0350879	-0.314231	-0.395295	-0.283546	-0.851446	-0.45011	-0.140915	-0.352249	-0.438941	-0.177385	-0.677607	-0.374027	-0.78046	-0.711229	-0.385703	-0.699515	-0.629839	-0.579525	-0.196324	-0.531987	-0.677522	-0.663326	-0.72273	-0.976084	-0.442493	-0.617945	-0.713154	-0.524631	-0.660115	-0.695617	-0.535196	-0.585844
integrin subunit alpha 8		0	-0.642497	-0.11725	-0.831582	-1.01906	-0.348921	-0.778027	-0.689338	-0.551954	-0.627912	-1.12591	-0.762975	0.152942	-0.588677	-0.709735	-0.621992	-0.0239253	0.0209474	-0.333744	-0.326166	-0.530863	-0.551387	-0.155477	0.0887625	0.229991	0.278684	-0.145782	0.805079	0.541283	0.788797	0.817982	0.576202	0.948005	0.29717	0.87333	0.765253	0.550574	0.448443	0.926878	0.520824	0.596356	0.283836
ABCA3		0	0.551214	0.515813	0.363836	-0.01424	-0.715589	-0.536275	-0.643284	0.339506	0.29006	-0.146308	-1.20266	-0.387937	0.289434	-0.3322	-0.0252534	0.205404	-0.286922	0.282869	-0.676319	-0.613858	-0.323403	-0.436658	-0.190857	0.154081	0.241161	-0.158823	0.615267	-0.198615	0.1754	-0.221786	0.600946	0.697718	0.259673	0.844934	0.358569	0.379239	0.0129247	0.525637	0.57886	0.30799	0.537875
E-Cadherin (CDH1)		0	-0.27225	0.104074	-0.904713	-0.648986	-1.06558	-0.690045	-1.18333	-0.349418	-0.422615	-1.2365	-1.5219	-0.756562	-1.29134	-1.27444	-0.520384	-0.371773	-0.343335	-0.790197	-1.05724	-1.01703	-0.997464	-0.879338	-1.06924	-0.529563	-0.931508	-1.03644	-0.369971	-1.28069	-0.520702	-0.145882	-0.877197	-0.818899	-1.08986	-0.440374	-0.489351	-0.603427	-0.99369	-0.60713	-0.949232	-0.855806	-0.747139
POS_E		0	0.678072	0.193183	-0.175318	-0.183446	0.189412	-0.395551	-0.416474	0.571985	0.277319	0.13946	-0.198193	0.380167	0.811655	0.181838	0.300816	0.280868	0.147258	-0.23827	-0.399333	0.200697	-0.388017	-0.354594	0.383472	0.672679	0.551562	0.38677	0.536795	0.273761	-0.107247	-0.0216951	0.416114	0.47307	0.115808	0.457473	0.672679	0.393342	0.51285	0.969535	1.06731	0.620411	0.0298352
Aqp5(Aquaporin)		0	0.238954	0.239433	-0.293156	0.204347	0.26096	0.055605	-0.402264	-0.210347	-0.238811	0.399553	-0.164207	1.09612	0.0154601	0.858727	0.727951	0.739789	1.59506	1.03015	1.08766	0.718444	0.345062	1.33075	1.1705	0.676092	0.966493	1.34875	1.03848	0.470615	1.17616	2.00911	0.570249	0.845042	0.825847	1.38309	1.05935	1.06884	1.2891	1.58257	1.15395	0.880873	0.63173
Chi3l3/Chi3l4		0	-0.0475613	-0.518794	-0.397427	-0.413436	-0.800871	-0.131961	-0.493873	-2.30655	-2.54434	-1.37636	-1.59017	-1.68686	-0.93557	-0.726735	-0.984788	0.585352	-0.11577	2.04557	-0.0977174	2.03553	0.738862	1.14427	-0.705599	3.83645	2.41279	4.1139	0.798659	1.21024	1.04125	1.9985	2.74965	2.59711	3.80351	2.53637	3.12605	3.15601	3.23973	2.93213	3.77504	3.56754	3.03073
ALDH1A1 (PMID 11751205)		0	-1.69514	0.0465635	0.317958	-0.234025	-0.408859	-0.13688	-0.45846	-0.402297	-0.429326	-1.88035	-1.93008	-1.04912	-1.44273	-2.02802	-1.11382	-1.13551	-1.97686	-1.34439	-1.97072	-0.943485	-0.939469	-1.86822	-1.76608	-1.20575	-1.19353	-2.01221	0.581243	-0.657828	-0.770713	0.0773495	-0.136314	0.327897	-0.257519	0.27976	0.898059	0.0395092	-0.83271	0.884971	0.607276	0.820436	-0.209146
polr2a		0	-0.329604	0.00314919	-0.162952	-0.327106	-0.71699	-0.515907	-0.475626	-0.725923	-0.676509	-0.650043	-0.53169	-0.791454	-0.890025	-1.0788	-1.14225	-0.820619	-1.03415	-1.0032	-1.04021	-1.13107	-0.347193	-1.35837	-1.10523	-1.02927	-0.915894	-1.48511	-0.972187	-0.758174	-0.8618	-1.05941	-0.669384	-0.700606	-0.738635	-0.992992	-1.01268	-0.860799	-1.07174	-1.14316	-0.99708	-1.03974	-0.920377
rplp2		0	0.706907	0.56771	0.143159	0.020274	-0.0403717	-0.104843	-0.01462	0.630784	0.648565	0.36615	-0.317773	0.021643	0.201685	0.181466	0.277248	0.294832	-0.0247963	0.332431	0.155629	-0.209044	0.428979	-0.265358	-0.202032	0.0788203	-0.155633	-0.93239	0.141988	0.223579	-0.121189	-0.730341	-0.318525	-0.28774	-0.593308	0.226449	-0.480221	-0.00814787	-0.58377	-0.186171	-0.288092	-0.381899	-0.27846
PDPn(Podoplanin)		0	-0.313605	0.478577	0.0978278	-0.0747358	-0.34482	-0.180325	0.0589472	-0.053728	-0.0059175	0.461038	-0.0937533	0.0948285	-0.0393819	-0.363717	-0.204487	0.37702	0.203873	0.338942	-0.0310471	-0.0956173	-0.0680625	0.456606	0.157608	0.762193	0.6441	0.801315	1.07518	0.813835	1.26391	1.54103	0.549062	1.06363	0.924736	1.48517	1.04562	1.05268	0.986136	1.48109	0.853964	0.882006	0.327178
Akt		0	-0.154271	0.514682	-0.297225	0.0427748	-0.263317	0.180094	0.254422	0.706332	0.641019	0.444121	0.148878	0.91087	0.29928	0.223806	0.691771	0.847925	1.00081	0.57249	0.305375	-0.15021	0.456309	0.736506	0.407191	0.485107	0.515652	0.10126	0.535634	0.0314282	0.214666	-0.430446	-0.165136	-0.373284	-0.481506	-0.0327913	-0.10171	-0.0951465	-0.339289	0.006235	-0.42866	-0.510898	-0.469785
Hist1h1b		0	1.82895	-0.939255	-0.0824552	0.233408	0.795517	1.26832	2.51763	2.0682	2.15381	3.04499	2.58658	2.33135	2.26863	2.74466	2.34812	2.29792	2.09031	2.28486	2.3284	1.25283	1.25667	0.203884	0.520717	1.05591	1.15865	-0.363685	0.586193	0.881155	-0.59611	-0.946695	-0.819253	-1.79013	-1.30036	-2.15565	-1.37963	-1.01797	-2.02875	-1.11575	-0.952675	-0.552144	-1.18825
LOX		0	0.101114	-0.0496317	-0.450831	-1.06959	-0.819636	-0.880963	-1.20007	-1.27103	-1.21158	-1.63987	-2.04904	-1.62481	-2.11597	-1.87625	-1.96399	-1.83094	-1.88905	-1.64968	-1.18761	-1.69169	-1.7945	-1.72269	-1.88835	-1.62165	-1.42817	-1.98129	-1.38836	-1.04678	-1.32083	-0.951151	-1.87079	-1.57971	-1.50577	-1.75033	-1.66514	-1.77596	-2.08505	-1.98582	-2.63047	-2.42335	-2.67685
P-63		0	-0.416813	-0.0685121	0.131201	-0.196098	-0.225931	-0.263095	0.0786178	-0.417099	-0.435292	-0.417955	-0.542466	-0.959964	-0.57201	-0.988309	-0.942043	-0.680981	-1.1826	-0.715642	-0.657428	-1.34288	-0.703073	-1.67513	-1.41158	-0.899172	-0.951603	-1.68104	-0.997155	-0.680981	-1.01354	-1.31618	-1.17516	-0.845058	-1.14677	-0.612253	-1.11473	-1.00984	-1.40471	-1.02524	-1.04424	-0.887465	-1.00441
Chi3l1		0	1.35183	0.237543	0.847489	1.237	0.953283	0.746735	1.21325	2.03833	1.97864	0.50332	-0.167887	0.863273	2.08827	0.123292	1.08399	1.38141	1.02556	1.00407	0.112068	0.407743	-0.355031	-0.202078	0.331698	3.30132	0.930175	1.09618	1.71106	0.934132	1.92725	0.570747	2.03023	2.62886	1.71595	3.66238	2.60768	2.94221	2.39992	2.98509	3.52453	2.85745	3.03434
Cdh11		0	-1.03032	-0.00295386	0.233664	0.198345	-0.0711538	-0.114	0.834406	0.560048	0.539151	0.986417	0.612071	0.133677	0.821743	0.507315	0.451152	0.764518	0.0450601	0.479751	0.740598	-0.147211	0.322743	-0.675561	-0.330112	0.00704489	-0.25353	-0.821323	-0.715672	0.0713	-0.771204	-0.8567	-0.72792	-0.568799	-1.06362	-0.656308	-1.05154	-1.14773	-1.18271	-1.03953	-1.02809	-1.15181	-1.42572
ywhaz		0	0.354423	0.411674	0.368014	0.353057	0.302431	0.261201	0.334114	0.646643	0.643868	0.633289	0.20499	0.339726	0.352118	0.240468	0.393534	0.685789	0.806541	0.493683	0.0768368	0.106781	0.373558	0.310087	0.340295	0.650275	0.393207	0.192809	0.545805	0.607393	0.65326	0.207996	0.471373	0.561794	0.216075	0.568928	0.376586	0.224706	0.172185	0.597206	0.292848	0.425367	0.640261
Tnc		0	-0.773644	0.646638	0.268582	0.752072	0.685893	0.743226	1.34629	1.51347	1.54641	1.8708	1.46157	1.78115	1.34929	0.992048	1.65012	2.1237	2.42787	2.16146	1.94784	1.50542	1.14794	1.34127	1.15596	1.7399	1.31122	0.444611	0.112569	0.593767	-0.479693	-1.08418	-1.72589	-1.94372	-2.1526	-1.44793	-1.92397	-2.35214	-2.31835	-2.1946	-2.46389	-1.67098	-1.90009
NDST1		0	-0.723925	0.105512	-0.332263	-0.0219026	-0.560936	-0.49815	-0.547691	-0.401171	-0.429928	-0.337001	-0.76609	-0.530709	-0.502421	-0.511269	-0.539178	-0.33883	-0.167804	-0.218555	-0.0225414	-0.963593	-0.723157	-0.449395	-0.37944	-0.525322	-0.0729635	-0.268593	-0.101683	0.0260913	0.0241505	0.0219468	-0.585132	-0.201154	-0.274104	0.0357445	-0.340087	-0.0153401	-0.229751	-0.0689334	-0.441293	-0.574191	-0.680255
Vegf		0	-0.511675	0.520402	0.0851597	0.282962	-0.566277	-0.622321	-0.425205	0.833545	0.69215	0.839077	-0.184516	0.148835	0.583963	0.00140599	0.975783	1.32871	0.918137	1.65495	0.69493	0.673635	1.04379	0.888115	0.672465	0.929982	1.32193	1.0185	1.45241	0.524936	1.16308	1.01447	1.35141	1.68121	1.38913	1.96368	1.62201	1.74109	1.61381	1.66976	1.81042	1.93322	1.54446
FOXF1		0	-0.931655	-0.420202	-0.360127	0.276952	-0.216134	0.154185	0.152268	0.214536	0.131957	1.16107	0.269778	1.56566	0.492055	0.667331	0.841933	1.35898	1.6404	1.54902	0.790729	0.187604	0.447564	1.09338	0.493369	0.994066	0.700691	1.12679	0.983717	0.423546	1.41534	1.69491	0.998487	1.22895	0.74996	1.4681	0.877449	1.19471	1.02217	1.17191	0.690137	1.28424	1.16867
Claudin5		0	-0.303746	-0.0447345	-0.503801	0.574889	0.122112	-0.0694193	0.21357	0.0767403	0.136851	0.792336	-0.041021	1.26463	0.295539	0.461427	0.583786	1.2668	1.77094	1.23217	0.419146	-0.0369269	0.574644	1.3563	0.664191	0.815822	0.705527	0.964188	1.02815	0.36632	1.5931	1.14509	0.915597	0.547031	0.0868006	1.19238	0.788555	0.580575	0.43361	1.01614	0.344684	0.523374	0.441114
Col1a1		0	-0.0232534	0.434409	0.306486	0.65416	1.00744	0.90974	1.20866	1.7392	1.78907	1.01567	0.742087	1.75573	0.592405	0.805181	1.01405	1.27202	1.19754	1.22213	1.52602	1.32481	1.14515	0.783229	1.05675	0.93631	1.12343	0.0340712	0.856572	0.850249	0.189433	-0.182354	-0.415709	-0.386637	-0.730298	-0.209539	-0.616816	-0.0591098	-0.74943	-0.394227	-0.797458	-0.61262	-0.829562
SFTP-D		0	-1.51308	0.472966	0.177181	-0.322691	-0.644548	-0.440844	-0.821371	-0.702024	-0.701045	-1.44353	-1.91579	-0.927374	-1.26006	-1.34455	-0.807233	-0.757029	-0.339959	-0.793596	-1.02519	-0.841118	-0.909644	-0.889482	-1.14807	-0.121516	-0.81532	-0.958889	-0.439632	-1.04208	-0.172203	-0.145128	-0.251685	-0.0866459	-0.257701	0.769241	0.211697	-0.0295367	-0.285749	0.150522	0.134545	0.219001	0.0904765
ppia		0	0.242057	0.221511	0.3644	0.189894	0.0484852	0.219397	0.519047	0.308027	0.34656	0.415181	0.0867101	0.171728	0.192149	-0.0666247	0.0377802	0.35174	0.199007	0.0991407	0.0031675	-0.264275	-0.118824	-0.288454	-0.396167	-0.0276547	-0.417671	-0.804151	-0.499998	0.0154003	-0.257614	-0.540449	-0.371714	-0.262535	-0.624704	-0.200764	-0.349931	-0.265375	-0.606564	-0.239424	-0.241659	0.0442433	-0.0372254
INMT		0	-1.11313	0.220673	-1.30891	-3.15362	-4.87709	-4.26604	-4.05921	-5.49603	-5.61431	-4.263	-4.44593	-4.5591	-4.40184	-4.97787	-4.73152	-4.53568	-4.04537	-4.06629	-2.75499	-3.46536	-1.60062	-1.29028	-0.872716	-2.44873	-0.828864	0.0229889	0.580724	0.812355	1.12961	1.68173	2.4635	2.59151	2.30955	2.20291	2.2382	2.09942	2.35052	1.84372	2.25789	2.14658	2.12988
VIM		0	-0.0219584	0.22676	0.015188	-0.0423919	-1.1456	-0.567859	-0.181892	0.344828	0.176274	0.754186	-0.068053	0.227244	0.696351	0.732458	0.67416	0.509284	0.755914	0.862767	0.517707	0.224807	0.416517	0.608936	0.396464	0.692715	0.752642	-0.364318	0.851154	0.488939	-0.0433238	0.00463423	0.668464	0.650153	0.162779	0.691244	0.286421	0.40314	-0.0838092	0.311759	0.408182	0.642834	0.625626
b2m		0	-0.301044	-0.356265	0.197739	0.213866	-0.241773	0.0662307	0.264319	0.707585	0.691902	0.420825	0.66393	0.777118	1.19505	1.41447	0.657022	0.429833	0.917363	0.587599	0.322513	0.543259	0.600259	0.348371	0.630642	0.87723	0.532235	0.808245	1.09449	0.777133	1.24769	1.44883	1.50814	1.70252	1.74523	1.2167	1.68332	1.58687	1.74012	1.91188	2.09416	2.16359	2.12541
gapdh		0	1.79854	0.359854	0.0114296	-0.321339	-0.19453	-0.27259	-0.152	0.0981883	0.0849903	-0.151008	-0.489892	-0.210912	-0.383435	-0.486704	-0.464139	-0.026431	-0.418825	-0.161017	-0.336936	-0.457459	-0.616331	-0.893682	-0.709212	-0.211388	-0.84191	-0.890487	-0.275811	-0.565101	-0.654505	-0.935368	-0.609217	-0.576347	-0.901742	-0.179313	-0.612516	-0.621068	-0.806025	-0.295718	-0.613268	-0.434811	-0.641676
POS_D		0	0.460596	0.0875313	-0.11551	-0.224432	0.00812788	-0.452655	-0.487058	0.400997	0.148155	0.184471	-0.0341691	0.0231021	0.569745	-0.0134532	0.147104	0.142892	0.171089	-0.218323	-0.355352	-0.123944	-0.510089	-0.558998	0.314691	0.519049	0.331445	0.131245	0.473232	0.161231	-0.0728366	-0.0282199	0.29442	0.259829	0.0127519	0.285372	0.575226	0.342048	0.345718	0.64688	0.696583	0.327274	-0.00408118
Eln		0	-0.453091	0.662322	-0.503513	-0.799653	-0.616875	-0.709375	-0.936132	0.316331	0.18558	-0.457399	-1.13011	0.355321	-0.0679866	-0.46972	0.79623	1.139	1.1156	1.71901	1.23339	1.58604	1.5178	1.3405	1.45733	1.82032	2.18112	1.4004	2.15391	1.78506	1.11774	1.7102	0.336993	0.174376	0.15194	0.101488	0.144613	-0.0476256	-0.435216	0.0773303	-1.02181	-1.35842	-1.62177
AGER		0	-0.231611	0.631575	0.26337	0.572932	0.0217143	-0.0464742	-0.226366	0.227671	0.213467	0.453814	-0.0319294	0.415533	-0.0897534	-0.145079	0.231919	0.392218	1.02161	0.612783	0.961573	0.345283	0.170777	0.66876	0.614228	0.638988	0.653884	0.814835	0.571722	0.794474	1.33934	1.19398	0.519578	0.976719	1.00968	0.958093	0.981365	1.00553	0.962333	1.15438	0.805274	0.702094	0.575014
POS_C		0	0.348276	-0.0119631	-0.206344	-0.11402	0.101891	-0.366069	-0.369994	0.154536	-0.0299665	0.167571	0.00909663	-0.0204225	0.418708	-0.0338538	0.103386	0.00556586	0.112247	-0.417448	-0.367703	-0.215291	-0.452919	-0.390948	0.101891	0.272866	0.146772	-0.0750482	0.0888414	0.0520283	-0.0155459	0.0282386	0.286023	0.10849	0.0772352	0.155674	0.498925	0.354138	0.353742	0.394133	0.516751	0.1259	-0.226073
actb		0	-0.47787	0.161441	-0.0487115	0.299456	-0.00946206	0.2012	0.13281	0.136561	0.200872	0.205145	0.169546	1.04658	-0.0906419	0.23285	0.390366	0.384685	0.806697	0.616021	0.469469	0.322182	0.352514	0.717951	0.558613	0.392405	0.230306	0.317295	0.214798	0.219293	0.347346	0.566965	-0.0388541	-0.0549002	-0.0764836	0.12797	0.127502	0.139768	0.212975	0.181346	-0.10478	0.00525865	0.0288888
SFTP-C		0	-0.254657	0.124623	0.267713	-0.0226586	-0.539108	-0.18326	-0.0953135	0.0250609	-0.0674355	0.196377	-0.514042	0.234184	0.190396	0.0682422	0.335516	0.384732	0.526055	0.536239	0.119929	0.561425	0.566848	0.649699	0.393074	0.617726	0.324903	0.513243	0.53127	0.276615	0.91463	0.883848	0.891138	1.01628	0.665399	1.35974	0.993149	0.800651	0.810616	0.98654	1.01779	1.10122	1.06787
