# Supplementary material for: Selecting the most appropriate time points to profile in high-throughput studies
Source: eLife journal article supplement (doi:10.7554/elife.18541), 2017-01-26
Supplement: supp [file elife-18541-supp-v1.zip › elife_poa_e18541_Supplementary_File_2.xlsx]

## Sheet: Sheet1
Gene Name	Accession #	Probe Name	Class Name	p0.5	P0.5	p0.5	p1	P1	P1	P1.5	P1.5	P1.5	P2	P2	P2	p2.5	P2.5	P2.5	P3	P3	P3	P3.5	P3.5	P3.5	P4	P4	P4	p4.5	P4.5	P4.5	P4.5	P5	P5	P5	P5.5	p5.5	P5.5	P5.5	P6	P6	P6	P6	P6	P6.5	P6.5	P6.5	P7	p7	P7
actb	NM_007393.1	NM_007393.1:815	Housekeeping	1852	2264	2485.14	2270	3815.89	224.464	1104	370	368	1344	1378	837	3894	3884	1907.95	4120.52	2666	1956	1885	648	1394.88	2617	1217	2148	188	3169	3896.06	6285	3094.4	1598	1365	2745	5351	5194.74	4537.38	2019	2074	1064	2610	655	1518	2606	4328.95	1520	2220	2805.8
ath-miR159a	MIMAT0000177	nmiR01610.1:1	SpikeIn	4	14	14.0019	6	17.1134	9.33459	14	8	10	4	87	14	28	24	17.1134	9.33459	12	9	17	17	9.33459	15	21	24	3	6	12.4461	12.4461	7.77882	12	8	10	13	9.33459	9.33459	12	5	8	5	10	15	13	15.5576	13	6	17.1134
b2m	NM_009735.3	NM_009735.3:177	Housekeeping	199	205	135.553	241	145.235	22.5921	96	43	48	166	183	411	316	220	96.8234	180.737	375	249	324	133	93.596	307	143	247	19	346	119.416	229.149	90.3685	248	176	292	338	177.51	119.416	434	292	265	220	71	173	302	319.517	459	662	142.008
cel-miR-248	MIMAT0000304	nmiR01612.1:1	SpikeIn	9	4	4.36376	9	14.5459	13.0913	11	3	5	13	13	5	19	23	14.5459	4.36376	9	17	16	11	8.72752	14	8	18	2	7	7.27293	11.6367	10.1821	16	4	15	5	11.6367	11.6367	11	12	10	6	10	11	11	10.1821	8	8	11.6367
Gapdh	NM_008084.1	NM_008084.1:755	Housekeeping	29	44	12.6727	63	13.94	2.53455	40	10	12	26	51	19	69	53	7.60365	13.94	43	42	59	19	8.87092	63	23	35	4	51	20.2764	17.7418	13.94	27	27	41	61	15.2073	19.0091	42	30	27	21	22	31	38	8.87092	34	44	13.94
mcmv-miR-m01-1	MIMAT0005533	nmiR01577.1:1	Endogenous2	13	24	21.1022	36	37.2391	22.3435	28	26	38	18	50	20	39	50	18.6196	32.2739	23	25	46	26	27.3087	25	47	50	14	12	42.2044	28.55	32.2739	32	14	15	15	37.2391	40.9631	39	26	24	25	18	24	19	40.9631	36	32	44.687
mcmv-miR-m01-2	MIMAT0005534	nmiR01578.1:1	Endogenous2	17	13	17.1183	18	19.9713	12.8387	14	7	14	15	28	9	29	27	22.8244	12.8387	21	13	27	23	11.4122	19	18	21	1	18	22.8244	22.8244	22.8244	18	8	16	20	14.2652	9.98565	23	12	15	11	19	27	11	8.55913	17	25	14.2652
mcmv-miR-m01-3	MIMAT0005536	nmiR01579.1:1	Endogenous2	10	12	9.19372	7	7.88033	6.56695	7	5	8	7	14	8	15	15	9.19372	14.4473	11	12	20	7	11.8205	9	8	16	2	12	10.5071	6.56695	6.56695	8	3	12	5	9.19372	5.25356	9	8	11	3	9	11	9	5.25356	7	8	6.56695
mcmv-miR-m01-4	MIMAT0005538	nmiR01580.1:1	Endogenous2	7	13	12.1717	4	12.1717	7.60732	12	8	8	11	24	15	22	23	9.12878	24.3434	19	12	28	15	13.6932	8	12	23	5	9	18.2576	15.2146	19.779	16	7	12	7	22.822	12.1717	17	11	10	6	11	17	5	19.779	9	13	16.7361
mcmv-miR-m107-1-3p	MIMAT0005556	nmiR01581.1:1	Endogenous2	12	15	36.8862	32	34.5065	26.1773	33	30	38	20	56	29	48	68	34.5065	27.3672	38	16	46	42	38.0761	22	86	57	19	15	22.6077	40.4559	36.8862	46	17	20	10	45.2154	35.6964	41	24	22	28	20	42	19	48.785	27	31	44.0255
mcmv-miR-m107-1-5p	MIMAT0005555	nmiR01582.1:1	Endogenous2	13	24	40.8739	34	30.3635	15.1817	29	19	26	21	44	29	46	53	17.5174	23.3565	18	20	40	28	28.0278	32	56	45	15	18	29.1957	29.1957	28.0278	23	19	11	18	33.867	28.0278	31	28	22	22	15	28	10	39.7061	20	27	26.86
mcmv-miR-m108-1	MIMAT0005558	nmiR01583.1:1	Endogenous2	13	18	22.9493	21	14.9171	12.6221	20	22	14	17	31	10	24	29	16.0645	18.3595	25	9	27	9	11.4747	15	23	26	3	20	11.4747	9.17973	18.3595	16	11	12	13	13.7696	12.6221	15	15	12	13	11	15	11	13.7696	8	16	18.3595
mcmv-miR-m108-2-3p	MIMAT0005561	nmiR01584.1:1	Endogenous2	4	9	9.31123	8	13.3018	9.31123	10	11	4	13	16	9	19	22	10.6414	10.6414	14	4	18	20	7.98106	8	15	21	4	6	10.6414	15.9621	9.31123	10	5	11	11	15.9621	10.6414	16	12	13	9	7	13	9	14.6319	8	10	13.3018
mcmv-miR-m108-2-5p.1	MIMAT0005560	nmiR01585.1:1	Endogenous2	18	19	36.6129	22	34.0879	30.3004	31	22	25	28	50	23	62	51	39.138	31.5629	31	34	44	31	30.3004	31	57	60	13	17	32.8254	34.0879	27.7753	35	15	11	15	44.188	32.8254	41	14	24	34	15	35	11	32.8254	27	29	36.6129
mcmv-miR-m108-2-5p.2	MIMAT0005559	nmiR01586.1:1	Endogenous2	21	28	34.2103	17	43.5404	21.7702	5	14	13	18	38	28	85	130	18.6602	31.1003	38	20	37	32	52.8705	19	53	104	18	12	46.6504	68.4206	40.4304	28	20	28	15	18.6602	34.2103	38	26	15	12	14	73	18	21.7702	18	28	15.5501
mcmv-miR-m21-1	MIMAT0005540	nmiR01587.1:1	Endogenous2	9	23	17.9562	24	16.6736	5.13035	11	12	11	11	39	19	27	30	23.0866	21.804	13	20	53	13	21.804	17	24	27	6	21	19.2388	21.804	19.2388	27	11	17	17	25.6518	14.1085	26	18	11	17	11	18	18	15.3911	18	25	17.9562
mcmv-miR-m22-1	MIMAT0005541	nmiR01588.1:1	Endogenous2	9	8	25.8941	15	15.8242	7.19281	13	5	6	9	24	13	19	40	21.5784	20.1399	30	6	27	18	15.8242	13	21	35	3	12	12.9471	25.8941	14.3856	14	5	10	13	20.1399	5.75425	14	17	9	16	7	22	17	12.9471	18	18	21.5784
mcmv-miR-M23-1-3p	MIMAT0005543	nmiR01589.1:1	Endogenous2	21	25	20.557	30	28.4635	17.3943	27	14	6	18	41	18	40	43	25.3009	15.813	23	18	34	19	18.9756	18	35	45	5	28	30.0448	30.0448	23.7196	18	9	20	21	36.37	6.32522	28	11	9	13	18	23	11	25.3009	8	21	18.9756
mcmv-miR-M23-1-5p	MIMAT0005542	nmiR01590.1:1	Endogenous2	9	10	24.5515	24	16.3676	22.2132	25	16	27	20	36	23	24	36	29.2279	12.8603	20	4	33	19	18.7059	17	36	25	6	5	16.3676	25.7206	23.3823	23	8	8	7	16.3676	17.5368	22	13	11	14	9	20	8	23.3823	12	24	16.3676
mcmv-miR-M23-2	MIMAT0005545	nmiR01591.1:1	Endogenous2	105	86	43.3959	10	28.9306	39.7796	30	14	9	43	44	73	57	62	36.1633	28.9306	63	29	114	83	43.3959	14	24	44	3	76	43.3959	32.547	57.8613	63	72	10	16	47.0123	36.1633	115	51	16	15	11	42	33	28.9306	64	124	39.7796
mcmv-miR-M44-1	MIMAT0005546	nmiR01592.1:1	Endogenous2	11	17	20.6171	13	20.6171	12.6874	16	7	10	16	27	16	28	38	22.203	15.8593	22	15	40	16	19.0312	10	15	33	3	15	14.2734	11.1015	22.203	12	8	11	14	15.8593	17.4452	23	16	13	23	12	23	15	19.0312	14	26	14.2734
mcmv-miR-M55-1	MIMAT0005547	nmiR01593.1:1	Endogenous2	11	10	14.821	18	14.821	9.88065	14	10	16	16	22	17	25	35	6.5871	8.23388	18	7	17	12	26.3484	17	24	24	9	13	18.1145	24.7016	23.0549	12	12	8	11	16.4678	18.1145	21	11	12	17	8	13	8	24.7016	21	12	18.1145
mcmv-miR-m59-1	MIMAT0005548	nmiR01594.1:1	Endogenous2	12	10	20.6843	10	14.3199	7.95551	17	8	5	15	20	12	36	42	12.7288	17.5021	18	13	23	19	15.911	9	15	26	8	9	14.3199	14.3199	7.95551	13	7	9	12	12.7288	14.3199	17	17	7	15	7	18	8	19.0932	13	8	11.1377
mcmv-miR-m59-2	MIMAT0005549	nmiR01595.1:1	Endogenous2	22	21	33.3839	28	24.3959	26.9639	39	27	31	18	50	25	41	68	34.6679	32.0999	32	20	55	26	33.3839	22	55	37	14	16	24.3959	33.3839	33.3839	35	19	22	16	46.2238	35.9519	38	19	17	18	15	27	10	29.5319	20	41	24.3959
mcmv-miR-M87-1	MIMAT0005550	nmiR01596.1:1	Endogenous2	6	8	19.1311	12	14.7162	11.773	17	5	13	16	20	14	21	28	11.773	4.41487	14	8	26	14	10.3014	16	13	22	4	10	8.82975	16.1879	17.6595	14	9	12	17	17.6595	16.1879	17	14	8	10	9	22	13	14.7162	12	14	16.1879
mcmv-miR-m88-1	MIMAT0005552	nmiR01597.1:1	Endogenous2	13	18	37.3335	26	52.5435	33.1853	30	21	28	13	72	21	64	77	20.7408	29.0372	35	20	52	41	35.9508	25	73	66	10	13	37.3335	44.2471	20.7408	31	18	23	14	41.4817	40.099	37	24	22	39	11	55	10	38.7162	38	30	34.5681
mcmv-miR-M95-1-3p	MIMAT0005554	nmiR01598.1:1	Endogenous2	27	29	32.3557	22	21.5704	19.1737	31	23	29	29	39	34	35	49	29.9589	41.9425	34	20	66	31	29.9589	15	21	45	4	22	38.3475	38.3475	37.1491	34	9	32	19	40.7442	16.777	33	28	18	20	20	26	21	34.7524	23	22	26.3639
mcmv-miR-M95-1-5p	MIMAT0005553	nmiR01599.1:1	Endogenous2	15	10	17.8524	20	20.2327	10.7114	23	15	12	19	32	18	31	34	32.1343	17.8524	21	9	42	18	29.7539	22	31	30	5	14	23.8032	23.8032	24.9933	22	5	10	9	23.8032	23.8032	22	22	13	15	10	16	18	23.8032	16	18	19.0425
mghv-miR-M1-1	MIMAT0001564	nmiR01600.1:1	Endogenous2	10	5	5.51415	14	6.89268	9.64976	12	11	9	8	35	10	26	24	13.7854	9.64976	14	8	19	16	11.0283	8	11	26	6	10	13.7854	20.6781	9.64976	16	5	7	7	12.4068	12.4068	9	13	10	6	8	18	8	8.27122	15	15	19.2995
mghv-miR-M1-2	MIMAT0001565	nmiR01601.1:1	Endogenous2	15	9	14.6447	18	24.4079	20.7467	35	15	13	12	36	12	49	43	30.5099	25.6283	24	16	40	23	34.1711	20	43	41	5	14	36.6119	23.1875	31.7303	23	14	10	7	34.1711	17.0855	28	13	12	17	19	36	11	32.9507	13	21	20.7467
mghv-miR-M1-3	MIMAT0001566	nmiR01602.1:1	Endogenous2	5	11	9.59827	6	11.198	6.39885	8	4	7	9	17	11	15	17	7.99856	11.198	8	3	15	15	9.59827	7	14	22	3	11	9.59827	11.198	9.59827	7	11	12	12	4.79914	14.3974	13	6	4	8	8	13	8	6.39885	9	7	7.99856
mghv-miR-M1-4	MIMAT0001567	nmiR01603.1:1	Endogenous2	21	23	41.5841	16	37.5598	30.8527	34	25	24	30	47	24	47	68	29.5113	26.8284	27	21	34	23	34.877	30	71	41	10	18	32.1941	34.877	45.6084	26	18	20	23	30.8527	48.2912	33	32	25	29	16	48	24	40.2427	23	35	41.5841
mghv-miR-M1-5	MIMAT0001568	nmiR01604.1:1	Endogenous2	14	24	21.0324	17	17.0888	6.57263	14	17	10	19	25	14	20	13	13.1453	18.4034	15	18	18	12	19.7179	13	22	41	5	17	14.4598	23.6615	18.4034	18	7	12	14	17.0888	17.0888	30	18	16	12	21	18	15	10.5162	18	21	21.0324
mghv-miR-M1-6	MIMAT0001569	nmiR01605.1:1	Endogenous2	9	7	5.27033	14	3.95275	17.1286	17	10	10	6	21	12	29	29	21.0813	17.1286	20	8	34	9	15.811	5	18	19	3	17	11.8582	17.1286	22.3989	14	5	4	8	27.6692	18.4462	17	14	9	12	7	17	7	7.90549	14	10	14.4934
mghv-miR-M1-7-3p	MIMAT0001571	nmiR01606.1:1	Endogenous2	10	13	9.01054	12	14.1594	10.2978	18	10	13	15	19	18	24	17	3.86166	11.585	32	11	25	15	12.8722	19	17	18	2	14	11.585	15.4466	14.1594	21	11	11	17	9.01054	23.17	18	16	10	13	13	13	8	5.14888	18	15	11.585
mghv-miR-M1-7-5p	MIMAT0001570	nmiR01607.1:1	Endogenous2	8	15	14.9331	15	34.3462	19.413	22	11	20	17	31	18	26	37	14.9331	11.9465	18	9	29	16	22.3997	7	27	40	5	11	28.3729	16.4264	23.893	23	8	4	16	28.3729	20.9064	23	18	9	17	14	18	8	13.4398	16	14	11.9465
mghv-miR-M1-8	MIMAT0001572	nmiR01608.1:1	Endogenous2	11	9	28.6174	21	31.0021	23.8478	22	12	32	12	30	13	32	45	27.425	20.2706	25	17	40	26	19.0782	19	65	41	7	12	26.2326	23.8478	23.8478	21	12	11	12	23.8478	22.6554	32	15	16	23	7	26	13	13.1163	22	19	21.463
mghv-miR-M1-9	MIMAT0001573	nmiR01609.1:1	Endogenous2	13	11	21.5154	15	15.778	8.60616	22	6	7	20	24	11	31	40	25.8185	15.778	14	11	30	20	14.3436	18	16	38	2	11	17.2123	30.1215	11.4749	20	9	11	21	25.8185	14.3436	33	12	12	8	6	31	24	18.6467	10	17	17.2123
mmu-let-7a	MIMAT0000521	nmiR00001.1:1	Endogenous1	3300	273	39.4665	442	39.4665	39.4665	623	1	1	1988	675	1265	6352	5915	39.4665	39.4665	1701	970	4008	986	39.4665	1	758	2629	151	2509	39.4665	39.4665	39.4665	1862	1669	1	841	39.4665	39.4665	3220	3652	283	6613	1	1888	1497	39.4665	1505	1794	39.4665
mmu-let-7b	MIMAT0000522	nmiR00002.1:1	Endogenous1	1932	1201	1484.85	1188	1209.88	274.973	1247	11	10	1754	1553	3110	5057	4588	439.957	824.919	3247	2001	3436	1126	769.924	580	1359	3443	227	4506	659.935	4289.58	549.946	3764	3534	1129	3772	549.946	934.908	6305	4027	1576	5996	9	3255	4324	439.957	4906	5919	384.962
mmu-let-7c	MIMAT0000523	nmiR00003.1:1	Endogenous1	4251	1427	2422.69	1062	2489.98	1547.83	1231	21	37	3361	1524	4867	8656	6368	1144.05	1615.12	2419	1593	5027	1728	2288.09	244	1122	3493	341	2818	2018.9	4643.48	2355.39	4803	5395	463	2556	1682.42	2288.09	14015	6761	1234	8984	16	3006	3708	1749.72	8908	11541	1547.83
mmu-let-7d	MIMAT0000383	nmiR00004.1:1	Endogenous1	3850	2981	3236.29	2159	2608.36	483.029	2333	36	40	2870	3031	2801	9308	7226	193.211	772.846	5942	4047	4241	1564	531.332	998	1864	5233	265	7270	579.634	4975.2	434.726	4087	3955	2245	6959	483.029	338.12	6009	4781	1896	5364	12	3782	5307	434.726	4808	4965	627.937
mmu-let-7e	MIMAT0000524	nmiR00005.1:1	Endogenous1	2112	1055	419.925	405	699.876	279.95	557	8	8	1287	913	1046	3846	3278	349.938	629.888	2064	1171	1962	854	489.913	114	631	2182	84	2725	629.888	1749.69	419.925	1524	1444	502	1599	489.913	489.913	2597	1781	374	1790	12	1536	2253	489.913	1573	2159	279.95
mmu-let-7f	MIMAT0000525	nmiR00006.1:2	Endogenous1	1366	335	1535.15	275	1074.61	1176.95	306	18	13	1085	632	646	2802	2036	1279.29	1279.29	978	527	1855	558	716.404	59	291	856	76	966	665.233	2200.38	767.576	881	753	182	613	1023.43	1381.64	2199	1599	218	1981	9	658	643	818.748	1327	1605	1586.32
mmu-let-7g	MIMAT0000121	nmiR00007.1:1	Endogenous1	4129	2756	3368.6	2547	4700.37	665.885	2349	33	35	3383	2148	2659	8088	7285	744.225	744.225	7574	4489	6064	2413	1057.58	1102	2076	4981	305	6841	665.885	6463	979.243	5096	3965	1872	6547	861.734	822.564	6376	5948	2533	8856	12	3314	5061	979.243	4733	4734	626.716
mmu-let-7i	MIMAT0000122	nmiR00008.1:1	Endogenous1	3421	1716	1634.71	1861	1330.57	304.131	1593	32	47	2644	2119	1864	6106	6153	456.197	456.197	6487	3624	4967	1493	418.181	1083	1916	4302	206	7020	494.213	3535.53	494.213	3392	2407	2266	5655	722.312	646.279	4622	3988	1657	6553	7	3207	4440	152.066	3451	3967	494.213
mmu-miR-1	MIMAT0000123	nmiR01009.1:1	Endogenous1	108	49	9.07939	46	10.3764	6.48528	34	17	11	29	392	30	336	205	6.48528	6.91763	614	118	102	60	5.18822	272	43	113	3	137	9.07939	8.64704	6.48528	42	22	32	62	7.78233	5.18822	28	153	10	48	7	58	59	4.32352	34	37	5.18822
mmu-miR-100	MIMAT0000655	nmiR01010.1:1	Endogenous1	47	28	94.265	31	117.831	47.1325	33	10	4	48	94	182	97	106	62.8433	78.5541	130	77	117	48	86.4096	25	55	112	15	126	31.4217	86.4096	94.265	151	108	79	210	70.6987	70.6987	258	159	58	121	9	113	193	86.4096	213	260	31.4217
mmu-miR-101a	MIMAT0000133	nmiR01011.1:1	Endogenous1	33	18	32.6353	8	45.1873	25.1041	20	13	18	26	27	63	65	65	37.6561	47.6977	23	17	49	26	22.5937	12	31	57	5	16	30.1249	22.5937	22.5937	22	15	16	15	32.6353	40.1665	76	30	11	38	6	36	25	37.6561	30	81	40.1665
mmu-miR-101b	MIMAT0000616	nmiR01012.1:1	Endogenous1	69	77	79.0017	23	68.8733	34.4366	54	13	16	92	91	76	114	94	56.7192	52.6678	80	63	85	69	34.4366	39	52	69	11	61	18.2312	109.387	79.0017	81	45	51	80	50.6421	46.5907	170	95	43	90	23	64	54	42.5394	85	150	62.7962
mmu-miR-103	MIMAT0000546	nmiR01013.1:1	Endogenous1	811	409	183.757	69	205.375	129.711	73	11	19	448	418	358	1011	995	118.901	129.711	1044	437	1058	251	162.138	49	260	764	27	1590	129.711	86.4738	151.329	450	484	254	499	172.948	108.092	866	416	59	397	14	600	685	118.901	365	543	75.6645
mmu-miR-105	MIMAT0004856	nmiR01014.1:1	Endogenous1	16	20	54.3077	27	40.4151	21.4705	36	27	35	18	58	28	48	56	31.5743	31.5743	30	17	50	39	36.6262	38	62	45	10	21	25.2594	35.3632	41.678	34	24	19	17	54.3077	42.941	40	23	24	25	19	40	19	44.204	29	33	30.3113
mmu-miR-106a+mmu-miR-17	MIMAT0000385	nmiR01015.1:1	Endogenous1	658	292	109.476	319	144.982	47.3409	280	38	37	487	476	196	1201	1248	85.8054	62.135	1299	719	1230	340	56.2174	139	467	869	62	1668	79.8878	106.517	56.2174	595	432	486	1010	94.6819	76.929	912	724	207	976	16	635	805	68.0526	435	484	76.929
mmu-miR-106b	MIMAT0000386	nmiR01016.1:1	Endogenous1	341	230	41.0526	46	100.351	41.0526	51	14	13	222	111	155	832	646	54.7368	82.1052	554	192	481	161	54.7368	29	118	441	11	571	68.421	77.5438	45.614	286	253	86	214	36.4912	45.614	783	339	46	404	12	269	324	36.4912	386	512	31.9298
mmu-miR-107	MIMAT0000647	nmiR01017.1:1	Endogenous1	221	69	112.961	38	112.961	67.7764	40	13	11	160	96	139	292	278	62.1284	84.7205	182	111	254	57	90.3685	25	94	196	5	226	96.0166	107.313	96.0166	146	153	60	125	79.0725	118.609	306	90	30	86	5	197	169	62.1284	113	273	79.0725
mmu-miR-10a	MIMAT0000648	nmiR01018.1:1	Endogenous1	251	105	78.5041	135	52.3361	26.168	125	15	17	280	183	348	464	582	69.7814	47.9747	344	219	336	83	65.4201	77	159	348	42	418	69.7814	100.311	47.9747	303	223	228	504	65.4201	52.3361	555	281	137	493	16	291	417	52.3361	273	622	56.6974
mmu-miR-10b	MIMAT0000208	nmiR01019.1:1	Endogenous1	32	42	34.9478	14	34.9478	20.9687	16	9	14	42	64	44	74	129	20.9687	13.9791	47	39	67	39	18.6388	19	54	104	15	24	23.2985	30.2881	18.6388	45	10	21	16	30.2881	27.9582	40	38	20	24	20	64	27	20.9687	27	42	25.6284
mmu-miR-1186	MIMAT0005836	nmiR01020.1:1	Endogenous1	143	56	32.0102	59	64.0203	32.0102	67	14	13	150	117	130	241	257	56.907	21.3401	219	112	185	54	35.5669	51	74	168	16	216	46.2369	53.3503	39.1235	102	98	80	160	39.1235	24.8968	207	154	67	221	11	112	156	17.7834	129	165	46.2369
mmu-miR-1186b	MIMAT0015644	nmiR01021.1:1	Endogenous1	12	14	12.9213	13	11.3061	12.9213	16	12	11	16	16	24	26	32	20.9971	14.5365	21	12	12	13	20.9971	11	12	26	4	14	24.2275	14.5365	14.5365	11	9	13	25	25.8426	12.9213	8	9	13	12	11	25	10	17.7668	14	18	14.5365
mmu-miR-1187	MIMAT0005837	nmiR01022.1:1	Endogenous1	13	25	27.3397	14	20.5048	34.1746	26	12	5	13	141	13	52	43	27.3397	25.631	26	20	38	24	10.2524	14	28	40	5	25	6.83493	32.4659	11.9611	22	13	24	29	13.6699	10.2524	37	14	10	13	6	43	16	17.0873	14	18	25.631
mmu-miR-1188	MIMAT0005843	nmiR01023.1:1	Endogenous1	9	7	18.1802	13	18.1802	9.91648	14	6	6	12	20	11	14	15	4.95824	16.5275	18	11	25	14	13.222	4	19	22	3	11	11.5692	8.26374	16.5275	16	8	9	13	24.7912	16.5275	15	10	7	14	10	12	16	9.91648	12	11	19.833
mmu-miR-1190	MIMAT0005847	nmiR01024.1:1	Endogenous1	10	20	28.7016	26	33.2335	19.638	26	18	17	16	29	28	56	58	16.6167	25.6804	27	12	22	25	21.1486	19	53	62	18	13	37.7653	48.3396	34.7441	29	15	11	16	37.7653	31.7229	21	19	16	24	8	27	14	22.6592	20	23	22.6592
mmu-miR-1191	MIMAT0005849	nmiR01025.1:1	Endogenous1	21	40	20.3888	16	79.5162	16.311	133	7	9	33	40	27	47	35	8.15551	20.3888	25	15	106	46	22.4276	10	14	35	10	21	18.3499	55.0497	18.3499	28	24	23	12	20.3888	28.5443	81	26	18	12	14	30	29	30.5831	30	71	18.3499
mmu-miR-1192	MIMAT0005850	nmiR01026.1:1	Endogenous1	10	10	27.1582	14	17.1526	15.7232	14	10	14	14	35	17	25	38	18.5819	22.8701	11	12	28	22	25.7288	12	18	22	4	8	8.57628	18.5819	17.1526	16	6	11	8	17.1526	10.0057	19	14	12	18	8	34	21	18.5819	20	13	15.7232
mmu-miR-1193	MIMAT0005851	nmiR01027.1:1	Endogenous1	31	33	40.2748	22	9.58923	13.4249	23	11	12	28	165	16	103	83	19.1785	34.5212	50	40	47	29	17.2606	31	42	92	9	37	11.5071	30.6855	19.1785	25	17	20	29	11.5071	13.4249	36	21	19	28	4	54	25	19.1785	25	29	21.0963
mmu-miR-1194	MIMAT0005852	nmiR01028.1:1	Endogenous1	3	11	9.63027	7	11.2353	8.02522	12	15	7	10	14	9	15	20	12.8404	4.81513	12	7	12	7	8.02522	5	13	13	3	9	8.02522	14.4454	11.2353	5	7	11	9	14.4454	12.8404	9	11	8	5	9	17	14	9.63027	9	17	6.42018
mmu-miR-1195	MIMAT0005856	nmiR01029.1:1	Endogenous1	10	8	12.6016	5	3.15039	4.72558	10	6	7	6	11	11	20	16	6.30078	14.1767	11	13	19	8	9.45117	4	10	19	2	13	9.45117	9.45117	17.3271	8	7	15	9	7.87597	6.30078	14	11	4	7	3	9	13	14.1767	14	11	7.87597
mmu-miR-1196	MIMAT0005857	nmiR01030.1:1	Endogenous1	19	17	30.9261	25	52.5744	23.1946	28	17	26	34	68	29	68	83	32.4724	32.4724	35	18	45	28	38.6576	18	56	58	13	30	40.2039	34.0187	34.0187	34	27	14	18	52.5744	34.0187	35	24	26	45	11	35	20	30.9261	39	34	43.2965
mmu-miR-1197	MIMAT0005858	nmiR01031.1:1	Endogenous1	18	27	35.7097	22	40.3174	26.4943	36	14	36	15	49	25	51	53	24.1905	18.4308	44	11	42	30	34.5578	27	58	58	9	18	27.6462	28.7982	28.7982	42	19	14	12	47.229	28.7982	33	24	23	22	13	26	12	29.9501	21	23	18.4308
mmu-miR-1198	MIMAT0005859	nmiR01032.1:1	Endogenous1	19	20	17.8246	21	19.8051	11.883	16	14	9	23	27	27	30	52	15.8441	15.8441	39	24	33	15	13.8636	14	19	38	5	25	17.8246	19.8051	7.92203	19	18	23	34	21.7856	21.7856	32	28	16	30	5	24	27	13.8636	21	28	23.7661
mmu-miR-1199	MIMAT0005860	nmiR01033.1:1	Endogenous1	7	15	12.1451	6	12.1451	4.85804	7	7	8	9	15	11	19	18	9.71608	14.5741	7	7	15	11	6.07255	9	8	12	4	6	8.50157	14.5741	18.2177	10	3	4	4	7.28706	9.71608	15	6	6	5	5	11	6	7.28706	9	9	4.85804
mmu-miR-122	MIMAT0000246	nmiR01034.1:1	Endogenous1	25	21	18.4331	25	20.4812	8.1925	22	8	12	26	29	24	52	50	16.385	28.6737	27	24	45	14	24.5775	21	29	48	2	55	36.8662	40.9625	24.5775	28	12	15	20	36.8662	16.385	35	15	16	17	12	34	25	26.6256	22	26	20.4812
mmu-miR-1224	MIMAT0005460	nmiR01035.1:1	Endogenous1	26	27	26.5825	36	19.4938	8.86083	32	8	13	16	40	26	48	51	24.8103	38.9877	33	15	43	9	21.266	23	20	40	8	26	21.266	24.8103	28.3547	22	8	38	24	12.4052	30.1268	20	29	21	29	13	22	18	26.5825	16	25	24.8103
mmu-miR-124	MIMAT0000134	nmiR01036.2:2	Endogenous1	19	15	21.2675	18	19.8496	14.1783	27	25	14	17	30	12	31	28	18.4318	17.014	22	21	51	22	18.4318	13	20	31	6	21	22.6853	22.6853	15.5961	15	10	14	26	14.1783	17.014	32	19	9	9	15	21	12	17.014	16	31	12.7605
mmu-miR-125a-3p	MIMAT0004528	nmiR01037.1:1	Endogenous1	65	52	98.1833	74	77.2932	54.3142	89	38	40	89	118	80	170	228	50.1362	58.4922	109	90	135	83	77.2932	51	122	185	27	88	62.6702	104.45	81.4712	117	68	44	82	81.4712	83.5603	143	85	52	105	12	100	76	75.2042	83	94	66.8482
mmu-miR-125a-5p	MIMAT0000135	nmiR01038.1:1	Endogenous1	1901	1130	301.333	1162	494.495	34.7692	1235	47	46	1616	1868	816	3026	3795	69.5383	88.8545	3225	2274	2382	699	112.034	458	1107	2133	166	3550	88.8545	359.281	127.487	2054	1469	1653	3568	65.6751	69.5383	2693	1909	935	2589	18	1719	2976	115.897	1837	2547	100.444
mmu-miR-125b-3p	MIMAT0004669	nmiR01039.1:1	Endogenous1	10	11	36.9244	21	31.0942	25.2641	12	16	25	27	39	34	50	45	40.8112	34.981	29	23	36	21	42.7546	18	38	36	10	34	44.698	25.2641	38.8678	22	15	22	15	36.9244	44.698	37	30	17	21	12	33	18	31.0942	31	33	21.3773
mmu-miR-125b-5p	MIMAT0000136	nmiR01040.1:1	Endogenous1	1990	936	7374.07	422	5112.69	1376.49	497	145	171	1655	3130	4780	3920	4471	2654.67	10618.7	3560	2270	2946	787	3637.88	593	1211	2816	115	5387	3047.95	4424.44	2949.63	2164	1708	2257	3868	5407.65	5505.97	3297	2298	445	2431	25	2560	3896	2752.99	1459	3190	2654.67
mmu-miR-126-3p	MIMAT0000138	nmiR01041.1:1	Endogenous1	2987	1231	4388.91	1750	7900.04	62.6987	1888	23	30	3685	1272	5060	5904	6549	250.795	626.987	4403	2581	4042	1047	188.096	821	1684	3854	204	6103	626.987	8652.42	313.494	3138	2374	2203	5499	125.397	313.494	5097	3945	2239	6319	2	3560	4797	125.397	3562	4838	62.6987
mmu-miR-126-5p	MIMAT0000137	nmiR01042.1:1	Endogenous1	905	513	1074.84	276	859.871	358.28	446	9	13	1041	380	807	3195	1852	931.527	859.871	897	356	1851	478	788.215	85	356	1289	64	1048	644.903	2221.33	716.559	775	587	229	855	644.903	501.591	2385	1688	322	2184	10	806	825	358.28	2765	1963	1146.49
mmu-miR-127	MIMAT0000139	nmiR01043.2:2	Endogenous1	365	324	14.0883	117	28.1766	7.04415	123	8	6	130	235	17	475	384	16.906	16.906	206	120	336	95	9.86181	57	52	136	11	248	21.1324	12.6795	14.0883	98	80	32	69	15.4971	8.45298	146	165	38	241	12	71	54	11.2706	97	76	12.6795
mmu-miR-1274a	MIMAT0009445	nmiR01044.1:1	Endogenous1	17	11	14.1942	13	16.2219	8.11095	6	8	8	11	15	17	54	75	10.1387	12.1664	18	7	28	10	10.1387	8	12	22	3	13	6.08321	16.2219	14.1942	11	6	4	12	18.2496	22.3051	19	11	5	13	2	18	13	10.1387	10	13	14.1942
mmu-miR-128	MIMAT0000140	nmiR01045.1:1	Endogenous1	25	21	25.6327	23	17.0885	10.2531	21	10	14	21	35	32	58	40	17.0885	10.2531	22	22	37	18	17.0885	19	18	33	5	35	22.215	17.0885	8.54424	22	22	19	23	23.9239	22.215	88	17	12	31	9	33	18	15.3796	25	36	17.0885
mmu-miR-129-3p	MIMAT0000544	nmiR01046.1:1	Endogenous1	17	27	44.6162	26	35.3852	41.5392	38	22	39	26	215	26	86	93	38.4622	40.0007	43	32	39	39	46.1547	27	91	81	18	17	30.7698	52.3086	33.8467	40	18	17	20	41.5392	35.3852	35	30	26	29	19	66	24	27.6928	45	47	49.2316
mmu-miR-129-5p	MIMAT0000209	nmiR01047.1:1	Endogenous1	12	18	30.7785	31	19.6983	16.0048	42	22	27	20	48	31	49	46	19.6983	22.1605	34	20	44	22	25.854	33	67	51	11	19	19.6983	25.854	46.7833	34	12	8	8	23.3917	33.2408	35	27	14	29	19	31	17	24.6228	22	28	29.5474
mmu-miR-1306	MIMAT0009411	nmiR01048.1:1	Endogenous1	13	14	23.3185	18	35.6636	19.2035	18	12	22	14	39	20	33	47	16.4601	23.3185	22	16	38	27	34.2919	25	50	42	9	7	21.9468	27.4336	28.8052	22	9	10	12	38.407	32.9203	31	23	9	15	15	17	20	28.8052	21	36	30.1769
mmu-miR-130a	MIMAT0000141	nmiR01049.1:1	Endogenous1	2489	1463	395.813	406	450.238	54.4243	425	128	133	1702	2164	855	4885	5041	89.058	188.011	4623	2310	4000	1100	84.1103	459	1160	3134	122	7298	98.9533	282.017	59.372	1419	1050	2078	3515	128.639	143.482	1911	2199	361	3676	7	2070	2950	84.1103	964	1431	64.3196
mmu-miR-130b	MIMAT0000387	nmiR01050.2:2	Endogenous1	134	80	26.2833	56	50.5448	6.06538	71	8	13	109	56	57	169	209	28.3051	18.1961	105	65	113	43	20.2179	29	48	101	9	126	12.1308	24.2615	36.3923	70	60	33	60	30.3269	28.3051	120	73	31	134	7	63	79	18.1961	68	89	12.1308
mmu-miR-132	MIMAT0000144	nmiR01051.1:1	Endogenous1	51	63	50.2022	44	75.3033	15.0607	45	10	18	64	81	45	104	112	32.6314	40.1618	97	71	83	43	35.1415	38	74	94	9	74	27.6112	42.6719	57.7325	70	58	41	78	57.7325	35.1415	136	67	46	81	12	65	67	37.6516	86	112	30.1213
mmu-miR-133a	MIMAT0000145	nmiR01052.1:1	Endogenous1	27	26	24.1647	44	28.1921	13.6933	41	31	47	23	105	25	101	87	19.3318	17.7208	54	32	53	21	32.2196	51	71	55	8	14	22.5537	19.3318	17.7208	44	18	11	28	19.3318	26.5812	38	29	20	33	15	44	30	27.3866	31	24	20.1372
mmu-miR-133b	MIMAT0000769	nmiR01053.1:1	Endogenous1	10	13	23.9996	15	53.1419	22.2853	34	15	32	21	148	23	44	54	18.8568	22.2853	35	20	28	20	20.5711	19	41	37	8	12	18.8568	30.8566	20.5711	29	19	14	19	30.8566	25.7138	21	26	15	11	6	31	8	17.1425	28	27	23.9996
mmu-miR-134	MIMAT0000146	nmiR01054.2:2	Endogenous1	32	26	29.6242	51	23.9273	18.2303	55	20	20	28	56	28	63	96	20.5091	17.0909	54	20	48	39	28.4848	32	53	55	13	36	14.8121	29.6242	17.0909	31	20	12	29	21.6485	21.6485	48	28	26	27	12	31	14	12.5333	33	37	17.0909
mmu-miR-135a	MIMAT0000147	nmiR01055.1:1	Endogenous1	34	40	48.0433	56	42.5526	37.062	51	28	33	36	55	52	67	69	32.944	39.8073	51	31	53	39	32.944	39	68	73	19	42	27.4533	56.2793	32.944	44	29	54	34	57.6519	35.6893	48	41	28	54	17	43	26	46.6706	36	53	49.4159
mmu-miR-135b	MIMAT0000612	nmiR01056.1:1	Endogenous1	66	35	13.6211	23	22.7018	21.1883	14	15	12	24	43	19	81	70	25.7287	18.1614	61	33	59	26	21.1883	14	24	41	4	36	19.6749	22.7018	16.648	25	9	15	22	21.1883	24.2152	32	24	17	19	11	27	19	13.6211	19	32	19.6749
mmu-miR-136	MIMAT0000148	nmiR01057.1:1	Endogenous1	1022	560	356.25	742	173.222	52.2935	725	92	75	736	870	145	1506	1184	45.7568	166.686	1401	635	1418	588	52.2935	425	313	780	44	1186	68.6352	232.052	68.6352	421	259	494	668	52.2935	91.5136	702	582	231	842	11	420	406	35.9518	559	632	35.9518
mmu-miR-137	MIMAT0000149	nmiR01058.1:1	Endogenous1	44	27	27.0779	40	33.4492	20.7067	37	19	19	51	63	29	70	65	52.563	31.8564	62	39	76	33	19.1138	24	29	49	6	36	35.042	31.8564	27.0779	34	13	28	35	35.042	25.4851	41	36	23	41	12	41	25	35.042	28	30	31.8564
mmu-miR-138	MIMAT0000150	nmiR01059.1:1	Endogenous1	41	32	25.086	26	20.5249	13.6833	26	17	11	38	48	34	68	111	34.2082	18.2444	85	43	99	43	36.4888	10	29	60	4	100	29.6471	25.086	27.3666	37	26	37	58	27.3666	34.2082	57	40	13	74	11	40	54	31.9277	24	53	27.3666
mmu-miR-139-3p	MIMAT0004662	nmiR01060.1:1	Endogenous1	13	23	30.1256	18	27.3869	15.0628	25	12	11	22	42	27	59	47	21.9096	21.9096	33	20	36	20	24.6482	22	26	30	5	17	17.8015	32.8643	35.603	21	9	21	13	23.2789	20.5402	23	15	17	18	11	23	14	21.9096	14	17	26.0176
mmu-miR-139-5p	MIMAT0000656	nmiR01061.1:1	Endogenous1	17	16	10.2175	18	28.9495	8.51457	20	4	4	14	30	12	42	43	15.3262	15.3262	17	16	30	19	22.1379	14	16	27	10	33	15.3262	20.435	15.3262	25	9	9	19	20.435	18.7321	24	18	12	13	9	14	13	5.10874	17	26	15.3262
mmu-miR-140	MIMAT0000151	nmiR01062.1:1	Endogenous1	164	76	56.8827	23	107.445	25.2812	42	16	12	112	107	212	352	304	50.5624	63.203	233	105	210	64	56.8827	18	64	176	8	279	63.203	69.5233	63.203	77	73	91	134	56.8827	113.765	170	112	19	135	9	100	133	82.1639	56	157	75.8436
mmu-miR-141	MIMAT0000153	nmiR01063.1:1	Endogenous1	536	367	91.4286	54	246.857	36.5714	71	12	9	353	211	347	1195	935	36.5714	45.7143	584	287	556	180	54.8571	25	157	530	6	648	36.5714	109.714	128	259	325	125	348	36.5714	64	704	282	36	319	7	304	430	91.4286	201	569	91.4286
mmu-miR-142-3p	MIMAT0000155	nmiR01064.1:1	Endogenous1	481	226	93.1583	166	248.422	85.3951	101	9	13	324	166	854	1080	801	100.921	108.685	1257	455	1003	258	85.3951	30	299	845	13	909	77.6319	147.501	69.8687	310	206	269	497	69.8687	85.3951	1046	907	92	1586	9	328	401	100.921	616	744	100.921
mmu-miR-142-5p	MIMAT0000154	nmiR01065.1:1	Endogenous1	254	126	148.759	94	191.261	110.506	106	26	30	227	175	216	498	425	110.506	131.758	418	215	372	135	114.757	56	185	298	19	439	123.257	123.257	127.507	227	180	117	291	80.7547	89.2552	439	288	80	367	12	213	254	110.506	247	393	140.258
mmu-miR-143	MIMAT0000247	nmiR01066.1:1	Endogenous1	2409	1258	194.101	169	1035.2	51.7602	225	41	28	1727	1873	1251	4642	4057	155.281	401.142	4911	1977	4184	1224	181.161	126	850	3344	74	5615	142.341	336.441	103.52	1975	2104	973	2345	181.161	155.281	4850	2477	219	2540	9	2234	2692	90.5804	1621	3314	155.281
mmu-miR-144	MIMAT0000156	nmiR01067.1:1	Endogenous1	581	263	81.564	168	37.0745	40.782	242	14	14	62	74	190	2332	1223	44.4894	55.6118	1004	266	188	73	66.7342	38	118	548	5	102	44.4894	63.0267	63.0267	64	36	221	483	29.6596	55.6118	768	414	30	528	10	87	100	37.0745	2069	2680	48.1969
mmu-miR-145	MIMAT0000157	nmiR01068.1:1	Endogenous1	2100	696	117.953	348	442.322	68.8057	397	6	7	1872	766	1495	3066	3543	39.3176	58.9763	1758	897	3177	712	39.3176	107	740	2204	131	3060	98.2939	344.029	88.4645	1665	1634	454	1368	29.4882	49.1469	3834	2312	377	2800	5	1774	2438	78.6351	2062	3723	88.4645
mmu-miR-146a	MIMAT0000158	nmiR01069.1:1	Endogenous1	841	335	255.256	182	326.491	207.767	262	23	39	767	334	1011	1732	1535	166.213	142.469	852	494	1070	320	243.384	68	338	798	65	854	219.639	207.767	201.831	666	583	151	487	261.192	154.341	1424	884	262	1407	20	462	651	172.15	880	1395	154.341
mmu-miR-146b	MIMAT0003475	nmiR01070.1:1	Endogenous1	42	37	64.5032	32	118.686	43.8621	40	23	33	53	100	54	98	104	43.8621	59.3429	66	39	120	40	36.1218	34	73	95	14	74	59.3429	85.1442	59.3429	52	57	20	31	51.6025	51.6025	81	60	28	64	8	81	38	46.4423	67	77	56.7628
mmu-miR-147	MIMAT0004857	nmiR01071.1:1	Endogenous1	7	6	8.99022	10	11.987	5.99348	12	8	4	8	15	9	22	22	16.4821	8.99022	14	9	23	6	16.4821	11	17	22	1	10	10.4886	8.99022	8.99022	5	10	10	9	11.987	7.49185	22	7	7	13	7	13	13	14.9837	8	7	13.4853
mmu-miR-148a	MIMAT0000516	nmiR01072.1:1	Endogenous1	992	641	263.248	581	280.798	31.5898	637	36	59	653	755	541	2007	1662	59.6696	77.2195	2381	1331	1424	502	73.7095	649	558	1396	53	2058	21.0599	154.439	59.6696	980	646	936	2191	42.1197	35.0998	1022	1121	522	1759	13	837	1322	45.6297	1038	654	38.6097
mmu-miR-148b	MIMAT0000580	nmiR01073.1:1	Endogenous1	109	78	32.2694	60	17.9275	14.342	43	15	13	86	136	85	224	169	71.7098	46.6114	187	92	191	60	25.0984	36	64	167	11	214	35.8549	53.7824	35.8549	82	52	90	144	35.8549	14.342	121	114	39	197	9	99	118	53.7824	116	107	35.8549
mmu-miR-149	MIMAT0000159	nmiR01074.1:1	Endogenous1	17	28	20.2764	21	6.75879	8.44848	20	10	12	20	42	19	51	78	18.5867	6.75879	54	35	51	32	18.5867	25	31	68	7	45	15.2073	13.5176	11.8279	33	14	27	42	20.2764	28.7248	45	42	12	44	11	35	28	15.2073	37	34	11.8279
mmu-miR-150	MIMAT0000160	nmiR01075.1:1	Endogenous1	252	149	235.649	192	365.876	142.63	163	27	41	322	246	616	528	560	111.623	117.825	533	354	386	120	217.045	175	207	379	23	555	167.435	229.448	130.227	236	165	271	461	130.227	198.441	340	302	200	336	10	205	323	111.623	301	335	130.227
mmu-miR-151-3p	MIMAT0000161	nmiR01076.1:1	Endogenous1	44	24	39.0797	21	26.0532	9.76993	17	19	5	48	54	38	105	107	26.0532	26.0532	76	65	96	25	35.8231	11	31	65	6	97	42.3364	45.593	29.3098	44	28	35	64	45.593	19.5399	68	51	20	75	11	51	67	13.0266	41	64	32.5664
mmu-miR-151-5p	MIMAT0004536	nmiR01077.1:1	Endogenous1	553	338	161.514	177	84.2682	35.1117	238	27	19	515	522	633	921	1035	84.2682	49.1564	1301	868	932	260	84.2682	148	352	711	34	1294	63.2011	231.737	77.2458	657	477	595	1201	63.2011	63.2011	821	736	261	868	4	553	887	84.2682	590	631	70.2235
mmu-miR-152	MIMAT0000162	nmiR01078.1:1	Endogenous1	552	242	118.07	88	258.278	81.173	124	21	21	503	378	349	1071	911	103.311	110.69	936	482	795	211	110.69	59	310	805	37	1102	88.5524	118.07	73.7936	579	444	381	912	110.69	51.6556	1117	482	149	680	9	576	867	66.4143	409	952	59.0349
mmu-miR-153	MIMAT0000163	nmiR01079.2:2	Endogenous1	8	9	4.64835	1	4.64835	2.32418	5	3	2	2	24	4	9	12	2.32418	4.64835	7	3	13	7	4.64835	2	3	7	3	12	6.97253	9.2967	11.6209	3	1	6	5	6.97253	11.6209	7	7	4	5	2	11	4	4.64835	13	9	2.32418
mmu-miR-154	MIMAT0000164	nmiR01080.1:1	Endogenous1	145	79	60.8473	80	152.118	43.4624	87	12	23	169	132	180	387	383	73.886	60.8473	275	141	250	70	43.4624	49	111	233	18	331	43.4624	73.886	86.9247	176	144	109	259	56.5011	78.2322	240	202	77	251	9	154	216	65.1935	197	189	60.8473
mmu-miR-155	MIMAT0000165	nmiR01081.1:1	Endogenous1	1	1	13.8462	1	13.8462	13.8462	1	1	1	1	1	1	1	1	13.8462	13.8462	1	1	1	1	13.8462	1	1	1	1	1	13.8462	13.8462	13.8462	1	81	1	1	13.8462	13.8462	346	1	1	1	1	1	1	13.8462	133	228	13.8462
mmu-miR-15a	MIMAT0000526	nmiR01082.1:1	Endogenous1	987	421	472.548	830	173.268	35.4411	644	105	80	891	872	626	1957	1928	51.1927	126.013	1999	1177	1518	419	55.1306	652	752	1566	73	2220	98.4476	303.219	55.1306	1017	649	1538	2399	74.8202	66.9444	1756	1114	672	1743	13	1134	1640	63.0065	1160	1787	63.0065
mmu-miR-15b	MIMAT0000124	nmiR01083.1:1	Endogenous1	1373	577	188.66	729	163.917	55.6701	692	60	61	1023	914	521	2145	1970	61.8557	108.247	2058	1314	1773	424	86.5979	472	778	1527	86	2252	49.4845	176.289	58.7629	1142	780	1089	2019	61.8557	86.5979	2060	1310	556	2573	12	1081	1596	98.969	1300	1594	77.3196
mmu-miR-16	MIMAT0000527	nmiR01084.1:1	Endogenous1	8004	3441	421.152	1056	2708.59	57.8052	1565	60	69	5175	2978	3214	14434	14184	107.352	181.673	11000	5850	11057	2789	247.737	356	3612	8767	390	13388	82.5788	734.952	371.605	6717	5394	3402	8321	132.126	99.0946	8579	8264	1240	8590	18	5861	9964	107.352	4732	5972	57.8052
mmu-miR-181a	MIMAT0000210	nmiR01085.1:1	Endogenous1	2304	1154	956.68	1504	859.06	19.5241	1346	74	70	1903	1522	1435	3707	4240	58.5723	151.312	3657	2614	2933	793	73.2153	1149	1236	2307	168	3894	87.8584	458.816	185.479	1961	1397	2008	4342	112.263	68.3343	4146	2353	1245	4239	11	1696	2932	78.0963	2172	2959	68.3343
mmu-miR-181b+mmu-miR-181d	MIMAT0000673	nmiR01086.1:1	Endogenous1	27	23	16.0645	16	26.7741	21.4193	21	17	10	26	40	10	68	53	17.8494	30.344	39	14	61	29	23.2042	13	24	52	7	32	30.344	26.7741	12.4946	28	17	19	29	23.2042	23.2042	60	35	12	39	12	31	25	23.2042	29	21	32.1289
mmu-miR-181c	MIMAT0000674	nmiR01087.1:1	Endogenous1	79	63	110.451	44	123.446	81.2142	63	22	30	90	108	96	194	204	38.9828	68.2199	162	104	166	51	84.4628	39	105	139	15	173	97.457	107.203	97.457	81	57	51	93	90.9599	84.4628	146	102	34	139	21	83	97	77.9656	114	134	84.4628
mmu-miR-182	MIMAT0000211	nmiR01088.1:1	Endogenous1	20	12	9.68585	10	25.1832	7.74868	8	7	11	13	17	16	46	42	17.4345	11.623	22	14	26	10	13.5602	6	19	27	4	25	21.3089	17.4345	15.4974	10	12	9	5	23.2461	7.74868	23	15	8	9	7	28	14	7.74868	13	22	19.3717
mmu-miR-183	MIMAT0000212	nmiR01089.1:1	Endogenous1	64	42	37.9359	27	32.8778	12.6453	40	5	9	53	54	37	121	131	17.7034	30.3487	53	39	86	31	30.3487	11	30	78	2	86	17.7034	32.8778	22.7616	48	18	34	58	15.1744	20.2325	86	57	14	56	12	48	54	22.7616	39	67	22.7616
mmu-miR-1839-3p	MIMAT0009457	nmiR01090.1:1	Endogenous1	29	35	27.7574	8	58.9845	13.8787	18	5	6	24	228	31	46	48	13.8787	38.1664	34	22	77	57	24.2877	13	11	48	3	33	17.3484	41.6361	20.8181	43	27	15	13	24.2877	41.6361	48	30	12	14	3	31	24	31.2271	35	35	24.2877
mmu-miR-1839-5p	MIMAT0009456	nmiR01091.1:1	Endogenous1	52	48	76.5695	43	50.0646	55.9546	45	17	14	47	226	60	143	147	58.8996	58.8996	121	83	99	48	32.3948	35	58	134	15	111	41.2297	50.0646	61.8446	58	67	54	117	76.5695	50.0646	114	91	40	93	11	75	93	29.4498	103	129	53.0096
mmu-miR-184	MIMAT0000213	nmiR01092.2:2	Endogenous1	8	9	11.3145	9	7.54298	2.51433	8	2	7	6	21	6	13	8	8.80015	6.28582	8	11	18	10	10.0573	3	8	12	1	8	8.80015	7.54298	6.28582	6	3	6	9	10.0573	11.3145	11	15	7	1	9	8	4	7.54298	6	8	8.80015
mmu-miR-185	MIMAT0000214	nmiR01093.1:1	Endogenous1	99	75	88.7609	30	96.5927	65.2653	38	17	42	64	93	71	254	209	62.6547	60.0441	178	102	171	68	60.0441	29	97	153	10	151	62.6547	88.7609	91.3715	91	92	49	113	75.7078	73.0972	111	97	31	138	12	86	97	86.1502	92	84	65.2653
mmu-miR-186	MIMAT0000215	nmiR01094.1:1	Endogenous1	16	26	46.1915	33	35.9267	34.6436	40	17	27	26	41	36	71	74	32.0774	35.9267	26	16	48	26	50.0408	31	86	53	14	17	39.776	33.3605	39.776	29	17	21	12	47.4746	38.4929	42	16	23	23	15	44	12	44.9084	23	32	41.0591
mmu-miR-187	MIMAT0000216	nmiR01095.1:1	Endogenous1	45	47	54.9147	33	116.419	28.5556	43	17	26	89	76	49	59	84	37.342	28.5556	64	46	74	91	63.701	28	73	62	13	33	70.2908	57.1113	32.9488	84	59	26	26	54.9147	32.9488	92	49	24	56	14	63	36	41.7352	63	65	35.1454
mmu-miR-188-3p	MIMAT0004541	nmiR01096.1:1	Endogenous1	195	83	47.7242	79	85.9035	23.8621	84	7	10	201	125	143	332	357	66.8138	38.1793	285	123	260	76	28.6345	29	83	218	12	264	47.7242	100.221	47.7242	143	128	114	229	42.9518	38.1793	269	182	77	275	9	143	208	57.269	170	237	42.9518
mmu-miR-188-5p	MIMAT0000217	nmiR01097.1:1	Endogenous1	8	10	11.5834	9	10.1354	5.79168	9	5	7	19	10	8	19	27	11.5834	5.79168	10	4	22	15	14.4792	9	14	19	2	4	17.375	17.375	14.4792	11	8	4	13	14.4792	10.1354	11	10	3	8	3	8	10	18.823	10	10	11.5834
mmu-miR-1892	MIMAT0007871	nmiR01098.1:1	Endogenous1	1	5	8.21087	5	16.4217	1.36848	4	5	3	3	12	8	4	5	12.3163	8.21087	1	3	9	5	5.47391	6	9	15	1	5	8.21087	8.21087	5.47391	17	7	4	9	8.21087	9.57935	7	8	10	1	3	14	1	10.9478	6	2	6.84239
mmu-miR-1893	MIMAT0007879	nmiR01099.1:1	Endogenous1	5	13	27.8935	13	32.5424	20.9201	27	12	28	15	48	20	40	57	11.6223	24.4068	21	15	37	17	30.218	24	40	38	14	15	23.2446	29.0557	29.0557	31	19	12	14	23.2446	25.5691	13	18	20	27	14	16	10	36.0291	18	22	23.2446
mmu-miR-1894-3p	MIMAT0007878	nmiR01100.1:1	Endogenous1	9	7	11.5836	10	8.68767	7.23973	13	7	2	8	11	11	17	17	5.79178	13.0315	15	12	19	8	2.89589	14	13	28	3	16	10.1356	7.23973	8.68767	7	5	12	13	7.23973	10.1356	15	12	6	15	6	11	3	4.34384	4	10	20.2712
mmu-miR-1894-5p	MIMAT0007877	nmiR01101.1:1	Endogenous1	5	16	6.4526	8	12.9052	6.4526	6	8	7	6	16	13	14	18	8.06575	11.2921	10	12	16	9	11.2921	7	7	11	2	10	8.06575	19.3578	9.6789	13	4	9	12	8.06575	8.06575	15	13	6	8	6	13	11	4.83945	9	16	16.1315
mmu-miR-1895	MIMAT0007867	nmiR01102.1:1	Endogenous1	12	12	23.276	16	37.9767	13.4756	21	18	18	12	34	23	44	46	22.051	26.9512	18	10	36	12	33.0764	12	47	39	8	12	17.1507	30.6263	24.5011	26	11	10	6	23.276	25.7261	26	17	24	11	15	28	9	17.1507	17	19	19.6009
mmu-miR-1896	MIMAT0007873	nmiR01103.1:1	Endogenous1	128	42	73.9811	51	61.6509	28.7704	60	14	9	140	66	126	244	277	53.4308	57.5409	173	113	192	57	57.5409	28	86	169	7	181	45.2107	61.6509	41.1006	113	85	76	185	45.2107	49.3207	190	122	65	208	11	121	144	69.8711	116	184	32.8805
mmu-miR-1897-3p	MIMAT0007865	nmiR01104.1:1	Endogenous1	3	8	8.25636	12	12.3845	2.75212	8	8	8	6	7	8	12	21	5.50424	6.8803	9	4	14	9	5.50424	7	14	23	4	20	6.8803	8.25636	9.63242	5	5	3	6	13.7606	17.8888	6	6	5	9	2	14	5	6.8803	7	4	8.25636
mmu-miR-1898	MIMAT0007875	nmiR01106.1:1	Endogenous1	5	6	23.6849	17	9.2108	17.1058	14	13	11	13	20	11	23	21	15.7899	11.8425	9	13	13	17	32.8957	9	32	28	4	7	10.5266	15.7899	10.5266	17	5	16	4	19.7374	15.7899	24	12	10	10	8	14	7	18.4216	13	19	13.1583
mmu-miR-1899	MIMAT0007869	nmiR01107.1:1	Endogenous1	4	6	4.66936	12	12.4516	7.78227	9	8	2	6	11	10	12	19	12.4516	6.22581	9	9	10	11	10.8952	8	11	16	1	9	10.8952	21.7904	7.78227	14	2	9	4	4.66936	17.121	13	5	6	2	8	14	6	4.66936	13	9	1.55645
mmu-miR-18a	MIMAT0000528	nmiR01108.1:1	Endogenous1	37	21	9.49855	21	14.2478	7.12391	12	6	4	29	14	12	55	57	16.6225	11.8732	35	21	37	21	7.12391	2	20	35	3	49	9.49855	9.49855	9.49855	28	13	8	16	11.8732	9.49855	72	22	11	22	1	31	30	11.8732	36	39	18.9971
mmu-miR-18b	MIMAT0004858	nmiR01109.1:1	Endogenous1	12	9	17.2844	8	6.28525	10.9992	17	12	7	7	17	15	29	27	7.85656	9.42787	18	7	21	12	7.85656	9	23	21	7	8	15.7131	14.1418	17.2844	8	8	13	10	18.8557	10.9992	24	14	6	16	9	18	9	9.42787	7	15	17.2844
mmu-miR-190	MIMAT0000220	nmiR01110.1:1	Endogenous1	15	22	24.0144	12	25.8617	36.9452	14	13	15	21	167	17	54	54	20.3199	16.6254	32	19	41	34	14.7781	23	43	44	8	37	11.0836	24.0144	24.0144	28	12	21	31	29.5562	36.9452	27	33	16	27	16	38	20	31.4034	16	23	31.4034
mmu-miR-1900	MIMAT0007870	nmiR01111.1:1	Endogenous1	60	47	33.5654	58	43.635	3.35654	45	9	14	77	53	62	141	161	40.2785	26.8523	94	46	105	37	23.4958	26	46	89	4	113	43.635	40.2785	36.922	52	50	37	89	40.2785	36.922	111	83	33	98	15	70	84	30.2089	66	82	43.635
mmu-miR-1901	MIMAT0007880	nmiR01112.1:1	Endogenous1	2	9	25.1786	13	16.0227	11.4448	22	13	20	13	26	13	26	37	18.3117	20.6006	17	7	19	11	12.5893	19	23	21	6	7	10.3003	16.0227	16.0227	16	4	6	6	17.1672	27.4675	20	10	16	13	9	19	10	9.15584	10	22	17.1672
mmu-miR-1902	MIMAT0007863	nmiR01113.1:1	Endogenous1	63	19	24.6909	20	32.9212	37.0363	14	7	4	32	27	68	69	55	28.806	28.806	46	23	70	29	37.0363	7	17	25	4	24	28.806	37.0363	41.1514	33	15	11	22	32.9212	8.23029	99	60	12	117	8	24	19	20.5757	55	72	45.2666
mmu-miR-1903	MIMAT0007868	nmiR01114.1:1	Endogenous1	4	15	8.43777	12	7.03147	8.43777	11	10	5	8	23	6	20	13	5.62518	12.6567	16	8	16	12	8.43777	12	6	17	2	11	5.62518	8.43777	9.84406	10	7	13	20	7.03147	12.6567	9	9	9	15	6	23	9	5.62518	10	10	5.62518
mmu-miR-1904	MIMAT0007874	nmiR01115.1:1	Endogenous1	19	15	28.6212	23	36.427	36.427	25	26	28	30	34	26	54	60	22.1164	33.825	28	10	50	29	35.126	29	69	40	12	15	20.8154	39.0289	24.7183	25	17	18	15	29.9222	31.2231	36	39	16	17	17	39	15	28.6212	24	36	24.7183
mmu-miR-1905	MIMAT0007866	nmiR01116.1:1	Endogenous1	3	6	8.00414	3	6.40331	4.80249	6	3	5	5	17	12	16	21	4.80249	8.00414	8	2	11	5	6.40331	5	4	12	1	6	1.60083	12.8066	4.80249	7	2	2	4	11.2058	6.40331	6	11	6	6	1	11	8	3.20166	4	4	4.80249
mmu-miR-1906	MIMAT0007872	nmiR01117.1:1	Endogenous1	15	24	36.5826	35	49.5635	37.7627	38	28	41	22	59	22	57	71	35.4025	28.322	33	16	55	33	36.5826	40	93	50	21	10	36.5826	35.4025	44.8432	39	14	19	13	46.0233	38.9428	45	31	28	32	18	32	16	41.3029	45	35	38.9428
mmu-miR-1907	MIMAT0007876	nmiR01118.1:1	Endogenous1	10	11	7.89033	11	13.1505	14.4656	17	14	14	11	24	15	33	32	15.7807	10.5204	16	10	23	17	19.7258	13	23	22	3	12	14.4656	21.0409	17.0957	16	8	9	11	13.1505	19.7258	13	17	9	10	8	18	7	15.7807	13	14	13.1505
mmu-miR-190b	MIMAT0004852	nmiR01119.1:1	Endogenous1	139	60	16.0294	51	58.7745	26.7157	55	7	5	99	86	120	239	241	32.0588	21.3726	144	73	137	41	26.7157	18	47	157	12	244	26.7157	64.1177	16.0294	83	67	69	142	32.0588	26.7157	161	127	44	160	4	120	134	21.3726	106	122	26.7157
mmu-miR-191	MIMAT0000221	nmiR01120.1:1	Endogenous1	119	59	39.3784	35	147.669	29.5338	47	18	12	106	90	105	214	178	49.223	83.6791	196	98	159	53	24.6115	30	64	133	7	221	39.3784	49.223	24.6115	85	59	74	155	83.6791	44.3007	113	92	33	114	9	110	128	34.4561	82	132	39.3784
mmu-miR-192	MIMAT0000517	nmiR01121.1:1	Endogenous1	23	13	18.8261	8	13.4472	5.37887	13	3	6	17	31	26	43	34	21.5155	10.7577	27	12	28	13	10.7577	4	13	19	2	26	16.1366	29.5838	21.5155	20	12	14	15	34.9627	13.4472	30	18	10	13	7	32	13	16.1366	17	29	24.2049
mmu-miR-1927	MIMAT0009390	nmiR01122.1:1	Endogenous1	28	27	34.594	14	32.4319	30.2697	19	14	7	34	40	28	53	73	19.4591	23.7834	35	17	36	22	28.1076	13	21	53	5	31	19.4591	15.1349	15.1349	26	18	18	31	21.6212	30.2697	37	44	21	30	11	32	19	17.297	21	32	25.9455
mmu-miR-1928	MIMAT0009391	nmiR01123.1:1	Endogenous1	29	20	19.659	9	23.5908	11.7954	26	10	6	16	34	28	48	34	13.7613	29.4885	31	21	32	25	11.7954	12	18	29	4	16	9.8295	23.5908	23.5908	16	11	13	17	19.659	17.6931	34	17	10	14	13	26	12	19.659	18	24	25.5567
mmu-miR-1929	MIMAT0009392	nmiR01124.1:1	Endogenous1	37	59	71.495	27	117.757	58.8783	43	21	30	39	263	46	89	102	63.0839	48.3643	67	41	109	99	54.6727	27	75	94	12	59	39.9531	67.2895	58.8783	72	40	26	22	46.2615	48.3643	107	53	32	45	13	69	25	54.6727	68	52	52.5699
mmu-miR-193	MIMAT0000223	nmiR01125.1:1	Endogenous1	82	66	61.0932	11	104.731	17.4552	14	16	11	29	48	56	121	99	17.4552	39.2742	120	37	119	28	52.3656	12	31	67	5	123	39.2742	39.2742	52.3656	43	27	25	40	39.2742	21.819	111	30	16	30	9	60	44	17.4552	52	79	30.5466
mmu-miR-1930	MIMAT0009393	nmiR01126.1:1	Endogenous1	4	9	14.9149	10	8.28608	8.28608	15	7	8	13	18	8	23	29	18.2294	11.6005	19	12	19	13	11.6005	8	18	28	1	9	6.62886	14.9149	18.2294	17	7	18	11	18.2294	16.5722	25	15	10	8	6	9	8	14.9149	19	22	16.5722
mmu-miR-1931	MIMAT0009394	nmiR01127.1:1	Endogenous1	10	10	10.5838	2	7.55988	3.02395	4	3	2	12	13	11	21	18	7.55988	7.55988	21	12	16	9	9.07186	11	9	20	1	12	9.07186	16.6317	15.1198	10	8	12	11	9.07186	7.55988	10	4	5	10	6	18	5	16.6317	5	10	12.0958
mmu-miR-1932	MIMAT0009395	nmiR01128.1:1	Endogenous1	4	2	2.93436	6	7.33589	7.33589	8	5	4	8	9	4	15	17	8.80307	8.80307	10	3	11	9	7.33589	4	8	11	1	9	10.2703	13.2046	4.40154	2	3	3	3	2.93436	8.80307	7	2	3	4	7	12	4	5.86872	8	8	1.46718
mmu-miR-1933-3p	MIMAT0009397	nmiR01129.1:1	Endogenous1	9	9	10.7613	14	17.2181	6.45679	5	5	6	11	19	13	27	33	15.0658	15.0658	18	17	18	8	19.3704	8	16	33	1	20	12.9136	15.0658	15.0658	22	14	12	20	19.3704	15.0658	20	19	7	19	8	16	20	12.9136	14	17	17.2181
mmu-miR-1933-5p	MIMAT0009396	nmiR01130.1:1	Endogenous1	23	25	46.6153	18	46.6153	62.1537	18	4	10	37	144	38	94	148	31.0769	44.0256	28	21	38	32	38.8461	19	76	113	15	23	15.5384	44.0256	23.3076	22	16	29	17	25.8974	25.8974	40	33	15	31	13	106	29	36.2563	33	36	44.0256
mmu-miR-1934	MIMAT0009398	nmiR01131.1:1	Endogenous1	10	5	10.1937	9	3.82263	6.37104	7	6	7	4	8	6	11	19	8.91946	2.54842	15	6	11	7	1.27421	13	12	14	3	12	10.1937	15.2905	8.91946	7	6	7	6	8.91946	8.91946	6	4	4	8	5	9	7	7.64525	10	4	8.91946
mmu-miR-1935	MIMAT0009399	nmiR01132.1:1	Endogenous1	235	81	47.8452	59	116.955	58.4775	68	13	5	258	112	177	303	476	37.2129	53.1613	168	102	235	73	47.8452	31	106	204	15	185	63.7936	79.742	37.2129	100	122	39	121	63.7936	31.8968	237	143	43	239	12	166	159	26.5807	101	196	42.5291
mmu-miR-1936	MIMAT0009400	nmiR01133.1:1	Endogenous1	8	3	6.99394	7	8.74243	1.74849	7	6	4	5	14	9	12	17	6.99394	3.49697	6	3	14	6	5.24546	11	4	11	2	5	10.4909	12.2394	6.99394	7	2	7	6	12.2394	12.2394	6	8	1	9	2	12	8	1.74849	5	3	8.74243
mmu-miR-1937a+mmu-miR-1937b	MIMAT0009401	nmiR01134.1:1	Endogenous1	7172	1763	367.002	1376	4681.51	53.7076	1244	11	13	10637	2696	5968	9128	16576	26.8538	44.7564	2557	1271	5714	1684	89.5127	229	2060	6322	233	3634	80.5614	921.981	134.269	2977	3519	416	2628	53.7076	80.5614	6423	4995	879	6034	10	4477	4051	44.7564	2820	5003	53.7076
mmu-miR-1937c	MIMAT0009429	nmiR01135.1:1	Endogenous1	2571	789	102.072	412	1811.77	63.7948	416	13	17	3044	1669	2985	3079	5820	63.7948	102.072	1615	717	3089	761	51.0359	103	910	3007	64	3101	76.5538	535.877	102.072	1186	1568	304	1078	127.59	63.7948	1971	1632	258	1889	8	2337	1758	25.5179	601	1352	76.5538
mmu-miR-1938	MIMAT0009402	nmiR01136.1:1	Endogenous1	17	11	12.4198	17	15.1798	5.51992	11	6	4	14	19	14	22	26	12.4198	8.27988	12	9	8	15	19.3197	7	21	30	2	9	15.1798	20.6997	17.9397	13	7	12	11	13.7998	13.7998	12	10	9	11	8	17	3	15.1798	5	10	19.3197
mmu-miR-1939	MIMAT0009403	nmiR01137.1:1	Endogenous1	10	9	13.1767	13	11.7127	7.32041	6	10	8	7	17	4	31	27	19.0331	17.569	16	11	23	13	10.2486	8	13	17	5	11	7.32041	29.2816	10.2486	11	5	9	7	13.1767	13.1767	11	8	7	8	4	15	9	5.85633	7	12	8.78449
mmu-miR-193b	MIMAT0004859	nmiR01138.1:1	Endogenous1	110	42	38.1761	42	67.8685	12.7254	36	8	7	129	76	97	185	218	33.9343	29.6925	95	55	134	39	59.385	24	52	128	2	121	25.4507	42.4178	29.6925	69	65	39	90	42.4178	29.6925	131	86	28	124	10	77	92	42.4178	86	132	33.9343
mmu-miR-194	MIMAT0000224	nmiR01139.1:1	Endogenous1	52	30	26.4956	12	58.2903	21.1965	10	4	8	39	37	39	76	60	10.5982	31.7947	67	31	64	27	15.8974	12	17	52	1	64	5.29912	21.1965	10.5982	31	31	19	22	31.7947	26.4956	89	39	11	19	7	32	47	21.1965	23	67	15.8974
mmu-miR-1940	MIMAT0009404	nmiR01140.1:1	Endogenous1	22	16	28.6356	27	28.6356	10.0225	23	9	13	16	26	13	40	32	21.4767	18.6131	30	25	42	15	17.1814	11	19	28	1	18	11.4542	27.2038	17.1814	20	10	15	28	22.9085	11.4542	28	28	13	20	15	28	18	11.4542	17	26	15.7496
mmu-miR-1941-3p	MIMAT0009406	nmiR01141.1:1	Endogenous1	17	16	20.4684	16	25.5855	11.9399	16	2	10	16	29	21	34	29	17.057	23.8798	18	18	18	14	15.3513	10	18	25	4	25	15.3513	32.4083	15.3513	8	13	14	18	18.7627	22.1741	38	10	9	10	11	23	18	17.057	22	21	18.7627
mmu-miR-1941-5p	MIMAT0009405	nmiR01142.1:1	Endogenous1	3	9	1.63553	7	9.81319	3.27106	5	4	5	4	8	7	8	10	4.90659	6.54212	6	5	3	7	1.63553	3	6	8	3	4	6.54212	4.90659	4.90659	1	5	1	3	4.90659	3.27106	7	6	3	9	1	7	3	4.90659	4	7	11.4487
mmu-miR-1942	MIMAT0009407	nmiR01143.1:1	Endogenous1	30	52	38.1675	39	58.2556	66.2909	42	17	26	44	414	39	126	105	72.3173	80.3526	49	28	68	51	30.1322	42	90	125	11	44	38.1675	56.2468	44.1939	28	33	40	41	42.1851	46.2027	42	21	29	34	33	98	39	48.2116	42	43	42.1851
mmu-miR-1943	MIMAT0009408	nmiR01144.1:1	Endogenous1	15	15	39.2825	25	51.4736	27.0914	30	23	23	23	36	28	50	68	16.2548	21.6731	31	29	54	41	33.8642	29	75	71	14	22	23.0277	37.9279	32.5096	30	28	17	17	35.2188	33.8642	43	25	28	29	10	34	10	43.3462	33	40	40.6371
mmu-miR-1944	MIMAT0009409	nmiR01145.1:1	Endogenous1	2275	1108	350.078	751	796.01	245.888	819	44	60	1513	1232	975	4212	4910	91.687	137.53	2446	1260	2553	615	141.698	533	989	2428	81	3690	129.195	304.234	120.86	1602	1776	829	1850	154.201	183.374	3477	1015	363	2093	14	1341	1835	133.363	1455	2500	133.363
mmu-miR-1945	MIMAT0009410	nmiR01146.1:1	Endogenous1	14	15	37.9	23	37.9	32.6724	31	14	32	26	48	32	47	66	16.9897	26.138	27	16	36	30	24.8311	24	57	51	18	11	22.2173	35.2862	33.9793	25	24	13	12	26.138	27.4448	35	26	30	33	22	19	14	27.4448	22	22	28.7517
mmu-miR-1946a	MIMAT0009412	nmiR01147.1:1	Endogenous1	4	18	23.0513	18	16.6481	19.2094	18	15	19	21	30	23	37	39	29.4544	26.8931	17	16	32	20	28.1738	21	42	36	6	12	19.2094	30.735	15.3675	20	11	7	9	19.2094	23.0513	42	15	18	11	12	28	12	28.1738	22	20	29.4544
mmu-miR-1946b	MIMAT0009443	nmiR01148.1:1	Endogenous1	12	8	11.5247	13	11.5247	7.68316	7	8	5	15	12	10	23	18	7.68316	6.40264	16	16	21	14	15.3663	15	14	29	4	16	14.0858	15.3663	12.8053	9	7	7	8	16.6469	16.6469	20	8	6	10	10	20	11	20.4884	6	6	16.6469
mmu-miR-1947	MIMAT0009413	nmiR01149.1:1	Endogenous1	7	15	11.0921	7	9.24342	12.9408	7	4	6	12	13	9	23	21	12.9408	5.54605	10	4	14	6	12.9408	5	4	15	1	15	7.39473	5.54605	11.0921	7	3	9	9	5.54605	14.7895	10	9	3	12	2	16	6	12.9408	7	9	5.54605
mmu-miR-1948	MIMAT0009415	nmiR01150.1:1	Endogenous1	20	9	9.4387	11	16.5177	18.8774	13	9	5	28	23	21	38	55	23.5968	16.5177	18	12	31	11	14.1581	8	14	18	1	15	18.8774	16.5177	21.2371	17	10	10	18	4.71935	11.7984	26	24	8	26	7	20	15	7.07903	15	23	25.9564
mmu-miR-1949	MIMAT0009416	nmiR01151.1:1	Endogenous1	29	21	24.0823	18	22.6657	14.1661	25	8	8	37	113	14	51	61	5.66642	14.1661	23	14	32	16	11.3328	10	33	42	2	25	4.24982	11.3328	15.5827	29	12	10	18	15.5827	9.91624	53	23	20	105	9	34	14	8.49963	40	56	15.5827
mmu-miR-195	MIMAT0000225	nmiR01152.1:1	Endogenous1	145	41	71.7546	18	71.7546	35.8773	18	17	10	89	64	188	160	150	62.7853	116.601	111	65	195	47	107.632	12	33	139	3	194	71.7546	62.7853	71.7546	92	99	39	39	116.601	80.724	211	88	15	100	12	112	113	8.96933	90	174	62.7853
mmu-miR-1950	MIMAT0009417	nmiR01153.1:1	Endogenous1	4	4	5.30877	10	9.29035	11.9447	10	3	4	6	9	3	8	19	13.2719	9.29035	7	4	14	7	6.63597	6	11	12	1	2	7.96316	10.6175	9.29035	9	6	3	4	3.98158	10.6175	3	6	4	5	7	16	3	7.96316	6	6	3.98158
mmu-miR-1951	MIMAT0009422	nmiR01154.1:1	Endogenous1	202	78	81.5002	76	76.9725	40.7501	83	8	11	179	100	144	323	413	45.2779	49.8057	217	116	230	83	45.2779	43	90	235	14	257	40.7501	58.8613	49.8057	126	104	98	201	58.8613	27.1667	238	174	63	228	10	150	179	40.7501	127	208	31.6945
mmu-miR-1952	MIMAT0009423	nmiR01155.1:1	Endogenous1	12	13	6.99565	13	11.193	9.79392	16	8	7	12	13	8	17	22	15.3904	15.3904	11	8	24	10	9.79392	11	11	30	6	10	12.5922	8.39478	8.39478	14	11	7	8	18.1887	15.3904	8	14	3	11	12	18	8	6.99565	10	8	11.193
mmu-miR-1953	MIMAT0009424	nmiR01156.1:1	Endogenous1	29	45	33.5171	11	63.6826	10.0551	7	9	8	14	70	19	63	65	13.4069	30.1654	33	16	43	33	23.462	9	24	76	1	41	26.8137	46.924	20.1103	21	17	19	10	30.1654	23.462	42	20	6	10	5	63	13	16.7586	32	25	16.7586
mmu-miR-1954	MIMAT0009425	nmiR01157.1:1	Endogenous1	10	12	11.3487	7	12.7673	5.67436	7	6	10	10	21	8	22	29	9.93013	14.1859	11	8	22	8	8.51154	12	11	32	2	10	14.1859	4.25577	9.93013	14	4	14	9	12.7673	14.1859	18	13	9	6	4	23	9	8.51154	5	13	19.8603
mmu-miR-1955	MIMAT0009426	nmiR01158.1:1	Endogenous1	230	93	70.2951	74	90.3794	50.2108	82	5	8	260	158	199	388	445	45.1897	60.2529	248	133	286	94	35.1475	48	97	222	12	296	30.1265	65.274	40.1686	159	143	90	230	40.1686	70.2951	318	232	61	301	7	161	251	30.1265	172	280	30.1265
mmu-miR-1956	MIMAT0009428	nmiR01159.1:1	Endogenous1	14	24	19.5138	20	12.0085	18.0128	10	13	5	17	37	22	33	27	13.5096	16.5117	22	15	28	17	12.0085	11	21	22	4	10	12.0085	19.5138	18.0128	24	10	6	15	16.5117	21.0149	19	15	11	13	17	18	10	12.0085	18	17	18.0128
mmu-miR-1957	MIMAT0009430	nmiR01160.1:1	Endogenous1	9	15	22.7959	15	8.28943	12.4341	16	11	5	8	106	11	34	36	8.28943	14.5065	10	12	15	7	20.7236	12	24	52	9	16	12.4341	37.3024	16.5789	17	5	8	13	31.0854	14.5065	22	15	10	12	6	38	15	8.28943	12	12	24.8683
mmu-miR-1958	MIMAT0009431	nmiR01161.1:1	Endogenous1	12	19	9.55772	15	23.2116	16.3847	25	9	14	19	62	14	38	38	23.2116	21.8462	19	14	38	17	12.2885	14	19	24	6	14	17.7501	21.8462	16.3847	21	10	16	15	15.0193	17.7501	22	21	15	12	12	25	12	27.3078	24	13	25.9424
mmu-miR-1959	MIMAT0009432	nmiR01162.1:1	Endogenous1	12	16	20.0165	8	18.5868	8.5785	13	12	9	10	21	11	25	17	18.5868	7.14875	14	14	28	8	12.8678	10	14	23	2	12	12.8678	10.0083	11.438	19	11	6	17	12.8678	8.5785	23	13	10	5	8	11	10	14.2975	15	23	18.5868
mmu-miR-1960	MIMAT0009433	nmiR01163.1:1	Endogenous1	8	14	14.6996	10	29.3992	2.09994	7	6	5	8	16	15	22	23	4.19988	14.6996	9	7	17	17	2.09994	6	15	21	2	20	20.9994	8.39976	6.29982	9	4	12	11	2.09994	10.4997	19	8	6	7	6	16	11	6.29982	5	12	12.5996
mmu-miR-1961	MIMAT0009434	nmiR01164.1:1	Endogenous1	53	47	66.2065	46	52.1627	34.1064	45	20	20	62	113	61	85	115	36.1126	46.1439	73	45	73	45	52.1627	39	83	61	8	56	38.1189	72.2253	52.1627	58	33	27	38	48.1502	18.0563	84	55	37	47	16	49	45	46.1439	84	73	52.1627
mmu-miR-1962	MIMAT0009435	nmiR01165.1:1	Endogenous1	14	16	36.9342	32	34.472	30.7785	30	20	37	21	39	22	53	69	30.7785	22.1605	32	14	46	31	44.3211	22	58	46	14	15	34.472	20.9294	25.854	41	18	18	14	33.2408	28.3163	41	27	22	29	16	33	19	25.854	30	41	25.854
mmu-miR-1963	MIMAT0009436	nmiR01166.1:1	Endogenous1	17	34	46.8061	33	55.9073	29.9039	36	23	41	25	52	27	55	70	29.9039	39.0051	36	22	63	34	37.7049	25	108	57	22	23	39.0051	46.8061	44.2058	37	16	23	14	49.4065	49.4065	56	32	28	32	18	37	17	27.3036	31	36	26.0034
mmu-miR-1964	MIMAT0009437	nmiR01167.1:1	Endogenous1	11	17	31.8971	21	49.7595	28.0695	22	16	30	23	44	22	52	53	19.1383	38.2765	25	14	49	33	31.8971	16	52	58	8	16	33.173	28.0695	26.7936	36	18	10	9	25.5177	30.6212	32	19	21	18	17	29	9	29.3453	22	24	33.173
mmu-miR-1965	MIMAT0009438	nmiR01168.1:1	Endogenous1	94	37	63.3328	39	54.2853	54.2853	48	21	19	99	77	85	146	219	36.1902	60.317	91	69	115	45	57.3011	26	93	113	10	118	51.2694	78.4121	78.4121	74	65	37	81	69.3645	48.2536	120	76	41	126	10	89	87	42.2219	76	100	75.3962
mmu-miR-1966	MIMAT0009439	nmiR01169.1:1	Endogenous1	68	34	48.6047	30	48.6047	27.7741	43	34	32	71	60	56	113	143	39.3467	46.2902	62	44	84	45	57.8628	29	78	77	16	74	43.9757	50.9193	60.1773	62	53	26	48	57.8628	53.2338	75	47	29	83	8	50	42	55.5483	52	83	46.2902
mmu-miR-1967	MIMAT0009440	nmiR01170.1:1	Endogenous1	19	18	39.2848	32	41.7401	33.1466	34	27	47	33	60	27	65	72	25.7807	49.106	29	21	64	39	51.5613	27	70	51	17	15	42.9678	34.3742	46.6507	37	27	21	12	40.5125	42.9678	37	28	36	20	22	34	15	51.5613	39	38	28.236
mmu-miR-1968	MIMAT0009441	nmiR01171.1:1	Endogenous1	20	14	12.2949	20	21.077	10.5385	26	8	12	21	22	20	43	42	21.077	8.7821	16	20	35	21	21.077	19	28	44	5	22	21.077	26.3463	19.3206	21	11	14	16	26.3463	24.5899	30	18	8	18	7	23	14	28.1027	21	27	22.8335
mmu-miR-1969	MIMAT0009442	nmiR01172.1:1	Endogenous1	9	4	11.5195	13	7.19971	4.31983	12	3	4	7	25	16	13	22	12.9595	8.63966	8	9	19	15	7.19971	5	8	24	2	6	15.8394	15.8394	11.5195	12	4	14	13	7.19971	7.19971	10	8	7	8	6	11	7	11.5195	5	6	10.0796
mmu-miR-196a	MIMAT0000518	nmiR01173.1:1	Endogenous1	52	16	18.355	18	15.7329	7.86644	12	6	8	34	43	30	39	34	15.7329	18.355	25	13	23	17	15.7329	5	24	24	6	20	15.7329	41.9544	28.8436	26	22	17	26	15.7329	13.1107	61	16	9	53	4	26	19	26.2215	62	50	10.4886
mmu-miR-196b	MIMAT0001081	nmiR01174.1:1	Endogenous1	19	14	15.8303	13	11.0812	11.0812	19	12	7	20	17	23	34	26	14.2472	18.9963	21	17	31	18	15.8303	6	18	36	7	9	12.6642	11.0812	15.8303	18	16	12	12	7.91513	18.9963	39	20	10	48	8	15	10	14.2472	30	25	15.8303
mmu-miR-1970	MIMAT0009444	nmiR01175.1:1	Endogenous1	9	7	11.262	11	19.7085	7.03874	12	7	3	10	9	15	14	22	7.03874	12.6697	15	10	13	9	9.85424	9	21	15	3	7	11.262	14.0775	11.262	17	6	5	16	15.4852	7.03874	17	15	7	6	12	20	9	12.6697	8	11	14.0775
mmu-miR-1971	MIMAT0009446	nmiR01176.1:1	Endogenous1	11	6	8.84125	10	5.89416	13.2619	7	5	8	8	17	8	26	18	11.7883	7.3677	8	6	15	11	11.7883	12	13	25	4	6	7.3677	8.84125	10.3148	7	7	7	4	13.2619	7.3677	10	5	4	11	11	17	9	16.2089	15	10	14.7354
mmu-miR-1981	MIMAT0009458	nmiR01177.1:1	Endogenous1	219	96	60.4062	89	120.812	30.2031	90	17	12	250	125	187	371	444	65.44	55.3723	306	160	305	87	45.3046	48	103	250	13	352	65.44	85.5754	45.3046	180	146	114	241	45.3046	35.2369	336	238	98	329	8	189	247	45.3046	160	281	45.3046
mmu-miR-1982	MIMAT0009460	nmiR01178.1:1	Endogenous1	13	9	11.2315	8	13.4778	8.98517	9	8	6	15	16	21	26	41	8.98517	11.2315	12	9	18	10	13.4778	6	9	24	4	9	11.2315	6.73888	15.7241	14	7	8	11	4.49259	11.2315	17	11	7	8	7	21	12	13.4778	8	11	15.7241
mmu-miR-1983	MIMAT0009455	nmiR01179.1:1	Endogenous1	34	20	9.56791	49	11.6941	3.1893	36	9	5	32	29	10	71	71	7.44171	5.31551	43	43	43	7	6.37861	16	17	35	3	30	8.50481	4.2524	7.44171	21	7	14	33	11.6941	5.31551	33	16	12	23	7	20	15	6.37861	17	15	6.37861
mmu-miR-199a-3p	MIMAT0000230	nmiR01180.1:1	Endogenous1	2034	1469	553.837	1528	231.35	21.0318	1715	93	88	1830	2217	786	5710	4426	56.0848	157.738	4249	2775	2732	885	35.053	1168	1114	2651	139	3326	45.5689	318.982	70.106	1920	1567	1670	3917	38.5583	49.0742	3260	1943	1148	2656	8	1349	2409	56.0848	2683	3276	45.5689
mmu-miR-199a-5p	MIMAT0000229	nmiR01181.1:1	Endogenous1	3442	1484	178.607	360	270.791	57.6151	545	31	39	2219	1168	551	5817	5712	63.3766	97.9457	2872	1401	3478	853	63.3766	171	787	2774	72	3753	63.3766	224.699	57.6151	1341	1355	495	1440	80.6611	69.1381	2955	1484	243	2010	7	1489	1850	51.8536	999	2223	86.4226
mmu-miR-19a	MIMAT0000651	nmiR01182.2:2	Endogenous1	770	509	46.7999	137	29.5578	22.1684	172	29	28	496	394	221	1697	1240	29.5578	29.5578	1691	688	1103	370	32.021	70	297	889	31	1273	22.1684	59.1157	29.5578	570	554	288	671	24.6315	27.0947	1474	758	75	1025	15	449	578	29.5578	737	980	27.0947
mmu-miR-19b	MIMAT0000513	nmiR01183.1:1	Endogenous1	540	241	77.6427	68	67.9374	43.674	62	69	56	321	316	225	917	877	97.0534	184.401	929	362	746	188	82.4954	38	170	656	12	1415	67.9374	111.611	82.4954	327	275	247	389	82.4954	87.3481	692	286	41	402	15	411	438	101.906	236	502	77.6427
mmu-miR-200a	MIMAT0000519	nmiR01184.1:1	Endogenous1	679	238	111.976	71	120.589	43.0675	110	9	5	553	212	505	1207	1169	51.681	94.7486	585	256	745	172	77.5216	24	217	628	23	825	111.976	198.111	94.7486	300	267	160	349	111.976	86.1351	710	503	80	622	6	352	526	25.8405	239	573	43.0675
mmu-miR-200b	MIMAT0000233	nmiR01185.1:1	Endogenous1	937	543	534.904	259	521.419	166.315	399	50	42	759	644	612	2191	1967	143.84	148.335	1281	922	1096	354	112.375	201	412	962	44	1267	85.4048	534.904	260.709	769	644	468	1128	197.779	80.9098	1342	891	273	896	19	523	919	94.3947	598	1123	256.214
mmu-miR-200c	MIMAT0000657	nmiR01186.1:1	Endogenous1	694	305	79.1369	281	71.2232	19.7842	316	21	26	486	487	385	1109	1181	19.7842	43.5253	731	377	817	192	35.6116	116	339	541	29	1003	15.8274	71.2232	63.3095	365	226	337	742	35.6116	43.5253	572	470	157	660	8	357	744	23.7411	307	467	23.7411
mmu-miR-201	MIMAT0000234	nmiR01187.1:1	Endogenous1	11	20	20.398	13	17.2598	21.9671	19	11	3	12	87	17	44	32	25.1052	14.1217	28	8	25	18	9.41445	19	24	35	2	20	17.2598	36.0887	7.84538	17	13	9	17	20.398	17.2598	34	13	16	20	12	44	12	15.6908	18	21	21.9671
mmu-miR-202-3p	MIMAT0000235	nmiR01188.1:1	Endogenous1	16	19	24.1357	15	16.0904	16.0904	19	10	8	19	35	15	38	30	12.8724	11.2633	25	15	36	20	17.6995	20	16	28	4	20	16.0904	27.3538	9.65427	26	15	17	16	14.4814	17.6995	29	19	6	17	8	26	15	11.2633	6	33	20.9176
mmu-miR-202-5p	MIMAT0004546	nmiR01189.1:1	Endogenous1	61	84	99.8631	56	69.47	82.4956	75	37	38	63	121	67	116	117	75.2592	75.2592	81	56	96	57	50.6552	77	92	124	15	66	43.4187	107.1	53.5498	75	51	50	85	65.1281	62.2335	79	72	62	64	24	98	68	60.7862	110	85	92.6267
mmu-miR-203	MIMAT0000236	nmiR01190.1:1	Endogenous1	86	28	65.0549	38	53.438	65.0549	47	21	25	60	130	70	157	135	60.4082	67.3783	59	29	100	50	72.0251	28	77	108	11	46	55.7614	53.438	62.7316	56	39	32	34	62.7316	55.7614	148	70	27	85	9	75	33	65.0549	84	154	78.9953
mmu-miR-204	MIMAT0000237	nmiR01191.1:1	Endogenous1	41	32	27.3102	28	47.7929	25.0344	33	14	14	38	141	23	130	145	38.6895	43.2412	70	46	73	31	56.8963	22	95	94	10	52	15.931	43.2412	29.5861	38	16	25	32	38.6895	40.9653	52	40	23	41	11	69	46	31.8619	40	57	29.5861
mmu-miR-205	MIMAT0000238	nmiR01192.1:1	Endogenous1	103	104	158.129	260	58.764	28.8478	160	136	47	75	564	48	207	294	116.46	102.57	102	70	160	76	111.117	157	141	164	33	107	87.6118	144.239	104.707	69	40	59	80	75.859	91.8855	168	120	79	133	48	118	93	67.3115	66	106	121.802
mmu-miR-206	MIMAT0000239	nmiR01193.1:1	Endogenous1	7	12	20.1429	15	17.044	9.2967	18	16	17	8	373	9	26	28	34.0879	26.3407	18	10	26	17	23.2418	15	24	49	8	15	23.2418	35.6374	32.5385	22	9	5	10	26.3407	21.6923	28	19	18	19	10	11	8	30.989	19	23	21.6923
mmu-miR-207	MIMAT0000240	nmiR01194.1:1	Endogenous1	5	12	16.6091	19	21.0382	11.0727	17	7	21	7	20	7	23	36	18.8237	15.5018	17	11	16	12	19.9309	19	28	24	4	5	13.2873	15.5018	13.2873	13	9	9	4	16.6091	13.2873	16	8	8	7	3	18	4	9.96547	12	10	16.6091
mmu-miR-208a	MIMAT0000520	nmiR01195.2:2	Endogenous1	80	17	15.0342	117	16.4009	10.9339	25	4	10	17	263	14	126	128	15.0342	8.20046	151	29	32	17	8.20046	130	50	93	8	14	15.0342	21.8679	12.3007	13	13	9	17	21.8679	10.9339	20	27	15	18	18	71	18	10.9339	16	29	12.3007
mmu-miR-208b	MIMAT0004939	nmiR01196.1:1	Endogenous1	38	33	4.87854	14	4.33648	2.7103	15	11	5	37	20	22	77	92	5.4206	1.62618	42	21	41	17	3.79442	10	22	35	4	45	2.7103	5.96266	3.25236	25	17	11	15	3.79442	3.79442	56	38	9	38	4	42	37	3.79442	26	28	3.25236
mmu-miR-20a+mmu-miR-20b	MIMAT0000529	nmiR01197.2:2	Endogenous1	918	721	122.49	1260	33.4064	11.1355	918	21	16	827	824	427	2571	2032	22.2709	14.8473	2106	1392	1558	504	22.2709	505	665	1564	95	2069	9.27955	116.922	22.2709	1178	903	850	2320	27.8387	14.8473	2313	1360	791	2042	9	968	1504	16.7032	1565	1855	18.5591
mmu-miR-21	MIMAT0000530	nmiR01198.1:1	Endogenous1	1892	667	191.729	101	203.712	83.8816	160	13	13	1682	612	1583	3228	2800	119.831	179.746	2624	970	2837	712	107.848	68	605	2204	36	3209	191.729	155.78	143.797	902	836	571	1174	179.746	131.814	2616	1305	180	1945	11	1423	1703	179.746	902	2422	107.848
mmu-miR-210	MIMAT0000658	nmiR01199.2:2	Endogenous1	152	133	16.4438	76	37.8208	3.28877	67	19	26	42	111	22	199	169	16.4438	14.7994	137	93	108	33	19.7326	43	46	113	3	121	8.22192	9.8663	18.0882	53	38	31	65	24.6657	18.0882	65	54	17	113	6	46	56	21.377	73	40	11.5107
mmu-miR-211	MIMAT0000668	nmiR01200.1:1	Endogenous1	8	13	22.8321	15	10.655	13.6993	12	4	9	9	21	14	20	30	19.7878	18.2657	20	8	23	16	13.6993	9	15	23	3	14	22.8321	21.31	10.655	21	3	6	8	16.7436	15.2214	18	9	10	15	4	14	12	10.655	5	13	10.655
mmu-miR-212	MIMAT0000659	nmiR01201.1:1	Endogenous1	17	14	25.3771	19	15.5082	14.0984	12	12	6	17	24	13	36	28	18.3279	28.1967	21	22	38	23	12.6885	13	35	29	5	9	26.7869	18.3279	21.1476	13	11	15	13	11.2787	18.3279	30	15	14	19	14	20	15	22.5574	13	20	18.3279
mmu-miR-2132	MIMAT0011208	nmiR01202.1:1	Endogenous1	109	83	15.1746	84	30.3492	15.1746	50	12	3	40	30	38	161	136	32.8783	5.05821	45	25	56	27	20.2328	19	29	57	9	58	20.2328	10.1164	22.7619	38	37	13	31	17.7037	15.1746	143	37	12	85	3	27	21	20.2328	84	91	20.2328
mmu-miR-2133	MIMAT0011209	nmiR01203.1:1	Endogenous1	12	5	12.448	12	6.22402	6.22402	12	11	10	15	26	10	27	28	15.56	21.7841	15	6	18	12	12.448	5	20	24	5	6	17.1161	18.6721	15.56	11	7	12	14	10.892	17.1161	18	13	7	7	10	19	8	12.448	10	23	10.892
mmu-miR-2134	MIMAT0011210	nmiR01204.1:1	Endogenous1	25	18	13.2336	18	26.4672	13.2336	10	8	6	20	26	15	45	45	18.1962	13.2336	27	11	29	15	13.2336	10	14	35	5	13	13.2336	18.1962	4.9626	19	6	11	22	13.2336	16.542	24	21	12	28	1	22	22	19.8504	16	21	21.5046
mmu-miR-2135	MIMAT0011211	nmiR01205.1:1	Endogenous1	11	17	19.8764	17	23.8517	11.9258	16	7	8	18	24	16	30	32	19.8764	7.95056	27	13	28	6	21.864	14	11	28	1	22	23.8517	25.8393	11.9258	14	8	14	10	17.8888	19.8764	20	23	10	13	10	24	17	13.9135	11	12	17.8888
mmu-miR-2136	MIMAT0011212	nmiR01206.1:1	Endogenous1	10	18	19.083	12	17.7199	13.6307	18	17	8	17	32	9	22	30	19.083	17.7199	14	10	31	13	14.9938	16	21	29	4	11	10.9046	12.2676	14.9938	10	6	15	18	35.4399	23.1722	13	14	9	9	11	19	14	23.1722	15	11	17.7199
mmu-miR-2137	MIMAT0011213	nmiR01207.1:1	Endogenous1	4	5	2.141	7	4.28201	2.141	7	8	2	4	9	9	14	18	12.846	8.56402	10	7	18	8	4.28201	5	5	9	1	15	4.28201	10.705	6.42301	9	2	9	6	10.705	4.28201	14	6	4	5	3	10	8	4.28201	4	14	6.42301
mmu-miR-2138	MIMAT0011214	nmiR01208.1:1	Endogenous1	13	17	1.67227	7	8.36136	8.36136	10	7	8	16	22	8	18	14	11.7059	10.0336	6	7	19	16	16.7227	6	20	22	2	10	13.3782	10.0336	1.67227	13	7	12	13	10.0336	1.67227	19	9	6	7	11	16	12	11.7059	6	18	20.0673
mmu-miR-2139	MIMAT0011215	nmiR01209.1:1	Endogenous1	9	12	25.762	19	31.2824	16.5613	19	12	3	23	30	18	37	54	14.7212	29.4423	17	15	37	27	34.9627	23	45	51	3	26	25.762	47.8437	25.762	15	12	11	18	14.7212	18.4014	36	15	16	7	7	51	12	16.5613	15	27	16.5613
mmu-miR-214	MIMAT0000661	nmiR01210.1:1	Endogenous1	195	158	23.6241	23	28.349	9.44965	31	4	5	103	53	28	225	174	14.1745	23.6241	64	38	132	38	33.0738	17	33	111	4	164	14.1745	47.2483	18.8993	60	86	24	56	37.7986	18.8993	172	62	16	54	4	73	93	18.8993	116	168	4.72483
mmu-miR-2140	MIMAT0011216	nmiR01211.1:1	Endogenous1	17	15	26.5694	14	16.9078	7.24619	16	14	6	20	22	29	33	19	9.66158	24.154	37	15	46	17	14.4924	18	32	27	7	26	16.9078	16.9078	16.9078	16	13	13	14	14.4924	24.154	30	21	6	19	7	26	24	28.9847	15	25	12.077
mmu-miR-2141	MIMAT0011217	nmiR01212.1:1	Endogenous1	58	18	48.7517	26	26.0009	16.2506	19	14	5	29	37	21	41	29	35.7512	45.5016	90	54	57	34	26.0009	13	21	40	2	35	29.251	45.5016	26.0009	77	65	18	29	48.7517	19.5007	62	44	14	40	11	45	101	13.0004	23	57	26.0009
mmu-miR-2145	MIMAT0011221	nmiR01213.1:1	Endogenous1	13	20	29.1705	30	26.7396	35.2477	25	27	26	14	46	17	46	53	30.3859	26.7396	22	12	47	22	21.8779	23	46	48	9	22	25.5242	31.6014	29.1705	31	12	11	12	29.1705	23.0933	32	28	40	27	15	35	19	29.1705	22	22	25.5242
mmu-miR-2146	MIMAT0011222	nmiR01214.1:1	Endogenous1	29	24	33.8759	41	35.2309	24.3907	36	21	34	31	43	20	75	64	29.8108	37.941	23	23	44	31	39.2961	22	73	66	12	15	40.6511	36.586	44.7162	32	31	16	13	36.586	36.586	39	43	33	35	12	42	25	37.941	45	41	27.1007
mmu-miR-216a	MIMAT0000662	nmiR01216.1:1	Endogenous1	14	18	44.4322	35	36.5912	31.3639	31	29	35	23	43	19	60	73	16.9888	23.5229	27	14	51	37	37.8981	28	59	58	11	14	33.9776	41.8186	43.1254	38	15	22	18	36.5912	30.0571	35	22	13	22	17	29	15	44.4322	16	20	31.3639
mmu-miR-216b	MIMAT0003729	nmiR01217.1:1	Endogenous1	9	16	14.5803	7	12.9603	14.5803	10	9	4	13	25	11	26	40	16.2003	8.10016	19	16	26	19	12.9603	10	18	24	4	14	19.4404	16.2003	21.0604	24	8	14	6	22.6805	11.3402	23	20	6	13	8	21	12	14.5803	8	25	16.2003
mmu-miR-217	MIMAT0000679	nmiR01218.1:1	Endogenous1	5	7	7.2942	2	11.6707	4.37652	5	2	5	9	14	14	22	19	8.75304	4.37652	9	6	11	11	11.6707	4	8	22	2	6	13.1296	7.2942	5.83536	12	2	7	1	10.2119	5.83536	13	9	4	4	6	11	5	13.1296	12	7	7.2942
mmu-miR-218	MIMAT0000663	nmiR01219.1:1	Endogenous1	447	132	64.2125	103	46.7	5.8375	129	10	8	297	81	271	638	552	46.7	11.675	351	187	451	120	46.7	62	165	431	13	500	23.35	81.7251	23.35	260	174	151	419	52.5375	23.35	517	329	136	685	7	381	451	29.1875	373	460	40.8625
mmu-miR-2182	MIMAT0011286	nmiR01220.1:1	Endogenous1	9	10	4.75585	5	11.097	7.92642	11	6	10	14	18	11	39	37	7.92642	14.2675	23	11	14	18	25.3645	12	15	55	2	9	12.6823	25.3645	17.4381	13	3	10	10	12.6823	12.6823	18	12	3	6	5	14	6	12.6823	6	17	12.6823
mmu-miR-2183	MIMAT0011287	nmiR01221.1:1	Endogenous1	254	264	106.726	18	172.795	45.7398	43	17	19	222	493	100	221	182	71.1508	55.9042	140	73	320	399	71.1508	29	81	150	20	174	101.644	137.219	127.055	165	116	21	53	86.3974	66.0686	325	193	33	187	15	128	78	55.9042	215	198	91.4796
mmu-miR-219	MIMAT0000664	nmiR01222.2:2	Endogenous1	34	18	53.9367	24	19.9766	43.9485	24	13	14	43	236	30	76	62	45.9461	55.9344	45	22	73	47	31.9625	28	43	91	7	15	41.9508	57.9321	31.9625	33	20	31	32	41.9508	39.9531	27	34	19	30	14	64	22	35.9578	34	40	49.9414
mmu-miR-22	MIMAT0000531	nmiR01223.2:2	Endogenous1	1858	911	440.553	1309	178.452	72.4961	1183	56	38	1670	1449	3351	3804	4169	128.262	167.299	3640	1837	3197	862	128.262	928	1141	2521	153	3852	122.686	702.654	217.488	1582	1024	1373	3207	55.7662	150.569	2735	1687	1776	3170	19	1752	2637	89.2259	1939	2875	128.262
mmu-miR-220	MIMAT0004863	nmiR01224.1:1	Endogenous1	10	13	17.8638	15	10.9931	15.1155	16	13	4	15	20	14	22	36	10.9931	17.8638	20	12	34	16	16.4897	16	14	33	8	10	8.24484	17.8638	17.8638	14	3	6	9	23.3604	15.1155	19	13	5	13	10	18	11	19.238	10	19	16.4897
mmu-miR-221	MIMAT0000669	nmiR01225.2:2	Endogenous1	65	32	32.8629	29	36.5144	36.5144	27	7	10	71	38	57	122	139	32.8629	36.5144	66	26	115	37	43.8172	18	35	68	6	79	32.8629	43.8172	54.7715	46	53	18	47	65.7258	40.1658	147	78	25	68	9	66	75	36.5144	97	126	40.1658
mmu-miR-222	MIMAT0000670	nmiR01226.1:1	Endogenous1	22	14	21.3097	7	29.3009	23.9734	12	9	10	21	17	42	39	35	21.3097	10.6549	14	15	34	21	15.9823	17	16	27	1	11	26.6372	26.6372	15.9823	20	14	10	14	23.9734	29.3009	39	20	6	21	4	23	28	13.3186	12	37	31.9646
mmu-miR-223	MIMAT0000665	nmiR01227.1:1	Endogenous1	413	295	127.761	156	147.416	39.311	167	19	16	312	284	294	1030	837	73.7081	127.761	735	441	431	180	78.6219	93	199	422	21	375	29.4832	117.933	39.311	292	231	125	338	54.0526	93.3635	515	272	175	419	10	193	264	58.9665	708	726	68.7942
mmu-miR-224	MIMAT0000671	nmiR01228.1:1	Endogenous1	21	28	19.3116	16	15.4493	11.587	17	15	15	9	169	16	61	52	17.3805	28.9674	27	16	36	26	19.3116	14	28	42	6	33	25.1051	23.1739	25.1051	25	11	20	18	28.9674	25.1051	30	26	14	12	11	33	18	28.9674	30	21	28.9674
mmu-miR-23a	MIMAT0000532	nmiR01229.1:1	Endogenous1	1234	969	188.855	346	90.3221	32.8444	412	57	38	868	1447	1459	2710	2323	123.167	287.389	3604	2366	2458	755	131.378	160	843	2068	78	3377	172.433	509.088	73.8999	1590	1169	1554	3614	164.222	123.167	1868	2155	730	2505	10	1253	2146	131.378	1948	1372	73.8999
mmu-miR-23b	MIMAT0000125	nmiR01230.1:1	Endogenous1	1034	684	182.793	130	602.142	96.7728	207	10	9	907	499	1357	2137	2040	150.535	96.7728	1393	688	1375	462	96.7728	104	440	1427	53	1687	129.03	215.051	75.2677	1083	1126	356	1136	139.783	75.2677	2786	1239	299	1432	10	923	1244	86.0203	2041	2675	129.03
mmu-miR-24	MIMAT0000219	nmiR01231.1:1	Endogenous1	349	143	16.3012	22	195.614	16.3012	23	1	1	218	135	385	572	502	16.3012	32.6024	298	97	364	95	32.6024	5	82	353	13	567	65.2048	97.8072	48.9036	146	213	66	156	16.3012	32.6024	608	154	25	199	2	281	286	48.9036	172	418	16.3012
mmu-miR-25	MIMAT0000652	nmiR01232.1:1	Endogenous1	937	493	154.303	774	75.7981	37.899	663	77	72	784	690	452	1830	2012	62.2627	92.0405	1832	1178	1243	376	64.9698	389	576	1122	74	1900	73.091	162.424	40.6061	898	629	1006	1834	64.9698	81.2122	1579	1048	478	1730	21	786	1256	46.0203	1102	1392	40.6061
mmu-miR-26a	MIMAT0000533	nmiR01233.1:1	Endogenous1	193	37	43.8047	27	49.2803	43.8047	42	13	12	151	33	126	263	151	76.6582	54.7559	68	27	186	49	76.6582	16	32	74	5	71	32.8535	43.8047	27.3779	69	67	17	24	65.7071	60.2315	382	86	22	122	8	60	64	32.8535	128	379	38.3291
mmu-miR-26b	MIMAT0000534	nmiR01234.1:1	Endogenous1	326	121	83.8086	43	83.8086	25.1426	100	7	4	298	93	465	567	497	16.7617	92.1894	414	183	449	151	33.5234	17	138	370	18	451	75.4277	134.094	75.4277	256	193	107	292	100.57	83.8086	561	387	64	430	7	261	404	100.57	345	580	92.1894
mmu-miR-27a	MIMAT0000537	nmiR01235.2:2	Endogenous1	1316	763	840.114	1188	413.66	29.8518	1017	168	171	1136	799	1409	2775	2200	106.613	452.041	2369	1335	1894	463	85.2908	1252	747	1680	76	2399	226.021	520.274	89.5553	1080	777	1820	2753	89.5553	260.137	2123	1458	1093	2334	30	1182	1888	59.7035	1567	2054	76.7617
mmu-miR-27b	MIMAT0000126	nmiR01236.1:1	Endogenous1	81	54	51.6593	32	54.888	48.4306	49	14	15	82	81	48	185	178	41.9732	51.6593	79	63	121	54	32.2871	26	65	101	12	115	51.6593	74.2602	51.6593	81	54	43	89	64.5741	29.0583	200	102	30	162	12	91	76	48.4306	150	164	71.0315
mmu-miR-28	MIMAT0000653	nmiR01237.1:1	Endogenous1	191	93	95.1748	74	91.6498	63.4499	79	29	49	224	144	112	369	420	102.225	88.1248	337	167	344	115	105.75	45	160	297	28	371	109.275	116.325	95.1748	226	153	86	211	130.425	81.0749	352	242	68	320	22	188	303	84.5998	202	346	98.6998
mmu-miR-2861	MIMAT0013803	nmiR01238.1:1	Endogenous1	3	2	18.8058	10	18.8058	11.2835	14	3	11	2	19	15	20	17	13.164	11.2835	10	9	12	8	11.2835	7	25	29	4	4	16.9252	13.164	18.8058	10	9	8	6	24.4475	13.164	11	13	9	4	5	13	2	9.40288	10	12	18.8058
mmu-miR-290-3p	MIMAT0004572	nmiR01239.1:1	Endogenous1	17	17	51.5223	37	63.5042	39.5404	59	40	40	30	78	32	94	94	44.3331	40.7386	49	32	60	47	57.5133	44	95	63	20	26	53.9187	55.1169	47.9277	66	27	19	24	51.5223	46.7295	43	43	43	40	28	39	23	53.9187	33	56	46.7295
mmu-miR-290-5p	MIMAT0000366	nmiR01240.1:1	Endogenous1	11	10	15.3577	24	17.0641	18.7705	18	9	9	8	20	13	31	44	10.2385	22.1833	13	14	31	24	23.8897	12	34	38	8	5	8.53205	15.3577	18.7705	13	8	12	11	22.1833	18.7705	17	13	12	14	8	29	5	20.4769	19	18	22.1833
mmu-miR-291a-3p	MIMAT0000368	nmiR01241.1:1	Endogenous1	13	15	26.2815	25	33.7905	30.036	28	15	27	24	46	29	43	61	33.7905	25.03	25	20	35	38	27.533	28	80	46	15	11	21.2755	26.2815	37.5449	22	20	18	16	37.5449	41.2994	41	19	22	20	14	31	14	22.527	28	30	31.2875
mmu-miR-291a-5p	MIMAT0000367	nmiR01242.1:1	Endogenous1	2	1	7.24176	13	4.82784	4.82784	6	14	9	1	13	10	1	9	7.24176	8.85104	13	10	25	1	11.265	15	1	17	2	5	9.65568	8.85104	5.63248	9	3	7	3	6.43712	4.82784	12	1	8	8	7	17	1	5.63248	18	1	3.21856
mmu-miR-291b-3p	MIMAT0003190	nmiR01243.1:1	Endogenous1	8	11	9.22008	12	7.6834	12.2934	7	9	7	11	18	10	24	18	15.3668	6.14672	8	12	19	15	16.9035	5	14	30	5	5	15.3668	19.9768	10.7568	12	3	8	8	24.5869	10.7568	15	11	2	8	10	21	8	13.8301	6	13	13.8301
mmu-miR-291b-5p	MIMAT0003189	nmiR01244.1:1	Endogenous1	5	10	6.21135	9	9.31702	9.31702	9	9	7	14	15	9	14	30	10.8699	10.8699	16	10	21	6	9.31702	3	14	16	3	16	17.0812	12.4227	9.31702	13	7	9	10	20.1869	9.31702	6	9	1	10	5	23	8	9.31702	7	4	12.4227
mmu-miR-292-3p	MIMAT0000370	nmiR01245.1:1	Endogenous1	20	10	8.7437	13	13.1156	10.9296	10	4	8	8	22	21	32	35	17.4874	19.6733	25	13	24	14	10.9296	8	17	24	5	21	21.8593	26.2311	19.6733	15	11	14	26	15.3015	13.1156	27	19	10	25	8	24	22	19.6733	16	21	21.8593
mmu-miR-292-5p	MIMAT0000369	nmiR01246.1:1	Endogenous1	8	9	12.6191	10	14.4218	5.40818	13	9	4	8	20	12	19	27	9.01363	21.6327	13	8	17	13	12.6191	7	19	16	2	5	9.01363	16.2245	10.8164	17	10	9	7	18.0273	5.40818	24	15	12	8	7	10	7	14.4218	23	22	18.0273
mmu-miR-293	MIMAT0000371	nmiR01247.1:1	Endogenous1	13	6	17.3958	15	15.6562	8.69788	8	11	6	13	13	14	25	22	17.3958	10.4375	12	7	14	13	1.73958	10	16	31	2	12	13.9166	22.6145	6.95831	12	11	9	11	10.4375	8.69788	17	7	8	9	3	21	13	6.95831	13	18	15.6562
mmu-miR-294	MIMAT0000372	nmiR01248.1:1	Endogenous1	7	13	14.3515	11	15.9461	14.3515	13	5	3	18	25	12	26	20	11.1623	14.3515	20	6	23	10	1.59461	10	14	24	1	10	15.9461	4.78382	14.3515	9	5	13	13	17.5407	9.56765	16	12	9	6	6	19	13	12.7569	10	13	9.56765
mmu-miR-295	MIMAT0000373	nmiR01249.1:1	Endogenous1	9	7	10.4222	11	11.9111	11.9111	3	6	1	5	15	8	18	21	10.4222	7.44443	8	4	16	7	7.44443	13	13	24	4	8	2.97777	20.8444	8.93331	9	6	5	13	14.8889	8.93331	4	5	6	4	12	31	6	14.8889	5	9	16.3777
mmu-miR-296-3p	MIMAT0004576	nmiR01250.1:1	Endogenous1	10	5	4.38372	11	7.3062	10.2287	3	8	8	9	14	10	22	25	16.0736	17.5349	10	12	26	20	11.6899	12	14	17	1	12	16.0736	13.1512	8.76744	18	4	10	10	13.1512	13.1512	14	12	5	13	10	11	11	13.1512	13	6	13.1512
mmu-miR-296-5p	MIMAT0000374	nmiR01251.1:1	Endogenous1	150	89	22.3665	11	33.5497	18.6387	24	5	5	90	42	17	242	204	22.3665	11.1832	72	45	133	52	18.6387	8	33	98	2	116	41.0052	29.822	22.3665	41	70	14	32	18.6387	33.5497	145	64	8	69	3	55	57	37.2775	51	80	37.2775
mmu-miR-297a+mmu-miR-466f+mmu-miR-669b	MIMAT0000375	nmiR01252.1:1	Endogenous1	47	34	52.3777	10	170.797	11.3865	26	21	10	37	50	28	60	73	34.1594	20.4956	40	17	83	58	34.1594	12	38	74	6	46	34.1594	47.8231	22.7729	30	16	21	13	34.1594	36.4366	41	33	11	20	11	55	29	22.7729	21	30	22.7729
mmu-miR-297b-3p	MIMAT0004827	nmiR01253.1:1	Endogenous1	10	5	7.3567	7	5.88536	1.47134	15	5	4	9	19	11	20	23	14.7134	7.3567	11	8	17	9	7.3567	4	12	12	5	11	10.2994	17.6561	8.82804	11	5	7	5	10.2994	14.7134	10	11	14	6	5	15	7	10.2994	8	8	5.88536
mmu-miR-297b-5p	MIMAT0003480	nmiR01254.1:1	Endogenous1	14	15	15.7624	8	18.6282	1.43294	11	14	8	22	16	15	29	32	10.0306	14.3294	21	6	13	7	11.4635	14	17	28	4	3	14.3294	17.1953	10.0306	16	6	8	4	15.7624	20.0612	18	11	7	8	10	17	10	18.6282	13	14	17.1953
mmu-miR-297c	MIMAT0004865	nmiR01255.1:1	Endogenous1	85	81	53.0381	21	318.228	24.7511	60	23	18	46	123	54	75	78	28.287	63.6457	79	53	165	126	84.8609	13	27	66	4	108	53.0381	60.1098	31.8228	60	57	20	23	53.0381	38.8946	114	55	12	34	10	77	34	67.1815	77	77	14.1435
mmu-miR-298	MIMAT0000376	nmiR01256.1:1	Endogenous1	18	21	20.7526	20	12.1057	5.18814	16	10	4	20	37	17	36	68	34.5876	17.2938	22	20	42	28	12.1057	19	22	44	3	23	15.5644	12.1057	20.7526	17	10	6	18	15.5644	15.5644	33	20	13	17	13	24	15	19.0232	10	28	19.0232
mmu-miR-299	MIMAT0004577	nmiR01257.1:1	Endogenous1	20	16	18.1145	9	12.9389	7.76334	17	13	15	13	24	20	35	41	18.1145	27.1717	25	12	29	17	23.29	10	21	25	6	10	19.4083	16.8206	24.5839	11	9	18	9	21.9961	24.5839	14	18	16	8	7	14	11	10.3511	15	12	21.9961
mmu-miR-29a	MIMAT0000535	nmiR01258.1:1	Endogenous1	736	376	182.593	98	150.838	47.633	181	55	46	531	480	2296	1491	1380	63.5106	254.042	1086	561	808	198	119.082	102	234	569	21	967	150.838	238.165	111.144	266	203	219	502	103.205	158.777	680	601	155	915	6	337	458	127.021	491	593	103.205
mmu-miR-29b	MIMAT0000127	nmiR01259.1:1	Endogenous1	245	120	146.883	56	129.935	90.3898	92	35	26	124	70	492	427	251	129.935	96.0392	262	95	304	76	118.637	47	106	180	10	219	101.689	180.78	118.637	98	64	83	150	112.987	112.987	183	228	49	300	31	113	203	90.3898	169	125	152.533
mmu-miR-29c	MIMAT0000536	nmiR01260.1:1	Endogenous1	199	118	79.5817	48	92.8454	53.0545	54	19	12	135	117	564	375	363	79.5817	79.5817	270	130	277	85	86.2136	46	99	224	17	237	99.4772	132.636	119.373	110	74	71	137	112.741	59.6863	207	167	48	227	12	152	186	66.3181	104	157	72.9499
mmu-miR-300	MIMAT0000378	nmiR01261.2:2	Endogenous1	63	58	24.089	63	16.4819	20.2855	66	13	4	56	135	29	153	146	16.4819	20.2855	56	31	72	36	29.1604	37	32	78	8	79	20.2855	19.0176	25.3568	37	29	20	49	31.6961	17.7498	67	41	20	73	8	59	44	15.2141	35	51	22.8212
mmu-miR-301a	MIMAT0000379	nmiR01262.1:1	Endogenous1	624	309	298.849	237	169.8	64.5241	330	60	81	371	364	105	992	927	54.3361	173.196	794	444	581	206	91.6922	196	305	505	42	920	112.068	139.236	91.6922	295	207	520	789	98.4842	78.1082	484	423	161	577	14	311	510	81.5042	374	368	95.0882
mmu-miR-301b	MIMAT0004186	nmiR01263.1:1	Endogenous1	63	44	61.7553	23	52.9331	26.4665	16	15	8	59	87	108	167	116	35.2887	39.6998	142	69	126	52	74.9885	14	47	84	5	114	35.2887	61.7553	48.522	52	38	33	74	57.3442	35.2887	103	60	13	75	10	62	58	22.0554	49	89	61.7553
mmu-miR-302a	MIMAT0000380	nmiR01264.1:1	Endogenous1	6	5	8.10567	10	16.2113	9.7268	7	4	10	7	11	12	13	26	11.3479	8.10567	12	6	11	13	6.48453	7	4	19	1	11	8.10567	11.3479	14.5902	9	2	4	12	16.2113	9.7268	12	8	4	8	6	13	6	17.8325	5	10	6.48453
mmu-miR-302b	MIMAT0003374	nmiR01265.2:2	Endogenous1	13	16	2.09993	7	8.39971	18.8993	17	7	7	16	94	13	35	42	12.5996	29.399	34	16	26	14	10.4996	14	18	40	3	11	18.8993	20.9993	16.7994	15	14	10	25	23.0992	25.1991	32	19	12	31	13	26	12	20.9993	14	34	33.5988
mmu-miR-302c	MIMAT0003376	nmiR01266.1:1	Endogenous1	1	4	7.11702	5	4.27021	4.27021	4	2	1	5	6	5	10	10	2.84681	5.69362	6	7	7	5	8.54042	5	8	7	1	6	7.11702	2.84681	9.96383	8	1	5	2	7.11702	7.11702	6	5	2	7	4	10	2	7.11702	3	7	4.27021
mmu-miR-302d	MIMAT0003377	nmiR01267.1:1	Endogenous1	27	11	28.4606	8	14.2303	12.4515	16	12	15	20	49	20	30	38	17.7878	26.6818	11	20	31	22	17.7878	14	18	20	3	28	12.4515	26.6818	16.0091	25	8	16	19	23.1242	17.7878	24	29	17	15	9	24	20	19.5666	12	22	24.903
mmu-miR-3072	MIMAT0014853	nmiR01268.1:1	Endogenous1	8	9	8.26732	17	13.2277	6.61386	5	9	9	7	15	17	21	28	8.26732	9.92079	9	9	12	8	13.2277	11	16	19	3	9	4.96039	11.5743	6.61386	4	8	5	10	11.5743	13.2277	16	11	3	9	2	24	4	8.26732	8	8	4.96039
mmu-miR-3099	MIMAT0014816	nmiR01269.1:1	Endogenous1	5	4	13.3952	5	5.02322	6.69762	12	7	5	15	9	8	23	17	13.3952	6.69762	17	1	19	8	13.3952	10	12	16	1	8	10.0464	6.69762	11.7208	10	2	4	6	11.7208	5.02322	12	5	6	5	3	17	14	5.02322	5	6	10.0464
mmu-miR-30a	MIMAT0000128	nmiR01270.1:1	Endogenous1	1216	580	172.029	96	229.372	206.435	175	20	18	1358	848	2197	2652	2600	229.372	240.84	2522	1264	2323	598	160.56	64	546	1547	57	2236	137.623	378.464	172.029	952	840	495	1184	183.498	172.029	2344	1280	187	1879	11	990	1393	149.092	857	2133	240.84
mmu-miR-30b	MIMAT0000130	nmiR01271.1:1	Endogenous1	1627	456	172.843	97	777.792	237.659	223	27	18	1050	319	1424	2317	1390	291.672	280.87	657	327	1587	492	356.488	42	307	1001	42	1039	237.659	410.502	205.251	513	577	140	342	183.645	237.659	2147	822	113	1077	17	704	667	280.87	677	1909	259.264
mmu-miR-30c	MIMAT0000514	nmiR01272.2:2	Endogenous1	1560	829	818.15	1331	377.607	33.8879	1138	61	46	1417	1306	1665	3414	3333	53.2523	106.505	3107	1922	2430	659	87.1402	1379	880	1948	104	3369	82.2991	731.009	96.8224	1326	867	1957	3702	72.6168	82.2991	1798	1910	1218	3076	27	1291	2219	38.729	1479	1494	53.2523
mmu-miR-30d	MIMAT0000515	nmiR01273.1:1	Endogenous1	1141	404	149.209	97	385.457	87.0387	151	12	7	1118	465	1324	1935	1929	124.341	74.6046	1203	586	1456	358	136.775	50	400	1053	47	1277	211.38	186.511	186.511	674	552	287	781	211.38	174.077	1557	798	176	988	10	652	1005	111.907	527	1274	186.511
mmu-miR-30e	MIMAT0000248	nmiR01274.1:1	Endogenous1	172	65	53.32	19	94.7911	41.4711	32	13	7	139	92	174	313	279	100.715	77.0177	152	47	170	46	41.4711	16	68	169	9	191	88.8666	65.1688	88.8666	76	73	49	65	65.1688	65.1688	200	106	15	145	11	110	94	82.9422	86	236	71.0933
mmu-miR-31	MIMAT0000538	nmiR01275.1:1	Endogenous1	54	31	28.1788	11	12.5239	18.7859	16	11	3	34	28	46	82	50	43.8337	31.3098	49	26	81	26	21.9169	14	22	51	2	49	40.7028	28.1788	18.7859	33	27	6	20	18.7859	18.7859	78	34	8	35	9	42	30	21.9169	43	68	31.3098
mmu-miR-32	MIMAT0000654	nmiR01276.1:1	Endogenous1	128	80	35.7027	11	35.7027	25.5019	22	8	6	70	23	99	254	112	15.3011	45.9034	126	39	159	57	51.0038	16	32	139	5	153	25.5019	61.2046	25.5019	77	58	26	59	30.6023	56.1042	240	88	20	82	5	80	90	20.4015	148	163	51.0038
mmu-miR-320	MIMAT0000666	nmiR01277.1:1	Endogenous1	21	23	55.2711	29	42.8351	29.0173	51	19	25	25	55	39	66	71	35.9262	33.1627	36	20	62	34	52.5076	24	73	66	11	35	46.9805	30.3991	63.5618	29	28	18	24	45.5987	42.8351	46	36	20	35	23	44	22	38.6898	43	31	34.5445
mmu-miR-322	MIMAT0000548	nmiR01278.1:1	Endogenous1	3059	1718	1438.71	1602	1618.12	64.3186	1518	371	403	1380	1978	269	5374	4416	199.726	545.016	5296	2853	3890	1142	182.8	1081	1215	2521	142	5704	155.719	423.149	426.534	1107	723	2202	3131	169.26	179.415	1129	2109	655	2376	25	1099	1584	162.489	956	586	84.6298
mmu-miR-323-3p	MIMAT0000551	nmiR01279.1:1	Endogenous1	40	40	57.824	32	65.2852	48.4976	23	30	41	55	63	50	155	178	41.0364	55.9587	66	44	102	59	57.824	31	110	147	35	39	52.2282	54.0934	57.824	66	18	29	20	72.7464	55.9587	81	50	23	25	17	73	29	61.5546	26	77	48.4976
mmu-miR-323-5p	MIMAT0004638	nmiR01280.1:1	Endogenous1	7	17	29.6071	26	30.8943	11.5854	11	21	21	10	39	26	35	44	27.0325	36.0434	28	14	42	29	36.0434	18	61	44	14	14	25.7453	23.1707	32.1816	25	11	13	12	39.9052	28.3198	41	16	22	25	10	29	8	24.458	30	17	19.309
mmu-miR-324-3p	MIMAT0000556	nmiR01281.1:1	Endogenous1	7	7	7.13091	9	7.13091	5.70472	10	8	5	5	19	9	8	20	7.13091	7.13091	9	13	8	6	7.13091	11	13	19	3	9	9.98327	9.98327	8.55709	8	2	17	6	14.2618	12.8356	11	7	5	12	4	14	3	4.27854	7	6	11.4094
mmu-miR-324-5p	MIMAT0000555	nmiR01282.1:1	Endogenous1	101	53	29.8641	15	33.5972	14.9321	20	12	11	44	38	28	119	123	41.0632	44.7962	103	45	134	48	33.5972	16	37	103	3	154	33.5972	48.5292	37.3302	40	50	12	47	44.7962	52.2623	116	58	14	46	7	53	58	33.5972	47	98	52.2623
mmu-miR-325	MIMAT0004640	nmiR01283.1:1	Endogenous1	7	13	5.25738	11	15.7721	7.88607	5	12	4	11	26	14	19	21	10.5148	10.5148	15	6	17	11	17.0865	10	17	27	2	7	14.4578	11.8291	15.7721	9	3	6	8	14.4578	5.25738	19	10	7	13	6	14	16	15.7721	6	8	19.7152
mmu-miR-326	MIMAT0000559	nmiR01284.2:2	Endogenous1	78	56	38.9193	55	74.5953	12.9731	54	13	9	90	78	63	158	185	38.9193	38.9193	115	58	165	49	42.1626	71	46	98	10	112	48.6491	32.4327	42.1626	52	32	52	145	45.4058	48.6491	121	77	56	106	12	78	105	38.9193	87	89	29.1895
mmu-miR-327	MIMAT0004867	nmiR01285.1:1	Endogenous1	8	10	18.8678	19	10.2915	1.71525	12	9	5	7	12	10	25	26	22.2983	8.57627	20	10	22	18	12.0068	4	17	28	1	5	13.722	15.4373	20.583	12	6	4	10	13.722	20.583	13	16	6	7	8	17	6	10.2915	19	11	17.1525
mmu-miR-328	MIMAT0000565	nmiR01286.2:2	Endogenous1	71	60	50.8599	26	38.7504	33.9066	34	20	16	62	109	42	122	101	41.1723	38.7504	150	71	189	77	33.9066	33	49	66	4	168	29.0628	60.5475	38.7504	47	40	23	33	48.438	31.4847	83	96	29	116	12	45	29	58.1256	41	54	48.438
mmu-miR-329	MIMAT0000567	nmiR01287.1:1	Endogenous1	274	150	38.8068	149	38.8068	24.0233	167	15	15	106	356	23	487	427	16.6315	22.1753	365	199	288	85	22.1753	85	94	220	13	281	14.7836	27.7192	20.3274	126	91	95	211	22.1753	36.9589	101	153	47	209	11	108	134	14.7836	77	56	18.4794
mmu-miR-33	MIMAT0000667	nmiR01288.1:1	Endogenous1	31	20	24.7148	15	29.2084	15.7276	20	16	16	22	36	30	53	38	26.9616	35.9488	54	20	49	21	29.2084	16	34	40	1	63	13.4808	26.9616	38.1956	32	11	30	22	17.9744	20.2212	38	38	14	19	6	33	21	11.234	25	31	20.2212
mmu-miR-330	MIMAT0004642	nmiR01289.1:1	Endogenous1	12	15	9.14176	18	13.7126	3.04725	16	6	10	10	21	8	27	21	18.2835	12.189	15	7	15	14	7.61813	5	12	17	3	13	13.7126	7.61813	9.14176	8	2	9	10	12.189	9.14176	19	14	2	11	6	19	13	7.61813	14	23	12.189
mmu-miR-331-3p	MIMAT0000571	nmiR01290.1:1	Endogenous1	44	43	51.0079	9	40.8063	15.3024	15	6	4	40	44	30	108	114	10.2016	51.0079	90	39	85	26	51.0079	9	35	79	3	110	20.4031	45.9071	15.3024	38	29	34	52	30.6047	15.3024	83	48	13	48	1	61	47	35.7055	35	70	30.6047
mmu-miR-331-5p	MIMAT0004643	nmiR01291.1:1	Endogenous1	8	10	16.468	8	8.98257	5.98838	15	9	4	16	16	15	21	14	8.98257	10.4797	17	16	23	7	7.48547	10	13	24	5	15	16.468	17.9651	20.9593	12	8	6	16	20.9593	4.49128	13	12	6	8	12	14	15	13.4739	12	19	7.48547
mmu-miR-335-3p	MIMAT0004704	nmiR01292.1:1	Endogenous1	211	56	15.856	26	12.6848	12.6848	42	3	3	131	42	15	378	333	19.0273	15.856	105	59	159	57	12.6848	12	56	176	5	163	6.34242	19.0273	19.0273	102	86	24	60	22.1985	6.34242	262	98	12	128	2	127	87	22.1985	80	171	19.0273
mmu-miR-335-5p	MIMAT0000766	nmiR01293.1:1	Endogenous1	1897	860	246.901	457	250.948	117.379	653	112	134	1219	1098	181	4139	3232	80.951	169.997	3611	2145	2727	740	153.807	287	1023	2342	80	4348	133.569	254.996	141.664	1261	863	1606	2783	149.759	93.0937	1150	2160	519	2596	20	1113	1667	137.617	1186	643	133.569
mmu-miR-337-3p	MIMAT0000578	nmiR01294.1:1	Endogenous1	23	21	30.9103	21	33.5982	34.9421	28	15	12	18	64	14	57	72	24.1907	29.5664	35	12	38	28	37.63	29	59	60	21	19	29.5664	32.2543	30.9103	19	18	11	28	25.5346	30.9103	36	21	23	27	13	32	15	32.2543	23	23	36.286
mmu-miR-337-5p	MIMAT0004644	nmiR01295.1:1	Endogenous1	10	20	48.8665	22	39.8648	18.0035	31	20	28	14	35	30	46	59	20.5754	28.2911	24	19	29	30	32.149	27	59	55	8	20	19.2894	27.0052	34.7209	25	29	14	13	21.8613	28.2911	39	20	15	25	23	31	16	27.0052	20	26	28.2911
mmu-miR-338-3p	MIMAT0000582	nmiR01296.1:1	Endogenous1	32	34	76.59	24	69.93	73.26	49	17	20	32	73	119	99	94	46.62	43.29	62	38	63	45	53.28	34	54	68	7	72	73.26	56.61	49.95	69	50	30	67	103.23	56.61	84	66	35	73	19	59	57	66.6	96	86	43.29
mmu-miR-338-5p	MIMAT0004647	nmiR01297.1:1	Endogenous1	25	32	23.5047	19	28.9289	18.0806	27	18	15	23	37	24	47	44	21.6967	27.1208	40	26	49	37	36.1611	18	55	36	6	20	30.737	32.545	30.737	32	18	10	17	39.7772	50.6256	48	31	17	25	12	34	10	30.737	37	33	32.545
mmu-miR-339-3p	MIMAT0004649	nmiR01298.1:1	Endogenous1	7	6	10.7528	13	8.06461	4.03231	12	14	8	12	18	11	20	33	5.37641	12.0969	7	9	22	15	13.441	17	14	38	3	5	16.1292	8.06461	12.0969	10	5	11	8	13.441	9.40871	13	8	7	6	2	16	11	12.0969	7	11	14.7851
mmu-miR-339-5p	MIMAT0000584	nmiR01299.1:1	Endogenous1	5	9	8.53204	3	7.11003	4.26602	13	11	3	7	12	10	13	22	8.53204	4.26602	10	5	14	8	15.6421	8	12	11	2	4	8.53204	15.6421	9.95405	11	2	7	4	2.84401	17.0641	8	7	6	6	7	11	5	8.53204	7	7	15.6421
mmu-miR-340-3p	MIMAT0000586	nmiR01300.1:1	Endogenous1	33	27	22.9495	17	22.9495	39.0141	31	9	9	25	309	25	74	62	36.7192	32.1293	59	33	56	35	25.2444	18	41	67	3	54	34.4242	36.7192	32.1293	34	33	24	49	25.2444	9.17979	62	42	18	45	8	36	32	41.3091	38	55	50.4888
mmu-miR-340-5p	MIMAT0004651	nmiR01301.1:1	Endogenous1	114	44	44.2571	32	25.8166	22.1285	47	11	8	77	56	75	233	172	25.8166	29.5047	156	66	188	63	22.1285	27	71	183	6	202	40.569	40.569	29.5047	96	64	64	118	25.8166	29.5047	205	157	33	231	9	109	123	66.3856	176	227	40.569
mmu-miR-341	MIMAT0000588	nmiR01302.1:1	Endogenous1	14	11	12.7595	10	14.1772	15.595	16	11	5	14	28	17	31	33	14.1772	9.92406	24	9	26	17	19.8481	12	23	28	3	11	11.3418	18.4304	24.1013	14	8	15	6	21.2659	18.4304	17	17	12	10	7	12	13	25.519	17	10	17.0127
mmu-miR-342-3p	MIMAT0000590	nmiR01303.1:1	Endogenous1	325	188	57.0691	111	196.571	31.7051	153	21	18	264	213	215	712	707	95.1152	76.0922	577	328	552	158	69.7512	99	197	451	35	625	76.0922	183.889	57.0691	359	251	179	496	114.138	57.0691	350	460	132	406	9	284	435	88.7742	170	212	82.4332
mmu-miR-342-5p	MIMAT0004653	nmiR01304.1:1	Endogenous1	16	13	17.8915	14	16.1024	5.36746	14	12	7	19	38	20	50	62	21.4698	19.6807	32	26	42	16	16.1024	17	27	56	8	25	26.8373	32.2048	19.6807	27	20	14	19	21.4698	16.1024	21	25	16	34	7	29	20	21.4698	29	16	26.8373
mmu-miR-343	MIMAT0004868	nmiR01305.1:1	Endogenous1	7	10	8.5182	7	8.5182	4.2591	9	14	5	6	9	13	22	39	14.197	18.4561	16	11	25	15	17.0364	17	19	18	3	7	14.197	18.4561	9.9379	9	5	11	10	19.8758	9.9379	14	10	14	7	9	20	6	11.3576	12	15	9.9379
mmu-miR-344	MIMAT0000593	nmiR01306.1:1	Endogenous1	12	8	7.71293	12	9.25552	6.17035	7	14	5	6	7	15	21	23	7.71293	10.7981	10	13	13	13	12.3407	12	10	24	5	10	9.25552	20.0536	7.71293	6	2	5	6	6.17035	6.17035	13	13	4	5	5	14	8	4.62776	11	10	12.3407
mmu-miR-345-3p	MIMAT0004656	nmiR01307.1:1	Endogenous1	14	18	16.8323	22	25.8959	14.2428	17	14	7	19	33	18	31	41	24.6011	14.2428	21	12	24	14	22.0115	18	21	32	3	24	9.06357	20.7167	24.6011	18	12	18	26	29.7803	28.4855	28	16	13	15	10	15	19	20.7167	13	13	14.2428
mmu-miR-345-5p	MIMAT0000595	nmiR01308.1:1	Endogenous1	70	38	23.7224	19	20.3335	13.5557	15	3	2	47	37	20	94	103	23.7224	23.7224	65	48	76	21	16.9446	11	24	62	6	71	16.9446	27.1113	10.1668	39	40	21	45	20.3335	10.1668	74	39	16	70	7	28	35	13.5557	39	47	20.3335
mmu-miR-346	MIMAT0000597	nmiR01309.2:2	Endogenous1	10	3	11.758	5	8.3986	6.71888	8	6	6	12	22	11	19	24	10.0783	13.4378	23	13	17	8	8.3986	6	7	25	2	15	13.4378	8.3986	15.1175	12	3	9	13	15.1175	13.4378	19	9	16	2	4	14	12	15.1175	10	12	11.758
mmu-miR-3470a+mmu-miR-3470b	MIMAT0015640	nmiR01310.1:1	Endogenous1	9	10	5.74221	15	12.92	12.92	14	6	8	17	28	9	19	29	18.6622	21.5333	23	13	30	20	12.92	14	15	25	4	13	17.2266	18.6622	15.7911	14	5	10	17	15.7911	8.61332	17	15	7	14	11	14	16	18.6622	12	23	7.17777
mmu-miR-3471	MIMAT0015642	nmiR01311.1:1	Endogenous1	18	12	26.2925	31	8.76416	10.517	30	7	4	14	64	15	46	52	22.7868	12.2698	26	18	34	22	24.5397	19	15	36	6	14	10.517	21.034	15.7755	19	19	13	50	22.7868	15.7755	36	15	8	28	7	27	36	8.76416	29	21	24.5397
mmu-miR-3472	MIMAT0015643	nmiR01312.1:1	Endogenous1	12	11	19.5869	15	14.6902	9.79347	16	1	4	10	25	11	19	26	11.4257	11.4257	10	9	22	17	16.3225	12	19	23	3	19	6.52898	9.79347	17.9547	15	3	10	13	22.8514	13.058	25	11	7	12	8	15	10	6.52898	11	13	11.4257
mmu-miR-3473	MIMAT0015645	nmiR01313.1:1	Endogenous1	9	20	34.9478	30	25.8873	25.8873	31	17	30	25	46	23	59	63	19.4155	28.476	29	14	45	27	37.5366	36	52	52	11	19	32.3591	31.0647	32.3591	27	16	15	12	41.4197	27.1817	31	14	18	22	12	26	18	28.476	27	25	28.476
mmu-miR-3474	MIMAT0015646	nmiR01314.1:1	Endogenous1	10	5	13.4715	15	15.7167	13.4715	27	17	23	10	43	11	30	39	13.4715	13.4715	21	14	30	16	17.962	16	43	28	8	8	19.0846	16.8394	13.4715	16	7	5	5	28.0656	14.5941	25	12	18	16	13	15	10	22.4525	14	20	21.3298
mmu-miR-3475	MIMAT0015219	nmiR01315.1:1	Endogenous1	10	13	18.3935	23	25.291	13.7951	34	13	26	16	27	11	31	52	21.8423	19.5431	27	16	28	16	22.9918	20	44	51	5	17	32.1886	22.9918	26.4406	24	16	17	16	14.9447	25.291	22	20	16	16	11	26	17	22.9918	19	28	25.291
mmu-miR-34a	MIMAT0000542	nmiR01316.1:1	Endogenous1	130	44	36.2471	31	59.5489	41.4253	33	15	32	68	43	55	166	144	20.7127	46.6035	60	50	104	56	41.4253	26	60	100	6	65	56.9598	69.9052	51.7816	43	38	24	30	54.3707	62.138	124	56	20	54	10	59	31	44.0144	43	76	49.1926
mmu-miR-34b-3p	MIMAT0004581	nmiR01317.1:1	Endogenous1	42	27	38.8802	32	24.0687	38.8802	35	22	19	30	44	27	140	169	42.5831	35.1773	43	19	78	26	62.9489	19	50	73	12	60	38.8802	33.3259	46.286	35	21	17	21	40.7316	40.7316	54	43	22	40	11	43	44	46.286	32	30	46.286
mmu-miR-34b-5p	MIMAT0000382	nmiR01318.1:1	Endogenous1	64	25	32.4823	21	48.7234	37.896	29	16	24	30	46	23	209	194	18.948	73.0851	68	21	141	37	62.2577	23	60	96	10	168	70.3782	37.896	37.896	24	37	14	37	59.5508	46.0165	91	70	22	52	14	55	82	43.3097	25	36	37.896
mmu-miR-34c	MIMAT0000381	nmiR01319.1:1	Endogenous1	2085	7033	1494.75	1	1494.75	1494.75	1	1	1	1187	5419	1	3959	3122	1494.75	1494.75	5486	3569	3556	5260	1494.75	1	322	2158	1	1559	1494.75	1494.75	1494.75	4802	6799	1	1	1494.75	1494.75	7902	2140	1	1	1	1915	1	1494.75	4694	5816	1494.75
mmu-miR-350	MIMAT0000605	nmiR01320.1:1	Endogenous1	133	112	89.0196	69	100.889	47.4771	71	14	9	125	109	113	362	239	59.3464	41.5425	240	146	171	80	29.6732	32	66	182	5	189	53.4118	77.1503	59.3464	139	97	92	234	65.2811	94.9543	278	171	63	150	10	129	158	71.2157	217	273	65.2811
mmu-miR-351	MIMAT0000609	nmiR01321.2:2	Endogenous1	66	39	9.00088	72	12.8584	6.4292	47	9	9	54	35	20	134	94	12.8584	6.4292	40	27	81	39	5.14336	28	24	62	6	45	15.4301	11.5726	12.8584	64	68	15	44	6.4292	3.85752	177	82	26	130	9	41	35	9.00088	145	173	5.14336
mmu-miR-361	MIMAT0000704	nmiR01322.1:1	Endogenous1	103	46	48.7204	25	34.8003	48.7204	31	18	9	81	89	45	207	157	41.7603	10.4401	72	29	124	45	31.3202	14	40	127	6	65	27.8402	48.7204	41.7603	72	74	14	37	27.8402	20.8802	259	106	20	107	9	77	49	38.2803	129	264	27.8402
mmu-miR-362-3p	MIMAT0004684	nmiR01323.1:1	Endogenous1	40	26	26.1066	15	11.6029	11.6029	18	12	9	26	35	29	94	62	11.6029	17.4044	89	62	97	28	20.3052	14	36	59	2	112	29.0074	20.3052	29.0074	26	27	47	72	34.8088	11.6029	30	62	17	58	4	32	51	5.80147	36	21	14.5037
mmu-miR-362-5p	MIMAT0000706	nmiR01324.1:1	Endogenous1	27	12	20.9454	15	14.5006	9.66709	18	8	9	16	21	14	40	37	25.7789	19.3342	21	18	50	19	11.2783	16	13	34	1	15	12.8895	22.5565	22.5565	23	22	16	9	20.9454	12.8895	43	26	10	15	10	12	19	12.8895	19	28	16.1118
mmu-miR-363	MIMAT0000708	nmiR01325.1:1	Endogenous1	9	9	14.737	5	5.8948	1.4737	5	8	1	6	13	10	13	28	5.8948	13.2633	8	5	18	13	8.8422	7	16	20	2	11	7.3685	10.3159	10.3159	13	7	6	11	16.2107	13.2633	16	9	4	11	8	11	9	7.3685	5	10	10.3159
mmu-miR-365	MIMAT0000711	nmiR01326.1:1	Endogenous1	399	189	107.797	43	355.73	21.5594	45	4	3	262	180	368	878	724	118.577	97.0173	393	187	510	147	107.797	24	101	363	20	616	53.8985	204.814	107.797	230	199	74	209	129.356	107.797	422	383	37	338	8	302	288	43.1188	241	287	86.2376
mmu-miR-367	MIMAT0003181	nmiR01327.1:1	Endogenous1	27	32	33.5231	22	28.4947	25.1423	61	20	17	24	96	24	59	63	30.1708	28.4947	44	20	52	37	28.4947	25	41	59	5	27	16.7616	45.2562	25.1423	28	26	28	23	36.8754	45.2562	61	29	11	17	20	59	39	31.847	78	47	26.8185
mmu-miR-369-3p	MIMAT0003186	nmiR01328.1:1	Endogenous1	179	160	26.1758	85	49.0796	24.5398	117	14	12	99	163	16	459	239	29.4478	21.2678	317	126	263	92	14.7239	36	74	169	5	224	16.3599	27.8118	11.4519	82	59	54	104	22.9038	17.9959	107	134	33	133	11	94	86	17.9959	117	106	27.8118
mmu-miR-369-5p	MIMAT0003185	nmiR01329.1:1	Endogenous1	25	21	13.281	9	14.7567	11.8053	16	12	5	15	35	12	42	32	10.3297	17.708	24	16	35	18	14.7567	14	14	32	3	37	14.7567	13.281	11.8053	7	7	13	14	7.37834	10.3297	21	9	11	12	9	23	21	17.708	10	22	16.2323
mmu-miR-370	MIMAT0001095	nmiR01330.1:1	Endogenous1	17	25	38.9664	44	74.8155	17.1452	39	26	23	21	58	30	70	69	38.9664	29.6145	42	24	61	41	23.3798	31	73	57	7	26	32.7318	37.4077	46.7597	52	24	22	13	45.201	31.1731	42	27	28	37	13	37	27	24.9385	39	35	35.8491
mmu-miR-374	MIMAT0003727	nmiR01331.1:1	Endogenous1	96	54	61.2491	60	71.9011	58.5861	41	33	32	91	76	110	226	225	74.5641	95.8681	129	74	199	65	71.9011	33	88	193	16	124	31.956	71.9011	79.8901	126	61	37	71	95.8681	74.5641	194	125	31	133	22	115	105	71.9011	96	209	95.8681
mmu-miR-375	MIMAT0000739	nmiR01332.1:1	Endogenous1	42	40	39.502	40	61.7219	9.8755	41	21	12	15	129	26	176	172	17.2821	27.1576	152	78	144	40	34.5643	90	51	86	1	199	9.8755	19.751	32.0954	36	28	49	119	29.6265	22.2199	31	90	16	79	12	45	65	22.2199	16	12	27.1576
mmu-miR-376a	MIMAT0000740	nmiR01333.1:1	Endogenous1	681	360	110.212	34	520.444	67.3516	252	8	9	364	905	177	783	587	61.2287	85.7202	420	175	1338	1026	55.1058	26	161	366	29	289	42.8601	214.3	91.8431	491	418	38	90	91.8431	73.4744	1274	540	54	456	7	520	147	61.2287	869	618	55.1058
mmu-miR-376b	MIMAT0001092	nmiR01334.1:1	Endogenous1	229	125	14.627	52	9.14185	7.31348	40	12	8	89	89	18	165	164	16.4553	14.627	117	44	138	60	16.4553	17	39	111	9	132	14.627	16.4553	20.1121	52	44	19	42	14.627	23.7688	103	51	19	84	10	59	62	18.2837	60	95	21.9405
mmu-miR-376c	MIMAT0003183	nmiR01335.1:1	Endogenous1	293	160	48.6316	98	53.4947	14.5895	150	27	28	211	156	43	551	478	51.0632	21.8842	407	199	279	104	51.0632	49	107	269	14	313	41.3369	53.4947	21.8842	140	114	111	292	43.7684	46.2	262	211	58	229	11	117	187	46.2	163	223	51.0632
mmu-miR-377	MIMAT0000741	nmiR01336.1:1	Endogenous1	756	804	79.9678	90	1042.66	156.86	198	238	178	451	1021	153	1169	882	181.465	233.752	767	400	721	422	799.678	27	200	601	19	758	169.163	95.3462	369.082	318	325	130	292	233.752	212.222	629	300	58	292	15	351	283	402.915	282	460	123.027
mmu-miR-378	MIMAT0003151	nmiR01337.1:1	Endogenous1	131	132	54.9989	50	89.3732	27.4994	47	22	17	121	328	102	251	268	44.6866	30.9369	176	120	181	85	79.0609	42	74	176	13	135	37.8117	75.6235	37.8117	117	94	71	158	30.9369	44.6866	128	105	28	118	4	136	126	37.8117	105	167	24.062
mmu-miR-379	MIMAT0000743	nmiR01338.1:1	Endogenous1	134	69	31.014	24	31.014	35.7854	23	19	16	59	154	29	216	237	35.7854	28.6283	130	53	125	59	16.6998	12	49	133	6	133	26.2426	31.014	26.2426	52	40	21	37	33.3997	28.6283	95	42	18	63	13	64	54	28.6283	42	64	38.171
mmu-miR-380-3p	MIMAT0000745	nmiR01339.1:1	Endogenous1	22	10	21.7686	19	23.7476	13.8528	20	14	13	14	324	12	47	54	23.7476	25.7266	17	14	29	14	11.8738	14	30	58	4	11	15.8317	19.7897	17.8107	18	10	14	24	25.7266	19.7897	16	15	12	12	14	44	12	25.7266	13	29	17.8107
mmu-miR-380-5p	MIMAT0000744	nmiR01340.1:1	Endogenous1	15	9	12.6103	9	5.60456	8.40684	9	15	11	11	21	8	22	18	14.0114	18.2148	19	7	27	12	11.2091	11	18	16	2	14	16.8137	18.2148	12.6103	19	9	11	7	11.2091	8.40684	10	6	9	8	11	14	9	5.60456	14	17	5.60456
mmu-miR-381	MIMAT0000746	nmiR01341.2:2	Endogenous1	64	40	16.1297	57	10.7531	17.9219	48	7	10	50	147	19	145	109	14.3375	21.5063	73	42	61	27	16.1297	29	30	83	7	70	17.9219	25.0907	1.79219	29	20	16	43	7.16876	7.16876	57	34	27	46	10	58	32	16.1297	31	29	28.6751
mmu-miR-382	MIMAT0000747	nmiR01342.1:1	Endogenous1	196	99	40.2755	123	25.3586	14.9168	119	32	23	116	181	27	298	312	19.3919	28.342	199	121	167	65	23.8669	54	91	158	8	213	25.3586	38.7838	41.7672	92	73	61	150	31.3254	25.3586	114	119	57	166	15	76	108	25.3586	65	69	29.8337
mmu-miR-383	MIMAT0000748	nmiR01343.1:1	Endogenous1	10	13	26.774	13	31.642	17.038	20	11	10	6	62	16	48	64	17.038	17.038	14	12	32	18	14.604	15	45	78	9	16	19.472	46.2461	21.906	13	12	12	12	26.774	19.472	18	12	8	15	3	67	11	14.604	19	16	21.906
mmu-miR-384-3p	MIMAT0001076	nmiR01344.1:1	Endogenous1	13	21	41.9491	26	45.4449	26.2182	27	14	19	33	75	35	66	82	24.4703	47.1928	34	25	50	35	33.2097	26	58	64	16	11	27.9661	52.4364	29.714	42	35	25	18	41.9491	45.4449	45	37	11	30	12	48	20	34.9576	28	45	50.6885
mmu-miR-384-5p	MIMAT0004745	nmiR01345.1:1	Endogenous1	19	12	16.5398	14	24.1735	3.81687	9	12	6	13	22	20	17	18	12.7229	15.2675	15	12	40	18	7.63374	13	15	20	2	10	10.1783	13.9952	6.36145	18	8	10	8	22.9012	15.2675	14	12	12	12	8	9	10	20.3566	15	21	26.7181
mmu-miR-409-3p	MIMAT0001090	nmiR01346.1:1	Endogenous1	22	16	11.3597	7	7.09979	7.09979	4	4	8	10	15	7	22	23	15.6195	11.3597	17	12	16	18	9.9397	8	10	25	3	17	8.51975	17.0395	8.51975	17	2	8	6	11.3597	9.9397	21	16	3	12	7	23	7	9.9397	7	8	17.0395
mmu-miR-409-5p	MIMAT0004746	nmiR01347.1:1	Endogenous1	45	48	16.3243	29	22.4459	18.3648	33	14	16	48	70	23	131	115	30.608	22.4459	90	43	76	33	36.7296	25	43	85	6	77	14.2837	28.5675	26.5269	45	27	27	70	20.4053	32.6485	58	42	15	34	10	31	42	32.6485	25	43	32.6485
mmu-miR-410	MIMAT0001091	nmiR01348.2:2	Endogenous1	191	81	13.4012	64	22.3353	14.8902	76	7	13	114	87	22	247	241	11.9122	14.8902	90	53	143	41	13.4012	32	51	88	5	115	14.8902	13.4012	16.3792	60	36	18	46	13.4012	20.8463	116	57	23	145	10	68	47	14.8902	70	98	11.9122
mmu-miR-411	MIMAT0004747	nmiR01349.2:2	Endogenous1	70	43	17.4315	55	22.1855	6.33872	76	13	18	44	55	12	114	138	19.0162	22.1855	83	58	82	26	12.6774	34	39	67	5	61	9.50808	12.6774	19.0162	22	21	46	66	7.9234	15.8468	48	38	13	54	7	27	25	15.8468	31	49	3.16936
mmu-miR-412	MIMAT0001094	nmiR01350.1:1	Endogenous1	6	10	3.635	4	7.27	7.27	7	3	5	6	8	9	19	14	16.3575	1.8175	10	4	17	9	9.08749	6	16	19	2	16	7.27	7.27	18.175	8	6	12	7	12.7225	3.635	10	3	3	10	6	14	6	10.905	5	8	3.635
mmu-miR-421	MIMAT0004869	nmiR01351.1:1	Endogenous1	51	34	37.3816	15	31.6306	17.253	27	6	2	59	47	38	69	75	8.62652	23.004	44	21	83	48	14.3775	15	28	52	8	58	34.5061	51.7591	17.253	29	22	22	27	23.004	14.3775	63	34	16	41	6	37	29	31.6306	41	73	28.7551
mmu-miR-423-3p	MIMAT0003454	nmiR01352.1:1	Endogenous1	142	102	80.1782	32	104.848	49.3404	47	32	33	118	117	75	298	317	77.0944	58.5918	215	94	199	61	95.5971	36	98	204	14	306	83.262	107.932	107.932	113	115	36	75	104.848	77.0944	214	117	21	95	10	110	122	92.5133	67	164	61.6755
mmu-miR-423-5p	MIMAT0004825	nmiR01353.1:1	Endogenous1	97	100	80.2309	25	62.7894	20.9298	48	15	12	65	45	54	192	127	27.9064	45.3479	86	42	123	66	59.3011	16	49	100	4	146	45.3479	45.3479	59.3011	62	77	13	56	52.3245	48.8362	174	96	23	72	11	87	60	62.7894	117	96	27.9064
mmu-miR-425	MIMAT0004750	nmiR01354.1:1	Endogenous1	65	49	63.3508	34	63.3508	31.6754	37	13	20	63	84	61	162	142	31.6754	34.8429	152	89	99	43	63.3508	26	63	108	14	122	34.8429	50.6806	66.5184	71	66	51	110	34.8429	44.3456	117	63	29	84	7	55	95	25.3403	67	97	41.178
mmu-miR-429	MIMAT0001537	nmiR01355.1:1	Endogenous1	807	553	55.2209	194	130.164	51.2765	220	16	12	612	344	335	2185	1875	63.1096	67.0539	781	405	852	253	39.4435	58	269	829	38	872	55.2209	102.553	78.887	540	554	151	481	51.2765	74.9426	1284	695	99	703	11	452	689	55.2209	642	962	70.9983
mmu-miR-431	MIMAT0001418	nmiR01356.1:1	Endogenous1	124	127	19.3558	44	27.0982	15.4847	40	16	10	69	128	22	175	183	29.0338	32.9049	120	70	134	43	19.3558	23	52	86	9	100	29.0338	40.6473	21.2914	72	55	31	50	30.9693	34.8405	92	67	15	58	10	58	35	23.227	61	71	25.1626
mmu-miR-432	MIMAT0012771	nmiR01357.1:1	Endogenous1	6	9	9.98477	9	7.13198	5.70558	10	9	5	10	16	10	16	15	14.264	8.55837	7	5	18	5	5.70558	10	8	16	1	16	15.6904	9.98477	11.4112	8	12	11	6	12.8376	8.55837	16	8	10	8	12	12	7	5.70558	7	10	7.13198
mmu-miR-433	MIMAT0001420	nmiR01358.1:1	Endogenous1	196	134	30.1979	60	38.2506	12.0792	72	15	10	129	172	23	282	270	16.1055	18.1187	201	148	171	69	20.1319	22	54	157	13	189	24.1583	36.2375	26.1715	92	47	52	102	28.1847	20.1319	108	101	33	122	16	60	93	14.0923	73	96	22.1451
mmu-miR-434-3p	MIMAT0001422	nmiR01359.1:1	Endogenous1	295	186	37.3083	39	69.9531	13.9906	49	6	8	231	175	14	481	392	32.6448	37.3083	290	148	244	71	9.32708	24	65	198	4	271	18.6542	41.9719	23.3177	116	91	38	107	27.9813	13.9906	212	141	23	108	7	96	111	23.3177	82	163	27.9813
mmu-miR-434-5p	MIMAT0001421	nmiR01360.1:1	Endogenous1	63	43	6.64602	19	17.7227	4.43068	20	7	7	47	37	8	105	85	15.5074	17.7227	55	30	47	15	8.86136	10	12	51	1	60	8.86136	17.7227	2.21534	18	14	22	23	11.0767	26.5841	38	33	11	39	3	19	16	22.1534	20	33	15.5074
mmu-miR-448	MIMAT0001533	nmiR01361.1:1	Endogenous1	14	19	33.7494	23	26.9995	21.5996	30	21	26	15	47	21	61	55	22.9496	25.6496	26	15	39	23	24.2996	21	76	45	17	21	16.1997	29.6995	31.0495	26	20	16	14	44.5492	32.3995	33	17	17	21	8	32	16	21.5996	31	35	28.3495
mmu-miR-449a	MIMAT0001542	nmiR01362.1:1	Endogenous1	280	124	52.4928	94	56.2423	33.7454	115	15	20	61	83	59	1019	901	33.7454	41.2443	94	24	217	50	74.9897	39	107	257	6	363	18.7474	41.2443	44.9938	36	58	17	63	56.2423	37.4949	161	126	15	65	9	147	276	33.7454	36	54	33.7454
mmu-miR-449b	MIMAT0005447	nmiR01363.1:1	Endogenous1	17	8	13.394	8	10.4175	7.44109	11	12	5	8	15	15	14	29	11.9057	11.9057	12	14	17	13	8.92931	12	14	28	8	5	10.4175	19.3468	8.92931	13	3	12	10	5.95287	11.9057	8	7	5	4	10	17	11	16.3704	9	12	8.92931
mmu-miR-449c	MIMAT0003460	nmiR01364.2:2	Endogenous1	13	10	2.88483	10	8.6545	8.6545	9	7	4	2	9	12	28	27	8.6545	7.21208	7	2	16	8	14.4242	7	8	13	3	8	8.6545	10.0969	15.8666	7	1	10	5	7.21208	12.9817	12	6	10	7	6	12	11	8.6545	7	7	8.6545
mmu-miR-450a-3p	MIMAT0004789	nmiR01365.1:1	Endogenous1	16	14	1.76654	7	14.1324	5.29963	16	10	5	11	9	17	30	28	14.1324	7.06618	14	11	27	7	5.29963	6	10	28	1	23	14.1324	7.06618	7.06618	14	11	8	11	15.8989	8.83272	23	18	8	24	4	21	10	5.29963	16	16	10.5993
mmu-miR-450a-5p	MIMAT0001546	nmiR01366.1:1	Endogenous1	1128	362	53.1924	191	141.846	21.277	206	12	8	682	192	253	1726	1418	31.9155	31.9155	790	287	1088	303	21.277	69	223	682	21	1095	28.3693	46.1001	28.3693	384	300	126	385	28.3693	24.8231	1202	778	127	1256	3	393	343	17.7308	641	912	10.6385
mmu-miR-450b-3p	MIMAT0003512	nmiR01367.1:1	Endogenous1	93	83	46.8907	16	40.6386	43.7647	20	12	10	49	71	24	192	135	43.7647	21.8823	163	83	152	65	46.8907	24	30	103	8	139	40.6386	53.1428	46.8907	54	55	28	75	34.3865	46.8907	91	90	9	75	11	50	55	37.5126	81	62	50.0168
mmu-miR-450b-5p	MIMAT0003511	nmiR01368.1:1	Endogenous1	16	20	23.9598	10	21.9631	15.9732	50	8	5	16	45	18	33	34	25.9564	17.9698	47	30	58	42	15.9732	14	18	22	3	22	7.9866	29.9497	11.9799	30	30	14	24	11.9799	17.9698	70	25	7	15	8	30	29	7.9866	26	40	9.98325
mmu-miR-451	MIMAT0001632	nmiR01369.1:1	Endogenous1	686	281	209.579	490	222.28	114.316	579	13	25	176	273	396	3867	3382	76.2104	69.8595	3119	1676	184	74	69.8595	186	451	1033	18	186	57.1578	196.877	44.4561	99	65	827	2099	44.4561	82.5612	1002	622	129	1260	14	164	260	76.2104	2230	3675	114.316
mmu-miR-452	MIMAT0001637	nmiR01370.1:1	Endogenous1	15	25	21.0738	15	9.72638	11.3474	18	6	8	18	18	19	22	34	14.5896	12.9685	27	21	22	17	32.4213	14	22	20	1	15	12.9685	21.0738	34.0423	14	6	7	20	25.937	12.9685	22	13	10	7	6	21	20	19.4528	16	13	14.5896
mmu-miR-453	MIMAT0004870	nmiR01371.1:1	Endogenous1	7	13	17.3165	12	14.6525	10.6563	12	4	12	13	20	14	19	22	10.6563	10.6563	10	8	25	11	15.9845	16	14	22	5	5	15.9845	6.66021	15.9845	16	6	11	18	6.66021	9.32429	22	13	13	9	5	13	12	7.99225	15	12	13.3204
mmu-miR-455	MIMAT0003742	nmiR01372.1:1	Endogenous1	39	29	40.9516	12	38.0265	29.2511	25	11	12	26	44	21	94	82	26.326	17.5507	61	41	85	37	38.0265	18	27	63	5	89	26.326	23.4009	38.0265	34	45	19	31	35.1014	32.1762	84	37	10	32	11	60	32	8.77534	56	64	29.2511
mmu-miR-463	MIMAT0004758	nmiR01373.1:1	Endogenous1	10	16	12.0521	7	12.0521	21.0911	11	11	10	17	31	9	29	26	21.0911	6.02604	8	8	14	10	18.0781	11	11	24	5	9	10.5456	16.5716	9.03906	18	9	7	8	12.0521	12.0521	26	9	11	7	7	21	17	12.0521	10	22	13.5586
mmu-miR-464	MIMAT0002105	nmiR01374.1:1	Endogenous1	6	8	6.90099	7	8.28119	4.14059	9	9	9	8	34	11	15	14	8.28119	8.28119	8	6	10	4	5.52079	8	8	15	1	7	11.0416	6.90099	2.7604	9	1	12	6	15.1822	2.7604	5	11	12	5	6	8	11	6.90099	14	7	15.1822
mmu-miR-465a-3p	MIMAT0004217	nmiR01375.2:2	Endogenous1	3	12	17.6842	15	22.4	16.5053	19	22	11	9	33	17	20	42	21.221	11.7895	19	8	22	10	15.3263	12	26	28	9	12	22.4	20.0421	16.5053	15	11	10	8	22.4	20.0421	17	10	11	10	7	15	8	20.0421	22	12	15.3263
mmu-miR-465a-5p	MIMAT0002106	nmiR01376.1:1	Endogenous1	9	13	8.65622	13	10.3875	13.8499	11	12	6	12	33	15	25	36	25.9686	8.65622	14	13	20	23	29.4311	13	28	26	4	11	15.5812	12.1187	19.0437	16	7	11	9	12.1187	15.5812	27	19	7	16	6	17	12	22.5062	14	14	8.65622
mmu-miR-465b-5p	MIMAT0004871	nmiR01377.1:1	Endogenous1	7	11	14.1447	12	12.7303	15.5592	15	10	11	16	24	19	22	39	15.5592	22.6316	15	15	28	9	11.3158	11	21	28	2	9	9.90131	16.9737	14.1447	15	5	7	18	18.3882	12.7303	10	17	14	7	8	27	9	12.7303	6	9	11.3158
mmu-miR-465c-5p	MIMAT0004873	nmiR01378.1:1	Endogenous1	25	42	41.1573	10	50.3033	38.8708	23	11	15	25	311	33	79	74	54.8764	45.7303	35	17	49	47	22.8652	21	63	85	9	36	27.4382	32.0112	50.3033	29	19	14	15	22.8652	22.8652	36	27	14	24	17	73	18	36.5842	27	33	41.1573
mmu-miR-466a-3p+mmu-miR-466b-3-3p	MIMAT0002107	nmiR01379.1:1	Endogenous1	40	24	28.4793	37	20.3424	24.4108	30	12	9	34	95	38	79	84	20.3424	26.4451	44	40	61	20	16.2739	27	25	66	4	47	20.3424	28.4793	18.3081	43	24	37	49	20.3424	24.4108	80	48	23	66	8	46	44	34.582	38	67	30.5135
mmu-miR-466a-5p+mmu-miR-466e-5p	MIMAT0004759	nmiR01380.1:1	Endogenous1	26	34	42.8494	25	51.0112	16.3236	19	12	15	25	65	18	66	83	18.364	22.4449	53	26	36	36	20.4045	23	35	77	5	24	18.364	59.173	20.4045	37	27	20	37	18.364	38.7685	37	28	19	37	9	61	28	38.7685	20	34	28.5663
mmu-miR-466c-5p	MIMAT0004877	nmiR01382.1:1	Endogenous1	10	7	4.11527	9	12.3458	4.11527	12	5	2	10	16	4	25	16	16.4611	12.3458	12	9	17	8	4.11527	10	11	22	1	19	16.4611	14.4035	12.3458	9	13	12	9	6.17291	4.11527	13	8	5	8	9	28	15	8.23055	6	11	20.5764
mmu-miR-466d-3p	MIMAT0004931	nmiR01383.1:1	Endogenous1	23	13	17.8354	15	29.7257	11.8903	17	11	11	19	38	19	30	27	7.92685	19.8171	32	19	32	20	21.7988	11	20	29	4	22	17.8354	21.7988	11.8903	19	9	11	20	21.7988	19.8171	26	17	9	20	6	25	10	15.8537	14	25	9.90856
mmu-miR-466d-5p	MIMAT0004930	nmiR01384.1:1	Endogenous1	12	13	37.7531	19	34.4702	21.3387	21	13	20	20	38	18	32	44	19.6973	14.7729	23	15	31	20	13.1315	17	47	34	5	14	24.6216	36.1116	24.6216	21	16	9	12	26.263	32.8288	27	18	13	22	6	20	11	27.9045	24	17	13.1315
mmu-miR-466f-5p	MIMAT0004881	nmiR01386.1:1	Endogenous1	10	11	8.41244	13	9.81451	7.01037	10	8	7	13	10	12	21	23	12.6187	14.0207	19	6	15	13	14.0207	8	9	26	3	12	9.81451	9.81451	21.0311	13	5	7	7	14.0207	11.2166	9	10	15	15	4	19	8	12.6187	9	18	14.0207
mmu-miR-466g	MIMAT0004883	nmiR01387.1:1	Endogenous1	378	382	210.699	40	503.622	66.8069	90	65	54	280	508	273	255	274	87.3629	118.197	254	154	325	296	313.479	27	121	249	18	342	149.031	128.475	195.282	262	213	119	179	107.919	92.5019	381	183	66	166	15	247	256	123.336	226	274	61.668
mmu-miR-466h	MIMAT0004884	nmiR01388.1:1	Endogenous1	4	13	10.8462	18	27.8901	7.74725	16	6	2	21	20	19	31	55	21.6923	15.4945	20	15	23	28	18.5934	15	21	36	4	13	10.8462	26.3407	20.1429	22	10	11	12	12.3956	23.2418	15	15	12	9	9	30	9	18.5934	13	18	20.1429
mmu-miR-466i	MIMAT0005834	nmiR01389.1:1	Endogenous1	23	30	28.2885	29	29.4672	21.2164	15	21	13	24	26	19	29	27	25.9312	18.859	26	20	48	33	17.6803	22	28	27	7	14	20.0377	15.323	14.1443	15	13	17	24	35.3607	22.3951	20	23	16	23	23	25	18	24.7525	16	25	24.7525
mmu-miR-466j	MIMAT0005848	nmiR01390.1:1	Endogenous1	17	14	22.5526	19	23.8792	10.613	15	11	5	15	22	20	29	44	18.5727	15.9195	17	18	30	25	17.2461	13	26	33	3	5	14.5928	26.5325	19.8993	20	8	15	16	15.9195	23.8792	21	14	18	9	14	23	12	13.2662	21	18	9.28636
mmu-miR-466k	MIMAT0005845	nmiR01391.1:1	Endogenous1	8	22	27.3074	17	18.2049	20.4806	20	9	6	19	257	12	51	32	20.4806	9.10247	18	15	36	16	15.9293	23	18	34	7	24	18.2049	34.1343	20.4806	19	12	13	16	31.8586	15.9293	21	11	12	13	11	28	14	18.2049	15	25	13.6537
mmu-miR-466l	MIMAT0005830	nmiR01392.1:1	Endogenous1	19	14	24.4753	17	18.3565	10.198	9	6	9	13	60	19	45	36	22.4357	14.2773	15	6	36	25	26.5149	7	18	44	3	23	12.2377	22.4357	20.3961	10	5	8	14	12.2377	22.4357	24	18	5	13	7	33	8	18.3565	11	11	16.3169
mmu-miR-467a	MIMAT0003409	nmiR01393.1:1	Endogenous1	21	21	35.1172	25	53.5119	46.8229	32	27	35	24	197	26	107	118	31.7727	33.445	25	14	39	31	33.445	17	91	88	13	18	26.756	58.5287	43.4784	26	30	18	25	43.4784	31.7727	54	32	28	39	20	70	24	40.1339	25	29	56.8564
mmu-miR-467b	MIMAT0005448	nmiR01394.1:1	Endogenous1	18	23	38.7083	13	19.3541	16.9349	13	13	5	28	73	26	60	62	19.3541	19.3541	47	30	27	23	12.0963	11	40	49	7	24	24.1927	48.3853	21.7734	26	15	19	23	36.289	19.3541	26	28	9	20	13	40	35	29.0312	22	26	16.9349
mmu-miR-467c	MIMAT0004885	nmiR01395.1:1	Endogenous1	12	18	29.397	5	20.2104	14.6985	15	11	12	13	77	16	48	32	14.6985	25.7223	15	13	27	18	16.5358	11	39	43	1	24	22.0477	23.885	12.8612	20	7	10	12	31.2343	22.0477	20	20	7	15	8	31	12	22.0477	19	15	22.0477
mmu-miR-467d	MIMAT0004886	nmiR01396.1:1	Endogenous1	18	8	11.914	16	16.2464	10.8309	16	14	13	13	21	11	11	21	16.2464	17.3295	15	13	23	19	9.74784	11	15	22	6	6	11.914	18.4126	16.2464	15	5	17	8	15.1633	22.745	15	9	9	14	5	13	13	9.74784	12	9	11.914
mmu-miR-467e	MIMAT0005293	nmiR01397.1:1	Endogenous1	22	43	4.65408	32	27.9245	27.9245	18	11	13	24	91	23	71	78	32.5786	23.2704	35	17	51	31	16.2893	17	38	71	4	25	53.5219	32.5786	25.5974	35	16	14	24	32.5786	25.5974	47	36	15	22	9	54	14	23.2704	35	45	48.8679
mmu-miR-467f	MIMAT0005846	nmiR01398.1:1	Endogenous1	28	23	12.2875	14	27.0325	12.2875	15	4	9	30	33	26	54	51	17.2025	29.49	43	32	49	25	12.2875	9	24	48	3	28	19.66	39.32	17.2025	12	21	16	17	24.575	29.49	46	33	10	23	9	26	25	14.745	33	35	24.575
mmu-miR-467g	MIMAT0005854	nmiR01399.1:1	Endogenous1	7	15	13.4719	10	8.98129	7.48441	10	4	8	10	21	15	21	19	17.9626	16.4657	15	7	22	12	10.4782	12	20	17	2	14	13.4719	20.9564	7.48441	9	5	12	17	13.4719	7.48441	18	9	14	9	5	16	14	5.98753	19	22	8.98129
mmu-miR-467h+mmu-miR-669d+mmu-miR-669l	MIMAT0005855	nmiR01400.1:1	Endogenous1	14	22	39.8585	27	16.7149	16.7149	21	25	38	17	44	19	60	65	23.1437	29.5724	21	13	43	26	41.1443	27	70	53	9	14	20.5721	41.1443	33.4297	26	14	23	12	36.0012	33.4297	52	25	16	23	18	30	15	30.8582	36	40	28.2867
mmu-miR-468	MIMAT0002109	nmiR01401.1:1	Endogenous1	26	20	38.2168	30	33.2856	29.5872	35	24	35	24	58	28	60	58	39.4496	24.656	36	21	53	38	28.3544	32	76	62	15	15	36.984	35.7512	41.9152	32	25	15	18	50.5448	32.0528	41	24	31	30	16	39	21	27.1216	27	34	38.2168
mmu-miR-469	MIMAT0002110	nmiR01402.1:1	Endogenous1	12	16	15.5842	12	26.9181	14.1674	14	11	13	17	36	22	22	33	25.5014	22.6679	22	16	24	15	11.3339	11	22	26	8	8	22.6679	21.2511	21.2511	19	5	20	12	24.0846	22.6679	24	16	9	11	13	25	16	12.7507	20	16	17.0009
mmu-miR-470	MIMAT0002111	nmiR01403.1:1	Endogenous1	10	2	8.13187	18	11.3846	6.50549	14	3	5	18	8	7	23	24	11.3846	21.1429	10	8	15	13	9.75824	4	19	10	3	12	9.75824	8.13187	16.2637	13	6	8	7	13.011	8.13187	12	13	8	9	6	16	7	16.2637	7	14	17.8901
mmu-miR-471	MIMAT0002112	nmiR01404.1:1	Endogenous1	17	18	26.2089	26	22.2775	15.7253	18	15	23	24	76	26	31	62	27.5193	23.588	24	13	41	19	23.588	20	16	36	8	19	20.9671	43.2446	34.0715	26	13	22	24	28.8297	23.588	31	23	19	17	11	33	15	15.7253	19	15	24.8984
mmu-miR-483	MIMAT0004782	nmiR01405.1:1	Endogenous1	7	8	9.07472	15	9.07472	4.53736	8	7	3	14	16	10	26	26	12.0996	12.0996	11	5	33	10	16.637	16	9	18	1	12	16.637	18.1494	4.53736	15	8	17	7	15.1245	9.07472	22	10	3	5	2	15	7	10.5872	11	14	9.07472
mmu-miR-484	MIMAT0003127	nmiR01406.1:1	Endogenous1	92	59	40.1957	10	31.2633	22.3309	14	5	6	61	33	39	142	112	26.7971	17.8648	68	32	118	54	40.1957	8	23	85	2	109	58.0605	31.2633	13.3986	39	37	15	32	35.7295	22.3309	121	95	7	60	8	45	57	4.46619	47	97	22.3309
mmu-miR-485	MIMAT0003128	nmiR01407.2:2	Endogenous1	14	17	35.6474	26	25.8136	30.7305	35	18	26	14	40	25	41	65	29.5013	19.6675	35	16	51	37	27.0429	31	46	52	14	17	35.6474	22.126	34.4182	36	12	14	14	31.9597	35.6474	37	18	19	33	9	36	13	43.0227	20	29	27.0429
mmu-miR-486	MIMAT0003130	nmiR01408.1:1	Endogenous1	47	40	35.9417	45	52.5302	27.6474	55	8	20	8	29	39	178	153	16.5885	27.6474	101	85	35	18	30.4122	25	28	62	5	19	11.059	35.9417	27.6474	28	16	40	87	16.5885	19.3532	67	51	23	45	8	25	16	22.118	139	168	38.7064
mmu-miR-487b	MIMAT0003184	nmiR01409.1:1	Endogenous1	39	16	6.62984	17	13.2597	9.94476	21	6	13	27	31	11	73	79	18.2321	16.5746	51	17	70	19	19.8895	7	23	39	4	37	14.9171	16.5746	6.62984	17	9	11	15	18.2321	14.9171	44	24	9	18	5	20	29	16.5746	14	28	9.94476
mmu-miR-488	MIMAT0003450	nmiR01410.1:1	Endogenous1	22	26	38.3091	10	30.6473	38.3091	12	10	11	25	99	28	84	110	30.6473	48.5248	27	23	56	34	33.2012	18	47	110	20	16	25.5394	38.3091	20.4315	32	16	18	18	28.0933	35.7551	28	38	9	24	15	75	24	28.0933	11	32	33.2012
mmu-miR-489	MIMAT0003112	nmiR01411.1:1	Endogenous1	20	24	47.0114	18	19.3576	30.4192	13	10	5	21	206	25	84	63	30.4192	47.0114	29	12	57	76	33.1845	16	41	64	5	20	33.1845	60.8383	27.6538	31	19	15	7	44.2461	27.6538	44	25	11	18	11	81	19	30.4192	30	27	30.4192
mmu-miR-490	MIMAT0003780	nmiR01412.1:1	Endogenous1	19	17	25.8735	11	24.2564	16.171	18	18	12	18	41	15	23	28	22.6393	14.5539	22	17	56	23	25.8735	24	15	23	4	15	12.9368	27.4906	16.171	28	21	13	11	19.4052	21.0223	39	21	14	14	13	12	15	17.7881	24	31	21.0223
mmu-miR-491	MIMAT0003486	nmiR01413.1:1	Endogenous1	10	12	12.3599	10	7.06281	7.06281	7	4	4	8	16	6	18	8	7.06281	10.5942	8	4	17	5	10.5942	10	16	10	4	11	10.5942	8.82851	5.29711	9	6	9	5	3.5314	8.82851	13	11	3	1	5	6	8	7.06281	9	7	8.82851
mmu-miR-493	MIMAT0004888	nmiR01414.1:1	Endogenous1	19	42	34.9939	45	39.0317	37.6858	50	23	39	22	85	35	82	104	40.3776	39.0317	35	30	60	41	57.8746	41	96	66	19	25	41.7236	43.0695	53.8368	44	30	24	18	53.8368	57.8746	50	38	39	43	19	56	22	48.4532	35	45	26.9184
mmu-miR-494	MIMAT0003182	nmiR01415.1:1	Endogenous1	28	13	36.0605	13	15.6785	12.5428	9	8	3	16	24	15	33	27	21.9499	14.1106	27	13	34	10	14.1106	14	15	26	5	11	10.9749	10.9749	7.83925	16	5	14	19	10.9749	10.9749	22	8	7	8	6	19	7	18.8142	10	24	12.5428
mmu-miR-495	MIMAT0003456	nmiR01416.1:1	Endogenous1	50	20	13.4214	35	7.32076	8.54089	26	5	7	36	41	12	75	70	6.10064	9.76102	48	22	54	15	7.32076	11	23	48	2	43	13.4214	18.3019	4.88051	32	18	10	28	8.54089	10.9811	48	32	12	41	10	31	33	13.4214	21	48	9.76102
mmu-miR-496	MIMAT0003738	nmiR01417.1:1	Endogenous1	28	9	27.9196	16	44.6714	5.58392	12	2	7	29	33	16	62	95	5.58392	22.3357	43	22	30	12	25.1277	9	24	50	5	32	11.1678	19.5437	19.5437	7	16	4	31	11.1678	8.37589	24	24	5	18	2	28	25	8.37589	15	18	13.9598
mmu-miR-497	MIMAT0003453	nmiR01418.1:1	Endogenous1	54	29	81.1132	20	51.2294	34.1529	21	7	17	39	33	64	95	95	42.6912	38.422	59	28	107	39	38.422	16	32	77	8	145	72.575	46.9603	64.0367	39	50	15	38	55.4985	55.4985	122	54	14	63	4	84	47	38.422	58	87	46.9603
mmu-miR-499	MIMAT0003482	nmiR01419.1:1	Endogenous1	39	26	14.8757	26	19.8343	8.6775	41	15	18	34	39	19	56	54	12.3964	19.8343	57	32	114	36	24.7929	45	23	43	4	40	8.6775	19.8343	16.1154	45	33	11	23	11.1568	14.8757	78	40	28	37	10	24	31	19.8343	39	69	17.355
mmu-miR-500	MIMAT0003507	nmiR01420.1:1	Endogenous1	26	19	18.7043	13	21.8216	12.4695	25	17	7	27	32	27	33	34	18.7043	18.7043	20	15	65	16	20.263	20	20	45	9	32	29.6151	31.1738	20.263	23	15	13	13	10.9108	18.7043	53	27	11	22	6	35	16	29.6151	17	27	10.9108
mmu-miR-501-3p	MIMAT0003509	nmiR01421.1:1	Endogenous1	30	18	18.0998	18	24.133	4.02217	10	5	5	19	30	20	52	61	14.0776	14.0776	35	20	32	18	16.0887	10	18	39	1	37	20.1109	16.0887	8.04435	23	13	13	26	38.2106	12.0665	23	21	11	22	4	30	25	18.0998	7	15	10.0554
mmu-miR-501-5p	MIMAT0003508	nmiR01422.1:1	Endogenous1	18	18	34.9979	25	30.9597	14.8068	27	15	33	18	41	25	57	64	21.5372	18.845	32	18	37	19	39.0362	24	60	45	7	15	30.9597	36.344	34.9979	35	19	18	14	36.344	30.9597	43	18	30	27	12	30	13	29.6136	23	30	36.344
mmu-miR-503	MIMAT0003188	nmiR01423.1:1	Endogenous1	123	39	18.0383	33	46.3841	15.4614	21	14	15	51	51	20	195	171	18.0383	36.0766	115	40	116	40	28.3459	17	30	110	7	182	33.4997	30.9228	23.1921	39	60	39	63	23.1921	28.3459	89	40	14	55	9	84	85	41.2304	29	84	20.6152
mmu-miR-504	MIMAT0004889	nmiR01424.1:1	Endogenous1	11	18	29.0583	16	23.2466	27.1211	21	10	5	14	86	22	70	95	25.1839	25.1839	13	13	27	15	23.2466	25	44	86	10	17	32.9327	46.4933	9.6861	22	11	10	14	27.1211	17.435	22	9	15	10	6	72	16	23.2466	19	17	46.4933
mmu-miR-505	MIMAT0003513	nmiR01425.1:1	Endogenous1	7	10	5.22453	9	13.9321	13.9321	13	5	6	11	35	14	30	18	10.4491	15.6736	17	11	24	21	10.4491	9	17	34	3	16	10.4491	5.22453	12.1906	12	7	15	17	19.1566	20.8981	26	19	10	14	5	21	19	8.70755	15	13	24.3811
mmu-miR-509-3p	MIMAT0004891	nmiR01426.1:1	Endogenous1	13	20	19.7047	17	24.6308	27.915	13	7	19	13	97	18	45	55	26.2729	27.915	25	25	31	37	11.4944	18	37	60	9	16	31.1991	19.7047	22.9888	15	10	22	15	18.0626	18.0626	23	27	10	13	10	39	16	18.0626	25	25	31.1991
mmu-miR-509-5p	MIMAT0004890	nmiR01427.1:1	Endogenous1	13	10	7.51877	8	9.39846	18.7969	8	6	2	6	32	4	24	10	9.39846	5.63908	13	6	20	9	13.1578	12	15	25	1	14	15.0375	13.1578	5.63908	11	8	8	6	16.9172	5.63908	22	10	7	5	1	13	7	11.2782	13	15	9.39846
mmu-miR-511	MIMAT0004940	nmiR01428.1:1	Endogenous1	21	24	36.9461	10	23.0913	20.7822	20	7	10	38	18	28	51	91	36.9461	27.7096	40	30	38	34	13.8548	18	31	77	8	17	25.4005	39.2553	36.9461	36	11	13	15	18.4731	20.7822	36	30	7	17	14	39	16	20.7822	17	30	32.3279
mmu-miR-532-3p	MIMAT0004781	nmiR01429.1:1	Endogenous1	35	24	25.0814	16	20.5212	22.8013	24	11	10	28	35	27	50	54	20.5212	15.9609	36	31	58	29	11.4007	20	25	42	2	35	36.4821	36.4821	22.8013	41	27	14	22	29.6417	27.3616	71	28	16	23	10	30	26	31.9218	42	42	34.202
mmu-miR-532-5p	MIMAT0002889	nmiR01430.1:1	Endogenous1	116	99	38.2826	50	53.0067	58.8964	62	13	14	139	142	86	314	386	23.5585	44.1723	215	142	197	118	17.6689	47	113	308	38	161	32.393	64.786	38.2826	155	49	83	153	44.1723	32.393	185	139	44	124	47	158	106	44.1723	95	168	44.1723
mmu-miR-539	MIMAT0003169	nmiR01431.2:2	Endogenous1	68	79	35.3822	39	35.3822	26.5367	54	13	12	44	212	39	141	107	50.1248	47.1763	85	55	178	162	53.0733	15	44	76	6	61	44.2278	67.8159	23.5881	78	59	22	45	29.4852	35.3822	135	83	28	59	16	79	24	29.4852	106	81	58.9703
mmu-miR-540-3p	MIMAT0003167	nmiR01432.1:1	Endogenous1	6	11	8.23422	2	5.48948	5.48948	5	6	3	5	8	8	9	30	16.4684	6.86185	11	7	11	10	15.0961	15	14	26	5	7	15.0961	12.3513	9.60659	6	1	3	7	8.23422	8.23422	8	9	8	4	5	12	6	13.7237	7	6	15.0961
mmu-miR-540-5p	MIMAT0004786	nmiR01433.1:1	Endogenous1	14	14	11.3845	12	12.6495	3.79484	8	10	5	11	10	5	27	19	10.1196	17.7093	16	6	27	11	13.9144	18	6	21	2	10	13.9144	16.4443	16.4443	17	6	9	12	13.9144	15.1794	11	5	7	13	8	17	7	12.6495	13	13	17.7093
mmu-miR-541	MIMAT0003170	nmiR01434.1:1	Endogenous1	84	55	16.732	47	19.3061	9.00951	37	20	12	39	62	26	101	90	24.4544	24.4544	50	36	73	36	19.3061	29	32	67	7	63	19.3061	30.8898	19.3061	41	14	27	33	23.1673	25.7415	63	47	23	41	12	35	37	15.4449	29	52	16.732
mmu-miR-542-3p	MIMAT0003172	nmiR01435.2:2	Endogenous1	26	24	32.8001	19	14.7601	22.9601	23	13	11	21	33	22	102	60	26.2401	26.2401	45	25	54	15	32.8001	17	47	61	6	36	18.0401	29.5201	29.5201	39	26	12	13	39.3602	32.8001	45	35	23	30	8	27	20	41.0002	33	38	29.5201
mmu-miR-542-5p	MIMAT0003171	nmiR01436.1:1	Endogenous1	118	94	121.614	43	107.473	45.2519	46	47	36	76	167	65	274	245	50.9083	39.5954	192	124	161	74	96.1602	52	107	163	22	180	73.5343	87.6755	98.9884	130	88	93	162	93.3319	62.2213	194	118	37	138	20	118	105	76.3625	98	116	93.3319
mmu-miR-543	MIMAT0003168	nmiR01437.1:1	Endogenous1	1	1	2.41406	1	2.41406	2.41406	1	1	1	1	98	1	34	48	2.41406	2.41406	50	61	20	29	2.41406	1	1	1	1	1	2.41406	2.41406	2.41406	80	45	1	1	2.41406	2.41406	53	1	1	1	1	25	1	2.41406	1	49	2.41406
mmu-miR-544	MIMAT0004941	nmiR01438.1:1	Endogenous1	22	23	22.743	11	31.8402	25.0173	24	3	5	24	61	20	40	48	31.8402	4.5486	31	21	46	40	13.6458	7	22	37	6	24	13.6458	25.0173	13.6458	24	14	10	18	20.4687	15.9201	32	19	13	19	6	32	15	15.9201	28	30	29.5659
mmu-miR-546	MIMAT0003166	nmiR01439.1:1	Endogenous1	10	8	13.6344	7	22.724	9.0896	12	6	2	12	19	8	30	27	13.6344	13.6344	21	15	20	16	9.0896	8	10	17	3	12	9.0896	22.724	10.6045	20	7	13	11	13.6344	13.6344	16	9	7	13	9	20	8	9.0896	12	10	7.57467
mmu-miR-547	MIMAT0003173	nmiR01440.1:1	Endogenous1	24	26	21.1583	17	9.76536	17.9032	20	16	8	29	24	19	26	45	27.6685	30.9237	17	15	30	20	24.4134	7	29	37	9	12	17.9032	37.4339	14.648	20	17	20	29	26.041	19.5307	22	17	26	17	10	35	36	16.2756	31	31	32.5512
mmu-miR-551b	MIMAT0003890	nmiR01441.1:1	Endogenous1	26	28	40.5964	25	73.0736	54.8052	25	21	30	35	50	29	94	82	40.5964	26.3877	107	66	113	48	56.835	38	76	87	13	106	50.7456	69.014	52.7754	65	30	81	105	77.1332	44.6561	75	76	34	103	14	63	51	36.5368	81	62	50.7456
mmu-miR-568	MIMAT0004892	nmiR01442.1:1	Endogenous1	35	26	35.2751	31	39.6844	26.4563	29	28	24	32	51	29	41	56	17.6375	29.3959	29	25	43	36	32.3355	22	48	48	4	24	29.3959	57.322	32.3355	26	23	31	33	27.9261	42.624	25	31	23	18	21	45	27	38.2146	34	31	35.2751
mmu-miR-574-3p	MIMAT0004894	nmiR01443.1:1	Endogenous1	61	61	61.6024	45	53.5673	91.0645	51	24	26	59	82	61	127	130	42.8539	45.5322	108	60	168	60	50.889	23	72	98	19	156	56.2457	74.9943	69.6375	82	53	39	58	72.3159	48.2106	135	93	35	102	17	73	74	80.351	101	104	61.6024
mmu-miR-574-5p	MIMAT0004893	nmiR01444.1:1	Endogenous1	19	13	40.1091	31	28.2249	20.7973	35	23	20	19	41	27	57	54	23.7683	16.3407	36	25	53	17	31.1959	26	49	62	13	20	19.3118	35.6525	35.6525	32	24	24	30	22.2828	34.167	31	35	13	34	11	32	12	17.8263	35	24	28.2249
mmu-miR-582-3p	MIMAT0005292	nmiR01445.1:1	Endogenous1	8	10	24.0796	18	15.0497	16.5547	19	8	9	20	38	17	47	33	19.5646	21.0696	20	18	24	19	12.0398	16	22	24	5	20	18.0597	24.0796	16.5547	18	11	13	7	24.0796	18.0597	26	22	20	9	6	21	10	21.0696	13	24	25.5845
mmu-miR-582-5p	MIMAT0005291	nmiR01446.1:1	Endogenous1	56	32	50.0683	25	35.3423	20.6164	27	10	7	70	65	58	101	111	35.3423	32.3971	59	38	81	34	41.2327	15	46	88	10	66	26.5067	58.9039	41.2327	56	33	14	40	55.9587	35.3423	72	59	24	83	16	76	54	44.1779	58	71	20.6164
mmu-miR-590-3p	MIMAT0004896	nmiR01447.1:1	Endogenous1	12	7	12.2151	8	6.78616	5.42893	11	10	2	5	17	11	21	15	8.14339	12.2151	11	7	9	15	8.14339	12	9	11	1	6	12.2151	8.14339	5.42893	8	1	6	5	5.42893	14.9295	7	9	4	8	7	12	5	12.2151	10	13	8.14339
mmu-miR-590-5p	MIMAT0004895	nmiR01448.1:1	Endogenous1	6	10	20.3229	19	31.7546	34.2949	34	21	29	10	50	22	52	64	30.4844	29.2142	19	21	41	25	30.4844	17	51	57	16	16	15.2422	35.5651	26.6738	25	20	9	17	45.7266	30.4844	35	28	30	24	15	38	8	27.944	22	27	40.6459
mmu-miR-592	MIMAT0003730	nmiR01449.1:1	Endogenous1	9	16	25.6068	24	34.1424	29.0211	22	7	16	15	172	16	56	78	34.1424	15.3641	29	17	37	35	22.1926	31	45	62	12	15	18.7783	37.5567	27.3139	25	16	13	25	25.6068	35.8495	36	21	17	19	13	53	20	15.3641	30	32	42.678
mmu-miR-599	MIMAT0012772	nmiR01451.1:1	Endogenous1	8	12	15.3491	12	12.5583	11.1629	7	6	5	4	23	11	25	34	9.76758	15.3491	11	13	16	13	11.1629	6	12	30	4	11	9.76758	18.1398	15.3491	12	6	8	17	13.9537	15.3491	17	15	9	13	6	23	4	18.1398	11	12	8.37221
mmu-miR-615-3p	MIMAT0003783	nmiR01452.1:1	Endogenous1	6	8	15.3856	12	15.3856	6.83804	5	7	6	8	17	9	27	22	10.2571	11.9666	13	3	14	9	8.54755	12	13	22	3	12	23.9332	15.3856	6.83804	16	9	2	15	6.83804	8.54755	20	18	2	11	2	19	6	10.2571	13	8	8.54755
mmu-miR-615-5p	MIMAT0004837	nmiR01453.1:1	Endogenous1	8	2	11.6209	5	7.26305	5.81044	7	9	6	5	9	3	10	13	4.35783	10.1683	10	6	11	4	8.71566	11	8	13	1	4	14.5261	7.26305	7.26305	1	6	5	5	5.81044	11.6209	8	2	3	5	3	13	6	11.6209	3	8	8.71566
mmu-miR-652	MIMAT0003711	nmiR01454.1:1	Endogenous1	63	43	32.1301	31	32.1301	55.0801	28	4	8	55	78	66	146	149	27.5401	32.1301	104	66	107	29	27.5401	15	54	116	7	146	36.7201	27.5401	41.3101	63	54	73	112	32.1301	27.5401	109	46	23	71	8	94	85	27.5401	38	92	27.5401
mmu-miR-653	MIMAT0004943	nmiR01455.1:1	Endogenous1	13	20	17.4648	12	23.8156	7.93854	18	14	12	19	23	16	26	47	25.4033	20.6402	23	13	23	21	17.4648	15	20	31	5	18	17.4648	23.8156	20.6402	24	9	16	16	12.7017	12.7017	20	18	12	18	9	27	19	22.2279	14	20	19.0525
mmu-miR-654-3p	MIMAT0004898	nmiR01456.1:1	Endogenous1	12	19	18.2958	19	22.518	21.1106	18	9	14	15	37	16	33	31	15.4811	19.7032	17	17	24	19	12.6664	27	25	38	5	13	9.85161	15.4811	14.0737	21	10	15	14	9.85161	15.4811	14	13	11	11	17	17	14	9.85161	19	22	22.518
mmu-miR-654-5p	MIMAT0004897	nmiR01457.1:1	Endogenous1	13	13	8.88637	6	14.8106	7.40531	7	11	5	12	18	21	20	44	16.2917	22.2159	14	17	22	18	17.7727	7	25	35	6	14	19.2538	14.8106	26.6591	11	7	13	8	26.6591	13.3296	22	13	8	7	10	21	13	17.7727	11	15	8.88637
mmu-miR-664	MIMAT0012774	nmiR01458.1:1	Endogenous1	29	20	44.625	12	18.375	5.25001	20	8	3	27	70	40	45	50	15.75	21	29	18	51	26	10.5	18	14	51	3	30	15.75	31.5	23.625	35	16	25	27	31.5	10.5	47	30	13	22	8	30	20	18.375	25	33	34.125
mmu-miR-665	MIMAT0003733	nmiR01459.1:1	Endogenous1	11	15	24.289	7	12.8589	7.14382	10	9	9	12	19	8	18	17	14.2876	15.7164	13	6	19	17	10.0014	13	10	14	4	8	14.2876	4.28629	10.0014	8	9	12	20	11.4301	15.7164	15	10	10	6	8	10	14	11.4301	11	16	14.2876
mmu-miR-666-3p	MIMAT0004823	nmiR01460.1:1	Endogenous1	6	12	9.82352	6	5.61344	5.61344	7	13	8	9	22	8	23	17	8.42016	15.437	10	4	15	10	9.82352	17	14	21	3	17	22.4538	12.6302	14.0336	11	4	8	18	14.0336	16.8403	17	10	7	9	5	21	8	9.82352	8	10	11.2269
mmu-miR-666-5p	MIMAT0003737	nmiR01461.1:1	Endogenous1	10	8	16.5354	19	15.1575	8.26772	19	16	10	11	19	10	33	38	23.4252	16.5354	17	11	26	14	26.1811	15	22	38	4	10	11.0236	22.0473	11.0236	13	8	17	9	17.9134	16.5354	17	16	9	11	7	19	17	19.2914	9	17	15.1575
mmu-miR-667	MIMAT0003734	nmiR01462.1:1	Endogenous1	34	28	17.6512	24	24.0698	8.02327	23	8	11	21	32	18	57	53	14.4419	14.4419	32	26	37	23	16.0465	16	21	55	8	29	9.62793	19.2559	19.2559	33	10	21	22	17.6512	6.41862	27	23	21	13	6	28	15	9.62793	26	22	9.62793
mmu-miR-668	MIMAT0003732	nmiR01463.1:1	Endogenous1	15	17	19.6303	21	24.5378	24.5378	30	27	17	14	30	23	39	49	24.5378	18.4034	20	12	30	14	22.084	16	30	41	12	16	24.5378	20.8571	24.5378	24	16	14	10	35.5798	30.6723	27	18	15	13	15	25	9	26.9916	25	23	18.4034
mmu-miR-669a	MIMAT0003477	nmiR01464.1:1	Endogenous1	35	22	14.5904	31	20.8435	16.6748	22	9	9	19	44	26	60	49	12.5061	12.5061	30	28	36	19	27.0965	24	28	39	2	44	10.4217	18.7591	8.33738	21	11	24	33	16.6748	10.4217	32	25	12	35	5	33	26	10.4217	25	35	14.5904
mmu-miR-669e	MIMAT0005853	nmiR01466.1:1	Endogenous1	9	8	17.5994	18	17.5994	17.5994	20	15	20	11	21	26	42	43	15.0852	17.5994	19	15	22	24	23.8849	17	43	30	5	9	23.8849	26.3991	35.1988	23	14	12	10	23.8849	30.1704	25	12	21	20	9	15	10	20.1136	16	21	18.8565
mmu-miR-669f	MIMAT0005839	nmiR01467.1:1	Endogenous1	136	72	90.3239	41	53.5253	30.108	47	11	8	104	65	52	210	232	20.072	23.4173	92	46	140	48	30.108	30	54	119	7	86	43.4893	53.5253	46.8346	66	55	28	72	40.144	23.4173	200	94	28	118	9	61	76	16.7267	106	161	50.18
mmu-miR-669g	MIMAT0005832	nmiR01468.1:1	Endogenous1	9	12	22.4481	11	23.6295	8.27034	24	15	30	10	21	12	34	35	9.45181	22.4481	7	5	24	15	16.5407	15	37	24	5	11	10.6333	24.811	12.9962	18	6	10	1	18.9036	11.8148	23	12	4	7	13	17	7	22.4481	17	11	17.7222
mmu-miR-669h-5p	MIMAT0005841	nmiR01470.1:1	Endogenous1	13	19	20.3611	16	31.996	17.4523	20	11	7	17	234	18	98	93	31.996	26.1785	27	18	38	22	17.4523	10	57	111	6	9	23.2698	98.8966	26.1785	23	11	16	8	23.2698	11.6349	24	7	7	9	6	81	11	29.0872	17	18	31.996
mmu-miR-669i	MIMAT0005840	nmiR01471.1:1	Endogenous1	9	10	35.7962	18	20.0459	27.2051	28	13	20	21	51	14	54	42	21.4777	21.4777	15	19	35	18	34.3644	17	45	41	10	8	25.7733	25.7733	22.9096	29	10	8	13	34.3644	18.614	26	21	21	24	9	47	11	21.4777	32	22	24.3414
mmu-miR-669j	MIMAT0005838	nmiR01472.1:1	Endogenous1	8	20	38.1913	33	45.5358	29.378	26	19	29	22	102	29	70	44	22.0335	22.0335	14	19	36	21	35.2536	30	50	57	15	14	20.5646	35.2536	16.1579	32	22	12	18	44.0669	29.378	33	14	19	17	8	48	10	32.3158	24	23	42.598
mmu-miR-669m	MIMAT0009419	nmiR01474.1:1	Endogenous1	4	8	9.18701	7	11.0244	3.6748	11	5	3	8	23	16	18	17	11.0244	12.8618	7	4	17	5	12.8618	6	12	24	8	12	7.34961	9.18701	7.34961	7	5	4	13	16.5366	1.8374	12	3	6	3	7	17	4	5.5122	3	12	3.6748
mmu-miR-669o	MIMAT0009421	nmiR01475.1:1	Endogenous1	18	21	27.29	17	27.29	27.29	18	11	10	26	158	12	74	70	25.1908	23.0915	21	24	40	24	18.8931	15	33	53	10	24	27.29	35.6869	29.3892	23	14	23	30	33.5877	25.1908	41	20	15	17	10	61	23	20.9923	32	34	23.0915
mmu-miR-670	MIMAT0003736	nmiR01476.1:1	Endogenous1	26	41	55.1689	34	55.1689	47.8131	41	16	24	57	61	41	55	56	27.5845	33.1013	46	34	67	45	44.1351	18	61	56	9	16	42.2962	47.8131	33.1013	37	42	15	21	53.3299	36.7793	81	42	24	45	12	47	19	45.9741	52	48	40.4572
mmu-miR-671-3p	MIMAT0004821	nmiR01477.1:1	Endogenous1	10	12	13.5179	10	15.0198	7.50992	14	8	9	9	24	14	35	27	10.5139	24.0317	14	11	27	16	15.0198	13	24	19	2	25	12.0159	16.5218	12.0159	13	11	11	15	12.0159	12.0159	14	13	17	12	7	20	11	16.5218	15	14	18.0238
mmu-miR-671-5p	MIMAT0003731	nmiR01478.1:1	Endogenous1	7	9	11.5933	11	6.62476	4.96857	8	12	9	8	16	14	24	23	9.93714	14.9057	19	10	15	14	3.31238	8	13	22	4	16	8.28095	8.28095	9.93714	10	5	7	4	9.93714	29.8114	6	11	3	7	8	13	10	4.96857	15	15	11.5933
mmu-miR-672	MIMAT0003735	nmiR01479.1:1	Endogenous1	63	33	16.1688	11	21.5584	13.474	20	3	4	35	37	17	83	82	2.6948	10.7792	56	35	60	26	13.474	7	27	37	2	97	10.7792	5.3896	13.474	46	26	23	37	10.7792	13.474	30	41	7	31	10	40	46	10.7792	25	28	16.1688
mmu-miR-673-3p	MIMAT0004824	nmiR01480.1:1	Endogenous1	7	8	6.54469	5	6.54469	1.63617	9	7	5	9	17	8	15	20	9.81704	6.54469	13	10	13	6	3.27235	12	9	16	4	7	11.4532	9.81704	6.54469	15	4	11	4	6.54469	6.54469	9	8	3	6	5	12	8	11.4532	5	6	24.5426
mmu-miR-673-5p	MIMAT0003739	nmiR01481.1:1	Endogenous1	23	10	10.8006	14	17.5509	10.8006	23	9	14	14	23	17	33	51	17.5509	14.8508	24	23	34	16	13.5007	8	14	24	4	17	18.901	4.05021	20.251	16	8	12	10	18.901	10.8006	17	10	6	15	20	12	13	12.1506	9	8	18.901
mmu-miR-674	MIMAT0003740	nmiR01482.1:1	Endogenous1	37	21	44.1778	36	48.5956	11.0444	28	25	19	41	73	46	80	118	22.0889	26.5067	76	41	69	46	33.1333	26	57	79	8	88	57.4311	35.3422	48.5956	74	38	53	85	17.6711	33.1333	68	55	32	65	6	48	70	35.3422	50	89	22.0889
mmu-miR-675-3p	MIMAT0003726	nmiR01483.1:1	Endogenous1	14	12	16.4366	10	4.93099	4.93099	17	4	6	12	12	6	38	34	11.5056	11.5056	12	10	19	4	1.64366	17	14	37	4	12	6.57465	14.793	9.86198	8	5	8	7	13.1493	6.57465	17	9	8	9	1	13	8	4.93099	8	14	6.57465
mmu-miR-675-5p	MIMAT0003725	nmiR01484.2:2	Endogenous1	15	19	14.5733	12	21.1976	6.62425	13	10	15	9	24	15	26	17	9.27395	14.5733	17	16	39	22	13.2485	10	14	18	4	8	11.9236	11.9236	11.9236	16	7	10	11	17.223	6.62425	20	21	13	12	10	19	6	21.1976	17	22	13.2485
mmu-miR-676	MIMAT0003782	nmiR01485.1:1	Endogenous1	43	30	30.6339	34	59.5659	27.2301	51	24	37	39	67	37	89	135	42.5471	39.1433	68	48	97	33	30.6339	39	68	94	11	68	39.1433	32.3358	49.3546	50	30	33	80	30.6339	56.1621	74	42	42	45	17	59	44	40.8452	45	55	30.6339
mmu-miR-677	MIMAT0003451	nmiR01486.1:1	Endogenous1	8	17	14.9093	11	10.4365	11.9274	7	6	3	11	26	8	21	25	19.382	16.4002	16	9	17	14	13.4183	7	18	23	3	4	14.9093	22.3639	8.94555	11	3	6	6	7.45463	16.4002	10	7	3	7	7	24	3	11.9274	10	5	8.94555
mmu-miR-678	MIMAT0003452	nmiR01487.1:1	Endogenous1	28	14	17.8507	9	15.6193	8.92533	12	4	7	15	20	4	32	18	13.388	8.92533	33	23	45	15	15.6193	10	9	15	4	18	15.6193	15.6193	13.388	24	18	16	23	4.46267	6.694	26	26	12	45	8	14	15	15.6193	25	15	2.23133
mmu-miR-679	MIMAT0003455	nmiR01488.2:2	Endogenous1	8	10	14.3528	6	14.3528	3.9144	12	4	8	10	6	10	17	22	6.524	13.048	10	12	19	8	9.1336	4	15	15	6	10	6.524	6.524	10.4384	13	7	5	7	7.8288	7.8288	14	8	5	10	9	12	4	11.7432	5	12	7.8288
mmu-miR-680	MIMAT0003457	nmiR01489.2:2	Endogenous1	6	5	8.03699	12	5.74071	3.44442	5	5	5	6	15	8	15	19	6.88885	6.88885	13	4	12	5	3.44442	7	11	14	4	3	10.3333	9.18513	4.59256	5	2	3	7	9.18513	6.88885	3	5	3	9	6	9	10	4.59256	9	5	4.59256
mmu-miR-681	MIMAT0003458	nmiR01490.1:1	Endogenous1	10	9	12.4571	15	9.68885	17.9936	12	7	6	4	13	14	21	21	11.073	20.7618	15	13	18	13	5.53648	16	9	22	4	10	9.68885	9.68885	8.30473	4	3	9	11	15.2253	15.2253	14	12	8	8	7	12	11	12.4571	16	10	9.68885
mmu-miR-682	MIMAT0003459	nmiR01491.1:1	Endogenous1	8	16	22.5742	17	26.3366	17.5577	22	19	26	14	30	20	34	47	26.3366	17.5577	19	14	30	16	23.8283	15	35	30	12	12	21.3201	26.3366	31.3531	27	11	9	11	26.3366	20.066	23	12	12	22	11	24	12	35.1154	18	21	27.5907
mmu-miR-683	MIMAT0003461	nmiR01492.1:1	Endogenous1	10	11	12.4181	10	15.1777	4.13938	6	10	8	13	9	8	23	21	4.13938	13.7979	10	5	14	10	11.0383	5	11	15	3	4	5.51917	11.0383	9.65854	8	9	4	14	17.9373	11.0383	12	4	3	3	9	12	15	4.13938	6	10	15.1777
mmu-miR-684	MIMAT0003462	nmiR01493.1:1	Endogenous1	10	13	29.303	25	26.9588	21.0982	23	20	25	11	31	14	33	44	11.7212	26.9588	18	10	25	13	28.1309	28	43	36	9	9	24.6145	21.0982	19.926	24	14	13	9	21.0982	28.1309	25	16	16	16	13	25	13	19.926	25	32	25.7866
mmu-miR-686	MIMAT0003464	nmiR01494.1:1	Endogenous1	5	8	5.20985	5	12.1563	12.1563	7	6	5	9	7	8	10	17	6.94647	10.4197	8	7	11	15	8.68308	2	10	16	1	9	12.1563	10.4197	3.47323	14	4	6	2	1.73662	3.47323	11	12	2	7	6	12	3	8.68308	9	10	12.1563
mmu-miR-687	MIMAT0003466	nmiR01495.1:1	Endogenous1	13	15	25.1332	16	17.7411	14.7842	18	11	7	9	26	17	33	47	14.7842	17.7411	10	9	29	24	13.3058	12	21	41	6	16	11.8274	14.7842	10.3489	16	10	11	17	23.6547	22.1763	29	16	12	5	11	22	13	17.7411	13	17	19.2195
mmu-miR-688	MIMAT0003467	nmiR01496.1:1	Endogenous1	12	19	41.2833	33	36.8601	41.2833	34	23	24	28	178	28	84	89	45.7065	38.3345	30	17	62	33	38.3345	37	94	86	17	19	38.3345	32.4369	42.7577	33	23	19	22	44.2321	33.9113	42	21	27	30	14	67	15	35.3857	29	23	48.6553
mmu-miR-689	MIMAT0003468	nmiR01497.1:1	Endogenous1	13	14	18.2642	27	22.8303	9.13212	12	17	3	22	31	30	36	42	16.7422	18.2642	25	12	34	23	27.3964	17	21	42	5	10	15.2202	21.3083	25.8743	25	4	15	15	30.4404	27.3964	20	20	12	18	12	25	16	22.8303	16	15	19.7863
mmu-miR-690	MIMAT0003469	nmiR01498.1:1	Endogenous1	26	32	31.5918	27	54.1573	29.3352	32	17	29	47	76	43	77	91	24.8221	40.618	35	21	72	37	42.8745	36	67	106	9	49	36.1049	31.5918	42.8745	61	48	21	30	27.0787	31.5918	55	31	25	36	10	66	21	42.8745	35	30	51.9008
mmu-miR-691	MIMAT0003470	nmiR01499.1:1	Endogenous1	46	16	29.5834	46	24.6528	24.6528	46	8	7	55	134	47	86	84	32.0487	19.7223	54	20	141	41	22.1876	7	40	46	6	21	22.1876	27.1181	22.1876	23	18	10	29	29.5834	29.5834	99	51	7	64	3	41	39	39.4445	24	60	29.5834
mmu-miR-692	MIMAT0003471	nmiR01500.1:1	Endogenous1	5	12	17.2795	7	15.7087	12.5669	13	4	3	15	20	10	25	31	12.5669	10.9961	23	18	18	15	17.2795	10	14	25	3	14	21.9921	9.42519	6.28346	14	6	9	10	14.1378	15.7087	9	7	11	11	10	14	14	9.42519	7	15	9.42519
mmu-miR-693-3p	MIMAT0004189	nmiR01501.2:2	Endogenous1	8	7	13.3813	15	12.1648	7.29888	13	16	12	13	19	14	32	27	10.9483	9.73184	19	9	18	11	18.2472	7	18	28	2	13	19.4637	14.5978	15.8142	14	4	11	7	18.2472	13.3813	16	14	4	13	21	20	14	14.5978	7	13	19.4637
mmu-miR-693-5p	MIMAT0003472	nmiR01502.1:1	Endogenous1	15	12	16.9799	10	16.9799	11.8859	8	15	6	14	24	11	24	38	11.8859	6.79196	16	8	23	20	16.9799	6	20	23	8	9	6.79196	5.09397	18.6779	15	3	16	14	22.0739	13.5839	11	11	6	5	2	13	6	25.4699	14	9	16.9799
mmu-miR-694	MIMAT0003474	nmiR01503.1:1	Endogenous1	8	16	37.0032	16	19.1869	19.1869	20	21	21	17	54	19	41	41	20.5574	24.6688	19	18	33	29	19.1869	25	45	38	9	12	20.5574	34.2623	26.0393	26	13	12	10	23.2983	26.0393	30	15	18	20	7	42	8	20.5574	25	24	32.8918
mmu-miR-695	MIMAT0003481	nmiR01504.1:1	Endogenous1	12	46	59.2624	31	32.325	41.3041	31	17	30	44	67	47	136	133	26.9375	35.9166	58	53	69	50	35.9166	16	72	147	22	21	28.7333	44.8958	50.2833	57	14	31	27	64.6499	34.1208	65	50	18	17	31	80	28	37.7125	29	47	37.7125
mmu-miR-696	MIMAT0003483	nmiR01505.1:1	Endogenous1	16	11	21.1498	18	19.828	14.5405	11	9	8	15	22	15	16	18	9.25306	17.1842	14	7	22	20	7.93119	13	23	20	6	10	19.828	15.8624	15.8624	23	7	10	14	19.828	7.93119	11	8	7	8	12	18	9	14.5405	16	21	10.5749
mmu-miR-697	MIMAT0003487	nmiR01506.2:2	Endogenous1	10	24	20.3365	14	20.3365	13.5577	24	22	10	18	32	13	22	42	21.6923	23.0481	29	15	38	35	31.1827	24	20	26	6	10	23.0481	25.7596	20.3365	26	9	21	13	24.4038	23.0481	25	28	13	9	13	33	14	24.4038	14	23	13.5577
mmu-miR-698	MIMAT0003488	nmiR01507.1:1	Endogenous1	10	10	13.2118	13	10.2758	4.40393	9	8	7	11	23	13	23	28	17.6157	11.7438	15	8	22	8	14.6798	10	12	17	1	9	11.7438	14.6798	5.87191	11	2	11	8	8.80786	16.1477	9	15	5	10	8	19	9	5.87191	6	8	8.80786
mmu-miR-700	MIMAT0003490	nmiR01508.1:1	Endogenous1	1	1	1.36653	4	1.36653	4.09959	4	1	1	2	5	4	7	5	1.36653	5.46612	1	1	2	4	1.36653	3	1	1	2	4	4.09959	5.46612	5.46612	1	1	2	7	5.46612	1.36653	5	3	1	4	1	7	1	1.36653	1	2	5.46612
mmu-miR-701	MIMAT0003491	nmiR01509.1:1	Endogenous1	11	10	8.47223	9	16.9445	8.47223	10	9	5	17	22	12	32	31	2.11806	8.47223	21	14	24	11	8.47223	10	16	22	1	22	6.35417	21.1806	4.23611	15	12	6	28	12.7083	12.7083	29	19	8	10	11	19	23	16.9445	17	25	6.35417
mmu-miR-702	MIMAT0003492	nmiR01510.1:1	Endogenous1	8	18	11.1752	15	19.5566	8.38139	11	5	8	14	16	13	26	38	18.1597	18.1597	11	16	35	11	13.969	15	16	23	5	9	12.5721	25.1442	23.7473	13	7	9	8	15.3659	13.969	10	11	8	11	11	26	8	19.5566	10	14	19.5566
mmu-miR-703	MIMAT0003493	nmiR01511.1:1	Endogenous1	21	23	19.0711	17	24.9391	16.1371	8	20	10	19	25	15	36	56	7.33504	19.0711	33	16	24	24	20.5381	14	20	30	5	23	8.80204	33.7412	13.2031	20	13	15	11	10.2691	29.3401	21	21	18	13	8	25	11	8.80204	17	15	17.6041
mmu-miR-704	MIMAT0003494	nmiR01512.2:2	Endogenous1	15	39	40.7094	17	19.2834	25.7112	20	12	11	24	155	30	63	89	32.139	53.565	34	24	61	34	19.2834	29	56	91	6	16	29.9964	62.1354	36.4242	26	13	16	25	27.8538	38.5668	36	16	16	13	8	78	20	34.2816	23	29	64.278
mmu-miR-706	MIMAT0003496	nmiR01514.1:1	Endogenous1	13	12	32.4999	4	8.55259	8.55259	12	9	7	15	26	16	31	24	10.2631	8.55259	19	9	20	7	15.3947	7	13	31	1	9	17.1052	11.9736	20.5262	15	7	15	1	18.8157	17.1052	19	10	10	7	9	22	14	17.1052	10	13	18.8157
mmu-miR-707	MIMAT0003497	nmiR01515.1:1	Endogenous1	8	8	13.1221	9	15.7465	11.8099	17	12	9	11	14	9	25	30	20.9953	14.4343	21	13	14	11	19.6831	14	18	26	2	4	9.18546	23.6198	11.8099	15	9	12	16	22.3075	11.8099	14	6	6	10	11	17	9	10.4977	7	19	15.7465
mmu-miR-708	MIMAT0004828	nmiR01516.1:1	Endogenous1	34	14	38.8596	24	47.3074	21.9641	31	22	22	27	39	19	77	77	27.0328	37.1701	50	26	72	41	40.5492	23	58	71	14	61	30.4119	42.2387	35.4805	49	51	30	28	27.0328	32.1014	75	34	20	39	25	59	34	40.5492	35	73	37.1701
mmu-miR-709	MIMAT0003499	nmiR01517.1:1	Endogenous1	23	22	17.4115	8	19.5879	4.35288	10	13	8	34	34	17	20	31	17.4115	13.0586	20	13	33	23	10.8822	13	10	23	4	24	17.4115	28.2937	13.0586	24	18	11	9	15.2351	26.1173	24	6	10	23	6	31	31	13.0586	17	19	23.9408
mmu-miR-710	MIMAT0003500	nmiR01518.1:1	Endogenous1	10	30	18.3488	23	25.6883	25.6883	19	7	14	14	226	18	48	46	33.0278	25.6883	21	17	46	22	20.1836	26	32	43	5	12	18.3488	38.5324	33.0278	15	9	23	20	20.1836	18.3488	29	14	15	14	12	42	16	22.0185	15	25	16.5139
mmu-miR-711	MIMAT0003501	nmiR01519.1:1	Endogenous1	4	11	11.4247	8	12.8528	5.71233	9	7	10	7	14	17	23	25	11.4247	7.14042	13	5	19	11	8.5685	13	12	21	3	9	5.71233	9.99659	17.137	13	11	13	12	12.8528	17.137	12	13	5	12	4	15	10	9.99659	9	17	14.2808
mmu-miR-712	MIMAT0003502	nmiR01520.1:1	Endogenous1	15	16	6.52784	8	19.5835	9.79176	13	11	6	17	24	20	24	35	19.5835	21.2155	20	7	25	19	16.3196	16	17	23	5	11	16.3196	22.8474	16.3196	15	11	13	15	24.4794	19.5835	14	11	10	10	6	13	11	9.79176	18	17	21.2155
mmu-miR-713	MIMAT0003504	nmiR01521.1:1	Endogenous1	12	10	5.18234	8	17.2745	13.8196	12	5	11	17	22	17	22	30	6.90979	19.0019	19	7	14	7	12.0921	9	20	25	2	14	6.90979	13.8196	12.0921	14	8	12	19	20.7294	6.90979	18	8	9	21	10	13	11	17.2745	12	7	17.2745
mmu-miR-714	MIMAT0003505	nmiR01522.2:2	Endogenous1	21	18	8.76641	11	20.455	23.3771	13	15	16	15	29	22	24	21	29.2214	11.6885	20	10	31	27	16.0718	8	23	28	1	14	14.6107	16.0718	20.455	15	8	13	21	21.916	16.0718	29	14	13	16	13	14	15	16.0718	14	18	10.2275
mmu-miR-715	MIMAT0003506	nmiR01523.1:1	Endogenous1	11	5	19.5726	6	12.5824	5.59217	9	14	5	4	16	11	15	23	11.1843	9.7863	16	8	20	13	20.9706	8	10	27	7	11	12.5824	4.19413	6.99022	10	1	10	5	15.3785	15.3785	10	6	7	7	9	13	9	5.59217	9	12	15.3785
mmu-miR-717	MIMAT0003510	nmiR01524.2:2	Endogenous1	20	16	35.4101	23	54.3798	32.8808	45	34	40	28	50	29	59	80	35.4101	36.6747	37	18	74	27	32.8808	41	62	71	15	28	34.1454	32.8808	42.998	33	20	28	22	39.204	39.204	45	29	32	37	17	47	18	41.7333	29	39	32.8808
mmu-miR-718	MIMAT0003514	nmiR01525.2:2	Endogenous1	10	13	12.7533	14	14.0286	10.2026	17	21	9	20	22	21	21	26	20.4053	14.0286	22	10	37	13	16.5793	18	21	18	4	12	22.9559	19.1299	11.478	22	15	16	15	15.304	19.1299	23	22	18	9	9	23	7	12.7533	17	20	12.7533
mmu-miR-719	MIMAT0003465	nmiR01526.2:2	Endogenous1	14	19	20.0669	11	15.7668	18.6335	11	19	11	19	66	14	35	42	21.5002	30.1003	20	7	22	21	18.6335	17	12	28	4	7	10.0334	34.4004	14.3335	18	10	10	15	15.7668	17.2002	20	17	8	8	5	31	11	24.3669	8	16	28.667
mmu-miR-720	MIMAT0003484	nmiR01527.1:1	Endogenous1	28681	11821	2990.33	14593	34318.9	6.65999	10037	278	272	32776	22705	19055	75392	124510	119.88	219.78	43890	17565	38046	8540	1531.8	3844	17078	34547	974	29722	406.259	4875.11	1092.24	11204	12772	9794	39990	186.48	99.8998	21080	17777	6459	24103	4	28457	26606	126.54	7309	20263	46.6199
mmu-miR-741	MIMAT0004236	nmiR01529.1:1	Endogenous1	11	15	21.5693	23	11.5036	10.0657	20	11	7	26	45	17	19	41	35.9488	20.1313	19	11	50	22	23.0073	19	25	31	3	25	33.0729	35.9488	30.197	18	11	22	11	41.7006	25.8832	34	19	16	8	18	23	19	15.8175	14	29	10.0657
mmu-miR-742	MIMAT0004237	nmiR01530.1:1	Endogenous1	9	23	38.6273	31	42.3655	33.6432	29	19	24	26	45	35	44	62	36.1353	28.659	31	23	47	38	42.3655	29	54	59	11	16	46.1036	36.1353	24.9209	39	24	19	18	43.6115	43.6115	31	27	30	30	20	32	9	29.905	28	33	31.1511
mmu-miR-743a	MIMAT0004238	nmiR01531.1:1	Endogenous1	13	13	12.2496	13	12.2496	7.65603	16	7	7	9	27	9	24	28	10.7184	13.7808	12	8	28	14	10.7184	6	10	24	4	8	10.7184	15.3121	7.65603	10	11	6	9	13.7808	9.18723	24	13	16	12	8	12	13	15.3121	14	9	15.3121
mmu-miR-743b-3p	MIMAT0004840	nmiR01532.1:1	Endogenous1	10	14	18.1345	20	16.4859	8.24296	13	13	9	15	75	19	33	35	23.0803	18.1345	30	13	26	23	9.89156	9	25	44	10	14	14.8373	16.4859	13.1887	18	5	12	9	28.0261	14.8373	21	11	10	11	13	26	14	13.1887	12	21	19.7831
mmu-miR-743b-5p	MIMAT0004839	nmiR01533.1:1	Endogenous1	12	10	16.8114	12	11.2076	8.4057	11	13	9	13	22	20	29	36	14.0095	12.6085	17	7	30	20	15.4104	12	20	31	4	16	15.4104	14.0095	12.6085	19	10	13	20	19.6133	9.80665	18	14	7	11	12	18	9	8.4057	13	14	14.0095
mmu-miR-744	MIMAT0004187	nmiR01534.1:1	Endogenous1	10	7	13.11	16	15.732	7.86598	14	6	11	16	31	13	23	29	18.354	13.11	20	5	33	13	17.043	18	24	27	1	6	18.354	24.909	13.11	17	8	11	13	15.732	13.11	12	8	15	5	11	10	11	17.043	19	20	19.665
mmu-miR-758	MIMAT0003889	nmiR01535.1:1	Endogenous1	9	6	8.17402	12	20.4351	12.261	10	8	3	9	19	21	17	20	12.261	16.348	9	10	18	12	5.44935	13	11	22	1	8	6.81169	12.261	12.261	10	10	5	10	12.261	20.4351	11	13	12	8	7	18	5	12.261	7	8	8.17402
mmu-miR-759	MIMAT0003897	nmiR01536.1:1	Endogenous1	9	12	14.1975	18	29.9724	12.62	16	11	3	14	26	15	26	24	6.30998	7.88747	20	3	27	15	15.7749	8	16	22	1	9	18.9299	18.9299	14.1975	9	5	7	11	17.3524	11.0425	11	13	11	10	16	22	10	15.7749	12	22	7.88747
mmu-miR-760	MIMAT0003898	nmiR01537.1:1	Endogenous1	15	17	9.61028	12	27.2291	9.61028	19	5	13	16	25	13	15	20	20.8223	19.2206	27	13	36	24	11.212	20	13	23	4	18	17.6189	11.212	19.2206	25	11	11	15	14.4154	19.2206	24	14	17	15	14	22	16	4.80514	16	21	16.0171
mmu-miR-761	MIMAT0003893	nmiR01538.2:2	Endogenous1	21	22	43.0259	29	40.495	39.2295	34	29	37	28	66	34	64	68	40.495	30.3713	35	19	47	42	44.2914	33	72	55	11	16	21.513	35.4331	41.7605	31	23	19	23	53.1497	26.5748	31	29	33	25	16	38	11	44.2914	42	37	27.8403
mmu-miR-762	MIMAT0003892	nmiR01539.2:2	Endogenous1	17	23	26.2745	27	36.4924	17.5163	31	33	37	22	46	35	67	57	20.4357	24.8148	40	16	51	32	37.9521	31	72	48	11	18	36.4924	26.2745	36.4924	30	17	14	14	39.4118	30.6536	37	26	21	29	11	35	12	27.7342	26	30	27.7342
mmu-miR-763	MIMAT0003896	nmiR01540.2:2	Endogenous1	6	12	6.68259	7	3.34129	3.34129	8	6	8	7	12	11	19	16	6.68259	6.68259	16	9	17	10	13.3652	6	12	11	1	7	20.0478	11.6945	6.68259	11	5	8	14	6.68259	8.35324	10	8	4	7	6	8	3	8.35324	5	9	10.0239
mmu-miR-764-3p	MIMAT0003895	nmiR01541.2:2	Endogenous1	8	14	12.5281	15	13.9201	9.7441	18	7	7	12	29	5	26	12	9.7441	15.3122	19	11	33	17	9.7441	13	6	15	2	20	8.35208	16.7042	15.3122	16	11	13	18	12.5281	15.3122	18	24	13	8	6	16	16	18.0962	19	14	9.7441
mmu-miR-764-5p	MIMAT0003894	nmiR01542.1:1	Endogenous1	21	35	28.5933	20	30.3804	21.445	25	14	16	25	98	22	63	65	32.1675	48.2512	26	27	47	22	14.2967	27	61	78	7	27	41.1029	28.5933	33.9545	30	6	37	22	33.9545	42.89	45	25	13	23	21	54	22	28.5933	32	30	30.3804
mmu-miR-767	MIMAT0012773	nmiR01543.1:1	Endogenous1	13	21	10.1606	12	11.4307	8.89056	8	12	11	14	29	13	19	20	8.89056	16.511	22	11	11	8	7.62048	14	5	9	4	12	8.89056	10.1606	11.4307	12	8	10	12	11.4307	19.0512	16	29	7	16	10	15	17	15.241	20	15	13.9709
mmu-miR-770-3p	MIMAT0003891	nmiR01544.2:2	Endogenous1	12	15	18.631	16	24.3637	11.4652	18	12	11	8	29	20	34	28	15.7647	18.631	19	9	31	21	20.0642	18	22	24	3	19	11.4652	18.631	15.7647	12	13	15	19	15.7647	20.0642	31	26	8	11	14	14	23	11.4652	13	26	18.631
mmu-miR-770-5p	MIMAT0004822	nmiR01545.1:1	Endogenous1	5	10	9.26827	6	6.17885	6.17885	11	6	7	14	19	12	17	15	15.4471	10.813	13	8	18	10	7.72356	9	6	5	3	8	3.08942	10.813	6.17885	8	3	11	13	12.3577	16.9918	14	5	9	5	10	9	7	6.17885	13	9	13.9024
mmu-miR-7a	MIMAT0000677	nmiR01546.1:1	Endogenous1	17	25	13.7251	9	11.7643	11.7643	9	4	5	19	35	16	33	17	9.80362	21.568	29	16	38	21	13.7251	16	18	28	5	30	19.6072	21.568	11.7643	17	15	21	20	15.6858	21.568	25	16	14	13	10	26	14	17.6465	14	13	21.568
mmu-miR-7b	MIMAT0000678	nmiR01547.1:1	Endogenous1	10	23	43.2747	35	67.3163	41.672	21	23	39	20	189	33	96	79	46.4803	49.6858	33	22	55	44	35.2609	30	65	82	12	19	43.2747	49.6858	33.6581	39	17	16	23	43.2747	46.4803	49	34	15	19	20	52	14	43.2747	34	36	30.4526
mmu-miR-802	MIMAT0004188	nmiR01548.1:1	Endogenous1	20	13	26.5821	13	20.675	10.3375	25	14	6	19	44	17	35	37	16.2446	23.6285	31	13	35	20	10.3375	15	31	40	1	15	20.675	39.8732	22.1518	27	10	16	13	31.0125	19.1982	24	21	14	23	16	25	16	20.675	27	11	23.6285
mmu-miR-804	MIMAT0004210	nmiR01549.2:2	Endogenous1	12	26	17.206	8	20.0737	22.9413	11	2	7	13	148	13	29	53	8.603	17.206	14	10	26	24	11.4707	5	13	38	3	24	11.4707	20.0737	25.809	10	13	13	12	14.3383	5.73533	24	8	8	5	7	39	8	5.73533	14	13	28.6767
mmu-miR-871	MIMAT0004841	nmiR01550.1:1	Endogenous1	10	10	32.6079	27	30.1925	30.1925	30	18	36	19	31	16	39	42	19.3232	32.6079	24	19	40	20	27.7771	21	61	46	13	20	26.5694	22.9463	28.9848	38	19	23	13	28.9848	25.3617	29	17	17	24	17	32	7	30.1925	15	26	33.8156
mmu-miR-872	MIMAT0004934	nmiR01551.1:1	Endogenous1	44	42	27.1737	60	32.1144	12.3517	52	6	15	50	70	52	122	150	14.822	14.822	88	43	83	41	27.1737	57	67	77	8	98	37.0551	29.6441	32.1144	48	42	63	99	41.9958	29.6441	73	59	35	90	12	71	86	29.6441	52	74	14.822
mmu-miR-873	MIMAT0004936	nmiR01552.1:1	Endogenous1	17	31	17.559	9	26.3385	13.1692	22	14	5	17	48	20	31	43	24.8752	20.4855	40	16	32	25	16.0957	18	32	36	6	14	8.7795	17.559	24.8752	14	12	20	17	27.8017	26.3385	26	22	11	9	21	28	18	20.4855	23	14	17.559
mmu-miR-874	MIMAT0004853	nmiR01553.1:1	Endogenous1	8	6	11.2006	16	25.2014	12.6007	12	6	5	14	22	16	23	24	8.40045	15.4008	14	9	28	13	18.201	10	12	21	2	8	11.2006	25.2014	15.4008	11	5	5	5	14.0008	8.40045	14	5	12	10	10	16	9	21.0011	5	17	9.80053
mmu-miR-875-3p	MIMAT0004938	nmiR01554.1:1	Endogenous1	12	14	14.9606	19	22.441	2.99213	14	5	5	9	25	10	21	24	11.9685	19.4488	15	11	19	13	17.9528	10	12	21	4	16	11.9685	14.9606	19.4488	9	7	12	12	14.9606	4.48819	20	8	11	13	9	19	13	10.4724	15	22	16.4567
mmu-miR-875-5p	MIMAT0004937	nmiR01555.1:1	Endogenous1	16	17	12.5041	23	20.8402	12.5041	16	10	12	12	34	24	26	21	12.5041	13.8935	23	13	29	21	18.0615	13	17	30	5	16	12.5041	26.3976	16.6722	16	13	15	10	15.2828	19.4509	17	17	14	13	11	19	14	12.5041	12	17	12.5041
mmu-miR-876-3p	MIMAT0004855	nmiR01556.1:1	Endogenous1	17	16	20.1707	18	30.2561	25.2134	24	29	27	17	41	26	42	51	18.91	27.7347	20	18	38	32	26.4741	27	49	45	10	15	26.4741	32.7774	21.4314	21	14	9	15	31.5167	28.9954	40	26	22	24	14	33	8	28.9954	25	35	35.2988
mmu-miR-876-5p	MIMAT0004854	nmiR01557.1:1	Endogenous1	38	42	22.1954	10	25.3662	38.0492	16	12	13	45	73	52	142	190	28.5369	28.5369	68	64	76	70	38.0492	16	54	212	34	26	25.3662	57.0739	47.5616	57	5	38	25	44.3908	28.5369	79	46	7	21	22	100	27	25.3662	20	52	31.7077
mmu-miR-877	MIMAT0004861	nmiR01558.1:1	Endogenous1	14	14	10.9331	9	10.9331	10.9331	7	7	13	9	15	16	29	14	18.7424	15.6187	21	6	23	21	6.24746	10	13	26	1	13	18.7424	24.9899	20.3043	20	5	13	12	7.80933	20.3043	16	12	7	10	13	18	10	10.9331	15	21	15.6187
mmu-miR-878-3p	MIMAT0004933	nmiR01559.1:1	Endogenous1	10	16	17.5565	6	21.9456	15.3619	15	8	13	24	29	31	43	80	39.502	19.751	39	25	31	25	32.9183	14	25	74	5	11	28.5292	24.1401	26.3347	32	6	17	10	26.3347	24.1401	25	24	8	2	5	32	14	19.751	18	26	32.9183
mmu-miR-878-5p	MIMAT0004932	nmiR01560.1:1	Endogenous1	9	11	8.53204	13	8.53204	17.0641	7	7	2	8	26	6	21	35	17.0641	13.6513	8	12	19	17	15.3577	11	18	37	2	10	18.7705	10.2384	22.1833	8	4	7	9	11.9449	22.1833	28	12	7	3	10	18	11	17.0641	8	16	17.0641
mmu-miR-879	MIMAT0004842	nmiR01561.1:1	Endogenous1	5	11	17.9048	14	15.1502	17.9048	15	11	7	17	25	15	22	16	16.5275	16.5275	30	11	29	10	12.3956	10	19	20	4	16	15.1502	16.5275	19.2821	21	9	16	6	13.7729	11.0183	21	7	11	13	9	15	13	16.5275	14	15	6.88645
mmu-miR-880	MIMAT0004844	nmiR01562.1:1	Endogenous1	11	10	14.7268	15	17.6721	16.1994	14	12	7	22	21	13	31	46	22.0901	16.1994	22	14	24	13	13.2541	9	28	32	4	17	20.6175	19.1448	17.6721	23	7	10	9	14.7268	10.3087	22	15	9	13	7	23	16	13.2541	23	18	16.1994
mmu-miR-881	MIMAT0004846	nmiR01563.1:1	Endogenous1	10	7	17.1609	13	31.2016	9.36047	18	8	14	5	33	14	29	35	15.6008	10.9205	11	12	31	17	20.281	11	29	32	8	9	21.8411	15.6008	21.8411	24	10	11	6	21.8411	15.6008	24	14	9	13	10	14	6	23.4012	13	18	17.1609
mmu-miR-882	MIMAT0004847	nmiR01564.1:1	Endogenous1	7	20	10.2199	7	10.2199	2.91998	17	12	5	7	23	13	27	25	20.4399	16.0599	22	8	17	11	17.5199	12	16	24	3	8	14.5999	18.9799	2.91998	12	10	13	13	17.5199	13.1399	21	15	13	15	13	22	7	8.75994	13	16	14.5999
mmu-miR-883a-3p	MIMAT0004849	nmiR01565.1:1	Endogenous1	8	15	13.5042	13	3.37604	6.75208	13	8	10	9	125	11	40	23	13.5042	18.5682	17	12	29	12	15.1922	12	24	38	5	11	18.5682	11.8161	11.8161	15	8	11	10	16.8802	13.5042	16	7	9	8	11	30	5	11.8161	10	20	18.5682
mmu-miR-883a-5p	MIMAT0004848	nmiR01566.1:1	Endogenous1	18	16	23.3963	28	39.9114	30.2776	32	22	31	20	94	23	61	63	17.8913	33.0301	26	21	47	25	37.1589	27	72	43	12	17	24.7726	45.4164	35.7826	33	12	16	13	41.2877	28.9014	28	18	21	28	8	30	14	46.7927	28	25	24.7726
mmu-miR-883b-3p	MIMAT0004851	nmiR01567.1:1	Endogenous1	11	14	9.95492	7	11.3771	8.53279	7	15	8	19	28	12	16	24	17.0656	14.2213	7	10	21	14	11.3771	11	20	24	2	9	18.4877	12.7992	15.6434	11	3	12	13	18.4877	12.7992	9	13	6	10	7	27	9	11.3771	11	11	18.4877
mmu-miR-883b-5p	MIMAT0004850	nmiR01568.1:1	Endogenous1	8	17	30.9316	19	30.9316	27.9858	15	15	22	12	86	16	56	60	36.8234	29.4587	22	11	31	24	36.8234	22	47	45	13	12	13.2564	35.3504	27.9858	15	15	13	10	16.2023	44.188	32	12	17	18	9	32	11	33.8775	23	22	25.0399
mmu-miR-9	MIMAT0000142	nmiR01569.1:1	Endogenous1	11	4	12.5531	11	15.6914	3.13827	17	11	9	15	30	15	37	41	18.8296	12.5531	19	8	25	16	14.1222	11	12	24	4	12	20.3988	23.5371	12.5531	9	6	6	17	18.8296	7.84569	24	10	9	6	8	23	7	12.5531	17	11	25.1062
mmu-miR-92a	MIMAT0000539	nmiR01570.1:1	Endogenous1	18	23	17.0303	10	27.2484	8.51513	11	6	13	10	33	20	44	34	23.8424	17.0303	61	29	51	30	25.5454	14	15	20	2	43	22.1393	35.7635	15.3272	19	10	13	15	11.9212	25.5454	30	19	14	19	9	21	25	20.4363	14	18	27.2484
mmu-miR-92b	MIMAT0004899	nmiR01571.1:1	Endogenous1	44	16	16.4636	13	13.1708	11.5245	28	9	9	25	18	23	52	50	9.87813	8.23178	10	11	40	18	9.87813	12	18	27	3	17	18.1099	24.6953	18.1099	26	8	11	13	13.1708	11.5245	32	13	7	27	9	22	17	4.93907	14	21	13.1708
mmu-miR-93	MIMAT0000540	nmiR01572.1:1	Endogenous1	130	81	19.7696	44	14.8272	4.94239	30	3	6	108	70	82	262	272	14.8272	19.7696	219	123	190	69	34.5967	15	62	226	3	363	24.712	34.5967	34.5967	116	130	93	241	59.3087	29.6544	225	135	32	203	4	175	243	24.712	117	168	14.8272
mmu-miR-96	MIMAT0000541	nmiR01573.1:1	Endogenous1	295	140	87.9932	59	121.514	46.0917	55	22	25	209	127	155	398	348	100.564	92.1834	387	164	347	94	67.0425	33	108	279	18	398	62.8523	75.4228	50.2819	153	101	121	211	54.472	67.0425	258	180	53	208	26	185	185	54.472	124	231	79.6129
mmu-miR-98	MIMAT0000545	nmiR01574.2:2	Endogenous1	161	65	31.4318	114	38.1671	26.9415	104	13	9	138	318	88	346	299	44.9025	33.6769	193	84	242	90	38.1671	42	78	164	16	207	22.4513	71.844	26.9415	151	83	66	151	26.9415	22.4513	211	264	68	409	7	110	127	15.7159	165	190	20.2061
mmu-miR-99a	MIMAT0000131	nmiR01575.1:1	Endogenous1	322	148	201.278	214	180.091	68.8582	245	40	49	285	357	450	751	862	79.4518	164.2	694	444	582	172	84.7486	246	307	577	32	881	79.4518	222.465	84.7486	429	322	578	982	58.2647	84.7486	559	589	254	522	18	469	744	79.4518	425	567	143.013
mmu-miR-99b	MIMAT0000132	nmiR01576.2:2	Endogenous1	505	201	179.287	77	134.465	74.703	119	13	8	393	168	215	697	782	89.6436	104.584	380	190	631	173	97.1139	42	137	391	18	550	119.525	134.465	89.6436	315	284	78	209	89.6436	126.995	645	424	64	263	8	266	313	119.525	465	606	97.1139
NEG_A	ERCC_00096.1	ERCC_00096.1:230	Negative	14	17	13.46	6	26.9199	14.5816	12	13	19	18	16	19	24	21	12.3383	13.46	7	14	22	13	20.19	15	14	29	1	15	16.825	17.9466	13.46	8	8	18	17	19.0683	16.825	15	13	12	11	15	14	16	17.9466	12	17	25.7983
NEG_B	ERCC_00041.1	ERCC_00041.1:440	Negative	15	19	11.4137	17	16.4865	16.4865	18	13	9	16	35	12	28	19	12.6819	20.291	17	17	20	25	24.0956	15	14	22	2	16	13.9501	19.0228	25.3638	20	13	17	19	15.2183	13.9501	29	20	10	16	11	21	14	17.7546	15	24	16.4865
NEG_C	ERCC_00019.1	ERCC_00019.1:140	Negative	98	127	62.5125	31	113.993	88.253	21	17	20	146	117	162	343	477	44.1265	77.2214	174	159	146	167	91.9302	19	128	411	58	82	84.5758	102.962	95.6074	161	15	125	86	128.702	66.1898	138	123	24	20	78	214	98	95.6074	52	145	69.867
NEG_D	ERCC_00076.1	ERCC_00076.1:355	Negative	9	11	22.7845	18	12.6581	17.7213	11	18	11	11	27	14	27	31	13.9239	22.7845	21	6	29	16	17.7213	15	15	21	6	11	12.6581	16.4555	18.9871	12	6	15	19	25.3162	20.2529	16	19	11	14	16	21	15	13.9239	13	16	11.3923
NEG_E	ERCC_00098.1	ERCC_00098.1:785	Negative	16	17	24.9462	20	20.1945	16.6308	26	17	18	23	18	21	32	41	24.9462	21.3824	22	21	29	23	21.3824	25	26	32	7	23	24.9462	26.1341	28.5099	17	10	27	30	16.6308	22.5703	17	28	20	16	16	17	16	22.5703	15	14	16.6308
NEG_F	ERCC_00126.1	ERCC_00126.1:220	Negative	13	23	26.1326	19	21.3812	13.0663	19	14	11	15	25	15	31	22	21.3812	13.0663	22	20	30	19	21.3812	19	9	29	2	18	22.569	28.5083	33.2596	25	13	18	14	15.442	19.0055	28	25	20	10	12	21	21	19.0055	27	26	24.9447
NEG_G	ERCC_00144.1	ERCC_00144.1:15	Negative	12	13	22.0304	19	22.0304	13.463	17	14	21	17	37	18	33	40	19.5826	14.6869	15	10	23	12	22.0304	24	36	32	6	13	18.3586	17.1347	29.3738	12	5	16	11	18.3586	17.1347	26	17	15	15	15	31	3	14.6869	13	18	12.2391
NEG_H	ERCC_00154.1	ERCC_00154.1:115	Negative	6	17	34.2816	16	42.852	19.9976	33	22	28	12	39	21	42	38	9.9988	21.426	19	14	39	29	35.71	17	60	46	10	14	22.8544	17.1408	19.9976	26	20	8	8	31.4248	27.1396	32	10	14	22	12	25	7	12.8556	22	24	22.8544
osa-miR414	MIMAT0001330	nmiR01622.1:1	SpikeIn	16	9	11.9864	19	22.4746	4.49491	13	5	9	17	18	16	37	38	14.983	17.9796	22	18	30	20	19.4779	18	22	30	6	10	22.4746	29.9661	13.4847	15	9	7	17	31.4644	17.9796	17	19	7	10	11	15	16	19.4779	18	15	17.9796
POS_A	ERCC_00117.1	ERCC_00117.1:385	Positive	59191	50893	403427	38150	446279	348145	37976	38667	36099	56164	29412	63968	18149	23302	368870	332228	29954	24484	33337	27077	371912	35986	14478	22279	2608	55047	351859	477965	468360	30538	19119	68002	60386	476916	430498	27337	36864	42632	31941	32137	22889	56083	492491	33039	27560	345718
POS_B	ERCC_00112.1	ERCC_00112.1:695	Positive	20251	18092	156570	16611	164671	133417	16102	18242	15524	18951	11870	23046	7321	9209	158744	141437	14452	13181	12981	11709	154105	15934	5843	8979	1047	19491	147092	181596	189354	14507	9495	24085	21115	181263	159056	12149	15213	15856	12504	14343	9545	18840	168635	14963	12758	151459
POS_C	ERCC_00002.1	ERCC_00002.1:850	Positive	5550	4992	42605	4546	47317	39805.4	4680	5270	4605	5316	3767	6207	2340	2900	43866.8	38642.2	4199	3848	3746	3402	42910.6	4481	1771	2781	284	5339	40111	49988.4	52502.1	4087	2676	6531	5736	50037.7	43571	3606	4345	4612	3735	4022	2835	5491	45789	4296	3702	40692.6
POS_D	ERCC_00092.1	ERCC_00092.1:540	Positive	1151	903	8388.65	810	8762.19	6937.18	814	813	796	1012	602	1237	414	511	7790.98	6296.82	664	563	662	536	7716.27	828	375	507	71	1070	7364.08	9701.37	9103.71	739	434	1307	1138	9157.07	7876.36	600	768	870	691	659	465	1142	9167.75	704	607	7385.42
POS_E	ERCC_00035.1	ERCC_00035.1:485	Positive	260	217	185.144	153	1828.92	1550.34	135	142	158	244	129	279	89	129	1623.02	1344.44	121	118	135	114	1780.47	157	69	103	8	230	1586.68	1950.04	2192.28	117	82	267	239	1986.38	1889.48	120	149	165	111	118	104	222	1986.38	133	132	1344.44
POS_F	ERCC_00034.1	ERCC_00034.1:195	Positive	66	90	86.7431	69	72.6766	59.7824	88	62	68	84	71	88	77	102	62.1268	62.1268	70	47	76	55	72.6766	67	40	86	17	83	75.021	86.7431	86.7431	56	29	83	103	94.9485	75.021	76	83	75	52	58	75	90	71.5044	56	76	94.9485
Rpl19	NM_009078.1	NM_009078.1:20	Housekeeping	375	362	630.215	532	86.3943	15.8038	285	83	94	306	387	189	775	892	45.3043	52.6794	555	350	463	151	52.6794	504	312	468	55	703	60.0546	134.859	47.4115	361	312	501	1116	77.9656	63.2153	564	512	251	883	118	384	519	60.0546	366	494	42.1435
[truncated: 113 more columns]
