# Supplementary figures and images for: Selecting the most appropriate time points to profile in high-throughput studies
Source: eLife journal article supplement (doi:10.7554/elife.18541), 2017-01-26

# Randomization Experiment

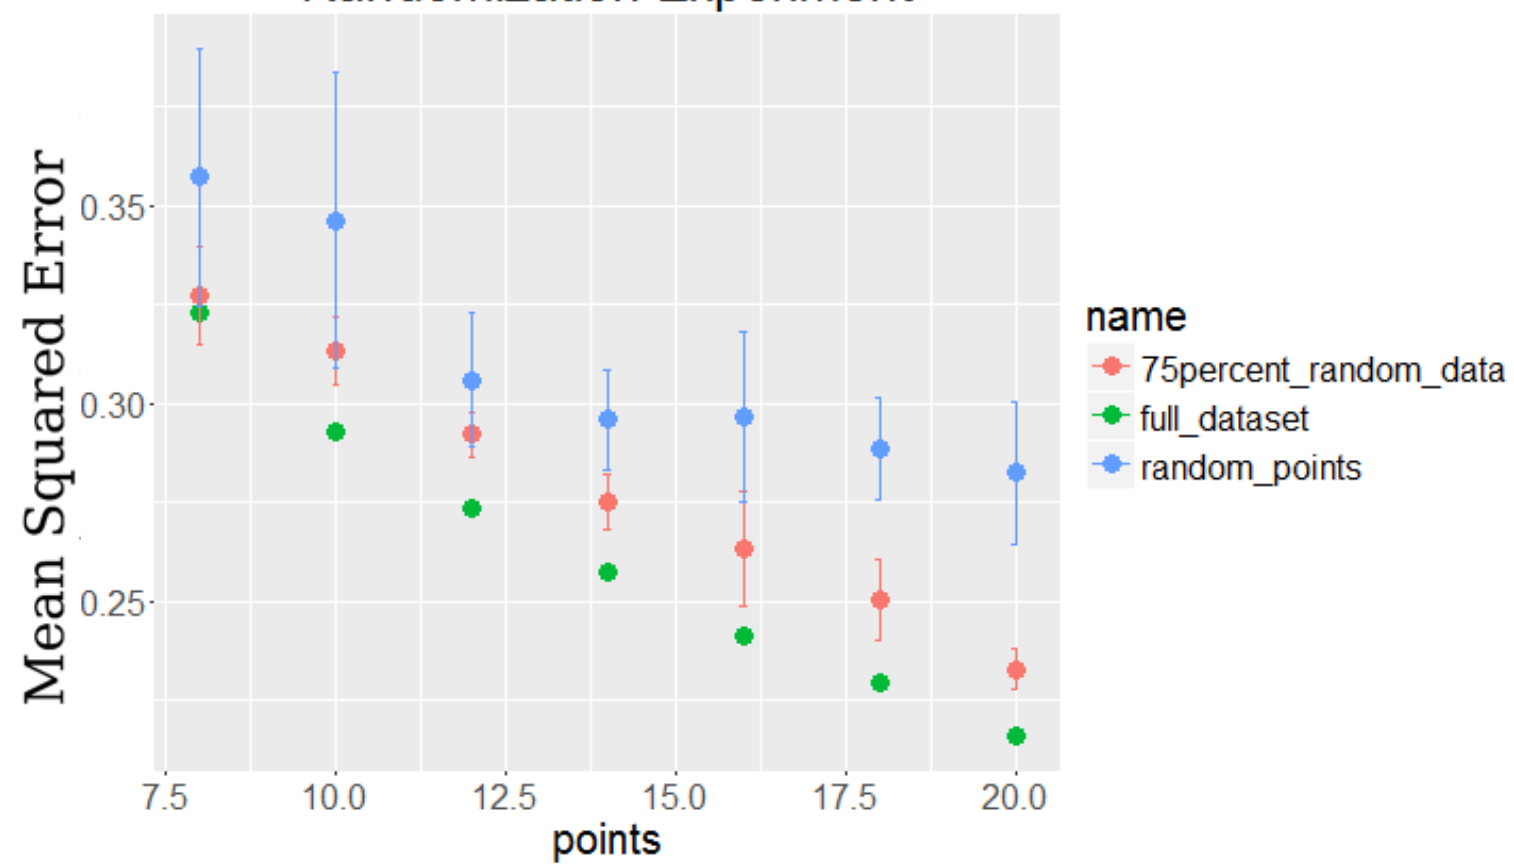

Supplement: supp [file elife-18541-supp-v1.zip › elife_poa_e18541_Figure_2_figure_supplement_3.pdf]

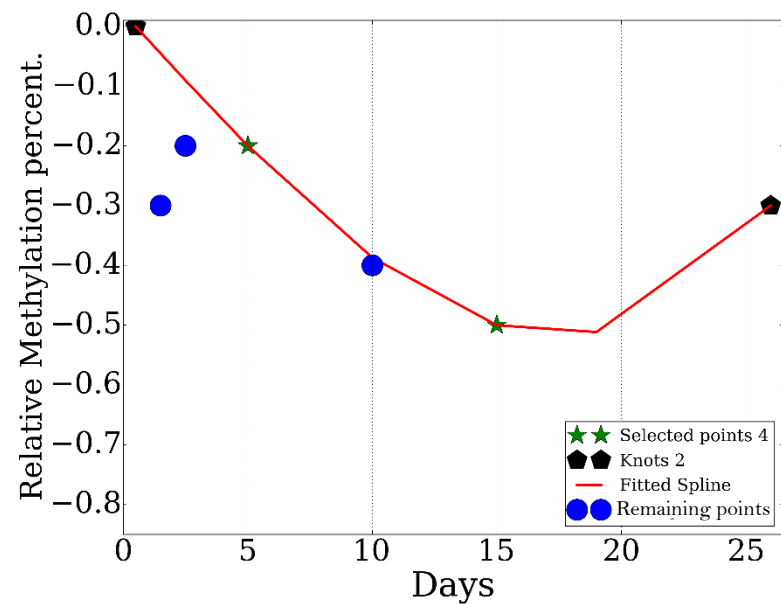

(a) Chrom. 2, 157423995  
(*Src*)

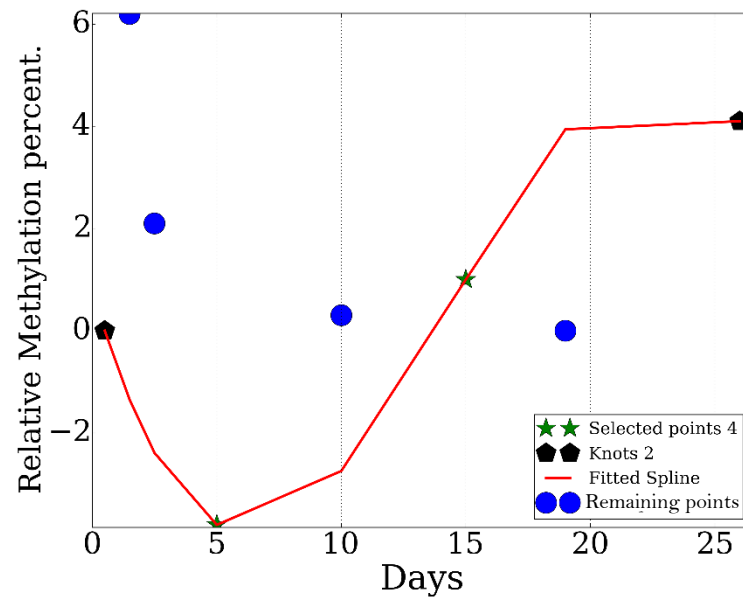

(b) Chrom. 5, 134721315  
(*Eln*)

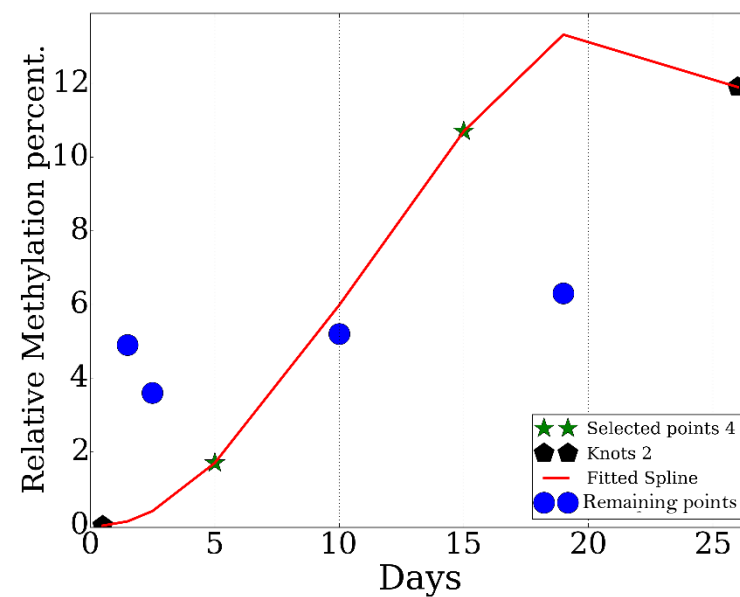

(c) Chrom. 12, 112657170  
(*Akt1*)

Supplement: supp [file elife-18541-supp-v1.zip › elife_poa_e18541_Figure_5_figure_supplement_1.pdf]

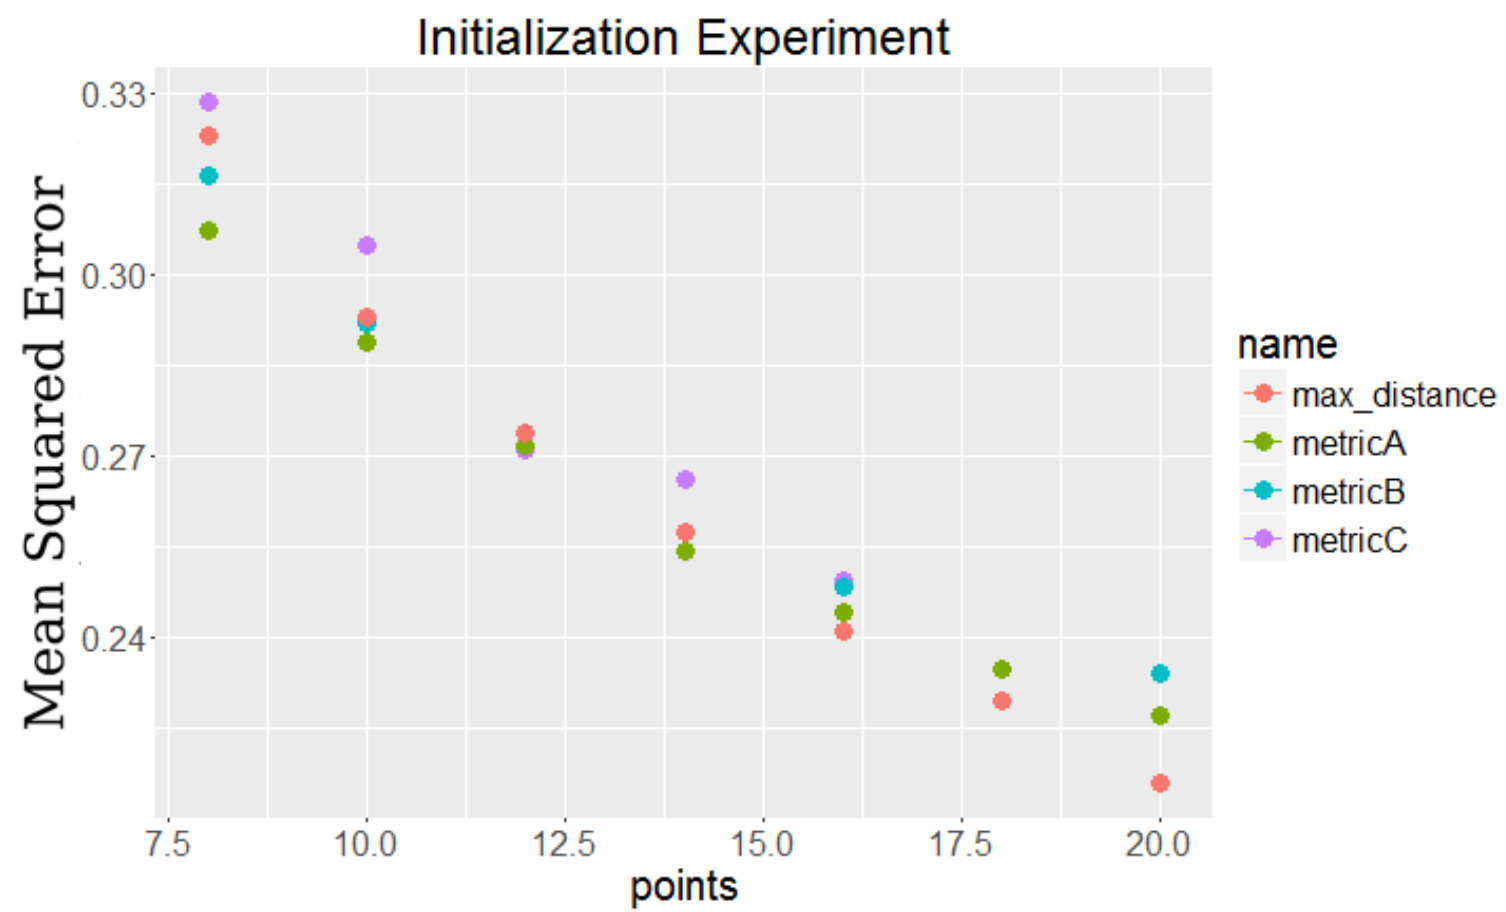

Supplement: supp [file elife-18541-supp-v1.zip › elife_poa_e18541_Figure_1_figure_supplement_2.pdf]

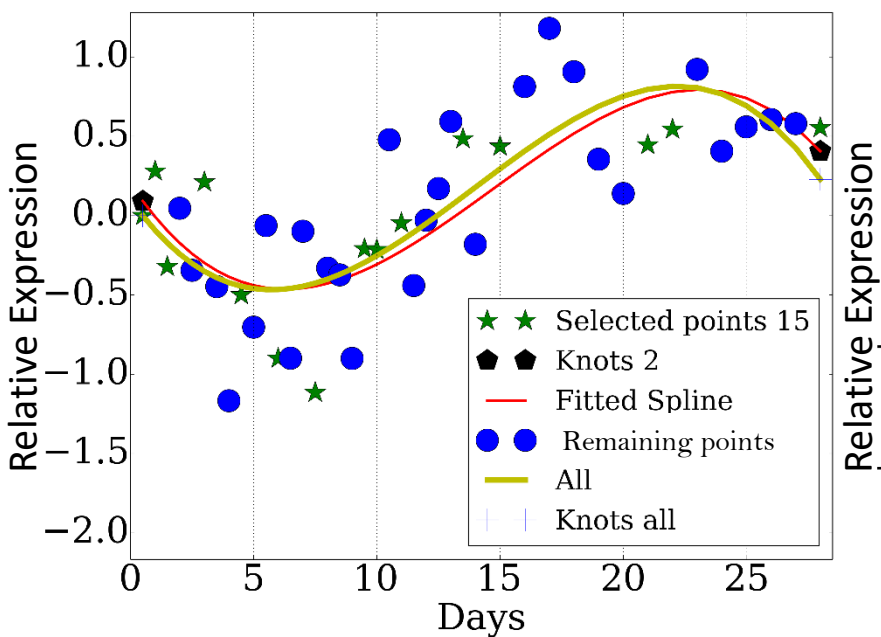

a) *Esr2*

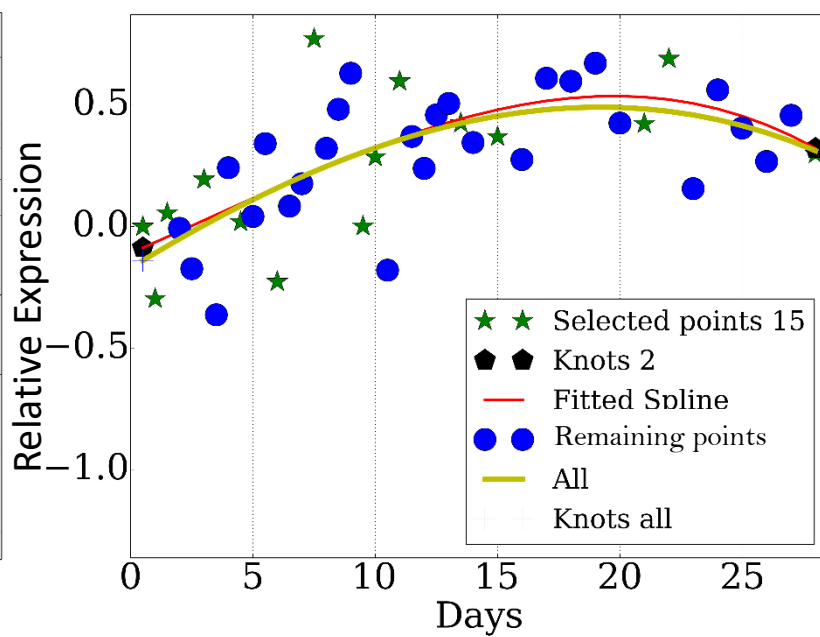

(b) *Nme3*

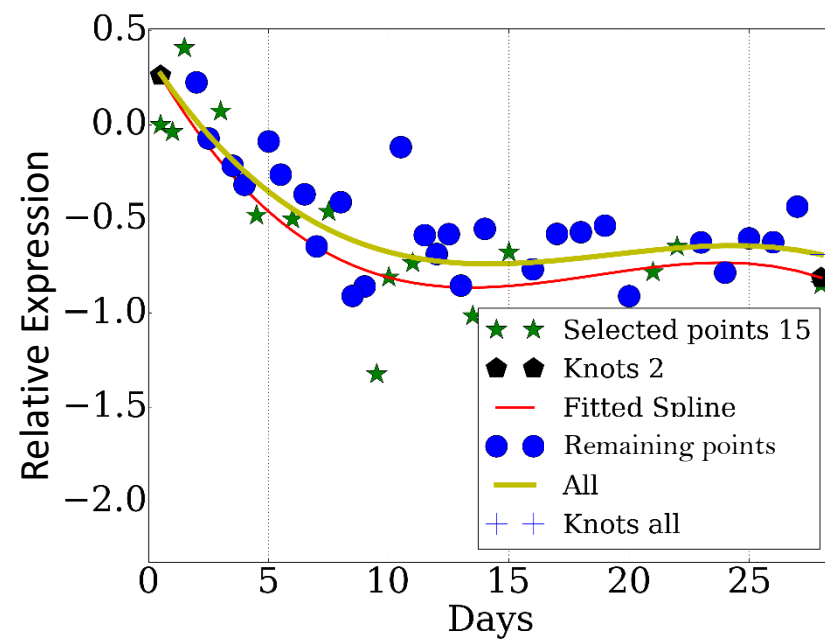

(c) *Polr2a*

Supplement: supp [file elife-18541-supp-v1.zip › elife_poa_e18541_Figure_3_figure_supplement_1.pdf]

TPS comparison to Singh et al method

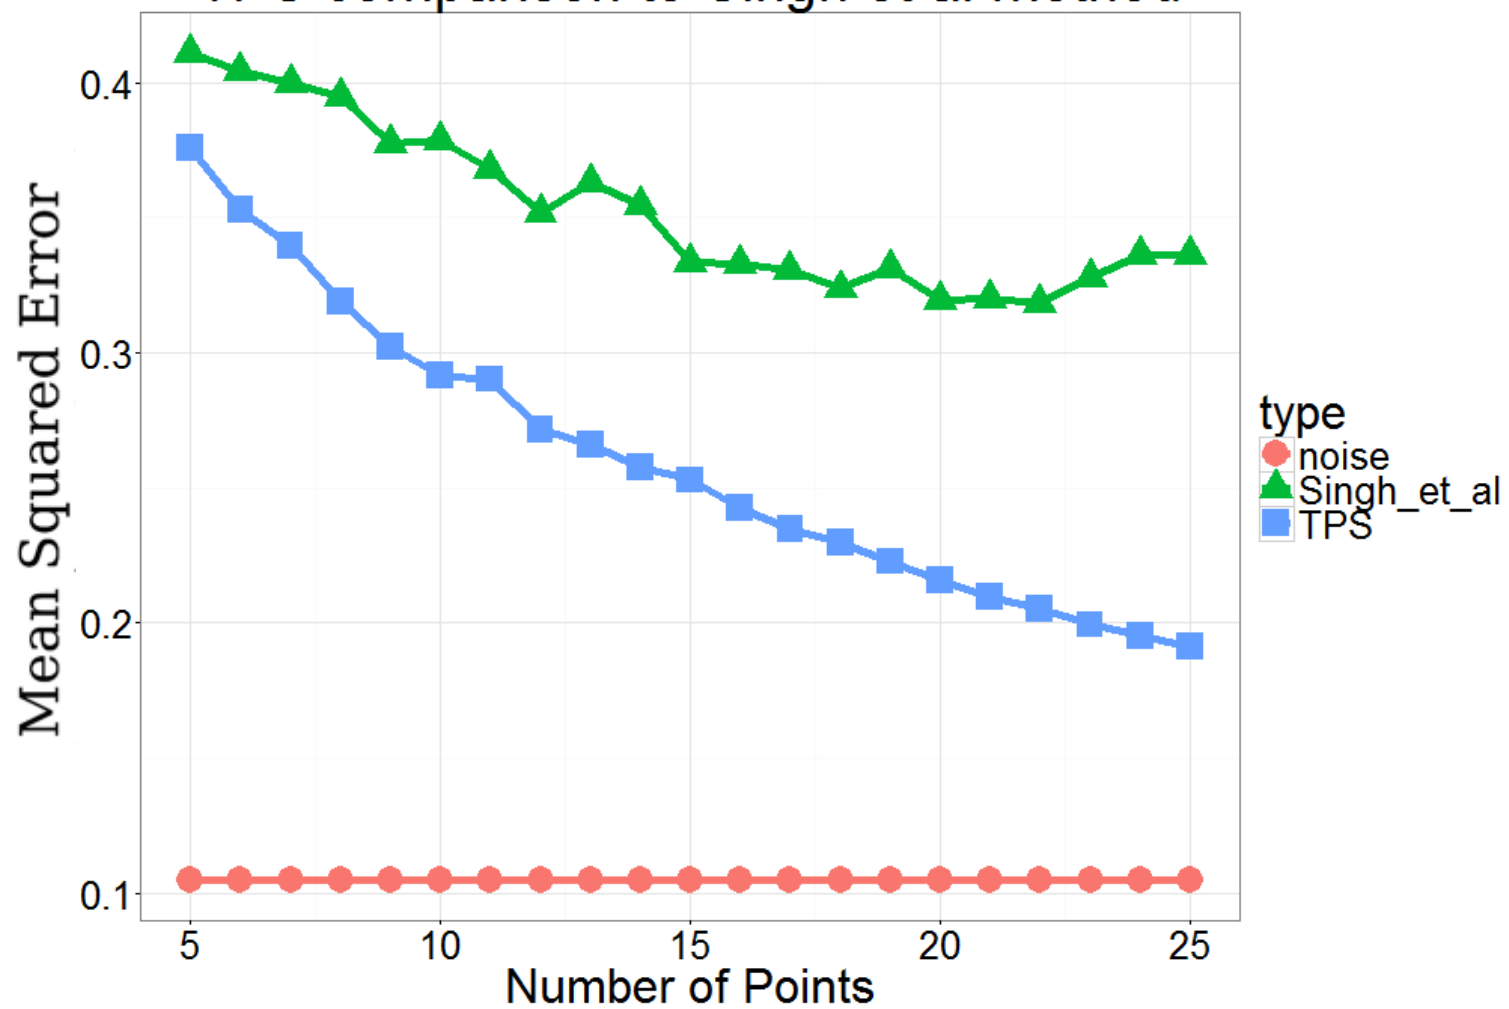

Supplement: supp [file elife-18541-supp-v1.zip › elife_poa_e18541_Figure_1_figure_supplement_1.pdf]

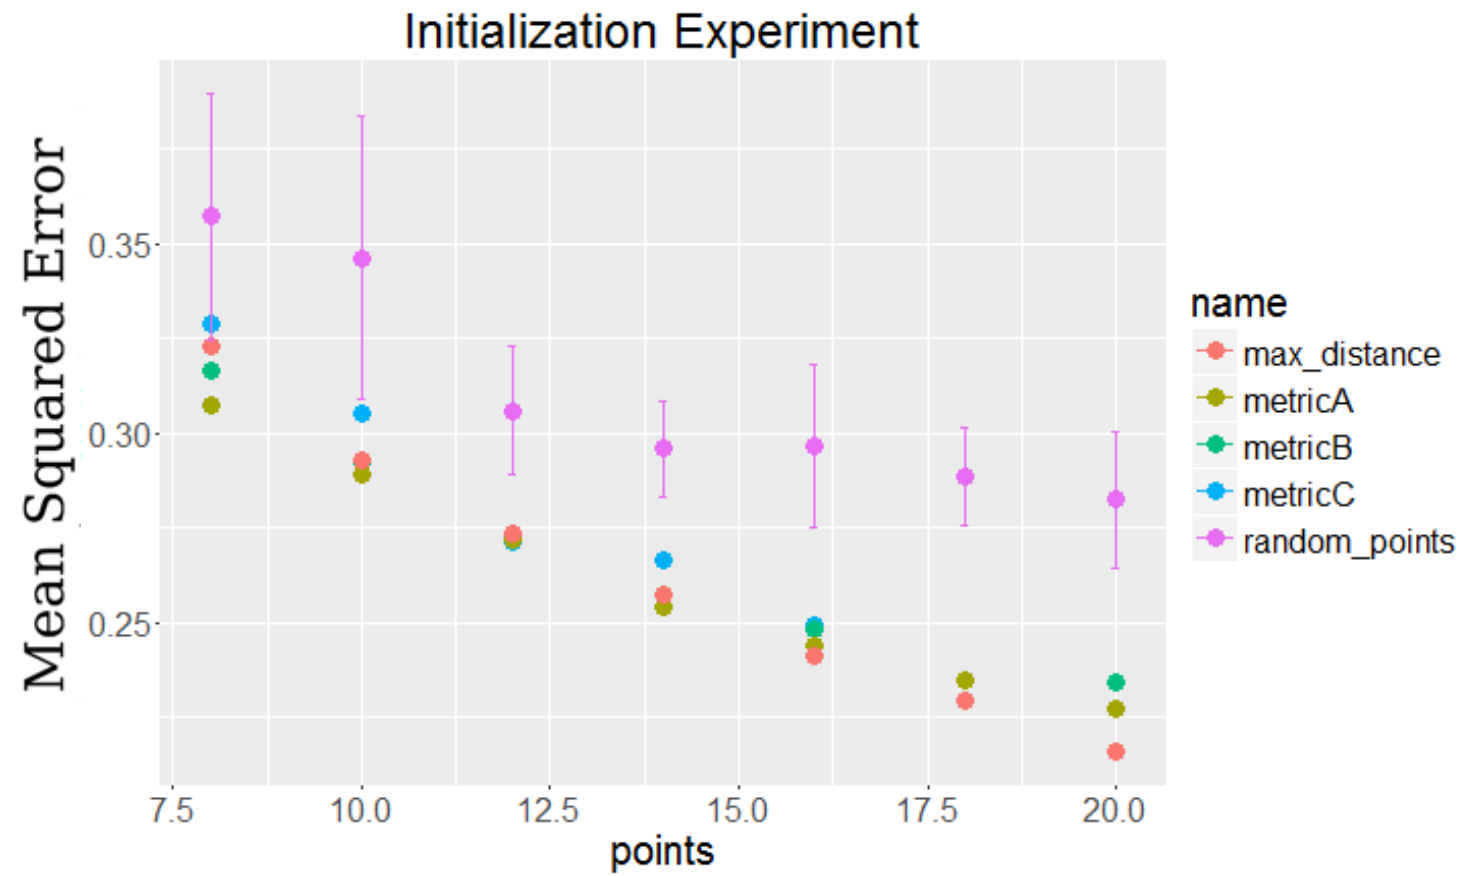

Supplement: supp [file elife-18541-supp-v1.zip › elife_poa_e18541_Figure_1_figure_supplement_3.pdf]

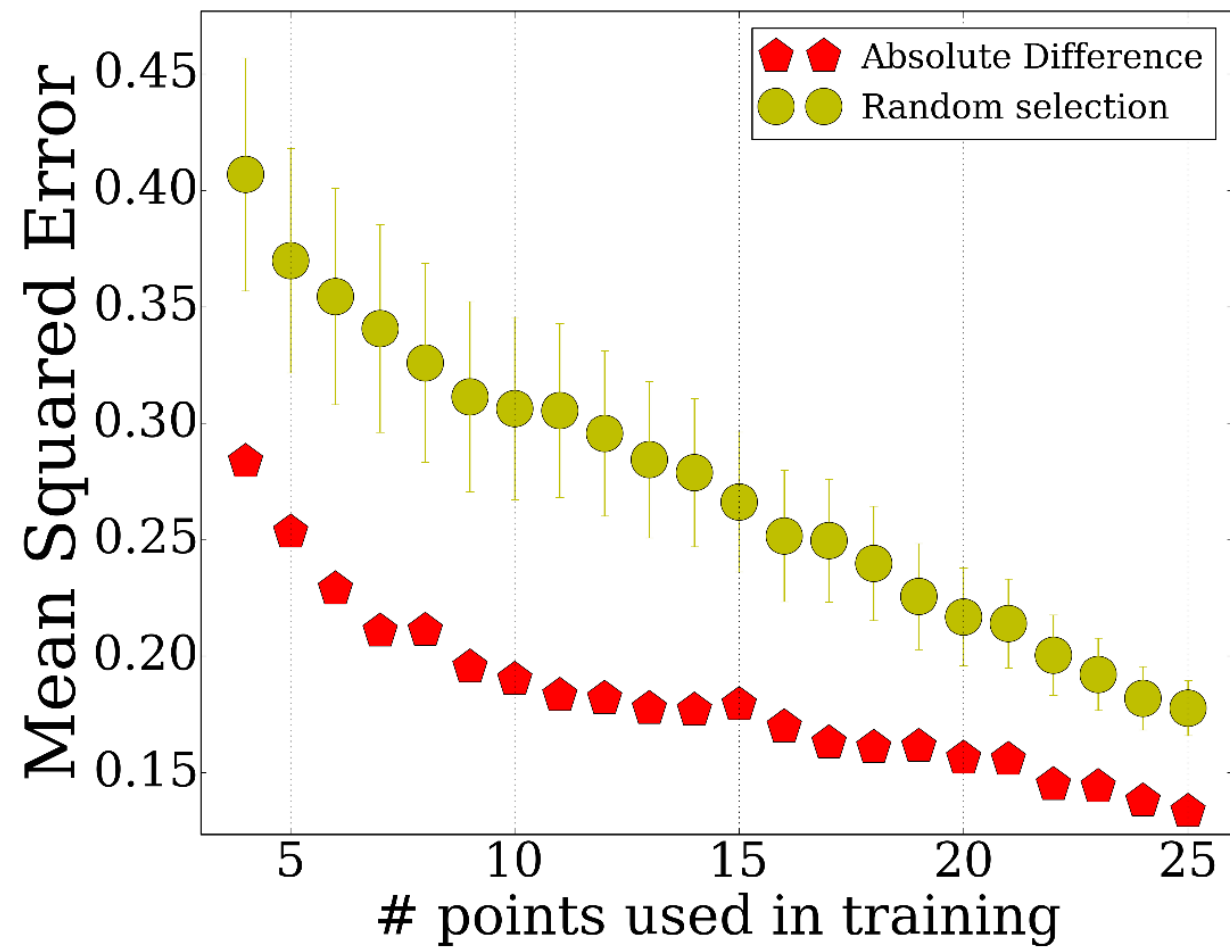

Supplement: supp [file elife-18541-supp-v1.zip › elife_poa_e18541_Figure_2_figure_supplement_4.pdf]

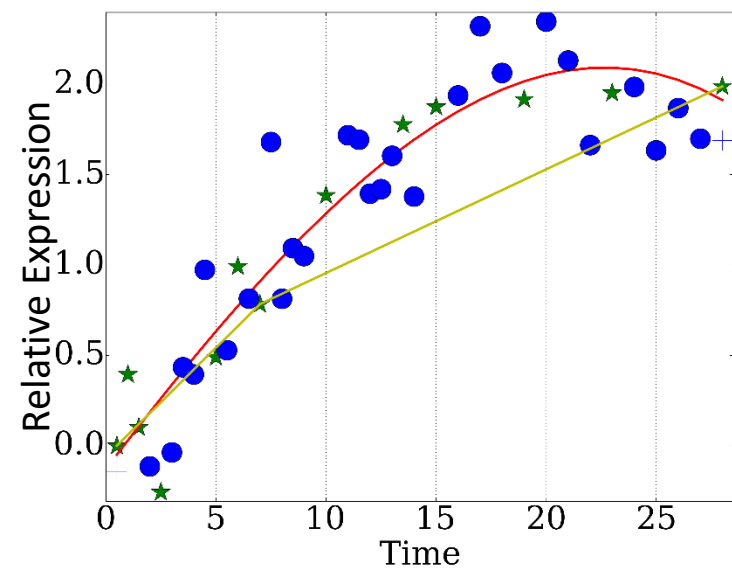

(a) *Pdgfra*

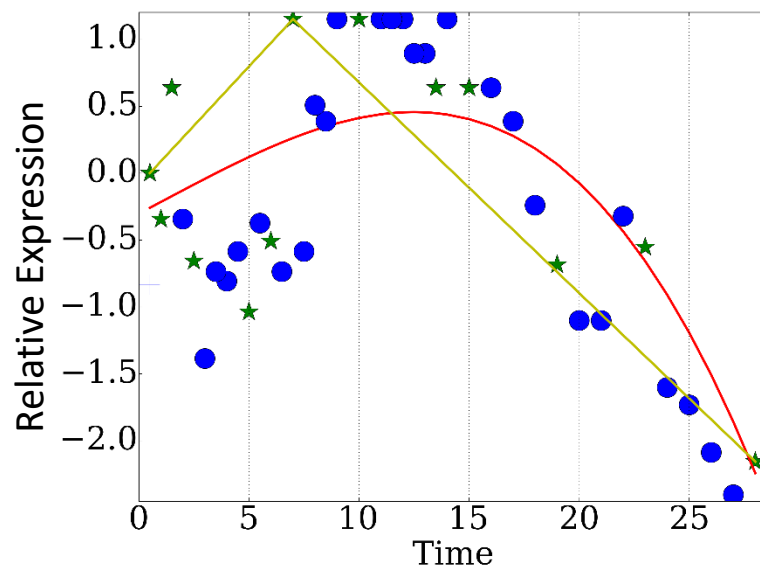

(b) *Eln*

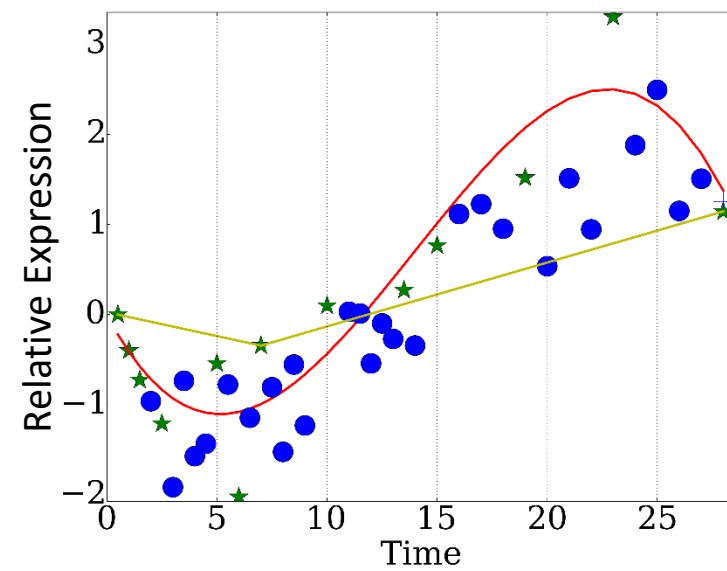

(c) *Lrat*

Supplement: supp [file elife-18541-supp-v1.zip › elife_poa_e18541_Figure_2_figure_supplement_2.pdf]

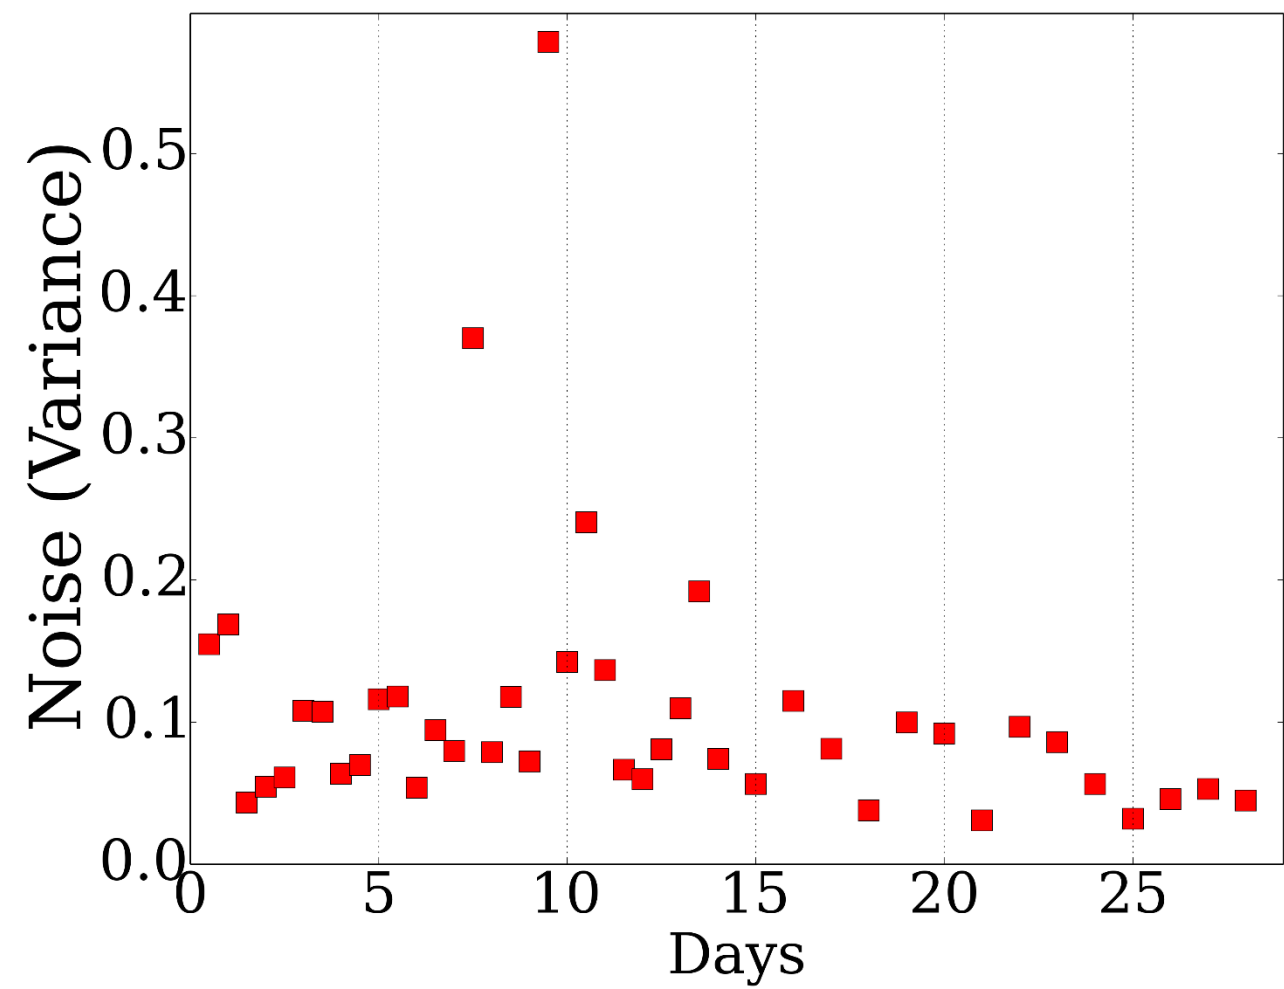

Supplement: supp [file elife-18541-supp-v1.zip › elife_poa_e18541_Figure_2_figure_supplement_1.pdf]

Bootsrap of mRNA-Methylation Pearson Correlation

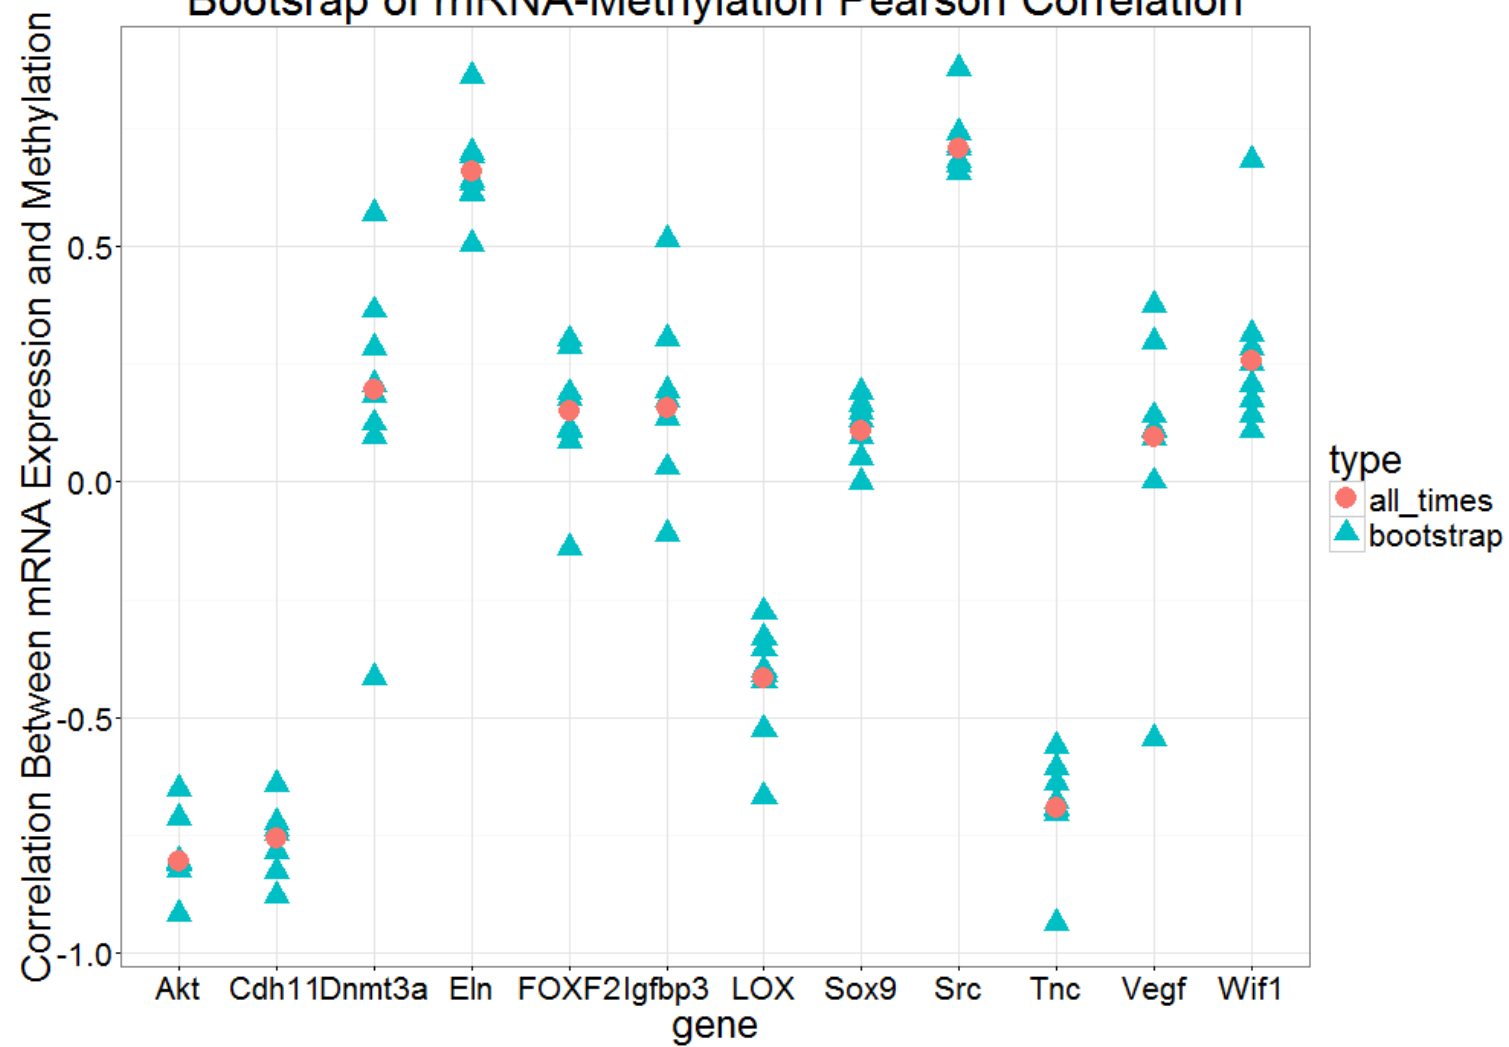

Supplement: supp [file elife-18541-supp-v1.zip › elife_poa_e18541_Figure_5_figure_supplement_2.pdf]

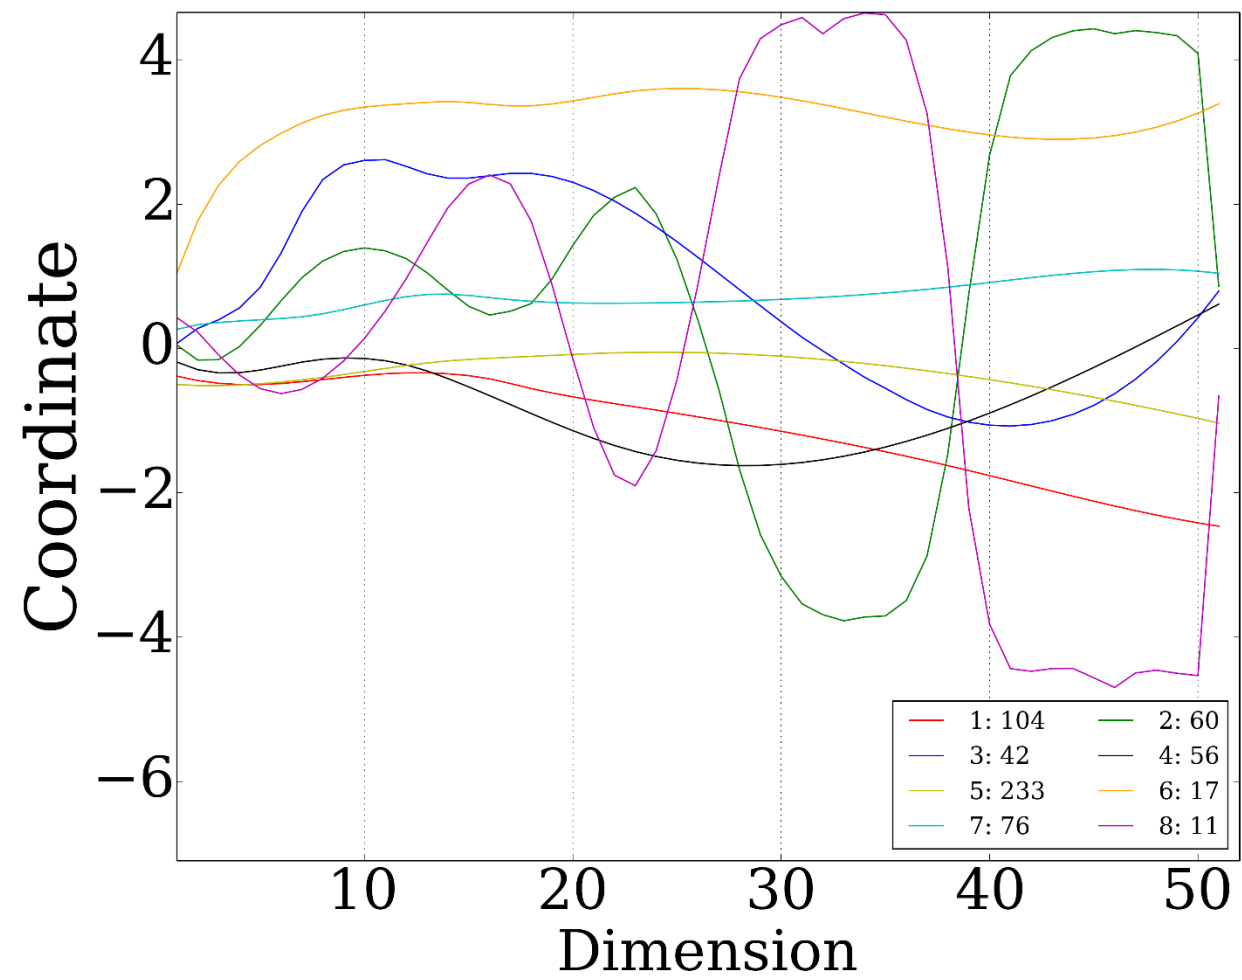

Supplement: supp [file elife-18541-supp-v1.zip › elife_poa_e18541_Figure_4_figure_supplement_1.pdf]

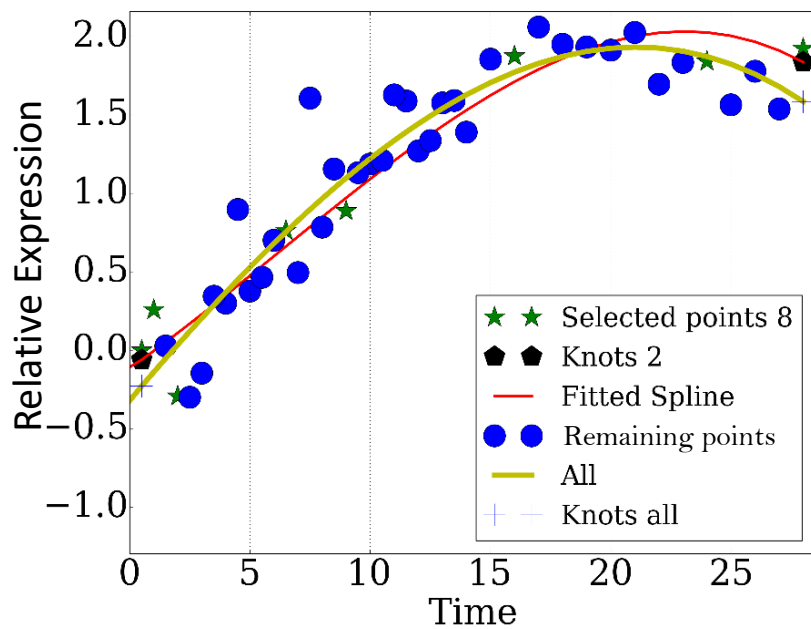

(a) *Pdgfra*

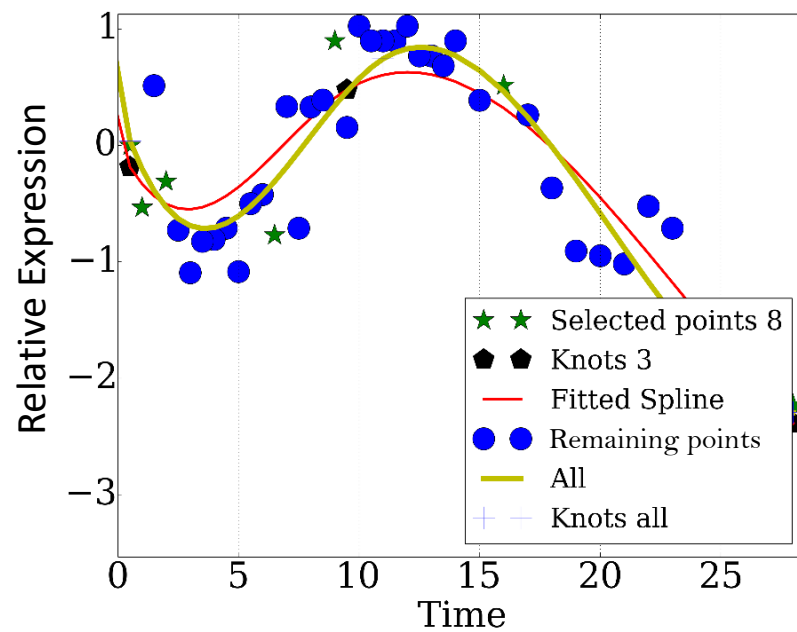

(b) *Eln*

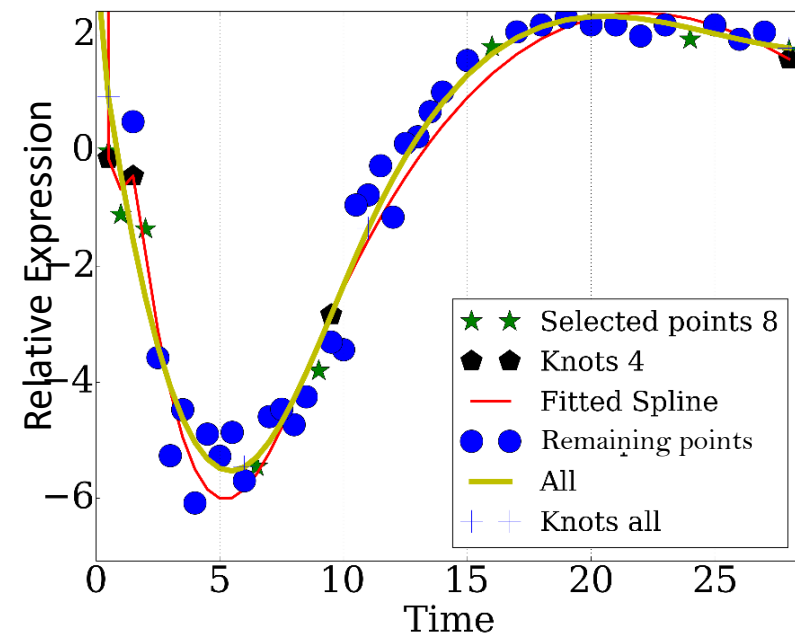

(c) *Inmt*

Supplement: supp [file elife-18541-supp-v1.zip › elife_poa_e18541_Figure_3_figure_supplement_2.pdf]

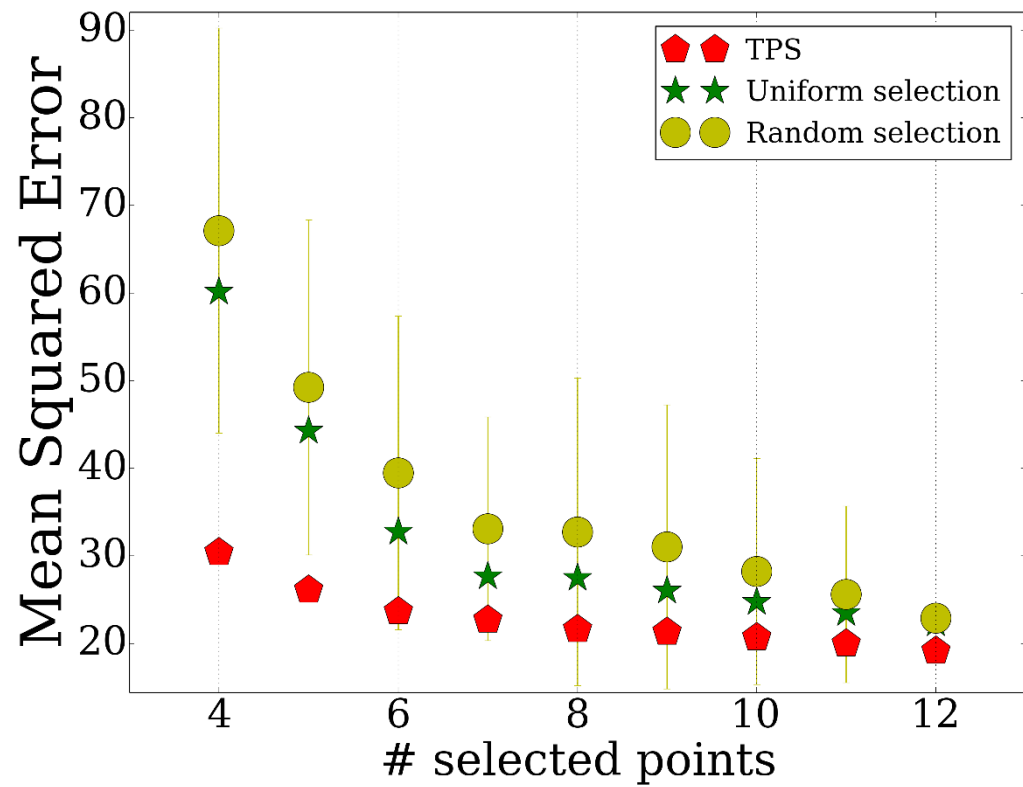

(a)

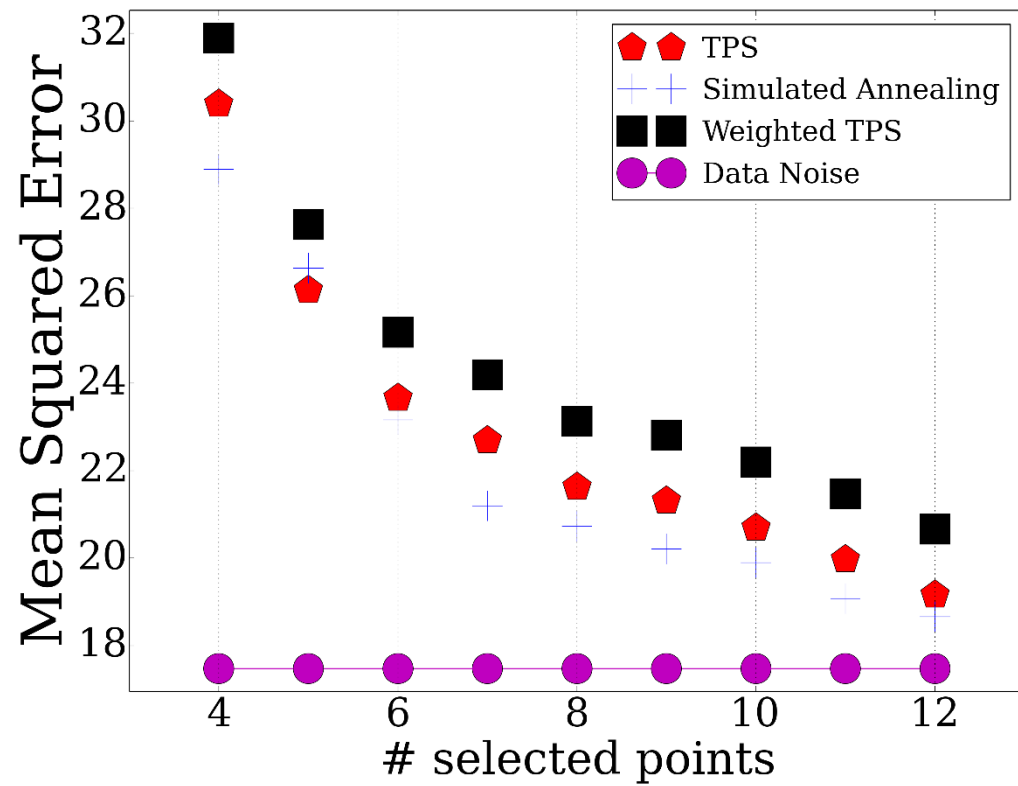

(b)

Supplement: supp [file elife-18541-supp-v1.zip › elife_poa_e18541_Figure_4_figure_supplement_3.pdf]

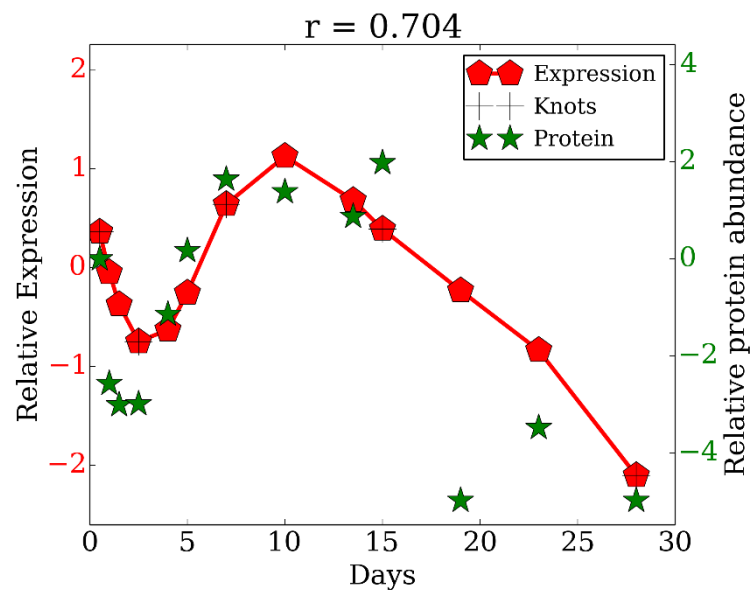

(a) *Eln* / P54320

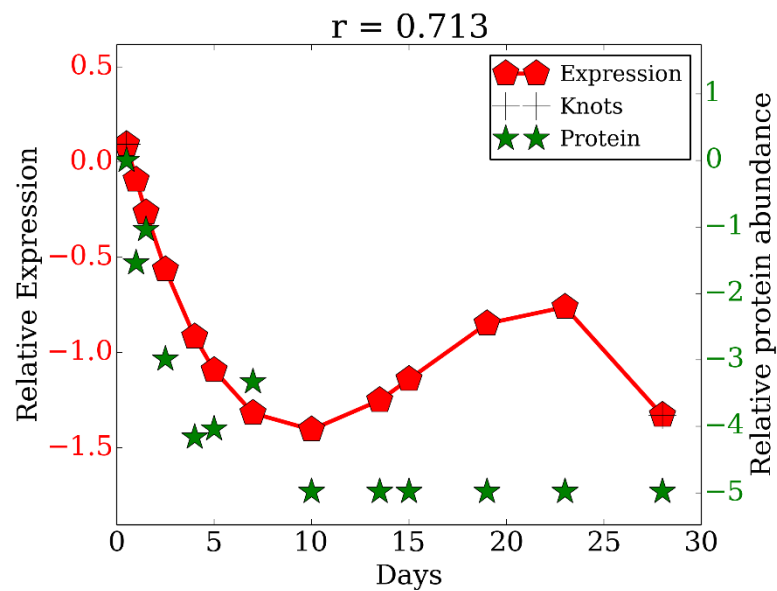

(b) *F13a1* / Q8BH61

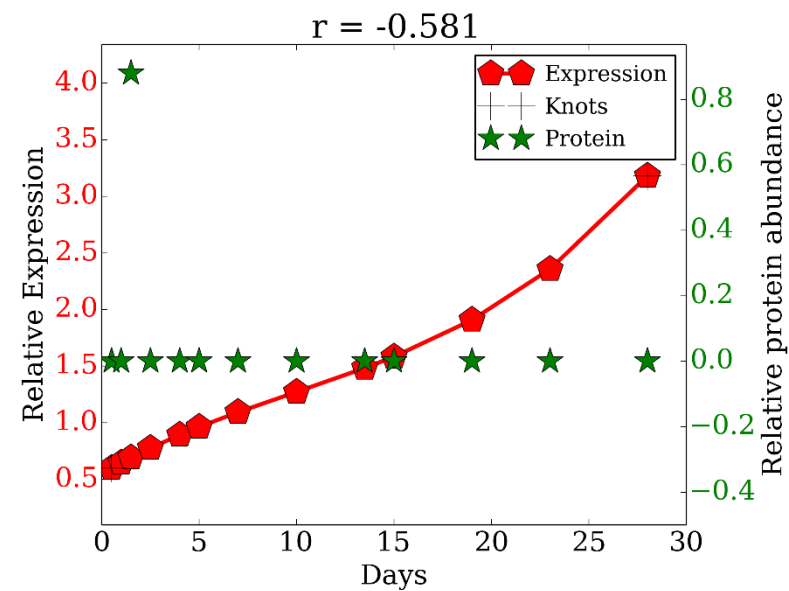

(c) *Chi3l1* / Q61362.

Supplement: supp [file elife-18541-supp-v1.zip › elife_poa_e18541_Figure_6_figure_supplement_1.pdf]

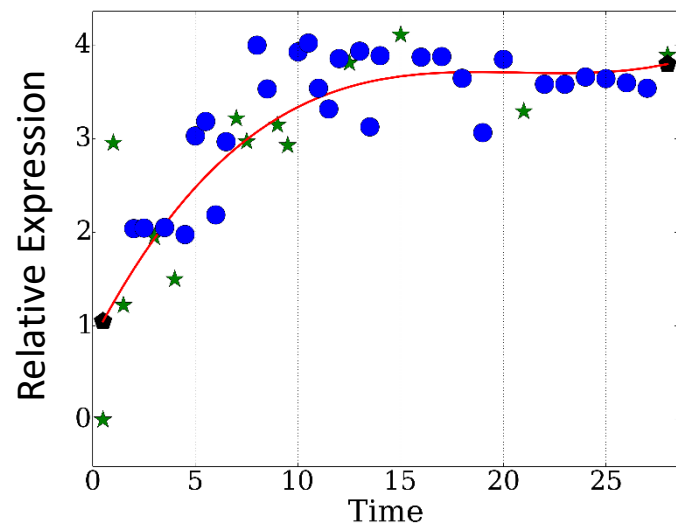

(a) *mmu-miR-100*

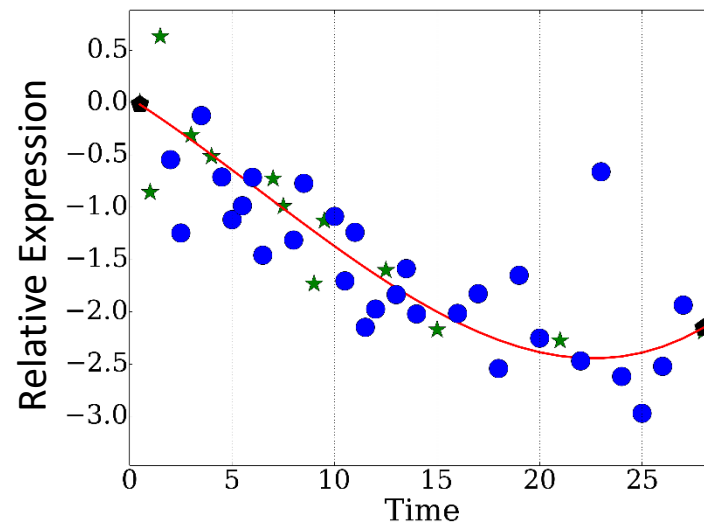

(b) *mmu-miR-136*

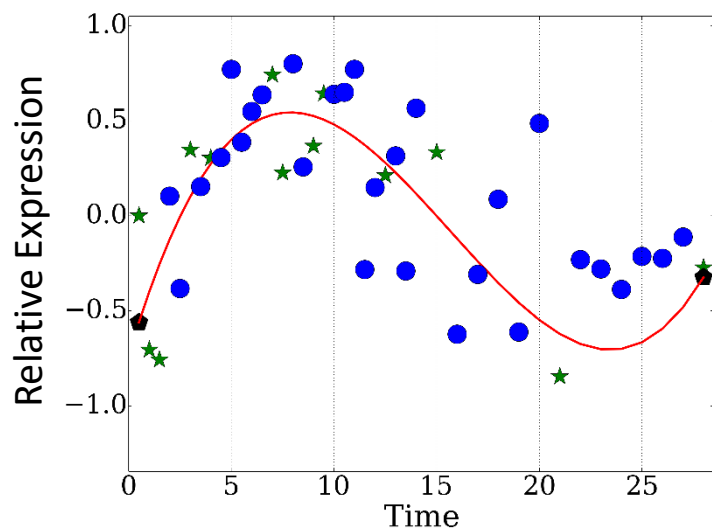

(c) *mmu-miR-152*

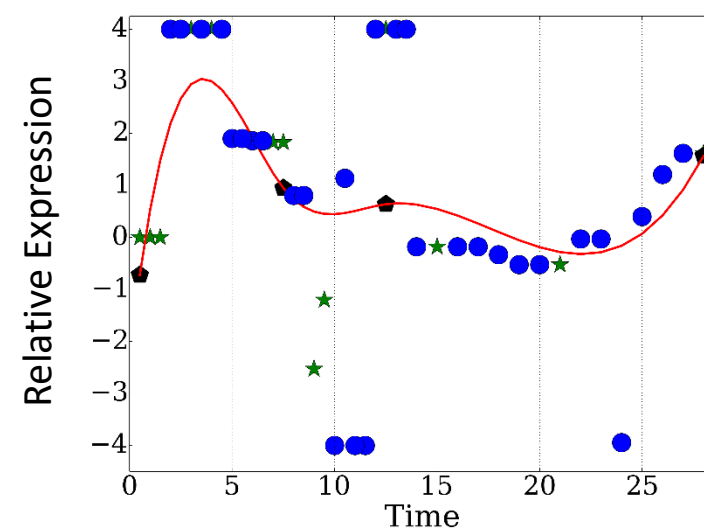

(d) *mmu-miR-219*

Supplement: supp [file elife-18541-supp-v1.zip › elife_poa_e18541_Figure_4_figure_supplement_2.pdf]
